# Supplementary material for: Comparative evaluation of analytical methods for CSF proteomics
Source: Clin Proteomics. 2025 Nov 28;22:46. doi: 10.1186/s12014-025-09568-y (PMC12661759; doi:10.1186/s12014-025-09568-y)
Supplement: Supplementary file 1 — Supplementary Material 1. [file 12014_2025_9568_MOESM1_ESM.xlsx]

## Sheet: cohort1
Clinical characteristics of study participants in cohort 1 (EV method and volume optimization)
Sample ID	Diagnosis	Gender	Age
S001	Lymphoma	Female	72
S002	Lymphoma	Male	72
S003	GBM	Female	29
S004	Astrocytoma	Male	36
S005	Acute Myelocytic Leukemia

## Sheet: cohort2
Clinical characteristics of study participants in cohort 2 (EV reproducibility analysis)
SampleID	Diagnosis	Gender	Age
Lym3	Lymphoma	Male	41
Lym7	Lymphoma	Male	45
Lym10	Lymphoma	Male	46
Lym9	Lymphoma	Male	51
Lym15	Lymphoma	Male	55
Lym13	Lymphoma	Male	57
Lym6	Lymphoma	Male	61
Lym2	Lymphoma	Female	78
Lym8	Lymphoma	Male	79
Lym12	Lymphoma	Male	80
Lym14	Lymphoma	Male	82

## Sheet: cohort3
Clinical characteristics of study participants in cohort 3 (primary cohort for methods comaprison)
Sample ID	Diagnosis	Gender	Age
1837	Lymphoma	Female	47
1850	Lymphoma	Female	52
2112	Lymphoma	Female	63
1821	Lymphoma	Female	68
2077	Lymphoma	Female	78
2028	Lymphoma	Female	81
1899	Lymphoma	Male	25
2106	Lymphoma	Male	41
1917	Lymphoma	Male	45
1934	Lymphoma	Male	53
2104	Lymphoma	Male	53
1975	Lymphoma	Male	55
1522	Lymphoma	Male	59
2131	Lymphoma	Male	66
1919	Lymphoma	Male	67
2012	Lymphoma	Male	67
1952	Lymphoma	Male	71
2030	Lymphoma	Male	74
1908	Lymphoma	Male	78
