# Supplementary material for: Comparative evaluation of analytical methods for CSF proteomics
Source: Clin Proteomics. 2025 Nov 28;22:46. doi: 10.1186/s12014-025-09568-y (PMC12661759; doi:10.1186/s12014-025-09568-y)
Supplement: Supplementary file 2 — Supplementary Material 2. [file 12014_2025_9568_MOESM2_ESM.xlsx]

## Sheet: Acquisition parameters
Mass spec data acquisition parameters
Cohort	Cohort 1		Cohort 2		Cohort 3
Fraction	P150-EV	P20-EV	P150-EV	P20-EV	MStern	Seer	N-Gp	P150-EV	P20-EV
Instrument	Eclipse	Eclipse	QE	QE	QE	QE	QE	QE	QE
MS1
Detector	Orbitrap	Orbitrap	Orbitrap	Orbitrap	Orbitrap	Orbitrap	Orbitrap	Orbitrap	Orbitrap
Resolution	120000	120000	70000	70000	140000	140000	70000	70000	70000
AGC target	1000000	1000000	1000000	1000000	1000000	1000000	3000000	1000000	1000000
Max IT (ms)	50	50	30	30	40	40	240	30	30
Scan range (m/z)	350-1550	350-1551	350-1800	350-1800	350-1800	350-1800	350-1800	350-1800	350-1800
Data type			Profile	Profile	Profile	Profile	Profile	Profile	Profile
MS2
Detector	Orbitrap	Orbitrap	Orbitrap	Orbitrap	Orbitrap	Orbitrap	Orbitrap	Orbitrap	Orbitrap
Resolution	15000	15000	17500	17500	35000	35000	17500	17500	17500
AGC target	100000	100000	100000	100000	200000	200000	200000	100000	100000
Max IT	100	100	120	120	55	55	100	120	120
DDA scan mode	Cycle time = 3 sec	Cycle time = 3 sec	Top N=10	Top N=10	Top N=25	Top N=25	Top N=20	Top N=10	10
Isolation window (m/z)	1	1	1.4	1.4	1.4	1.4	2	1.4	1.4
Isolation offset (m/z)	off	off	0.2	0.2	0.2	0.2	0.4	0.2	0.2
Scan range (m/z)	Auto	Auto	200-2000	200-2000	200-2000	200-2000	200-2000	200-2000	200-2000
NCE	32	32	30	30	27	27	27	30	30
Dynamic exclusion (s)	55	55	40	40	20	20	60	40	40
