# Supplementary material for: Comparative evaluation of analytical methods for CSF proteomics
Source: Clin Proteomics. 2025 Nov 28;22:46. doi: 10.1186/s12014-025-09568-y (PMC12661759; doi:10.1186/s12014-025-09568-y)
Supplement: Supplementary file 3 — Supplementary Material 3. [file 12014_2025_9568_MOESM3_ESM.xlsx]

## Sheet: BPall_supp5
Results from functional enrichment analysis, related to figure 4F
Cluster	ID	Description	GeneRatio	BgRatio	pvalue	p.adjust	qvalue	geneID	Count
P150	GO:0006959	humoral immune response	27/141	107/3116	3.30688e-14	6.18717e-11	5.86536e-11	A2M/C1RL/C1S/C2/C3/C5/C6/C7/CD59/CFB/CFH/CFHR1/CFI/F2/FGA/FGB/HRG/IGHA1/IGHA2/IGHG3/IGHG4/SERPING1/TF/SEMG1/SEMG2/EVPL/RNASE7	27
P150	GO:0006956	complement activation	18/141	54/3116	5.1935e-12	4.85852e-09	4.60581e-09	A2M/C1RL/C1S/C2/C3/C5/C6/C7/CD59/CFB/CFH/CFHR1/CFI/IGHA1/IGHA2/IGHG3/IGHG4/SERPING1	18
P150	GO:0006958	complement activation, classical pathway	13/141	35/3116	1.20769e-09	7.53194e-07	7.14019e-07	C1RL/C1S/C2/C3/C5/C6/C7/CFI/IGHA1/IGHA2/IGHG3/IGHG4/SERPING1	13
P150	GO:0002455	humoral immune response mediated by circulating immunoglobulin	13/141	40/3116	8.09412e-09	3.78602e-06	3.5891e-06	C1RL/C1S/C2/C3/C5/C6/C7/CFI/IGHA1/IGHA2/IGHG3/IGHG4/SERPING1	13
P150	GO:0019731	antibacterial humoral response	11/141	29/3116	1.90034e-08	7.11107e-06	6.74121e-06	FGA/FGB/IGHA1/IGHA2/IGHG3/IGHG4/TF/SEMG1/SEMG2/EVPL/RNASE7	11
P150	GO:0098542	defense response to other organism	36/141	305/3116	2.46415e-08	7.68405e-06	7.28438e-06	A2M/C1RL/C1S/C2/C3/C5/C6/C7/CADM1/CD14/CFB/CFH/CFHR1/CFI/CHGA/CSF1/F12/F2/FGA/FGB/HRG/IGHA1/IGHA2/IGHG3/IGHG4/PGLYRP2/RNASET2/SERPING1/SIRPA/TF/SEMG1/ANXA3/SEMG2/EVPL/RNASE7/S100A14	36
P150	GO:0019730	antimicrobial humoral response	13/141	47/3116	7.19433e-08	1.92294e-05	1.82293e-05	F2/FGA/FGB/HRG/IGHA1/IGHA2/IGHG3/IGHG4/TF/SEMG1/SEMG2/EVPL/RNASE7	13
P150	GO:0002253	activation of immune response	23/141	148/3116	9.08497e-08	2.12475e-05	2.01423e-05	A2M/C1RL/C1S/C2/C3/C5/C6/C7/CD14/CD59/CFB/CFH/CFHR1/CFI/GPLD1/ICOSLG/IGHA1/IGHA2/IGHG3/IGHG4/PRNP/SERPING1/S100A14	23
P150	GO:0006955	immune response	46/141	482/3116	1.49473e-07	2.86041e-05	2.71163e-05	A2M/ALCAM/AMBP/AZGP1/C1RL/C1S/C2/C3/C5/C6/C7/CADM1/CD14/CD59/CFB/CFH/CFHR1/CFI/CHGA/CSF1/CTSL/ENPP2/F12/F2/FGA/FGB/GPLD1/HRG/ICOSLG/IGHA1/IGHA2/IGHG3/IGHG4/PGLYRP2/PRNP/RNASET2/SERPING1/SIRPA/TF/IGKV3-7/SEMG1/ANXA3/SEMG2/EVPL/RNASE7/S100A14	46
P150	GO:0006952	defense response	43/141	434/3116	1.52881e-07	2.86041e-05	2.71163e-05	A2M/AHSG/C1RL/C1S/C2/C3/C5/C6/C7/CADM1/CD14/CD44/CFB/CFH/CFHR1/CFI/CHGA/CSF1/F12/F2/FGA/FGB/HRG/ICOSLG/IGHA1/IGHA2/IGHG3/IGHG4/KLKB1/LGALS3BP/PENK/PGLYRP2/RNASET2/SERPING1/SIRPA/TF/SEMG1/ANXA3/GGT5/SEMG2/EVPL/RNASE7/S100A14	43
P150	GO:0050778	positive regulation of immune response	25/141	187/3116	4.86384e-07	8.27296e-05	7.84266e-05	A2M/C1RL/C1S/C2/C3/C5/C6/C7/CADM1/CD14/CD59/CFB/CFH/CFHR1/CFI/GPLD1/HRG/ICOSLG/IGHA1/IGHA2/IGHG3/IGHG4/PRNP/SERPING1/S100A14	25
P150	GO:0050776	regulation of immune response	28/141	234/3116	9.48689e-07	0.000136612	0.000129507	A2M/AMBP/C1RL/C1S/C2/C3/C5/C6/C7/CADM1/CD14/CD59/CFB/CFH/CFHR1/CFI/GPLD1/HRG/ICOSLG/IGHA1/IGHA2/IGHG3/IGHG4/PGLYRP2/PRNP/SERPING1/EVPL/S100A14	28
P150	GO:0043207	response to external biotic stimulus	38/141	383/3116	1.02222e-06	0.000136612	0.000129507	A2M/C1RL/C1S/C2/C3/C5/C6/C7/CADM1/CD14/CFB/CFH/CFHR1/CFI/CHGA/CSF1/F12/F2/FGA/FGB/HRG/IGHA1/IGHA2/IGHG3/IGHG4/NPC2/PENK/PGLYRP2/RNASET2/SERPING1/SIRPA/TF/SEMG1/ANXA3/SEMG2/EVPL/RNASE7/S100A14	38
P150	GO:0051707	response to other organism	38/141	383/3116	1.02222e-06	0.000136612	0.000129507	A2M/C1RL/C1S/C2/C3/C5/C6/C7/CADM1/CD14/CFB/CFH/CFHR1/CFI/CHGA/CSF1/F12/F2/FGA/FGB/HRG/IGHA1/IGHA2/IGHG3/IGHG4/NPC2/PENK/PGLYRP2/RNASET2/SERPING1/SIRPA/TF/SEMG1/ANXA3/SEMG2/EVPL/RNASE7/S100A14	38
P150	GO:0042742	defense response to bacterium	16/141	88/3116	1.16688e-06	0.000145548	0.000137978	CHGA/F2/FGA/FGB/IGHA1/IGHA2/IGHG3/IGHG4/PGLYRP2/TF/SEMG1/ANXA3/SEMG2/EVPL/RNASE7/S100A14	16
P150	GO:0009607	response to biotic stimulus	38/141	388/3116	1.42791e-06	0.000166976	0.000158291	A2M/C1RL/C1S/C2/C3/C5/C6/C7/CADM1/CD14/CFB/CFH/CFHR1/CFI/CHGA/CSF1/F12/F2/FGA/FGB/HRG/IGHA1/IGHA2/IGHG3/IGHG4/NPC2/PENK/PGLYRP2/RNASET2/SERPING1/SIRPA/TF/SEMG1/ANXA3/SEMG2/EVPL/RNASE7/S100A14	38
P150	GO:0042730	fibrinolysis	8/141	21/3116	1.7822e-06	0.000196146	0.000185944	F12/F2/FGA/FGB/HRG/KLKB1/PLG/SERPING1	8
P150	GO:0044419	biological process involved in interspecies interaction between organisms	41/141	447/3116	2.77402e-06	0.000288344	0.000273346	A2M/BSG/C1RL/C1S/C2/C3/C5/C6/C7/CADM1/CD14/CFB/CFH/CFHR1/CFI/CHGA/CSF1/CTSL/F12/F2/FGA/FGB/HRG/IGHA1/IGHA2/IGHG3/IGHG4/NPC2/PENK/PGLYRP2/PLG/RNASET2/SERPING1/SIRPA/TF/SEMG1/ANXA3/SEMG2/EVPL/RNASE7/S100A14	41
P150	GO:0031640	killing of cells of another organism	9/141	32/3116	7.10388e-06	0.000664568	0.000630002	C5/C6/C7/CFHR1/CHGA/F2/HRG/SEMG1/RNASE7	9
P150	GO:0141061	disruption of cell in another organism	9/141	32/3116	7.10388e-06	0.000664568	0.000630002	C5/C6/C7/CFHR1/CHGA/F2/HRG/SEMG1/RNASE7	9
P150	GO:0009617	response to bacterium	22/141	177/3116	8.92954e-06	0.00079558	0.000754199	C2/C3/CD14/CFB/CHGA/F2/FGA/FGB/IGHA1/IGHA2/IGHG3/IGHG4/PENK/PGLYRP2/SIRPA/TF/SEMG1/ANXA3/SEMG2/EVPL/RNASE7/S100A14	22
P150	GO:0141060	disruption of anatomical structure in another organism	9/141	33/3116	9.39558e-06	0.000799051	0.00075749	C5/C6/C7/CFHR1/CHGA/F2/HRG/SEMG1/RNASE7	9
P150	GO:0001906	cell killing	13/141	76/3116	2.50732e-05	0.00203965	0.00193356	C3/C5/C6/C7/CADM1/CD59/CFH/CFHR1/CHGA/F2/HRG/SEMG1/RNASE7	13
P150	GO:0002252	immune effector process	24/141	218/3116	2.75455e-05	0.0021474	0.00203571	A2M/C1RL/C1S/C2/C3/C5/C6/C7/CADM1/CD59/CFB/CFH/CFHR1/CFI/CHGA/F2/IGHA1/IGHA2/IGHG3/IGHG4/PGLYRP2/SERPING1/ANXA3/EVPL	24
P150	GO:0016064	immunoglobulin mediated immune response	13/141	77/3116	2.90067e-05	0.00217086	0.00205795	C1RL/C1S/C2/C3/C5/C6/C7/CFI/IGHA1/IGHA2/IGHG3/IGHG4/SERPING1	13
P150	GO:0019724	B cell mediated immunity	13/141	78/3116	3.34701e-05	0.00232737	0.00220632	C1RL/C1S/C2/C3/C5/C6/C7/CFI/IGHA1/IGHA2/IGHG3/IGHG4/SERPING1	13
P150	GO:0098742	cell-cell adhesion via plasma-membrane adhesion molecules	16/141	113/3116	3.35858e-05	0.00232737	0.00220632	ALCAM/CADM1/CADM3/CDH11/CDH13/CDH2/CNTN2/FAT2/L1CAM/LRRC4B/NLGN1/PCDH7/PCDH9/PLXNB2/SLITRK1/SPARCL1	16
P150	GO:0030195	negative regulation of blood coagulation	8/141	33/3116	7.65152e-05	0.00511285	0.00484692	F12/F2/FGA/FGB/HRG/KLKB1/PLG/SERPING1	8
P150	GO:0098609	cell-cell adhesion	30/141	328/3116	9.27289e-05	0.00581075	0.00550852	ALCAM/CADM1/CADM3/CD44/CDH11/CDH13/CDH2/CNTN2/FAT2/FGA/FGB/ICAM5/ICOSLG/L1CAM/LRRC4B/NCAM2/NEGR1/NFASC/NLGN1/NRXN1/NRXN2/PCDH7/PCDH9/PLG/PLXNB2/PRNP/SIRPA/SLITRK1/SPARCL1/CRNN	30
P150	GO:0030193	regulation of blood coagulation	9/141	43/3116	9.31884e-05	0.00581075	0.00550852	F12/F2/FGA/FGB/HRG/KLKB1/PLG/SERPINC1/SERPING1	9
P150	GO:1900047	negative regulation of hemostasis	8/141	34/3116	9.62764e-05	0.00581075	0.00550852	F12/F2/FGA/FGB/HRG/KLKB1/PLG/SERPING1	8
P150	GO:1900046	regulation of hemostasis	9/141	44/3116	0.000112696	0.00658921	0.00624649	F12/F2/FGA/FGB/HRG/KLKB1/PLG/SERPINC1/SERPING1	9
P150	GO:0050819	negative regulation of coagulation	8/141	35/3116	0.000120087	0.00680858	0.00645444	F12/F2/FGA/FGB/HRG/KLKB1/PLG/SERPING1	8
P150	GO:0002684	positive regulation of immune system process	27/141	286/3116	0.000130283	0.00704301	0.00667668	A2M/C1RL/C1S/C2/C3/C5/C6/C7/CADM1/CD14/CD59/CFB/CFH/CFHR1/CFI/CSF1/GPLD1/HRG/ICOSLG/IGHA1/IGHA2/IGHG3/IGHG4/PRNP/SERPING1/SIRPA/S100A14	27
P150	GO:0045087	innate immune response	24/141	240/3116	0.000133602	0.00704301	0.00667668	A2M/C1RL/C1S/C2/C3/C5/C6/C7/CADM1/CD14/CFB/CFH/CFI/CHGA/CSF1/F12/FGA/FGB/PGLYRP2/RNASET2/SERPING1/SIRPA/RNASE7/S100A14	24
P150	GO:0050818	regulation of coagulation	9/141	45/3116	0.000135515	0.00704301	0.00667668	F12/F2/FGA/FGB/HRG/KLKB1/PLG/SERPINC1/SERPING1	9
P150	GO:0051917	regulation of fibrinolysis	5/141	13/3116	0.000169587	0.00834995	0.00791565	F12/F2/HRG/KLKB1/PLG	5
P150	GO:0072376	protein activation cascade	5/141	13/3116	0.000169587	0.00834995	0.00791565	F12/FBLN1/FGA/FGB/KLKB1	5
P150	GO:0002443	leukocyte mediated immunity	17/141	143/3116	0.000181492	0.00870698	0.00825411	C1RL/C1S/C2/C3/C5/C6/C7/CADM1/CFI/CHGA/F2/IGHA1/IGHA2/IGHG3/IGHG4/SERPING1/ANXA3	17
P150	GO:0002250	adaptive immune response	19/141	175/3116	0.000250937	0.0116028	0.0109993	ALCAM/C1RL/C1S/C2/C3/C5/C6/C7/CFI/CTSL/FGA/FGB/ICOSLG/IGHA1/IGHA2/IGHG3/IGHG4/SERPING1/IGKV3-7	19
P150	GO:0006957	complement activation, alternative pathway	5/141	14/3116	0.000254257	0.0116028	0.0109993	C3/C5/C7/CFB/CFH	5
P150	GO:0002920	regulation of humoral immune response	6/141	22/3116	0.000315843	0.0140701	0.0133382	A2M/C3/CD59/CFH/SERPING1/EVPL	6
P150	GO:0030449	regulation of complement activation	5/141	15/3116	0.000367597	0.0159948	0.0151628	A2M/C3/CD59/CFH/SERPING1	5
P150	GO:0007156	homophilic cell adhesion via plasma membrane adhesion molecules	11/141	76/3116	0.000500974	0.0213028	0.0201948	CADM1/CADM3/CDH11/CDH13/CDH2/CNTN2/FAT2/L1CAM/PCDH7/PCDH9/PLXNB2	11
P150	GO:1904861	excitatory synapse assembly	5/141	16/3116	0.000515374	0.0214281	0.0203136	LRRC4B/NLGN1/NRXN1/NRXN2/PLXNB2	5
P150	GO:0061045	negative regulation of wound healing	8/141	43/3116	0.000543924	0.0221235	0.0209728	F12/F2/FGA/FGB/HRG/KLKB1/PLG/SERPING1	8
P150	GO:0002449	lymphocyte mediated immunity	14/141	117/3116	0.00065108	0.0257365	0.0243979	C1RL/C1S/C2/C3/C5/C6/C7/CADM1/CFI/IGHA1/IGHA2/IGHG3/IGHG4/SERPING1	14
P150	GO:1903035	negative regulation of response to wounding	9/141	55/3116	0.000660263	0.0257365	0.0243979	EPHA4/F12/F2/FGA/FGB/HRG/KLKB1/PLG/SERPING1	9
P150	GO:0006508	proteolysis	34/141	443/3116	0.000921104	0.0351491	0.0333209	ADAMTS4/AEBP1/AHSG/C1RL/C1S/C2/CD44/CFB/CFH/CFI/CNTN2/CPE/CPQ/CPVL/CTSD/CTSL/EPHA4/F12/F2/FGA/FGB/GPLD1/HRG/HSP90B1/KLKB1/PLG/PRNP/SERPINA5/SERPINA6/SERPING1/SEMG1/GGT5/SEMG2/NCCRP1	34
P150	GO:0060074	synapse maturation	5/141	18/3116	0.000939312	0.0351491	0.0333209	BCAN/NLGN1/NRXN1/SEZ6/SEZ6L2	5
P150	GO:0007158	neuron cell-cell adhesion	4/141	11/3116	0.00103426	0.0365114	0.0346123	NCAM2/NLGN1/NRXN1/NRXN2	4
P150	GO:0045745	positive regulation of G protein-coupled receptor signaling pathway	4/141	11/3116	0.00103426	0.0365114	0.0346123	C3/CHGA/CNTN2/F2	4
P150	GO:0072378	blood coagulation, fibrin clot formation	4/141	11/3116	0.00103426	0.0365114	0.0346123	F12/FBLN1/FGA/FGB	4
P150	GO:0050817	coagulation	13/141	110/3116	0.00114868	0.0397995	0.0377294	CD59/F12/F2/FBLN1/FGA/FGB/HRG/KLKB1/PLG/SERPINC1/SERPING1/SEMG1/SEMG2	13
P150	GO:0097106	postsynaptic density organization	5/141	19/3116	0.00122886	0.0418037	0.0396294	CDH2/LRRC4B/NLGN1/NRXN1/NRXN2	5
P150	GO:0002682	regulation of immune system process	30/141	383/3116	0.00142271	0.0468828	0.0444443	A2M/AMBP/C1RL/C1S/C2/C3/C5/C6/C7/CADM1/CD14/CD59/CFB/CFH/CFHR1/CFI/CSF1/GPLD1/HRG/ICOSLG/IGHA1/IGHA2/IGHG3/IGHG4/PGLYRP2/PRNP/SERPING1/SIRPA/EVPL/S100A14	30
P150	GO:0061041	regulation of wound healing	9/141	61/3116	0.00142828	0.0468828	0.0444443	F12/F2/FGA/FGB/HRG/KLKB1/PLG/SERPINC1/SERPING1	9
MStern	GO:0002250	adaptive immune response	15/52	175/3116	6.94376e-08	7.63119e-05	7.38231e-05	CLU/FGA/FGB/IGHV4-4/IGHV6-1/IGHV2-26/IGHV3-43/IGHV1-3/IGHV3-38/IGHV2-70D/IGKV1-8/IGHV3-64D/IGLV2-11/IGLV6-57/IGLL1	15
MStern	GO:0016064	immunoglobulin mediated immune response	10/52	77/3116	3.21611e-07	0.000133461	0.000129108	CLU/IGHV4-4/IGHV6-1/IGHV2-26/IGHV3-43/IGHV1-3/IGHV3-38/IGHV2-70D/IGHV3-64D/IGLL1	10
MStern	GO:0019724	B cell mediated immunity	10/52	78/3116	3.64315e-07	0.000133461	0.000129108	CLU/IGHV4-4/IGHV6-1/IGHV2-26/IGHV3-43/IGHV1-3/IGHV3-38/IGHV2-70D/IGHV3-64D/IGLL1	10
MStern	GO:0002449	lymphocyte mediated immunity	10/52	117/3116	1.58195e-05	0.00404433	0.00391243	CLU/IGHV4-4/IGHV6-1/IGHV2-26/IGHV3-43/IGHV1-3/IGHV3-38/IGHV2-70D/IGHV3-64D/IGLL1	10
MStern	GO:0002460	adaptive immune response based on somatic recombination of immune receptors built from immunoglobulin superfamily domains	10/52	119/3116	1.84001e-05	0.00404433	0.00391243	CLU/IGHV4-4/IGHV6-1/IGHV2-26/IGHV3-43/IGHV1-3/IGHV3-38/IGHV2-70D/IGHV3-64D/IGLL1	10
MStern	GO:0019229	regulation of vasoconstriction	4/52	15/3116	8.22398e-05	0.0143182	0.0138513	FGA/FGB/FGG/ADM	4
MStern	GO:0002443	leukocyte mediated immunity	10/52	143/3116	9.11989e-05	0.0143182	0.0138513	CLU/IGHV4-4/IGHV6-1/IGHV2-26/IGHV3-43/IGHV1-3/IGHV3-38/IGHV2-70D/IGHV3-64D/IGLL1	10
MStern	GO:0006955	immune response	19/52	482/3116	0.000145224	0.0199502	0.0192995	CLU/FGA/FGB/IGHV4-4/IGHV6-1/IGHV2-26/IGHV3-43/IGHV1-3/IGHV3-38/IGHV2-70D/IGKV1-8/IGHV3-64D/IGLV2-11/IGLV6-57/IGLL1/CRISP3/SECTM1/SMPDL3B/IL1RAP	19
MStern	GO:0042310	vasoconstriction	4/52	19/3116	0.000222247	0.0271388	0.0262537	FGA/FGB/FGG/ADM	4
MStern	GO:0035150	regulation of tube size	5/52	37/3116	0.000309727	0.0283658	0.0274407	FGA/FGB/FGG/NPPC/ADM	5
MStern	GO:0035296	regulation of tube diameter	5/52	37/3116	0.000309727	0.0283658	0.0274407	FGA/FGB/FGG/NPPC/ADM	5
MStern	GO:0097746	blood vessel diameter maintenance	5/52	37/3116	0.000309727	0.0283658	0.0274407	FGA/FGB/FGG/NPPC/ADM	5
MStern	GO:0034114	regulation of heterotypic cell-cell adhesion	3/52	10/3116	0.000484515	0.0409602	0.0396243	FGA/FGB/FGG	3
MStern	GO:0072378	blood coagulation, fibrin clot formation	3/52	11/3116	0.000658374	0.0465805	0.0450614	FGA/FGB/FGG	3
MStern	GO:2000352	negative regulation of endothelial cell apoptotic process	3/52	11/3116	0.000658374	0.0465805	0.0450614	FGA/FGB/FGG	3
MStern	GO:0097190	apoptotic signaling pathway	9/52	150/3116	0.000678152	0.0465805	0.0450614	CLU/FGA/FGB/FGG/ACVR1B/ACAA2/DAP/TNFRSF12A/ATP5IF1	9
P20	GO:0045333	cellular respiration	52/337	103/3116	8.23008e-25	2.1785e-21	2.00381e-21	NDUFA4/NDUFS4/NDUFB3/IDH3B/NDUFS5/NDUFS2/NDUFB1/NDUFS3/SLC25A12/ATP5PD/ATP5MG/NDUFB4/NDUFA7/NDUFC2/NDUFA10/NDUFB10/CYC1/COX6C/COX4I1/COX7A2/UQCRB/COX7C/NDUFB7/GPD1/UQCRC2/ATP5PB/NDUFS1/UQCRC1/GPD2/UQCRFS1/ATP5PO/NDUFV1/IDH3G/NDUFA8/ATP5MF/ATP5ME/NDUFA6/OGDH/NNT/NDUFA5/NDUFA9/SLC25A22/TRPV4/CISD1/NDUFA13/SUCLA2/UQCR10/NDUFA12/SLC25A13/STOML2/OGDHL/NDUFB9	52
P20	GO:0022904	respiratory electron transport chain	36/337	55/3116	1.23896e-22	1.63977e-19	1.50827e-19	NDUFA4/NDUFS4/NDUFB3/NDUFS5/NDUFS2/NDUFB1/NDUFS3/SLC25A12/NDUFB4/NDUFA7/NDUFC2/NDUFA10/NDUFB10/CYC1/COX6C/COX4I1/COX7A2/UQCRB/COX7C/NDUFB7/GPD1/UQCRC2/NDUFS1/UQCRC1/GPD2/UQCRFS1/NDUFV1/NDUFA8/NDUFA6/NDUFA5/NDUFA9/SLC25A22/UQCR10/NDUFA12/SLC25A13/NDUFB9	36
P20	GO:0006119	oxidative phosphorylation	39/337	65/3116	2.06501e-22	1.82202e-19	1.67592e-19	NDUFA4/NDUFS4/NDUFB3/NDUFS5/NDUFS2/NDUFB1/NDUFS3/ATP5PD/ATP5MG/NDUFB4/NDUFA7/NDUFC2/NDUFA10/NDUFB10/CYC1/COX6C/COX4I1/COX7A2/UQCRB/COX7C/NDUFB7/UQCRC2/ATP5PB/NDUFS1/UQCRC1/UQCRFS1/ATP5PO/NDUFV1/NDUFA8/ATP5MF/ATP5ME/NDUFA6/NDUFA5/NDUFA9/NDUFA13/UQCR10/NDUFA12/STOML2/NDUFB9	39
P20	GO:0009060	aerobic respiration	46/337	91/3116	5.13033e-22	3.39499e-19	3.12275e-19	NDUFA4/NDUFS4/NDUFB3/IDH3B/NDUFS5/NDUFS2/NDUFB1/NDUFS3/ATP5PD/ATP5MG/NDUFB4/NDUFA7/NDUFC2/NDUFA10/NDUFB10/CYC1/COX6C/COX4I1/COX7A2/UQCRB/COX7C/NDUFB7/UQCRC2/ATP5PB/NDUFS1/UQCRC1/UQCRFS1/ATP5PO/NDUFV1/IDH3G/NDUFA8/ATP5MF/ATP5ME/NDUFA6/OGDH/NNT/NDUFA5/NDUFA9/TRPV4/NDUFA13/SUCLA2/UQCR10/NDUFA12/STOML2/OGDHL/NDUFB9	46
P20	GO:0022900	electron transport chain	40/337	70/3116	7.45852e-22	3.94854e-19	3.63191e-19	NDUFA4/NDUFS4/NDUFB3/IDH3B/NDUFS5/NDUFS2/NDUFB1/NDUFS3/SLC25A12/NDUFB4/NDUFA7/NDUFC2/NDUFA10/NDUFB10/CYC1/COX6C/COX4I1/CYBA/COX7A2/UQCRB/COX7C/NDUFB7/GPD1/UQCRC2/MAOB/NDUFS1/ALDH4A1/UQCRC1/GPD2/UQCRFS1/NDUFV1/NDUFA8/NDUFA6/NDUFA5/NDUFA9/SLC25A22/UQCR10/NDUFA12/SLC25A13/NDUFB9	40
P20	GO:0015980	energy derivation by oxidation of organic compounds	53/337	125/3116	9.17253e-21	4.04661e-18	3.72212e-18	NDUFA4/NDUFS4/NDUFB3/IDH3B/NDUFS5/NDUFS2/NDUFB1/NDUFS3/SLC25A12/ATP5PD/ATP5MG/NDUFB4/NDUFA7/NDUFC2/NDUFA10/NDUFB10/CYC1/COX6C/COX4I1/COX7A2/UQCRB/COX7C/NDUFB7/GPD1/UQCRC2/ATP5PB/NDUFS1/UQCRC1/GPD2/UQCRFS1/ATP5PO/ACADVL/NDUFV1/IDH3G/NDUFA8/ATP5MF/ATP5ME/NDUFA6/OGDH/NNT/NDUFA5/NDUFA9/SLC25A22/TRPV4/CISD1/NDUFA13/SUCLA2/UQCR10/NDUFA12/SLC25A13/STOML2/OGDHL/NDUFB9	53
P20	GO:0042773	ATP synthesis coupled electron transport	31/337	46/3116	3.56255e-20	1.17876e-17	1.08423e-17	NDUFA4/NDUFS4/NDUFB3/NDUFS5/NDUFS2/NDUFB1/NDUFS3/NDUFB4/NDUFA7/NDUFC2/NDUFA10/NDUFB10/CYC1/COX6C/COX4I1/COX7A2/UQCRB/COX7C/NDUFB7/UQCRC2/NDUFS1/UQCRC1/UQCRFS1/NDUFV1/NDUFA8/NDUFA6/NDUFA5/NDUFA9/UQCR10/NDUFA12/NDUFB9	31
P20	GO:0042775	mitochondrial ATP synthesis coupled electron transport	31/337	46/3116	3.56255e-20	1.17876e-17	1.08423e-17	NDUFA4/NDUFS4/NDUFB3/NDUFS5/NDUFS2/NDUFB1/NDUFS3/NDUFB4/NDUFA7/NDUFC2/NDUFA10/NDUFB10/CYC1/COX6C/COX4I1/COX7A2/UQCRB/COX7C/NDUFB7/UQCRC2/NDUFS1/UQCRC1/UQCRFS1/NDUFV1/NDUFA8/NDUFA6/NDUFA5/NDUFA9/UQCR10/NDUFA12/NDUFB9	31
P20	GO:0019646	aerobic electron transport chain	30/337	44/3116	8.87793e-20	2.6111e-17	2.40171e-17	NDUFA4/NDUFS4/NDUFB3/NDUFS5/NDUFS2/NDUFB1/NDUFS3/NDUFB4/NDUFA7/NDUFC2/NDUFA10/NDUFB10/CYC1/COX6C/COX4I1/COX7A2/UQCRB/COX7C/NDUFB7/UQCRC2/NDUFS1/UQCRC1/UQCRFS1/NDUFV1/NDUFA8/NDUFA6/NDUFA5/NDUFA9/UQCR10/NDUFB9	30
P20	GO:0042776	proton motive force-driven mitochondrial ATP synthesis	28/337	39/3116	1.75076e-19	4.63427e-17	4.26265e-17	NDUFS4/NDUFB3/NDUFS5/NDUFS2/NDUFB1/NDUFS3/ATP5PD/ATP5MG/NDUFB4/NDUFA7/NDUFC2/NDUFA10/NDUFB10/NDUFB7/ATP5PB/NDUFS1/ATP5PO/NDUFV1/NDUFA8/ATP5MF/ATP5ME/NDUFA6/NDUFA5/NDUFA9/NDUFA13/NDUFA12/STOML2/NDUFB9	28
P20	GO:0046034	ATP metabolic process	36/337	65/3116	4.05346e-19	9.75409e-17	8.97191e-17	ATP1B1/DNM1L/NDUFS4/NDUFB3/NDUFS5/NDUFS2/NDUFB1/NDUFS3/ATP5PD/ATP5MG/NDUFB4/NDUFA7/NDUFC2/NDUFA10/NDUFB10/MYH3/MYH6/MYH8/NDUFB7/ATP5PB/NDUFS1/ATP5PO/NDUFV1/NDUFA8/ATP5MF/ATP5ME/NDUFA6/NDUFA5/NDUFA9/NDUFA13/NDUFA12/SLC25A13/STOML2/FIS1/MYH4/NDUFB9	36
P20	GO:0033108	mitochondrial respiratory chain complex assembly	22/337	25/3116	5.06962e-19	1.07324e-16	9.8718e-17	NDUFS4/NDUFB3/NDUFS5/NDUFS2/NDUFB1/NDUFS3/NDUFB4/NDUFC2/NDUFA10/NDUFB10/NDUFB7/NDUFS1/UQCRFS1/NDUFA8/NDUFA6/NDUFA5/NDUFA9/NDUFAF4/NDUFA13/NDUFA12/SAMM50/NDUFB9	22
P20	GO:0015986	proton motive force-driven ATP synthesis	28/337	40/3116	5.27093e-19	1.07324e-16	9.8718e-17	NDUFS4/NDUFB3/NDUFS5/NDUFS2/NDUFB1/NDUFS3/ATP5PD/ATP5MG/NDUFB4/NDUFA7/NDUFC2/NDUFA10/NDUFB10/NDUFB7/ATP5PB/NDUFS1/ATP5PO/NDUFV1/NDUFA8/ATP5MF/ATP5ME/NDUFA6/NDUFA5/NDUFA9/NDUFA13/NDUFA12/STOML2/NDUFB9	28
P20	GO:0009205	purine ribonucleoside triphosphate metabolic process	37/337	71/3116	2.01441e-18	3.80867e-16	3.50325e-16	ATP1B1/DNM1L/NDUFS4/NDUFB3/NDUFS5/OPA1/NDUFS2/NDUFB1/NDUFS3/ATP5PD/ATP5MG/NDUFB4/NDUFA7/NDUFC2/NDUFA10/NDUFB10/MYH3/MYH6/MYH8/NDUFB7/ATP5PB/NDUFS1/ATP5PO/NDUFV1/NDUFA8/ATP5MF/ATP5ME/NDUFA6/NDUFA5/NDUFA9/NDUFA13/NDUFA12/SLC25A13/STOML2/FIS1/MYH4/NDUFB9	37
P20	GO:0007005	mitochondrion organization	50/337	126/3116	4.1265e-18	7.28189e-16	6.69795e-16	CLU/DNM1L/ATP2A1/NDUFS4/NDUFB3/NDUFS5/OPA1/NDUFS2/MTX2/NDUFB1/NDUFS3/NDUFB4/LETM1/NDUFC2/NDUFA10/NDUFB10/SLC25A5/RALA/SLC25A4/SLC25A6/COX7A2/NDUFB7/NDUFS1/PHB1/VDAC2/UQCRFS1/NDUFA8/NDUFA6/CNTNAP1/NDUFA5/NDUFA9/IMMT/INF2/MICOS10/CISD2/PHB2/CHCHD6/APOO/TOMM22/ATAD3A/CHCHD3/NDUFAF4/NDUFA13/NDUFA12/STOML2/FIS1/AFG3L2/SAMM50/MTCH2/NDUFB9	50
P20	GO:0010257	NADH dehydrogenase complex assembly	20/337	22/3116	5.39457e-18	8.16964e-16	7.51452e-16	NDUFS4/NDUFB3/NDUFS5/NDUFS2/NDUFB1/NDUFS3/NDUFB4/NDUFC2/NDUFA10/NDUFB10/NDUFB7/NDUFS1/NDUFA8/NDUFA6/NDUFA5/NDUFA9/NDUFAF4/NDUFA13/NDUFA12/NDUFB9	20
P20	GO:0032981	mitochondrial respiratory chain complex I assembly	20/337	22/3116	5.39457e-18	8.16964e-16	7.51452e-16	NDUFS4/NDUFB3/NDUFS5/NDUFS2/NDUFB1/NDUFS3/NDUFB4/NDUFC2/NDUFA10/NDUFB10/NDUFB7/NDUFS1/NDUFA8/NDUFA6/NDUFA5/NDUFA9/NDUFAF4/NDUFA13/NDUFA12/NDUFB9	20
P20	GO:0055085	transmembrane transport	75/337	255/3116	5.55548e-18	8.16964e-16	7.51452e-16	ATP1B1/ATP6AP1/SLC3A2/FXYD1/NDUFA4/ATP2A1/ABCC4/ATP6V1G1/SLC25A12/ATP5PD/ATP5MG/LETM1/ITGB3/SLC25A5/PRKCB/FYN/CYC1/SLC25A4/SLC25A6/COX4I1/CYBA/ATP2A2/CD36/GJA1/RHCE/KEL/ATP5PB/HTR2C/UQCRC1/SLC19A1/SLC1A3/SLC1A4/VDAC2/UQCRFS1/ATP5PO/TMED10/ATP5MF/ATP5ME/DLG4/SLC25A3/SLC7A5/RHAG/SLC25A11/PLP2/DLG1/SLC14A1/NNT/ATP6V1F/CYBRD1/SLC47A2/SLC44A2/GPD1L/SLC16A10/SLC44A1/PIEZO1/ATP6V0A1/PHB2/SLC29A1/SFXN3/F…	75
P20	GO:0009144	purine nucleoside triphosphate metabolic process	37/337	73/3116	6.87242e-18	9.09565e-16	8.36627e-16	ATP1B1/DNM1L/NDUFS4/NDUFB3/NDUFS5/OPA1/NDUFS2/NDUFB1/NDUFS3/ATP5PD/ATP5MG/NDUFB4/NDUFA7/NDUFC2/NDUFA10/NDUFB10/MYH3/MYH6/MYH8/NDUFB7/ATP5PB/NDUFS1/ATP5PO/NDUFV1/NDUFA8/ATP5MF/ATP5ME/NDUFA6/NDUFA5/NDUFA9/NDUFA13/NDUFA12/SLC25A13/STOML2/FIS1/MYH4/NDUFB9	37
P20	GO:0009199	ribonucleoside triphosphate metabolic process	37/337	73/3116	6.87242e-18	9.09565e-16	8.36627e-16	ATP1B1/DNM1L/NDUFS4/NDUFB3/NDUFS5/OPA1/NDUFS2/NDUFB1/NDUFS3/ATP5PD/ATP5MG/NDUFB4/NDUFA7/NDUFC2/NDUFA10/NDUFB10/MYH3/MYH6/MYH8/NDUFB7/ATP5PB/NDUFS1/ATP5PO/NDUFV1/NDUFA8/ATP5MF/ATP5ME/NDUFA6/NDUFA5/NDUFA9/NDUFA13/NDUFA12/SLC25A13/STOML2/FIS1/MYH4/NDUFB9	37
P20	GO:0006091	generation of precursor metabolites and energy	60/337	182/3116	5.32756e-17	6.71526e-15	6.17676e-15	NDUFA4/NDUFS4/NDUFB3/IDH3B/NDUFS5/NDUFS2/NDUFB1/NDUFS3/SLC25A12/ALDH1L1/ATP5PD/ATP5MG/NDUFB4/NDUFA7/NDUFC2/NDUFA10/NDUFB10/CYC1/COX6C/SLC25A4/COX4I1/CYBA/COX7A2/UQCRB/COX7C/NDUFB7/GPD1/UQCRC2/ATP5PB/MAOB/NDUFS1/ALDH4A1/UQCRC1/GPD2/UQCRFS1/ATP5PO/ACADVL/NDUFV1/IDH3G/GALK1/NDUFA8/ATP5MF/ATP5ME/NDUFA6/OGDH/NNT/NDUFA5/NDUFA9/PHB2/SLC25A22/TRPV4/CISD1/NDUFA13/SUCLA2/UQCR10/NDUFA12/SLC25A13/STOML2/OGDH…	60
P20	GO:0009141	nucleoside triphosphate metabolic process	37/337	78/3116	1.17063e-16	1.36444e-14	1.25502e-14	ATP1B1/DNM1L/NDUFS4/NDUFB3/NDUFS5/OPA1/NDUFS2/NDUFB1/NDUFS3/ATP5PD/ATP5MG/NDUFB4/NDUFA7/NDUFC2/NDUFA10/NDUFB10/MYH3/MYH6/MYH8/NDUFB7/ATP5PB/NDUFS1/ATP5PO/NDUFV1/NDUFA8/ATP5MF/ATP5ME/NDUFA6/NDUFA5/NDUFA9/NDUFA13/NDUFA12/SLC25A13/STOML2/FIS1/MYH4/NDUFB9	37
P20	GO:0006754	ATP biosynthetic process	29/337	49/3116	1.18557e-16	1.36444e-14	1.25502e-14	NDUFS4/NDUFB3/NDUFS5/NDUFS2/NDUFB1/NDUFS3/ATP5PD/ATP5MG/NDUFB4/NDUFA7/NDUFC2/NDUFA10/NDUFB10/NDUFB7/ATP5PB/NDUFS1/ATP5PO/NDUFV1/NDUFA8/ATP5MF/ATP5ME/NDUFA6/NDUFA5/NDUFA9/NDUFA13/NDUFA12/SLC25A13/STOML2/NDUFB9	29
P20	GO:0009150	purine ribonucleotide metabolic process	47/337	122/3116	1.90715e-16	2.10343e-14	1.93476e-14	ATP1B1/PDHX/DNM1L/NDUFS4/NDUFB3/NDUFS5/OPA1/NDUFS2/NDUFB1/NDUFS3/ATP5PD/ATP5MG/NDUFB4/NDUFA7/NDUFC2/NDUFA10/NDUFB10/MYH3/MYH6/MYH8/NDUFB7/ATP5PB/NDUFS1/ATP5PO/NDUFV1/HSD17B4/NDUFA8/ATP5MF/ATP5ME/NDUFA6/OGDH/DLG1/NDUFA5/GUK1/NDUFA9/HSD17B12/TECR/NDUFA13/SUCLA2/TJP2/NDUFA12/SLC25A13/STOML2/ACSL6/FIS1/MYH4/NDUFB9	47
P20	GO:0009259	ribonucleotide metabolic process	47/337	126/3116	8.54364e-16	9.04601e-14	8.32061e-14	ATP1B1/PDHX/DNM1L/NDUFS4/NDUFB3/NDUFS5/OPA1/NDUFS2/NDUFB1/NDUFS3/ATP5PD/ATP5MG/NDUFB4/NDUFA7/NDUFC2/NDUFA10/NDUFB10/MYH3/MYH6/MYH8/NDUFB7/ATP5PB/NDUFS1/ATP5PO/NDUFV1/HSD17B4/NDUFA8/ATP5MF/ATP5ME/NDUFA6/OGDH/DLG1/NDUFA5/GUK1/NDUFA9/HSD17B12/TECR/NDUFA13/SUCLA2/TJP2/NDUFA12/SLC25A13/STOML2/ACSL6/FIS1/MYH4/NDUFB9	47
P20	GO:0009206	purine ribonucleoside triphosphate biosynthetic process	29/337	52/3116	1.08998e-15	1.10969e-13	1.0207e-13	NDUFS4/NDUFB3/NDUFS5/NDUFS2/NDUFB1/NDUFS3/ATP5PD/ATP5MG/NDUFB4/NDUFA7/NDUFC2/NDUFA10/NDUFB10/NDUFB7/ATP5PB/NDUFS1/ATP5PO/NDUFV1/NDUFA8/ATP5MF/ATP5ME/NDUFA6/NDUFA5/NDUFA9/NDUFA13/NDUFA12/SLC25A13/STOML2/NDUFB9	29
P20	GO:0009145	purine nucleoside triphosphate biosynthetic process	29/337	53/3116	2.17391e-15	2.13124e-13	1.96034e-13	NDUFS4/NDUFB3/NDUFS5/NDUFS2/NDUFB1/NDUFS3/ATP5PD/ATP5MG/NDUFB4/NDUFA7/NDUFC2/NDUFA10/NDUFB10/NDUFB7/ATP5PB/NDUFS1/ATP5PO/NDUFV1/NDUFA8/ATP5MF/ATP5ME/NDUFA6/NDUFA5/NDUFA9/NDUFA13/NDUFA12/SLC25A13/STOML2/NDUFB9	29
P20	GO:0072521	purine-containing compound metabolic process	53/337	160/3116	3.72033e-15	3.51704e-13	3.23501e-13	ATP1B1/TTR/PDHX/DNM1L/NDUFS4/NDUFB3/NDUFS5/OPA1/NDUFS2/NDUFB1/NDUFS3/ALDH1L1/ATP5PD/ATP5MG/NDUFB4/NDUFA7/NDUFC2/NDUFA10/NDUFB10/MYH3/MYH6/MYH8/NDUFB7/GPD1/ATP5PB/NDUFS1/ATP5PO/NDUFV1/HSD17B4/NDUFA8/ATP5MF/ATP5ME/NDUFA6/OGDH/DLG1/NNT/NDUFA5/GUK1/NDUFA9/HSD17B12/GPD1L/TECR/NDUFA13/SUCLA2/TJP2/NDUFA12/SLC25A13/STOML2/ACSL6/ABCG2/FIS1/MYH4/NDUFB9	53
P20	GO:0009201	ribonucleoside triphosphate biosynthetic process	29/337	54/3116	4.24077e-15	3.8708e-13	3.5604e-13	NDUFS4/NDUFB3/NDUFS5/NDUFS2/NDUFB1/NDUFS3/ATP5PD/ATP5MG/NDUFB4/NDUFA7/NDUFC2/NDUFA10/NDUFB10/NDUFB7/ATP5PB/NDUFS1/ATP5PO/NDUFV1/NDUFA8/ATP5MF/ATP5ME/NDUFA6/NDUFA5/NDUFA9/NDUFA13/NDUFA12/SLC25A13/STOML2/NDUFB9	29
P20	GO:0019693	ribose phosphate metabolic process	47/337	131/3116	5.01242e-15	4.42263e-13	4.06798e-13	ATP1B1/PDHX/DNM1L/NDUFS4/NDUFB3/NDUFS5/OPA1/NDUFS2/NDUFB1/NDUFS3/ATP5PD/ATP5MG/NDUFB4/NDUFA7/NDUFC2/NDUFA10/NDUFB10/MYH3/MYH6/MYH8/NDUFB7/ATP5PB/NDUFS1/ATP5PO/NDUFV1/HSD17B4/NDUFA8/ATP5MF/ATP5ME/NDUFA6/OGDH/DLG1/NDUFA5/GUK1/NDUFA9/HSD17B12/TECR/NDUFA13/SUCLA2/TJP2/NDUFA12/SLC25A13/STOML2/ACSL6/FIS1/MYH4/NDUFB9	47
P20	GO:0006163	purine nucleotide metabolic process	51/337	152/3116	7.29467e-15	6.22871e-13	5.72923e-13	ATP1B1/PDHX/DNM1L/NDUFS4/NDUFB3/NDUFS5/OPA1/NDUFS2/NDUFB1/NDUFS3/ALDH1L1/ATP5PD/ATP5MG/NDUFB4/NDUFA7/NDUFC2/NDUFA10/NDUFB10/MYH3/MYH6/MYH8/NDUFB7/GPD1/ATP5PB/NDUFS1/ATP5PO/NDUFV1/HSD17B4/NDUFA8/ATP5MF/ATP5ME/NDUFA6/OGDH/DLG1/NNT/NDUFA5/GUK1/NDUFA9/HSD17B12/GPD1L/TECR/NDUFA13/SUCLA2/TJP2/NDUFA12/SLC25A13/STOML2/ACSL6/FIS1/MYH4/NDUFB9	51
P20	GO:0006120	mitochondrial electron transport, NADH to ubiquinone	20/337	27/3116	1.24142e-14	1.02689e-12	9.44545e-13	NDUFA4/NDUFS4/NDUFB3/NDUFS5/NDUFS2/NDUFB1/NDUFS3/NDUFB4/NDUFA7/NDUFC2/NDUFA10/NDUFB10/NDUFB7/NDUFS1/NDUFV1/NDUFA8/NDUFA6/NDUFA5/NDUFA9/NDUFB9	20
P20	GO:0009142	nucleoside triphosphate biosynthetic process	29/337	56/3116	1.51751e-14	1.21723e-12	1.11962e-12	NDUFS4/NDUFB3/NDUFS5/NDUFS2/NDUFB1/NDUFS3/ATP5PD/ATP5MG/NDUFB4/NDUFA7/NDUFC2/NDUFA10/NDUFB10/NDUFB7/ATP5PB/NDUFS1/ATP5PO/NDUFV1/NDUFA8/ATP5MF/ATP5ME/NDUFA6/NDUFA5/NDUFA9/NDUFA13/NDUFA12/SLC25A13/STOML2/NDUFB9	29
P20	GO:1902600	proton transmembrane transport	28/337	53/3116	2.26619e-14	1.7643e-12	1.62282e-12	ATP1B1/ATP6AP1/NDUFA4/ATP6V1G1/SLC25A12/ATP5PD/ATP5MG/LETM1/SLC25A5/CYC1/SLC25A4/COX4I1/ATP5PB/UQCRC1/UQCRFS1/ATP5PO/ATP5MF/ATP5ME/SLC25A3/NNT/ATP6V1F/SLC47A2/ATP6V0A1/PHB2/SLC25A22/SLC17A7/UQCR10/SLC25A13	28
P20	GO:0034220	monoatomic ion transmembrane transport	57/337	197/3116	2.4616e-13	1.86168e-11	1.71239e-11	ATP1B1/ATP6AP1/SLC3A2/FXYD1/NDUFA4/ATP2A1/ABCC4/ATP6V1G1/SLC25A12/ATP5PD/ATP5MG/LETM1/ITGB3/SLC25A5/FYN/CYC1/SLC25A4/COX4I1/CYBA/ATP2A2/GJA1/KEL/ATP5PB/HTR2C/UQCRC1/SLC19A1/SLC1A3/SLC1A4/VDAC2/UQCRFS1/ATP5PO/ATP5MF/ATP5ME/SLC25A3/PLP2/DLG1/NNT/ATP6V1F/SLC47A2/GPD1L/PIEZO1/ATP6V0A1/PHB2/SFXN3/FXYD6/SLC25A22/SFXN1/TRPV4/ABCB6/SLC17A7/UQCR10/SLC24A2/SLC25A13/SLC8A2/VDAC3/AFG3L2/SLC30A1	57
P20	GO:0006753	nucleoside phosphate metabolic process	52/337	170/3116	2.79536e-13	2.05537e-11	1.89055e-11	ATP1B1/PDHX/DNM1L/NDUFS4/NDUFB3/NDUFS5/OPA1/NDUFS2/NDUFB1/NDUFS3/ALDH1L1/ATP5PD/ATP5MG/NDUFB4/NDUFA7/NDUFC2/NDUFA10/NDUFB10/MYH3/MYH6/MYH8/NDUFB7/GPD1/ATP5PB/NDUFS1/ATP5PO/NDUFV1/HSD17B4/NDUFA8/ATP5MF/ATP5ME/NDUFA6/OGDH/DLG1/NNT/NDUFA5/GUK1/NDUFA9/HSD17B12/GPD1L/TECR/NDUFA13/SUCLA2/TJP2/NDUFA12/SLC25A13/STOML2/ACSL6/FIS1/ENTPD2/MYH4/NDUFB9	52
P20	GO:0009117	nucleotide metabolic process	51/337	166/3116	4.03587e-13	2.88728e-11	2.65575e-11	ATP1B1/PDHX/DNM1L/NDUFS4/NDUFB3/NDUFS5/OPA1/NDUFS2/NDUFB1/NDUFS3/ALDH1L1/ATP5PD/ATP5MG/NDUFB4/NDUFA7/NDUFC2/NDUFA10/NDUFB10/MYH3/MYH6/MYH8/NDUFB7/GPD1/ATP5PB/NDUFS1/ATP5PO/NDUFV1/HSD17B4/NDUFA8/ATP5MF/ATP5ME/NDUFA6/OGDH/DLG1/NNT/NDUFA5/GUK1/NDUFA9/HSD17B12/GPD1L/TECR/NDUFA13/SUCLA2/TJP2/NDUFA12/SLC25A13/STOML2/ACSL6/FIS1/MYH4/NDUFB9	51
P20	GO:0006811	monoatomic ion transport	66/337	257/3116	1.24357e-12	8.66244e-11	7.9678e-11	ATP1B1/ATP6AP1/SLC3A2/FXYD1/DNM1L/NDUFA4/ATP2A1/PGRMC2/ABCC4/ATP6V1G1/SLC25A12/ATP5PD/ATP5MG/LETM1/ITGB3/SLC25A5/PRKCB/FYN/CYC1/SLC25A4/COX4I1/CYBA/ATP2A2/GJA1/KEL/ATP5PB/MAOB/HTR2C/UQCRC1/SLC19A1/SLC1A3/SLC1A4/VDAC2/UQCRFS1/ATP5PO/ATP5MF/ATP5ME/SLC25A3/CDK5/PLP2/DLG1/NNT/MLC1/NDUFA9/ATP6V1F/CYBRD1/SLC47A2/GPD1L/PIEZO1/ATP6V0A1/PHB2/SFXN3/FXYD6/SLC25A22/SFXN1/TRPV4/ABCB6/SLC17A7/UQCR10/SLC24A2/SL…	66
P20	GO:0009152	purine ribonucleotide biosynthetic process	33/337	84/3116	4.40425e-12	2.98924e-10	2.74954e-10	PDHX/NDUFS4/NDUFB3/NDUFS5/NDUFS2/NDUFB1/NDUFS3/ATP5PD/ATP5MG/NDUFB4/NDUFA7/NDUFC2/NDUFA10/NDUFB10/NDUFB7/ATP5PB/NDUFS1/ATP5PO/NDUFV1/NDUFA8/ATP5MF/ATP5ME/NDUFA6/NDUFA5/NDUFA9/HSD17B12/TECR/NDUFA13/NDUFA12/SLC25A13/STOML2/ACSL6/NDUFB9	33
P20	GO:0098660	inorganic ion transmembrane transport	51/337	178/3116	8.23638e-12	5.45042e-10	5.01335e-10	ATP1B1/ATP6AP1/SLC3A2/FXYD1/NDUFA4/ATP2A1/ATP6V1G1/SLC25A12/ATP5PD/ATP5MG/LETM1/ITGB3/SLC25A5/FYN/CYC1/SLC25A4/COX4I1/CYBA/ATP2A2/RHCE/KEL/ATP5PB/HTR2C/UQCRC1/SLC1A3/SLC1A4/UQCRFS1/ATP5PO/ATP5MF/ATP5ME/SLC25A3/RHAG/SLC25A11/DLG1/NNT/ATP6V1F/SLC47A2/GPD1L/ATP6V0A1/PHB2/FXYD6/SLC25A22/TRPV4/ABCB6/SLC17A7/UQCR10/SLC24A2/SLC25A13/SLC8A2/AFG3L2/SLC30A1	51
P20	GO:0055086	nucleobase-containing small molecule metabolic process	53/337	190/3116	9.62771e-12	6.21575e-10	5.71731e-10	ATP1B1/TTR/PDHX/DNM1L/NDUFS4/NDUFB3/NDUFS5/OPA1/NDUFS2/NDUFB1/NDUFS3/ALDH1L1/ATP5PD/ATP5MG/NDUFB4/NDUFA7/NDUFC2/NDUFA10/NDUFB10/MYH3/MYH6/MYH8/NDUFB7/GPD1/ATP5PB/NDUFS1/ATP5PO/NDUFV1/HSD17B4/NDUFA8/ATP5MF/ATP5ME/NDUFA6/OGDH/DLG1/NNT/NDUFA5/GUK1/NDUFA9/HSD17B12/GPD1L/TECR/NDUFA13/SUCLA2/TJP2/NDUFA12/SLC25A13/STOML2/ACSL6/FIS1/ENTPD2/MYH4/NDUFB9	53
P20	GO:0071705	nitrogen compound transport	94/337	454/3116	1.02592e-11	6.46572e-10	5.94724e-10	APOD/ATP1B1/ATP6AP1/CLU/FGA/FGB/FGG/GNPTG/PLTP/SLC3A2/SNAP23/DNM1L/C2CD2L/AP3D1/HGS/PGRMC2/ABCC4/SYNGR1/TOM1/MTX2/RP2/SLC25A12/MYO1D/ITGB3/SLC25A5/PRKCB/FYN/SLC25A4/SLC25A6/CD36/GJA1/ADCYAP1/RHCE/GNAZ/MAOB/HTR2C/GNA11/SLC19A1/SLC1A3/SLC1A4/SYK/TMED10/XK/ABAT/CDK5/SLC7A5/RHAG/SLC25A11/CD47/PPID/STX4/SLC14A1/AP3B2/GPM6B/SNX1/CKAP5/MVP/MLC1/RAB35/LLGL1/STX1A/RUFY3/SLC44A2/SVIP/SLC16A10/NUP133/SLC44A…	94
P20	GO:0006164	purine nucleotide biosynthetic process	34/337	91/3116	1.09558e-11	6.74417e-10	6.20336e-10	PDHX/NDUFS4/NDUFB3/NDUFS5/NDUFS2/NDUFB1/NDUFS3/ATP5PD/ATP5MG/NDUFB4/NDUFA7/NDUFC2/NDUFA10/NDUFB10/NDUFB7/ATP5PB/NDUFS1/ATP5PO/NDUFV1/NDUFA8/ATP5MF/ATP5ME/NDUFA6/NDUFA5/GUK1/NDUFA9/HSD17B12/TECR/NDUFA13/NDUFA12/SLC25A13/STOML2/ACSL6/NDUFB9	34
P20	GO:0098662	inorganic cation transmembrane transport	49/337	170/3116	1.76131e-11	1.05959e-09	9.74619e-10	ATP1B1/ATP6AP1/SLC3A2/FXYD1/NDUFA4/ATP2A1/ATP6V1G1/SLC25A12/ATP5PD/ATP5MG/LETM1/ITGB3/SLC25A5/FYN/CYC1/SLC25A4/COX4I1/CYBA/ATP2A2/RHCE/KEL/ATP5PB/HTR2C/UQCRC1/SLC1A3/UQCRFS1/ATP5PO/ATP5MF/ATP5ME/SLC25A3/RHAG/DLG1/NNT/ATP6V1F/SLC47A2/GPD1L/ATP6V0A1/PHB2/FXYD6/SLC25A22/TRPV4/ABCB6/SLC17A7/UQCR10/SLC24A2/SLC25A13/SLC8A2/AFG3L2/SLC30A1	49
P20	GO:0009260	ribonucleotide biosynthetic process	33/337	88/3116	2.00449e-11	1.17908e-09	1.08453e-09	PDHX/NDUFS4/NDUFB3/NDUFS5/NDUFS2/NDUFB1/NDUFS3/ATP5PD/ATP5MG/NDUFB4/NDUFA7/NDUFC2/NDUFA10/NDUFB10/NDUFB7/ATP5PB/NDUFS1/ATP5PO/NDUFV1/NDUFA8/ATP5MF/ATP5ME/NDUFA6/NDUFA5/NDUFA9/HSD17B12/TECR/NDUFA13/NDUFA12/SLC25A13/STOML2/ACSL6/NDUFB9	33
P20	GO:0098655	monoatomic cation transmembrane transport	48/337	171/3116	8.27658e-11	4.76263e-09	4.38072e-09	ATP1B1/ATP6AP1/SLC3A2/FXYD1/NDUFA4/ATP2A1/ATP6V1G1/SLC25A12/ATP5PD/ATP5MG/LETM1/ITGB3/SLC25A5/FYN/CYC1/SLC25A4/COX4I1/CYBA/ATP2A2/KEL/ATP5PB/HTR2C/UQCRC1/SLC1A3/UQCRFS1/ATP5PO/ATP5MF/ATP5ME/SLC25A3/DLG1/NNT/ATP6V1F/SLC47A2/GPD1L/PIEZO1/ATP6V0A1/PHB2/FXYD6/SLC25A22/TRPV4/ABCB6/SLC17A7/UQCR10/SLC24A2/SLC25A13/SLC8A2/AFG3L2/SLC30A1	48
P20	GO:0046390	ribose phosphate biosynthetic process	33/337	93/3116	1.14636e-10	6.45622e-09	5.93849e-09	PDHX/NDUFS4/NDUFB3/NDUFS5/NDUFS2/NDUFB1/NDUFS3/ATP5PD/ATP5MG/NDUFB4/NDUFA7/NDUFC2/NDUFA10/NDUFB10/NDUFB7/ATP5PB/NDUFS1/ATP5PO/NDUFV1/NDUFA8/ATP5MF/ATP5ME/NDUFA6/NDUFA5/NDUFA9/HSD17B12/TECR/NDUFA13/NDUFA12/SLC25A13/STOML2/ACSL6/NDUFB9	33
P20	GO:0072522	purine-containing compound biosynthetic process	34/337	98/3116	1.19712e-10	6.60163e-09	6.07224e-09	PDHX/NDUFS4/NDUFB3/NDUFS5/NDUFS2/NDUFB1/NDUFS3/ATP5PD/ATP5MG/NDUFB4/NDUFA7/NDUFC2/NDUFA10/NDUFB10/NDUFB7/ATP5PB/NDUFS1/ATP5PO/NDUFV1/NDUFA8/ATP5MF/ATP5ME/NDUFA6/NDUFA5/GUK1/NDUFA9/HSD17B12/TECR/NDUFA13/NDUFA12/SLC25A13/STOML2/ACSL6/NDUFB9	34
P20	GO:0019637	organophosphate metabolic process	62/337	258/3116	1.52922e-10	8.26093e-09	7.59849e-09	ATP1B1/ENPP2/PDHX/DNM1L/NDUFS4/NDUFB3/NDUFS5/OPA1/NDUFS2/NDUFB1/NDUFS3/ALDH1L1/ATP5PD/ATP5MG/NDUFB4/NDUFA7/NDUFC2/NDUFA10/CDS2/NDUFB10/CKM/MYH3/MYH6/MYH8/NDUFB7/GPD1/ATP5PB/NDUFS1/HTR2C/GPD2/ATP5PO/NDUFV1/HSD17B4/NDUFA8/ATP5MF/ATP5ME/NDUFA6/OGDH/DLG1/NNT/NDUFA5/GUK1/NDUFA9/HSD17B12/SLC44A2/GPD1L/PIP4K2C/SLC44A1/PHB2/SACM1L/TECR/NDUFA13/SUCLA2/TJP2/NDUFA12/SLC25A13/STOML2/ACSL6/FIS1/ENTPD2/MYH4/ND…	62
P20	GO:0009165	nucleotide biosynthetic process	34/337	99/3116	1.64684e-10	8.54741e-09	7.862e-09	PDHX/NDUFS4/NDUFB3/NDUFS5/NDUFS2/NDUFB1/NDUFS3/ATP5PD/ATP5MG/NDUFB4/NDUFA7/NDUFC2/NDUFA10/NDUFB10/NDUFB7/ATP5PB/NDUFS1/ATP5PO/NDUFV1/NDUFA8/ATP5MF/ATP5ME/NDUFA6/NDUFA5/GUK1/NDUFA9/HSD17B12/TECR/NDUFA13/NDUFA12/SLC25A13/STOML2/ACSL6/NDUFB9	34
P20	GO:1901293	nucleoside phosphate biosynthetic process	34/337	99/3116	1.64684e-10	8.54741e-09	7.862e-09	PDHX/NDUFS4/NDUFB3/NDUFS5/NDUFS2/NDUFB1/NDUFS3/ATP5PD/ATP5MG/NDUFB4/NDUFA7/NDUFC2/NDUFA10/NDUFB10/NDUFB7/ATP5PB/NDUFS1/ATP5PO/NDUFV1/NDUFA8/ATP5MF/ATP5ME/NDUFA6/NDUFA5/GUK1/NDUFA9/HSD17B12/TECR/NDUFA13/NDUFA12/SLC25A13/STOML2/ACSL6/NDUFB9	34
P20	GO:0006812	monoatomic cation transport	55/337	224/3116	8.51359e-10	4.33374e-08	3.98622e-08	ATP1B1/ATP6AP1/SLC3A2/FXYD1/DNM1L/NDUFA4/ATP2A1/PGRMC2/ATP6V1G1/SLC25A12/ATP5PD/ATP5MG/LETM1/ITGB3/SLC25A5/PRKCB/FYN/CYC1/SLC25A4/COX4I1/CYBA/ATP2A2/KEL/ATP5PB/HTR2C/UQCRC1/SLC1A3/UQCRFS1/ATP5PO/ATP5MF/ATP5ME/SLC25A3/CDK5/DLG1/NNT/NDUFA9/ATP6V1F/CYBRD1/SLC47A2/GPD1L/PIEZO1/ATP6V0A1/PHB2/FXYD6/SLC25A22/SFXN1/TRPV4/ABCB6/SLC17A7/UQCR10/SLC24A2/SLC25A13/SLC8A2/AFG3L2/SLC30A1	55
P20	GO:0007006	mitochondrial membrane organization	17/337	31/3116	1.65652e-09	8.27323e-08	7.6098e-08	OPA1/MTX2/LETM1/SLC25A5/SLC25A4/SLC25A6/VDAC2/IMMT/MICOS10/CHCHD6/APOO/TOMM22/CHCHD3/NDUFA13/AFG3L2/SAMM50/MTCH2	17
P20	GO:0015711	organic anion transport	27/337	75/3116	4.33538e-09	2.09763e-07	1.92943e-07	SLC3A2/ABCC4/SLC25A12/SLC25A5/SLC25A4/SLC25A6/CD36/GJA1/SLC19A1/SLC1A3/SLC1A4/SYK/XK/ABAT/SLC7A5/RHAG/SLC25A11/CD47/SLC16A10/SFXN3/SLC25A22/SFXN1/GLTP/SLC17A7/SLC25A13/ABCG2/FIS1	27
P20	GO:0044281	small molecule metabolic process	92/337	488/3116	4.35852e-09	2.09763e-07	1.92943e-07	APOD/ATP1B1/PLTP/TTR/CARNS1/PDHX/DNM1L/MGST3/NDUFS4/NDUFB3/IDH3B/NDUFS5/OPA1/NDUFS2/NDUFB1/NDUFS3/SLC25A12/ALDH1L1/ATP5PD/ATP5MG/ERLIN2/GLS/NDUFB4/NDUFA7/NDUFC2/NDUFA10/DDAH2/NDUFB10/FGF1/PRKCB/MYH3/MYH6/MYH8/GLUL/CD36/NDUFB7/GPD1/ATP5PB/NDUFS1/ALDH4A1/PRKAR2B/SPR/SLC19A1/SLC1A3/GPD2/SYK/ASPA/ATP5PO/ACADVL/NDUFV1/IDH3G/GALK1/HSD17B4/NDUFA8/HADHB/ATP5MF/ATP5ME/NDUFA6/ABAT/OGDH/SLC25A11/LIPE/DLG1/N…	92
P20	GO:0090407	organophosphate biosynthetic process	41/337	149/3116	4.46089e-09	2.10856e-07	1.93948e-07	PDHX/NDUFS4/NDUFB3/NDUFS5/NDUFS2/NDUFB1/NDUFS3/ATP5PD/ATP5MG/NDUFB4/NDUFA7/NDUFC2/NDUFA10/CDS2/NDUFB10/CKM/NDUFB7/ATP5PB/NDUFS1/HTR2C/ATP5PO/NDUFV1/NDUFA8/ATP5MF/ATP5ME/NDUFA6/NDUFA5/GUK1/NDUFA9/HSD17B12/SLC44A2/PIP4K2C/SLC44A1/SACM1L/TECR/NDUFA13/NDUFA12/SLC25A13/STOML2/ACSL6/NDUFB9	41
P20	GO:0007007	inner mitochondrial membrane organization	11/337	14/3116	5.49192e-09	2.55037e-07	2.34586e-07	OPA1/MTX2/LETM1/IMMT/MICOS10/CHCHD6/APOO/CHCHD3/NDUFA13/AFG3L2/SAMM50	11
P20	GO:1903825	organic acid transmembrane transport	14/337	27/3116	1.24771e-07	5.59776e-06	5.14887e-06	SLC3A2/SLC25A12/CD36/SLC19A1/SLC1A3/SLC1A4/SLC7A5/SLC25A11/SLC16A10/SFXN3/SLC25A22/SFXN1/SLC17A7/SLC25A13	14
P20	GO:1905039	carboxylic acid transmembrane transport	14/337	27/3116	1.24771e-07	5.59776e-06	5.14887e-06	SLC3A2/SLC25A12/CD36/SLC19A1/SLC1A3/SLC1A4/SLC7A5/SLC25A11/SLC16A10/SFXN3/SLC25A22/SFXN1/SLC17A7/SLC25A13	14
P20	GO:0006887	exocytosis	29/337	98/3116	1.74474e-07	7.6972e-06	7.07996e-06	FGA/FGB/FGG/SNAP23/HGS/ABCC4/SEPTIN4/SYNGR1/SYNGR2/CLASP2/PRKCG/PRKCB/RALA/RALB/ATP2A2/SYK/TMED10/S100A10/CDK5/STX4/LLGL1/STX1A/SYN2/SEPTIN5/SRCIN1/DNAJC5/LIN7C/RAB21/CADPS	29
P20	GO:0140352	export from cell	52/337	238/3116	1.86741e-07	8.10334e-06	7.45354e-06	AGT/ATP1B1/FGA/FGB/FGG/SNAP23/FXYD1/DNM1L/C2CD2L/HGS/ABCC4/SEPTIN4/SYNGR1/SYNGR2/CLASP2/PRKCG/PRKCB/RALA/RALB/ATP2A2/GJA1/ADCYAP1/GNAZ/MAOB/HTR2C/GNA11/SYK/TMED10/S100A10/ABAT/CDK5/PPID/STX4/DLG1/LLGL1/STX1A/SLC47A2/SLC16A10/MYO18A/SYN2/SEPTIN5/SRCIN1/DNAJC5/SLC25A22/TRPV4/LIN7C/MYOF/RAB21/CADPS/ABCG2/SLC8A2/SLC30A1	52
P20	GO:0006865	amino acid transport	14/337	28/3116	2.25359e-07	9.62138e-06	8.84984e-06	SLC3A2/SLC25A12/GJA1/SLC1A3/SLC1A4/XK/ABAT/SLC7A5/SLC16A10/SFXN3/SLC25A22/SFXN1/SLC17A7/SLC25A13	14
P20	GO:0003333	amino acid transmembrane transport	11/337	18/3116	3.20611e-07	1.34707e-05	1.23905e-05	SLC3A2/SLC25A12/SLC1A3/SLC1A4/SLC7A5/SLC16A10/SFXN3/SLC25A22/SFXN1/SLC17A7/SLC25A13	11
P20	GO:0051649	establishment of localization in cell	86/337	489/3116	5.11327e-07	2.11482e-05	1.94523e-05	APOD/ATP1B1/ATP6AP1/CLU/GNPTG/SNAP23/C2CD2L/DYNC1I1/AP3D1/HGS/ATP2A1/ABCC4/SYNGR1/OPA1/TOM1/CLASP2/ATP6V1G1/MTX2/MYO1D/ITGB3/PRKCG/SLC25A5/PRKCB/FYN/RALA/SLC25A4/SLC25A6/CYBA/ATP2A2/CD36/GJA1/KEL/MAPK3/MAP2K2/SYK/VDAC2/TMED10/CDK5/STX4/DLG1/SLC14A1/AP3B2/GPM6B/PICALM/SNX1/MLC1/RAB35/LLGL1/STX1A/ATP6V1F/TBC1D10B/CYBRD1/RSPH4A/LAMTOR1/RUFY3/SIRT2/SVIP/NUP133/SYN2/ARHGEF2/ATP6V0A1/PHB2/SEPTIN5/DPY30…	86
P20	GO:0061024	membrane organization	49/337	226/3116	5.71337e-07	2.32624e-05	2.1397e-05	ATP1B1/CLU/PLTP/SNAP23/DNM1L/C2CD2L/AP3D1/HGS/SYNGR1/SYNGR2/OPA1/TOM1/MTX2/BANF1/LETM1/SLC25A5/PRKCB/SLC25A4/SLC25A6/ATP2A2/CD36/PRKCA/VDAC2/TMED10/S100A10/DLG4/STX4/DLG1/AP3B2/PICALM/STX1A/IMMT/MICOS10/SIRT2/ATL1/MYO18A/CHCHD6/ESYT1/APOO/SH3GLB2/TOMM22/TMEM30A/CHCHD3/GLTP/MYOF/NDUFA13/AFG3L2/SAMM50/MTCH2	49
P20	GO:0015849	organic acid transport	21/337	61/3116	5.88811e-07	2.32624e-05	2.1397e-05	SLC3A2/ABCC4/SLC25A12/CD36/GJA1/SLC19A1/SLC1A3/SLC1A4/SYK/XK/ABAT/SLC7A5/SLC25A11/SLC16A10/SFXN3/SLC25A22/SFXN1/SLC17A7/SLC25A13/ABCG2/FIS1	21
P20	GO:0046942	carboxylic acid transport	21/337	61/3116	5.88811e-07	2.32624e-05	2.1397e-05	SLC3A2/ABCC4/SLC25A12/CD36/GJA1/SLC19A1/SLC1A3/SLC1A4/SYK/XK/ABAT/SLC7A5/SLC25A11/SLC16A10/SFXN3/SLC25A22/SFXN1/SLC17A7/SLC25A13/ABCG2/FIS1	21
P20	GO:0042886	amide transport	26/337	87/3116	6.32178e-07	2.46084e-05	2.26351e-05	FGA/FGB/FGG/PLTP/C2CD2L/SLC25A12/PRKCB/GJA1/ADCYAP1/GNAZ/HTR2C/GNA11/SLC19A1/SLC1A3/SLC1A4/ABAT/STX4/SLC14A1/STX1A/SLC16A10/SLC25A22/TRPV4/GLTP/SLC17A7/SLC25A13/ABCG2	26
P20	GO:0023061	signal release	31/337	120/3116	1.80392e-06	6.92027e-05	6.36533e-05	AGT/FGA/FGB/FGG/SNAP23/C2CD2L/ABCC4/PRKCG/PRKCB/ATP2A2/GJA1/ADCYAP1/GNAZ/MAOB/HTR2C/GNA11/SYK/ABAT/CDK5/STX4/STX1A/SLC16A10/SYN2/SEPTIN5/DNAJC5/SLC25A22/TRPV4/LIN7C/MYOF/CADPS/SLC30A1	31
P20	GO:0006836	neurotransmitter transport	19/337	55/3116	1.94704e-06	7.36259e-05	6.77218e-05	SNAP23/ITGB3/PRKCG/PRKCB/ATP2A2/SLC1A3/CDK5/STX4/GPM6B/STX1A/SYN2/SEPTIN5/SLC29A1/DNAJC5/LIN7C/MYOF/SLC17A7/CADPS/SLC30A1	19
P20	GO:0046903	secretion	50/337	242/3116	2.02357e-06	7.5442e-05	6.93923e-05	AGT/FGA/FGB/FGG/SNAP23/DNM1L/C2CD2L/HGS/ABCC4/SEPTIN4/SYNGR1/SYNGR2/CLASP2/PRKCG/PRKCB/RALA/RALB/CYBA/ATP2A2/GJA1/ADCYAP1/GNAZ/MAOB/HTR2C/GNA11/SYK/TMED10/S100A10/ABAT/CDK5/PPID/STX4/LLGL1/STX1A/SLC16A10/MYO18A/SYN2/SEPTIN5/SLC29A1/SRCIN1/DNAJC5/PTGES2/SLC25A22/TRPV4/LIN7C/MYOF/RAB21/CADPS/MYO6/SLC30A1	50
P20	GO:1901264	carbohydrate derivative transport	9/337	14/3116	2.23648e-06	8.22218e-05	7.56284e-05	PLTP/ABCC4/SLC25A5/SLC25A4/SLC25A6/SLC19A1/CD47/SLC29A1/GLTP	9
P20	GO:1903530	regulation of secretion by cell	35/337	146/3116	2.52531e-06	9.15683e-05	8.42254e-05	AGT/FGA/FGB/FGG/DNM1L/C2CD2L/HGS/SEPTIN4/CLASP2/PRKCG/PRKCB/RALA/ATP2A2/GJA1/ADCYAP1/GNAZ/MAOB/HTR2C/GNA11/SYK/TMED10/S100A10/ABAT/CDK5/PPID/STX4/LLGL1/STX1A/MYO18A/SEPTIN5/SLC25A22/MYOF/RAB21/CADPS/SLC30A1	35
P20	GO:0051046	regulation of secretion	37/337	159/3116	2.75968e-06	9.87145e-05	9.07985e-05	AGT/FGA/FGB/FGG/DNM1L/C2CD2L/HGS/SEPTIN4/CLASP2/PRKCG/PRKCB/RALA/CYBA/ATP2A2/GJA1/ADCYAP1/GNAZ/MAOB/HTR2C/GNA11/SYK/TMED10/S100A10/ABAT/CDK5/PPID/STX4/LLGL1/STX1A/MYO18A/SEPTIN5/SLC25A22/MYOF/RAB21/CADPS/MYO6/SLC30A1	37
P20	GO:0032940	secretion by cell	46/337	221/3116	4.44221e-06	0.00015678	0.000144208	AGT/FGA/FGB/FGG/SNAP23/DNM1L/C2CD2L/HGS/ABCC4/SEPTIN4/SYNGR1/SYNGR2/CLASP2/PRKCG/PRKCB/RALA/RALB/ATP2A2/GJA1/ADCYAP1/GNAZ/MAOB/HTR2C/GNA11/SYK/TMED10/S100A10/ABAT/CDK5/PPID/STX4/LLGL1/STX1A/SLC16A10/MYO18A/SYN2/SEPTIN5/SRCIN1/DNAJC5/SLC25A22/TRPV4/LIN7C/MYOF/RAB21/CADPS/SLC30A1	46
P20	GO:0015804	neutral amino acid transport	8/337	12/3116	5.79464e-06	0.000201821	0.000185637	SLC3A2/SLC25A12/SLC1A3/SLC1A4/SLC7A5/SFXN3/SFXN1/SLC25A13	8
P20	GO:0030048	actin filament-based movement	16/337	45/3116	8.42646e-06	0.000289673	0.000266444	DSC2/SHTN1/ATP2A1/MYO1D/MYL1/MYH3/MYH6/MYH8/ATP2A2/GJA1/DLG1/GPD1L/MYH2/MYO6/MYO5A/MYH4	16
P20	GO:0015807	L-amino acid transport	9/337	16/3116	1.04766e-05	0.000355534	0.000327023	SLC3A2/SLC25A12/SLC1A3/SLC1A4/SLC7A5/SLC25A22/SFXN1/SLC17A7/SLC25A13	9
P20	GO:0017157	regulation of exocytosis	18/337	58/3116	2.0182e-05	0.000676225	0.000621998	FGA/FGB/FGG/HGS/SEPTIN4/CLASP2/PRKCG/PRKCB/RALA/ATP2A2/SYK/S100A10/CDK5/STX4/STX1A/SEPTIN5/RAB21/CADPS	18
P20	GO:0001505	regulation of neurotransmitter levels	17/337	54/3116	2.79611e-05	0.000910008	0.000837035	SNAP23/ITGB3/PRKCG/PRKCB/ATP2A2/SLC1A3/CDK5/GPM6B/STX1A/SYN2/SEPTIN5/SLC29A1/DNAJC5/LIN7C/MYOF/CADPS/SLC30A1	17
P20	GO:0001539	cilium or flagellum-dependent cell motility	8/337	14/3116	2.88782e-05	0.000910008	0.000837035	PLTP/SEPTIN4/RSPH4A/TEKT1/RSPH9/LZTFL1/DNAH9/VDAC3	8
P20	GO:0060285	cilium-dependent cell motility	8/337	14/3116	2.88782e-05	0.000910008	0.000837035	PLTP/SEPTIN4/RSPH4A/TEKT1/RSPH9/LZTFL1/DNAH9/VDAC3	8
P20	GO:0060294	cilium movement involved in cell motility	8/337	14/3116	2.88782e-05	0.000910008	0.000837035	PLTP/SEPTIN4/RSPH4A/TEKT1/RSPH9/LZTFL1/DNAH9/VDAC3	8
P20	GO:1902475	L-alpha-amino acid transmembrane transport	8/337	14/3116	2.88782e-05	0.000910008	0.000837035	SLC3A2/SLC25A12/SLC1A3/SLC1A4/SLC7A5/SLC25A22/SLC17A7/SLC25A13	8
P20	GO:0070252	actin-mediated cell contraction	13/337	35/3116	3.54488e-05	0.00110392	0.00101539	DSC2/SHTN1/ATP2A1/MYL1/MYH3/MYH6/MYH8/ATP2A2/GJA1/DLG1/GPD1L/MYH2/MYH4	13
P20	GO:0015740	C4-dicarboxylate transport	7/337	11/3116	3.65985e-05	0.00112647	0.00103614	SLC25A12/SLC1A3/SLC1A4/ABAT/SLC25A11/SLC25A22/SLC25A13	7
P20	GO:0006835	dicarboxylic acid transport	10/337	23/3116	6.03703e-05	0.00183679	0.00168949	SLC25A12/GJA1/SLC19A1/SLC1A3/SLC1A4/ABAT/SLC25A11/SLC25A22/SLC17A7/SLC25A13	10
P20	GO:0140115	export across plasma membrane	9/337	19/3116	6.28361e-05	0.00189008	0.00173851	ATP1B1/FXYD1/ABCC4/GJA1/DLG1/SLC47A2/ABCG2/SLC8A2/SLC30A1	9
P20	GO:0098771	inorganic ion homeostasis	29/337	130/3116	8.11876e-05	0.0023956	0.0022035	AGT/ATP1B1/ATP6AP1/ATP2A1/ATP6V1G1/LETM1/ITGB3/PRKCB/CYBA/ATP2A2/RHCE/KEL/CD40/HTR2C/SLC1A3/XK/RHAG/PICALM/IMMT/CYBRD1/TRPV4/ABCB6/SLC17A7/SLC24A2/STOML2/SLC8A2/FIS1/AFG3L2/SLC30A1	29
P20	GO:0009914	hormone transport	20/337	75/3116	8.14523e-05	0.0023956	0.0022035	AGT/FGA/FGB/FGG/SLC3A2/SNAP23/C2CD2L/PRKCB/GJA1/ADCYAP1/GNAZ/HTR2C/GNA11/ABAT/SLC7A5/STX4/STX1A/SLC16A10/SLC25A22/TRPV4	20
P20	GO:0003013	circulatory system process	34/337	164/3116	9.54719e-05	0.00277708	0.00255438	AGT/ATP1B1/DSC2/FGA/FGB/FGG/FXYD1/DNM1L/ATP2A1/ABCC4/FYN/MYH6/ATP2A2/CD36/GJA1/KEL/GNA11/SLC19A1/STAT1/SLC1A3/SLC1A4/ABAT/SLC7A5/DLG1/GNA13/GPD1L/SLC44A1/SLC29A1/TRPV4/MYOF/TJP2/ABCG2/SLC8A2/SNX5	34
P20	GO:0003341	cilium movement	8/337	16/3116	0.000101717	0.0028951	0.00266294	PLTP/SEPTIN4/RSPH4A/TEKT1/RSPH9/LZTFL1/DNAH9/VDAC3	8
P20	GO:0015800	acidic amino acid transport	8/337	16/3116	0.000101717	0.0028951	0.00266294	SLC25A12/GJA1/SLC1A3/SLC1A4/ABAT/SLC25A22/SLC17A7/SLC25A13	8
P20	GO:0015748	organophosphate ester transport	11/337	29/3116	0.000115351	0.00321405	0.00295631	PLTP/C2CD2L/ABCC4/SLC25A5/SLC25A4/SLC25A6/SLC19A1/CD47/ESYT1/TMEM30A/GLTP	11
P20	GO:0045921	positive regulation of exocytosis	11/337	29/3116	0.000115351	0.00321405	0.00295631	FGA/FGB/FGG/HGS/CLASP2/SYK/S100A10/CDK5/STX4/STX1A/CADPS	11
P20	GO:0051049	regulation of transport	73/337	455/3116	0.000137504	0.00379139	0.00348735	AGT/APOD/ATP1B1/CLU/FGA/FGB/FGG/PLTP/SIRPB1/FXYD1/DNM1L/NDUFA4/C2CD2L/HGS/ATP2A1/SEPTIN4/CLASP2/ITGB3/PRKCG/SLC25A5/PRKCB/FYN/RALA/SLC25A4/SLC25A6/CYBA/ATP2A2/CD36/GJA1/ADCYAP1/GNAZ/KEL/PRTN3/MAOB/MAPK3/HTR2C/GNA11/FCER1G/MAP2K2/SYK/TMED10/S100A10/DLG4/ABAT/CDK5/SLC7A5/CD47/PPID/STX4/DLG1/GPM6B/PICALM/MLC1/LLGL1/STX1A/LAMTOR1/RUFY3/GPD1L/SVIP/MYO18A/PHB2/SEPTIN5/FXYD6/DNAJC5/SLC25A22/TMEM30A/MYOF…	73
P20	GO:0006873	intracellular monoatomic ion homeostasis	29/337	135/3116	0.000166096	0.00453253	0.00416907	ATP1B1/ATP6AP1/ATP2A1/ATP6V1G1/LETM1/ITGB3/PRKCB/CYBA/ATP2A2/KEL/CD40/MAPK3/HTR2C/SLC1A3/XK/RHAG/PICALM/ATP6V1F/IMMT/CYBRD1/ATP6V0A1/TRPV4/ABCB6/SLC24A2/STOML2/SLC8A2/FIS1/AFG3L2/SLC30A1	29
P20	GO:0098739	import across plasma membrane	13/337	40/3116	0.000174304	0.00470798	0.00433045	ATP1B1/SLC3A2/FYN/CD36/SLC19A1/SLC1A3/SLC1A4/SLC7A5/DLG1/TRPV4/SLC24A2/SLC8A2/SLC30A1	13
P20	GO:0010232	vascular transport	10/337	26/3116	0.000207904	0.00550322	0.00506192	ABCC4/CD36/SLC19A1/SLC1A3/SLC1A4/SLC7A5/SLC44A1/SLC29A1/ABCG2/SLC8A2	10
P20	GO:0150104	transport across blood-brain barrier	10/337	26/3116	0.000207904	0.00550322	0.00506192	ABCC4/CD36/SLC19A1/SLC1A3/SLC1A4/SLC7A5/SLC44A1/SLC29A1/ABCG2/SLC8A2	10
P20	GO:0006874	intracellular calcium ion homeostasis	19/337	74/3116	0.000212304	0.00556404	0.00511786	ATP1B1/ATP2A1/LETM1/ITGB3/PRKCB/CYBA/ATP2A2/KEL/CD40/HTR2C/XK/IMMT/TRPV4/SLC24A2/STOML2/SLC8A2/FIS1/AFG3L2/SLC30A1	19
P20	GO:0051938	L-glutamate import	6/337	10/3116	0.000220482	0.00572173	0.00526291	SLC25A12/SLC1A3/SLC1A4/SLC25A22/SLC17A7/SLC25A13	6
P20	GO:0055080	monoatomic cation homeostasis	30/337	145/3116	0.00026003	0.00668251	0.00614664	AGT/ATP1B1/ATP6AP1/ATP2A1/ATP6V1G1/LETM1/ITGB3/PRKCB/CYBA/ATP2A2/KEL/CD40/MAPK3/HTR2C/SLC1A3/XK/RHAG/PICALM/ATP6V1F/IMMT/CYBRD1/ATP6V0A1/TRPV4/ABCB6/SLC24A2/STOML2/SLC8A2/FIS1/AFG3L2/SLC30A1	30
P20	GO:0030003	intracellular monoatomic cation homeostasis	28/337	132/3116	0.000270441	0.00688325	0.00633128	ATP1B1/ATP6AP1/ATP2A1/ATP6V1G1/LETM1/ITGB3/PRKCB/CYBA/ATP2A2/KEL/CD40/MAPK3/HTR2C/SLC1A3/XK/PICALM/ATP6V1F/IMMT/CYBRD1/ATP6V0A1/TRPV4/ABCB6/SLC24A2/STOML2/SLC8A2/FIS1/AFG3L2/SLC30A1	28
P20	GO:0050801	monoatomic ion homeostasis	30/337	147/3116	0.00033474	0.00843864	0.00776194	AGT/ATP1B1/ATP6AP1/ATP2A1/ATP6V1G1/LETM1/ITGB3/PRKCB/CYBA/ATP2A2/KEL/CD40/MAPK3/HTR2C/SLC1A3/XK/RHAG/PICALM/ATP6V1F/IMMT/CYBRD1/ATP6V0A1/TRPV4/ABCB6/SLC24A2/STOML2/SLC8A2/FIS1/AFG3L2/SLC30A1	30
P20	GO:0051640	organelle localization	28/337	134/3116	0.000352549	0.00880375	0.00809778	SNAP23/DNM1L/DYNC1I1/AP3D1/HGS/ATP2A1/OPA1/CLASP2/MYO1D/RALB/ATP2A2/GJA1/SYK/TMED10/CDK5/STX4/DLG1/AP3B2/PICALM/LLGL1/STX1A/LAMTOR1/SIRT2/SYN2/SEPTIN5/ESYT1/MYO6/MYO5A	28
P20	GO:0046879	hormone secretion	18/337	71/3116	0.000369132	0.00913171	0.00839944	AGT/FGA/FGB/FGG/SNAP23/C2CD2L/PRKCB/GJA1/ADCYAP1/GNAZ/HTR2C/GNA11/ABAT/STX4/STX1A/SLC16A10/SLC25A22/TRPV4	18
P20	GO:0007269	neurotransmitter secretion	13/337	43/3116	0.000391481	0.00950688	0.00874452	SNAP23/PRKCG/PRKCB/ATP2A2/CDK5/STX1A/SYN2/SEPTIN5/DNAJC5/LIN7C/MYOF/CADPS/SLC30A1	13
P20	GO:0099643	signal release from synapse	13/337	43/3116	0.000391481	0.00950688	0.00874452	SNAP23/PRKCG/PRKCB/ATP2A2/CDK5/STX1A/SYN2/SEPTIN5/DNAJC5/LIN7C/MYOF/CADPS/SLC30A1	13
P20	GO:0046883	regulation of hormone secretion	15/337	54/3116	0.000395574	0.00951895	0.00875563	AGT/FGA/FGB/FGG/C2CD2L/PRKCB/GJA1/ADCYAP1/GNAZ/HTR2C/GNA11/ABAT/STX4/STX1A/SLC25A22	15
P20	GO:0055082	intracellular chemical homeostasis	34/337	177/3116	0.000448356	0.0106287	0.00977638	ATP1B1/ATP6AP1/C2CD2L/ATP2A1/ATP6V1G1/GLS/LETM1/ITGB3/PRKCB/CYBA/ATP2A2/KEL/CD40/MAPK3/HTR2C/SLC1A3/XK/RHAG/STX4/NNT/PICALM/ATP6V1F/IMMT/CYBRD1/ATP6V0A1/SLC29A1/TRPV4/ABCB6/SLC24A2/STOML2/SLC8A2/FIS1/AFG3L2/SLC30A1	34
P20	GO:0051648	vesicle localization	14/337	49/3116	0.000449722	0.0106287	0.00977638	SNAP23/DYNC1I1/AP3D1/HGS/CLASP2/MYO1D/TMED10/CDK5/AP3B2/PICALM/SYN2/SEPTIN5/MYO6/MYO5A	14
P20	GO:0051650	establishment of vesicle localization	13/337	44/3116	0.000502393	0.0116652	0.0107298	SNAP23/DYNC1I1/AP3D1/HGS/CLASP2/MYO1D/TMED10/CDK5/AP3B2/PICALM/SEPTIN5/MYO6/MYO5A	13
P20	GO:0090276	regulation of peptide hormone secretion	13/337	44/3116	0.000502393	0.0116652	0.0107298	FGA/FGB/FGG/C2CD2L/PRKCB/ADCYAP1/GNAZ/HTR2C/GNA11/ABAT/STX4/STX1A/SLC25A22	13
P20	GO:0006936	muscle contraction	19/337	79/3116	0.00052556	0.0119927	0.011031	ATP1B1/DSC2/FXYD1/ATP2A1/MYL1/MYH3/MYH1/MYH6/MYH8/ATP2A2/GJA1/ABAT/DLG1/GPD1L/TRPV4/MYOF/MYH2/MYH13/MYH4	19
P20	GO:0055074	calcium ion homeostasis	19/337	79/3116	0.00052556	0.0119927	0.011031	ATP1B1/ATP2A1/LETM1/ITGB3/PRKCB/CYBA/ATP2A2/KEL/CD40/HTR2C/XK/IMMT/TRPV4/SLC24A2/STOML2/SLC8A2/FIS1/AFG3L2/SLC30A1	19
P20	GO:0098656	monoatomic anion transmembrane transport	8/337	20/3116	0.000673484	0.0152369	0.014015	FXYD1/ABCC4/SLC19A1/SLC1A3/SLC1A4/VDAC2/SLC17A7/VDAC3	8
P20	GO:0015031	protein transport	58/337	360/3116	0.000691847	0.0155197	0.0142751	APOD/ATP1B1/ATP6AP1/CLU/FGA/FGB/FGG/GNPTG/SNAP23/DNM1L/C2CD2L/AP3D1/HGS/SYNGR1/TOM1/MTX2/RP2/MYO1D/PRKCB/FYN/CD36/ADCYAP1/GNAZ/GNA11/SYK/TMED10/ABAT/CDK5/PPID/STX4/AP3B2/GPM6B/SNX1/MVP/MLC1/RAB35/LLGL1/STX1A/RUFY3/SVIP/NUP133/MYO18A/ARHGEF2/PHB2/SLC25A22/RAB18/TOMM22/LIN7C/TMEM30A/NDUFA13/RAB21/CADPS/MYO6/FIS1/MYO5A/SAMM50/SNX5/MTCH2	58
P20	GO:0001508	action potential	11/337	35/3116	0.000763715	0.0169878	0.0156256	ATP1B1/DSC2/ATP2A2/CD36/GJA1/GNA11/GNAQ/CNTNAP1/DLG1/GPD1L/SLC8A2	11
P20	GO:0051047	positive regulation of secretion	21/337	94/3116	0.000780374	0.0172138	0.0158334	FGA/FGB/FGG/DNM1L/C2CD2L/HGS/CLASP2/PRKCB/CYBA/ADCYAP1/GNA11/SYK/TMED10/S100A10/ABAT/CDK5/PPID/STX4/STX1A/MYO18A/CADPS	21
P20	GO:0002791	regulation of peptide secretion	13/337	46/3116	0.000805214	0.0176149	0.0162023	FGA/FGB/FGG/C2CD2L/PRKCB/ADCYAP1/GNAZ/HTR2C/GNA11/ABAT/STX4/STX1A/SLC25A22	13
P20	GO:1903532	positive regulation of secretion by cell	20/337	88/3116	0.000824136	0.0178811	0.0164472	FGA/FGB/FGG/DNM1L/C2CD2L/HGS/CLASP2/PRKCB/ADCYAP1/GNA11/SYK/TMED10/S100A10/ABAT/CDK5/PPID/STX4/STX1A/MYO18A/CADPS	20
P20	GO:1901135	carbohydrate derivative metabolic process	55/337	340/3116	0.000877412	0.0188822	0.017368	ATP1B1/GNPTG/PDHX/DNM1L/NDUFS4/NDUFB3/NDUFS5/OPA1/NDUFS2/NDUFB1/NDUFS3/ATP5PD/ATP5MG/NDUFB4/NDUFA7/NDUFC2/NDUFA10/NDUFB10/RPN1/MYH3/MYH6/MYH8/NDUFB7/GPD1/ATP5PB/NDUFS1/DDOST/GPD2/ATP5PO/NDUFV1/HSD17B4/NDUFA8/ATP5MF/ATP5ME/NDUFA6/OGDH/DLG1/NDUFA5/GUK1/NDUFA9/HSD17B12/GPD1L/SCCPDH/TECR/GLTP/NDUFA13/SUCLA2/TJP2/NDUFA12/SLC25A13/STOML2/ACSL6/FIS1/MYH4/NDUFB9	55
P20	GO:0065003	protein-containing complex assembly	64/337	411/3116	0.000913704	0.0195046	0.0179406	CLU/FGA/FGB/FGG/LAMC1/SNAP23/DNM1L/NDUFS4/NDUFB3/NDUFS5/OPA1/CLASP2/NDUFS2/NDUFB1/NDUFS3/GLS/NDUFB4/LETM1/NDUFC2/NDUFA10/NDUFB10/RALB/CYBA/COX7A2/CD36/NDUFB7/CD40/NDUFS1/SYK/VDAC2/RPS5/UQCRFS1/TMED10/NDUFA8/NDUFA6/RPL23A/DLG4/PPID/SSRP1/STX4/DLG1/PICALM/CKAP5/LLGL1/STX1A/NDUFA5/NDUFA9/INF2/HP1BP3/RSPH4A/SIRT2/SVIP/ATL1/PIEZO1/RSPH9/TRPV4/ANLN/NDUFAF4/NDUFA13/NDUFA12/STOML2/MAPRE3/SAMM50/NDUFB9	64
P20	GO:0010256	endomembrane system organization	29/337	149/3116	0.000954831	0.0200034	0.0183994	ATP6AP1/CLU/SHTN1/SNAP23/AP3D1/HGS/SYNGR1/SYNGR2/TOM1/CLASP2/BANF1/PRKCB/ATP2A2/PRKCA/MAPK3/MAP2K2/TMED10/S100A10/STX4/STX1A/ATP6V1F/LAMTOR1/SIRT2/ATL1/MYO18A/ATP6V0A1/ESYT1/RAB18/MYOF	29
P20	GO:0045184	establishment of protein localization	61/337	388/3116	0.000955971	0.0200034	0.0183994	APOD/ATP1B1/ATP6AP1/CLU/FGA/FGB/FGG/GNPTG/SNAP23/DNM1L/C2CD2L/AP3D1/HGS/SYNGR1/TOM1/MTX2/RP2/MYO1D/PRKCB/FYN/RAP2A/RALA/CD36/ADCYAP1/GNAZ/GNA11/SYK/TMED10/DLG4/ABAT/CDK5/PPID/STX4/AP3B2/GPM6B/SNX1/MVP/MLC1/RAB35/LLGL1/STX1A/RUFY3/SVIP/NUP133/MYO18A/ARHGEF2/PHB2/SLC25A22/RAB18/TOMM22/LIN7C/TMEM30A/NDUFA13/RAB21/CADPS/MYO6/FIS1/MYO5A/SAMM50/SNX5/MTCH2	61
P20	GO:0099003	vesicle-mediated transport in synapse	20/337	89/3116	0.000959742	0.0200034	0.0183994	ATP6AP1/SNAP23/AP3D1/ATP6V1G1/ITGB3/PRKCG/PRKCB/RALA/ATP2A2/CDK5/AP3B2/PICALM/STX1A/ATP6V1F/SYN2/ATP6V0A1/SEPTIN5/DNAJC5/SLC17A7/CADPS	20
P20	GO:0003012	muscle system process	22/337	102/3116	0.000974256	0.0201473	0.0185317	AGT/ATP1B1/DSC2/FXYD1/ATP2A1/MYL1/MYH3/MYH1/CYBA/MYH6/MYH8/ATP2A2/PRKCA/GJA1/ABAT/DLG1/GPD1L/TRPV4/MYOF/MYH2/MYH13/MYH4	22
P20	GO:0006839	mitochondrial transport	11/337	36/3116	0.000995428	0.0204256	0.0187876	MTX2/SLC25A5/SLC25A4/SLC25A6/VDAC2/TOMM22/NDUFA13/SLC25A13/FIS1/SAMM50/MTCH2	11
P20	GO:0090087	regulation of peptide transport	13/337	47/3116	0.00100658	0.0204956	0.0188521	FGA/FGB/FGG/C2CD2L/PRKCB/ADCYAP1/GNAZ/HTR2C/GNA11/ABAT/STX4/STX1A/SLC25A22	13
P20	GO:0060627	regulation of vesicle-mediated transport	33/337	178/3116	0.0010499	0.0211272	0.019433	CLU/FGA/FGB/FGG/SIRPB1/HGS/SEPTIN4/CLASP2/ITGB3/PRKCG/PRKCB/RALA/CYBA/ATP2A2/CD36/PRTN3/MAPK3/FCER1G/MAP2K2/SYK/S100A10/DLG4/CDK5/CD47/STX4/PICALM/STX1A/MYO18A/SEPTIN5/DNAJC5/SLC17A7/RAB21/CADPS	33
P20	GO:0099504	synaptic vesicle cycle	18/337	77/3116	0.00105356	0.0211272	0.019433	ATP6AP1/SNAP23/AP3D1/ATP6V1G1/PRKCG/PRKCB/ATP2A2/CDK5/AP3B2/PICALM/STX1A/ATP6V1F/SYN2/ATP6V0A1/SEPTIN5/DNAJC5/SLC17A7/CADPS	18
P20	GO:0090277	positive regulation of peptide hormone secretion	9/337	26/3116	0.00106566	0.0212091	0.0195083	FGA/FGB/FGG/C2CD2L/PRKCB/ADCYAP1/GNA11/ABAT/STX4	9
P20	GO:0030072	peptide hormone secretion	15/337	59/3116	0.00109889	0.0217072	0.0199665	FGA/FGB/FGG/C2CD2L/PRKCB/ADCYAP1/GNAZ/HTR2C/GNA11/ABAT/STX4/STX1A/SLC16A10/SLC25A22/TRPV4	15
P20	GO:0045055	regulated exocytosis	16/337	66/3116	0.00131497	0.0257831	0.0237155	SNAP23/ABCC4/SYNGR1/SYNGR2/PRKCG/PRKCB/ATP2A2/SYK/TMED10/CDK5/STX4/STX1A/SYN2/SEPTIN5/DNAJC5/CADPS	16
P20	GO:0099518	vesicle cytoskeletal trafficking	6/337	13/3116	0.00135607	0.0263935	0.024277	DYNC1I1/AP3D1/MYO1D/AP3B2/MYO6/MYO5A	6
P20	GO:1901137	carbohydrate derivative biosynthetic process	37/337	210/3116	0.00140889	0.0272214	0.0250385	PDHX/NDUFS4/NDUFB3/NDUFS5/NDUFS2/NDUFB1/NDUFS3/ATP5PD/ATP5MG/NDUFB4/NDUFA7/NDUFC2/NDUFA10/NDUFB10/RPN1/NDUFB7/ATP5PB/NDUFS1/DDOST/ATP5PO/NDUFV1/NDUFA8/ATP5MF/ATP5ME/NDUFA6/NDUFA5/GUK1/NDUFA9/HSD17B12/SCCPDH/TECR/NDUFA13/NDUFA12/SLC25A13/STOML2/ACSL6/NDUFB9	37
P20	GO:0016192	vesicle-mediated transport	65/337	426/3116	0.00144542	0.0275939	0.0253811	ATP6AP1/CLU/ENPP2/FGA/FGB/FGG/SIRPB1/SNAP23/DNM1L/AP3D1/HGS/ABCC4/SEPTIN4/SYNGR1/SYNGR2/TOM1/CLASP2/ATP6V1G1/RP2/MYO1D/ITGB3/PRKCG/PRKCB/FYN/RALA/RALB/CYBA/ATP2A2/CD36/PRTN3/MAPK3/FCER1G/MAP2K2/SYK/TMED10/S100A10/DLG4/CDK5/CD47/STX4/AP3B2/PICALM/SNX1/MLC1/RAB35/LLGL1/STX1A/ATP6V1F/TBC1D10B/LAMTOR1/MYO18A/SYN2/ATP6V0A1/SEPTIN5/DPY30/SRCIN1/DNAJC5/LIN7C/OCIAD1/SLC17A7/RAB21/CADPS/MYO6/MYO5A/SNX5	65
P20	GO:0002793	positive regulation of peptide secretion	9/337	27/3116	0.00144902	0.0275939	0.0253811	FGA/FGB/FGG/C2CD2L/PRKCB/ADCYAP1/GNA11/ABAT/STX4	9
P20	GO:0099536	synaptic signaling	37/337	211/3116	0.00154136	0.0291427	0.0268057	CDH11/CDH8/SNAP23/SYNGR1/GLS/PRKCG/PRKCB/FYN/ATP2A2/PTPRA/MAPK3/HTR2C/GNA11/PRKAR2B/SLC1A3/SLC1A4/GNAQ/DLG4/ABAT/CDK5/STX4/DLG1/PLCL1/STX1A/CAMKV/SYN2/SEPTIN5/SLC29A1/DNAJC5/LIN7C/MYOF/SLC17A7/SLC24A2/CADPS/SLC8A2/PHF24/SLC30A1	37
P20	GO:0002790	peptide secretion	15/337	61/3116	0.00158717	0.029796	0.0274067	FGA/FGB/FGG/C2CD2L/PRKCB/ADCYAP1/GNAZ/HTR2C/GNA11/ABAT/STX4/STX1A/SLC16A10/SLC25A22/TRPV4	15
P20	GO:0010817	regulation of hormone levels	24/337	120/3116	0.00177635	0.0331126	0.0304573	AGT/FGA/FGB/FGG/SLC3A2/SNAP23/C2CD2L/PRKCB/GJA1/ADCYAP1/GNAZ/HTR2C/GNA11/HSD17B4/ABAT/SLC7A5/LIPE/STX4/STX1A/HSD17B12/SLC16A10/SLC25A22/TRPV4/DHRS7	24
P20	GO:0003018	vascular process in circulatory system	17/337	75/3116	0.00207169	0.038348	0.0352729	AGT/FGA/FGB/FGG/ABCC4/CD36/KEL/SLC19A1/SLC1A3/SLC1A4/SLC7A5/SLC44A1/SLC29A1/TRPV4/TJP2/ABCG2/SLC8A2	17
P20	GO:0050714	positive regulation of protein secretion	12/337	45/3116	0.00221117	0.0406456	0.0373862	FGA/FGB/FGG/DNM1L/C2CD2L/PRKCB/GNA11/TMED10/ABAT/PPID/STX4/MYO18A	12
P20	GO:0042391	regulation of membrane potential	20/337	95/3116	0.00224477	0.0407064	0.0374422	ATP1B1/DSC2/FXYD1/ATP2A2/CD36/GJA1/NDUFS1/GNA11/GNAQ/DLG4/CNTNAP1/ABAT/CDK5/DLG1/NNT/STX1A/GPD1L/PIEZO1/SLC29A1/SLC8A2	20
P20	GO:0015833	peptide transport	15/337	63/3116	0.00224523	0.0407064	0.0374422	FGA/FGB/FGG/C2CD2L/PRKCB/ADCYAP1/GNAZ/HTR2C/GNA11/ABAT/STX4/STX1A/SLC16A10/SLC25A22/TRPV4	15
P20	GO:0007019	microtubule depolymerization	5/337	10/3116	0.00228486	0.0411429	0.0378437	CLASP2/CKAP5/ARHGEF2/MAP6D1/TRPV4	5
P20	GO:0007268	chemical synaptic transmission	35/337	201/3116	0.00234246	0.041614	0.038277	CDH11/CDH8/SNAP23/SYNGR1/GLS/PRKCG/PRKCB/FYN/ATP2A2/PTPRA/MAPK3/HTR2C/PRKAR2B/SLC1A3/SLC1A4/DLG4/ABAT/CDK5/STX4/DLG1/PLCL1/STX1A/CAMKV/SYN2/SEPTIN5/SLC29A1/DNAJC5/LIN7C/MYOF/SLC17A7/SLC24A2/CADPS/SLC8A2/PHF24/SLC30A1	35
P20	GO:0098916	anterograde trans-synaptic signaling	35/337	201/3116	0.00234246	0.041614	0.038277	CDH11/CDH8/SNAP23/SYNGR1/GLS/PRKCG/PRKCB/FYN/ATP2A2/PTPRA/MAPK3/HTR2C/PRKAR2B/SLC1A3/SLC1A4/DLG4/ABAT/CDK5/STX4/DLG1/PLCL1/STX1A/CAMKV/SYN2/SEPTIN5/SLC29A1/DNAJC5/LIN7C/MYOF/SLC17A7/SLC24A2/CADPS/SLC8A2/PHF24/SLC30A1	35
P20	GO:0050708	regulation of protein secretion	16/337	70/3116	0.00254221	0.0448615	0.0412641	FGA/FGB/FGG/DNM1L/C2CD2L/PRKCB/GNAZ/GNA11/TMED10/ABAT/PPID/STX4/LLGL1/STX1A/MYO18A/SLC25A22	16
P20	GO:0015844	monoamine transport	7/337	19/3116	0.00258522	0.0453185	0.0416844	ITGB3/PRKCB/MAOB/SYK/ABAT/GPM6B/STX1A	7
P20	GO:0099537	trans-synaptic signaling	35/337	203/3116	0.00278658	0.0485268	0.0446354	CDH11/CDH8/SNAP23/SYNGR1/GLS/PRKCG/PRKCB/FYN/ATP2A2/PTPRA/MAPK3/HTR2C/PRKAR2B/SLC1A3/SLC1A4/DLG4/ABAT/CDK5/STX4/DLG1/PLCL1/STX1A/CAMKV/SYN2/SEPTIN5/SLC29A1/DNAJC5/LIN7C/MYOF/SLC17A7/SLC24A2/CADPS/SLC8A2/PHF24/SLC30A1	35
Seer	GO:0006396	RNA processing	83/985	152/3116	1.50395e-09	4.6427e-06	4.58785e-06	APLP1/RTCA/NOP56/PRMT5/DHX15/HNRNPR/NUDT21/RRP9/DKC1/SF3B1/NPM3/SNRNP200/RSL1D1/ZRANB2/SNRPA/SNRPC/HNRNPL/RPL35A/U2AF2/CSTF2/EIF4A3/NOP2/RPL14/CLNS1A/ADAR/EIF6/RPS13/SNRPF/LSM6/SNRPD1/SNRPD3/TRA2B/RPS21/RBM3/SRSF2/SRSF11/KHDRBS1/NSUN2/HNRNPA0/SRSF9/PABPC4/CIRBP/SAFB2/NOLC1/EFTUD2/KARS1/NONO/RNPS1/SF3B3/SF3A2/SF3A1/TSN/SF1/CPSF6/TUT7/PHF5A/CCAR2/TDRD7/TAF15/DDX17/ISG20/DCPS/DAZAP1/TSNAX/PRMT1/WDR7…	83
Seer	GO:0022613	ribonucleoprotein complex biogenesis	64/985	113/3116	1.90557e-08	2.94125e-05	2.9065e-05	HSP90AB1/EIF3F/NOP56/PRMT5/XPO1/EIF3D/NUDT21/RRP9/DKC1/EIF5B/SF3B1/NPM3/SNRNP200/EIF3G/RSL1D1/SNRPC/RPL35A/EIF2S2/RPL10/EIF4A3/EIF2S3/NOP2/EIF1AX/RPL14/CLNS1A/EIF5/ADAR/EIF3B/EIF6/ABCE1/RPS15A/RPS23/RPS13/RPS11/SNRPF/LSM6/SNRPD1/SNRPD3/RPS21/SRSF9/EIF3I/CUL4A/CUL4B/NOLC1/SF3B3/SF3A2/SF3A1/SF1/CPSF6/PHF5A/DDX17/ISG20/WDR77/EIF2A/WDR12/PUF60/AGO2/MCTS1/PRPF19/PIN4/EIF3L/NOP58/LSM2/STRAP	64
Seer	GO:0016071	mRNA metabolic process	67/985	124/3116	1.09556e-07	0.000112733	0.000111401	APLP1/PRMT5/DHX15/HNRNPR/NUDT21/DKC1/SF3B1/SNRNP200/ZRANB2/SNRPA/SNRPC/HNRNPL/GSPT1/YBX3/U2AF2/CSTF2/EIF4A3/CLNS1A/ADAR/SNRPF/LSM6/SNRPD1/SNRPD3/ETF1/TRA2B/RBM3/SRSF2/SRSF11/KHDRBS1/NSUN2/HNRNPA0/SRSF9/PABPC4/CIRBP/SAFB2/CAPRIN1/EFTUD2/NONO/RNPS1/SF3B3/SF3A2/SF3A1/SF1/ELAVL1/CPSF6/TUT7/SND1/PHF5A/CCAR2/TAF15/DDX17/DCPS/DAZAP1/WDR77/PYM1/RPRD1B/DNAJB11/PUF60/RALY/ACIN1/AGO2/PRPF19/SRRM2/THRAP3/LSM…	67
Seer	GO:0006397	mRNA processing	53/985	93/3116	2.53993e-07	0.000196019	0.000193703	APLP1/PRMT5/DHX15/HNRNPR/NUDT21/SF3B1/SNRNP200/ZRANB2/SNRPA/SNRPC/HNRNPL/U2AF2/CSTF2/EIF4A3/CLNS1A/ADAR/SNRPF/LSM6/SNRPD1/SNRPD3/TRA2B/RBM3/SRSF2/SRSF11/KHDRBS1/HNRNPA0/SRSF9/CIRBP/SAFB2/EFTUD2/NONO/RNPS1/SF3B3/SF3A2/SF3A1/SF1/CPSF6/PHF5A/CCAR2/DDX17/DCPS/DAZAP1/WDR77/RPRD1B/PUF60/RALY/ACIN1/PRPF19/SRRM2/THRAP3/LSM2/STRAP/RBM8A	53
Seer	GO:0043687	post-translational protein modification	68/985	131/3116	6.6447e-07	0.000410244	0.000405396	HSP90AB1/UBA6/EIF3F/PSMD14/PRMT5/KDM6B/RNF40/SF3B1/PSMD10/HERC2/BAG2/ACTL6A/ISG15/UCHL3/RPS2/U2AF2/DEK/RANGAP1/ARRB1/HCFC1/UBE2M/UBE2K/COPS2/UFM1/WDR5/UBE2I/UBXN1/GPS1/AIMP2/OS9/SQSTM1/HDAC1/NAE1/CUL1/CUL2/CUL3/CUL4A/CUL4B/ELOC/HERC1/DDB1/UBR4/YOD1/RNF123/COPS6/CARM1/UBA3/COPS5/USP9X/USP7/CUL5/DCUN1D1/COPS8/UBAC1/COPS4/UBE2O/FN3K/FN3KRP/ATG3/SAE1/UBA2/COPS7A/PADI4/PRPF19/UBQLN1/COPS3/FBXO7/USP15	68
Seer	GO:0032446	protein modification by small protein conjugation	52/985	96/3116	2.78329e-06	0.00143201	0.00141509	HSP90AB1/UBA6/RNF40/PSMD10/HERC2/BAG2/ISG15/UCHL3/RPS2/U2AF2/RANGAP1/ARRB1/UBE2M/UBE2K/COPS2/UFM1/UBE2I/UBXN1/GPS1/AIMP2/OS9/SQSTM1/NAE1/CUL1/CUL2/CUL3/CUL4A/CUL4B/ELOC/HERC1/DDB1/UBR4/RNF123/COPS6/UBA3/COPS5/USP9X/USP7/CUL5/DCUN1D1/COPS8/UBAC1/COPS4/UBE2O/ATG3/SAE1/UBA2/COPS7A/PRPF19/UBQLN1/COPS3/FBXO7	52
Seer	GO:0070647	protein modification by small protein conjugation or removal	56/985	106/3116	3.27219e-06	0.00144304	0.00142599	HSP90AB1/UBA6/EIF3F/PSMD14/RNF40/PSMD10/HERC2/BAG2/ISG15/UCHL3/RPS2/U2AF2/RANGAP1/ARRB1/UBE2M/UBE2K/COPS2/UFM1/UBE2I/UBXN1/GPS1/AIMP2/OS9/SQSTM1/NAE1/CUL1/CUL2/CUL3/CUL4A/CUL4B/ELOC/HERC1/DDB1/UBR4/YOD1/RNF123/COPS6/UBA3/COPS5/USP9X/USP7/CUL5/DCUN1D1/COPS8/UBAC1/COPS4/UBE2O/ATG3/SAE1/UBA2/COPS7A/PRPF19/UBQLN1/COPS3/FBXO7/USP15	56
Seer	GO:0008380	RNA splicing	48/985	91/3116	1.77068e-05	0.00683263	0.0067519	PRMT5/DHX15/HNRNPR/SF3B1/SNRNP200/ZRANB2/SNRPA/SNRPC/HNRNPL/U2AF2/EIF4A3/CLNS1A/RPS13/SNRPF/LSM6/SNRPD1/SNRPD3/TRA2B/RBM3/SRSF2/SRSF11/KHDRBS1/SRSF9/CIRBP/EFTUD2/NONO/RNPS1/SF3B3/SF3A2/SF3A1/SF1/PHF5A/CCAR2/TAF15/DDX17/DCPS/DAZAP1/PRMT1/WDR77/PUF60/RALY/ACIN1/PRPF19/SRRM2/THRAP3/LSM2/STRAP/RBM8A	48
Seer	GO:0022618	protein-RNA complex assembly	37/985	66/3116	2.86082e-05	0.00981261	0.00969668	HSP90AB1/EIF3F/PRMT5/EIF3D/NUDT21/SF3B1/SNRNP200/EIF3G/SNRPC/EIF2S2/RPL10/EIF2S3/NOP2/CLNS1A/EIF5/ADAR/EIF3B/EIF6/SNRPF/SNRPD1/SNRPD3/SRSF9/EIF3I/SF3B3/SF3A2/SF3A1/SF1/CPSF6/PHF5A/WDR77/PUF60/AGO2/MCTS1/PRPF19/EIF3L/LSM2/STRAP	37
Seer	GO:0009057	macromolecule catabolic process	135/985	327/3116	6.09514e-05	0.0165756	0.0163798	APOB/C4BPA/CLU/CPB2/CTSB/CTSD/CTSF/CTSL/GAA/GPLD1/HEXB/HSP90AB1/HSP90B1/IDS/LAMP2/RGMA/RNASET2/SERPINE2/TMEM132A/TPP1/UBA6/PSMD12/DFFA/PSMD14/XPO1/PSMD3/HNRNPR/TNFSF12/MAN1A2/SNX3/OGA/DKC1/CTSV/RNF40/LYPLA1/PSMD10/LYPLA2/HERC2/BAG2/BAG3/AIFM1/LDLR/ISG15/RNASE3/CDH1/IDE/GSPT1/UCHL3/YBX3/PSMA4/PSMB5/IDUA/AGL/TIMP3/LONP1/SPAM1/LIPA/EIF4A3/FEN1/PSMB10/PSMD8/ARRB1/PSMD4/GABARAPL2/UBE2K/LSM6/ETF1/UBE2I…	135
Seer	GO:0000377	RNA splicing, via transesterification reactions with bulged adenosine as nucleophile	40/985	75/3116	6.44338e-05	0.0165756	0.0163798	PRMT5/DHX15/HNRNPR/SF3B1/SNRNP200/SNRPA/SNRPC/HNRNPL/U2AF2/EIF4A3/CLNS1A/SNRPF/LSM6/SNRPD1/SNRPD3/TRA2B/RBM3/SRSF2/KHDRBS1/SRSF9/CIRBP/EFTUD2/RNPS1/SF3B3/SF3A2/SF3A1/SF1/PHF5A/DDX17/DCPS/DAZAP1/WDR77/PUF60/RALY/PRPF19/SRRM2/THRAP3/LSM2/STRAP/RBM8A	40
Seer	GO:0000398	mRNA splicing, via spliceosome	40/985	75/3116	6.44338e-05	0.0165756	0.0163798	PRMT5/DHX15/HNRNPR/SF3B1/SNRNP200/SNRPA/SNRPC/HNRNPL/U2AF2/EIF4A3/CLNS1A/SNRPF/LSM6/SNRPD1/SNRPD3/TRA2B/RBM3/SRSF2/KHDRBS1/SRSF9/CIRBP/EFTUD2/RNPS1/SF3B3/SF3A2/SF3A1/SF1/PHF5A/DDX17/DCPS/DAZAP1/WDR77/PUF60/RALY/PRPF19/SRRM2/THRAP3/LSM2/STRAP/RBM8A	40
Seer	GO:0000387	spliceosomal snRNP assembly	10/985	11/3116	7.58987e-05	0.018023	0.0178101	PRMT5/SNRPC/CLNS1A/SNRPF/SNRPD1/SNRPD3/WDR77/PRPF19/LSM2/STRAP	10
Seer	GO:0000375	RNA splicing, via transesterification reactions	40/985	76/3116	9.53578e-05	0.0210264	0.020778	PRMT5/DHX15/HNRNPR/SF3B1/SNRNP200/SNRPA/SNRPC/HNRNPL/U2AF2/EIF4A3/CLNS1A/SNRPF/LSM6/SNRPD1/SNRPD3/TRA2B/RBM3/SRSF2/KHDRBS1/SRSF9/CIRBP/EFTUD2/RNPS1/SF3B3/SF3A2/SF3A1/SF1/PHF5A/DDX17/DCPS/DAZAP1/WDR77/PUF60/RALY/PRPF19/SRRM2/THRAP3/LSM2/STRAP/RBM8A	40
Seer	GO:0071826	protein-RNA complex organization	37/985	69/3116	0.000104214	0.0214473	0.0211939	HSP90AB1/EIF3F/PRMT5/EIF3D/NUDT21/SF3B1/SNRNP200/EIF3G/SNRPC/EIF2S2/RPL10/EIF2S3/NOP2/CLNS1A/EIF5/ADAR/EIF3B/EIF6/SNRPF/SNRPD1/SNRPD3/SRSF9/EIF3I/SF3B3/SF3A2/SF3A1/SF1/CPSF6/PHF5A/WDR77/PUF60/AGO2/MCTS1/PRPF19/EIF3L/LSM2/STRAP	37
Seer	GO:0045116	protein neddylation	12/985	15/3116	0.000155663	0.0300333	0.0296784	UBE2M/COPS2/GPS1/NAE1/COPS6/UBA3/COPS5/DCUN1D1/COPS8/COPS4/COPS7A/COPS3	12
Seer	GO:0006413	translational initiation	23/985	38/3116	0.000206017	0.0374103	0.0369683	EIF3F/EIF3D/EIF5B/EIF3G/EIF2S1/EIF4E/TPR/EIF2S2/EIF4B/EIF2S3/EIF1AX/EIF5/EIF3B/EIF6/ABCE1/KHDRBS1/EIF3I/BZW1/COPS5/EIF2A/AGO2/MCTS1/EIF3L	23
Seer	GO:0034660	ncRNA metabolic process	45/985	91/3116	0.000242339	0.0415611	0.0410701	NOP56/RRP9/DKC1/NPM3/RSL1D1/EPRS1/HARS1/RPL35A/TARS1/EIF4A3/GARS1/IARS1/NOP2/QARS1/CARS1/RPL14/RARS1/YARS1/ADAR/MARS1/EIF6/TGFB2/LSM6/RPS21/NSUN2/NOLC1/KARS1/ELOC/TSN/TUT7/SND1/TDRD7/DDX17/ISG20/TSNAX/TRIR/WDR12/ELL3/OSGEP/FARSB/THUMPD1/LARS1/AGO2/PIN4/NOP58	45
Glyco	GO:0007169	transmembrane receptor protein tyrosine kinase signaling pathway	32/203	183/3116	1.05862e-07	0.000256397	0.00023479	AGT/CSF1/CTSD/DCN/EPHA4/FGFR1/GFRA2/IGFBP3/ADAMTS3/FLRT2/MPZL1/NGF/PIGR/IGF1R/MET/ITGA5/CD7/BMP2/CEACAM1/PDGFRA/ERBB3/LOX/EPHB3/PLAUR/PTPN12/PTPRJ/ERBB4/EFNB3/TMEM108/HHIP/FLRT1/FZD4	32
Glyco	GO:0006956	complement activation	15/203	54/3116	8.67455e-07	0.00105049	0.000961962	A2M/C1S/C2/C3/C5/C7/CD59/CFB/CFH/CFHR1/IGHA1/IGHA2/IGHG1/IGHG3/IGHG4	15
Glyco	GO:0098742	cell-cell adhesion via plasma-membrane adhesion molecules	22/203	113/3116	1.98505e-06	0.0016026	0.00146754	CADM3/CDH2/LRRC4B/NLGN1/PCDH9/SPARCL1/CEACAM5/ITGA5/BMP2/CEACAM1/MPZ/PTPRM/UNC5D/AMIGO1/PCDH19/ROBO4/CDHR5/LRRC4/TENM2/PCDHB11/PCDHGB7/PCDHGA9	22
Glyco	GO:0007167	enzyme-linked receptor protein signaling pathway	38/203	283/3116	6.80018e-06	0.00304475	0.00278816	AGT/CSF1/CTSD/DCN/DKK3/EPHA4/FGFR1/GFRA2/HSP90AB1/IGFBP3/WFIKKN2/ADAMTS3/FLRT2/AKAP3/MPZL1/NGF/PIGR/IGF1R/MET/ITGA5/CD7/BMP2/CEACAM1/PDGFRA/ERBB3/LOX/EPHB3/PLAUR/PTPN12/PTPRJ/BMPR2/ERBB4/EFNB3/TMEM108/PTPRU/HHIP/FLRT1/FZD4	38
Glyco	GO:0098609	cell-cell adhesion	42/203	328/3116	7.06293e-06	0.00304475	0.00278816	CADM3/CDH2/FGA/FGB/LRRC4B/NEGR1/NFASC/NLGN1/NRXN2/PCDH9/PLG/PRNP/SPARCL1/HLA-DQA1/CEACAM5/ITGA5/BMP2/CEACAM1/PDGFRA/CD33/NT5E/MPZ/PTPRM/EPHB3/ADAM8/GCNT1/PLAUR/TRIM29/EFNB3/UNC5D/AMIGO1/LILRB1/PCDH19/ROBO4/PTPRU/SEMA4D/CDHR5/LRRC4/TENM2/PCDHB11/PCDHGB7/PCDHGA9	42
Glyco	GO:0006955	immune response	55/203	482/3116	7.54272e-06	0.00304475	0.00278816	A2M/AMBP/C1S/C2/C3/C5/C7/CD14/CD59/CFB/CFH/CFHR1/CHGA/CSF1/ENPP2/F12/F2/FGA/FGB/GRN/IGHA1/IGHA2/IGHG1/IGHG3/IGHG4/PGLYRP2/PRNP/PTGDS/RNASET2/LILRA1/LILRB5/LY86/IL18BP/PIGR/HLA-DQA1/IGF1R/IL6R/CD7/CEACAM1/IFNAR1/CD33/CD79B/ADAM8/BST1/PTPRJ/SLC39A6/TRIM29/DCST1/ERAP2/BTN2A1/LILRA2/LILRB1/SEMA4D/ERAP1/TNFRSF11A	55
Glyco	GO:0050776	regulation of immune response	33/203	234/3116	1.06002e-05	0.00366766	0.00335858	A2M/AMBP/C1S/C2/C3/C5/C7/CD14/CD59/CFB/CFH/CFHR1/GRN/IGHA1/IGHA2/IGHG1/IGHG3/IGHG4/PGLYRP2/PRNP/PIGR/HLA-DQA1/CEACAM1/CD33/CD79B/ADAM8/PTPRJ/SLC39A6/DCST1/BTN2A1/LILRA2/LILRB1/ERAP1	33
Glyco	GO:0009617	response to bacterium	27/203	177/3116	1.7596e-05	0.00532718	0.00487825	C2/C3/CD14/CFB/CHGA/F2/FGA/FGB/GRN/IGHA1/IGHA2/IGHG1/IGHG3/IGHG4/PENK/PGLYRP2/LY86/IL18BP/IL6R/BMP2/ACE/IFNAR1/TNFRSF1A/LILRA2/LILRB1/ERAP1/TNFRSF11A	27
Glyco	GO:0006959	humoral immune response	19/203	107/3116	4.1006e-05	0.0108359	0.00992278	A2M/C1S/C2/C3/C5/C7/CD59/CFB/CFH/CFHR1/F2/FGA/FGB/IGHA1/IGHA2/IGHG1/IGHG3/IGHG4/BST1	19
Glyco	GO:0006958	complement activation, classical pathway	10/203	35/3116	4.80685e-05	0.0108359	0.00992278	C1S/C2/C3/C5/C7/IGHA1/IGHA2/IGHG1/IGHG3/IGHG4	10
Glyco	GO:0042327	positive regulation of phosphorylation	25/203	168/3116	5.70143e-05	0.0108359	0.00992278	AGT/C3/CSF1/ENPP2/EPHA4/F2/FGFR1/HSP90AB1/PRNP/NGF/IGF1R/MET/ITGA5/IL6R/BMP2/ACE/PDGFRA/TNFRSF1A/ERBB3/ADAM8/PLAUR/PTPRJ/ERBB4/SEMA4D/TNFRSF11A	25
Glyco	GO:0002253	activation of immune response	23/203	148/3116	5.77333e-05	0.0108359	0.00992278	A2M/C1S/C2/C3/C5/C7/CD14/CD59/CFB/CFH/CFHR1/IGHA1/IGHA2/IGHG1/IGHG3/IGHG4/PRNP/CEACAM1/CD79B/PTPRJ/SLC39A6/BTN2A1/LILRA2	23
Glyco	GO:0032101	regulation of response to external stimulus	38/203	310/3116	5.81616e-05	0.0108359	0.00992278	A2M/AGT/C3/C5/CD14/CFH/CSF1/EPHA4/F12/F2/FGA/FGB/FGFR1/GRN/PGLYRP2/PLG/SERPINC1/LY86/IGF1R/MET/IL6R/CEACAM1/PDGFRA/TNFRSF1A/NT5E/ADAM8/PLAUR/BST1/TPBG/BMPR2/SEMA3A/DCST1/LILRA2/LILRB1/SEMA4D/SEMA6B/ERAP1/TNFRSF11A	38
Glyco	GO:0007416	synapse assembly	16/203	86/3116	9.5598e-05	0.0144711	0.0132516	CDH2/LRRC4B/NEGR1/NLGN1/NRXN2/FLRT2/EPHB3/TPBG/ERBB4/EFNB3/AMIGO1/LGI2/LRTM2/SEMA4D/LRRC4/PCDHB11	16
Glyco	GO:0018108	peptidyl-tyrosine phosphorylation	16/203	86/3116	9.5598e-05	0.0144711	0.0132516	AGT/ENPP2/EPHA4/FGFR1/PRNP/IGF1R/ITGA5/IL6R/ACE/PDGFRA/TNFRSF1A/ERBB3/BST1/PTPRJ/ERBB4/SEMA4D	16
Glyco	GO:0018212	peptidyl-tyrosine modification	16/203	86/3116	9.5598e-05	0.0144711	0.0132516	AGT/ENPP2/EPHA4/FGFR1/PRNP/IGF1R/ITGA5/IL6R/ACE/PDGFRA/TNFRSF1A/ERBB3/BST1/PTPRJ/ERBB4/SEMA4D	16
Glyco	GO:0010562	positive regulation of phosphorus metabolic process	26/203	185/3116	0.000108596	0.0146122	0.0133808	AGT/C3/CSF1/ENPP2/EPHA4/F2/FGFR1/HSP90AB1/PRNP/NGF/IGF1R/MET/ITGA5/IL6R/BMP2/ACE/PDGFRA/TNFRSF1A/CD33/ERBB3/ADAM8/PLAUR/PTPRJ/ERBB4/SEMA4D/TNFRSF11A	26
Glyco	GO:0045937	positive regulation of phosphate metabolic process	26/203	185/3116	0.000108596	0.0146122	0.0133808	AGT/C3/CSF1/ENPP2/EPHA4/F2/FGFR1/HSP90AB1/PRNP/NGF/IGF1R/MET/ITGA5/IL6R/BMP2/ACE/PDGFRA/TNFRSF1A/CD33/ERBB3/ADAM8/PLAUR/PTPRJ/ERBB4/SEMA4D/TNFRSF11A	26
Glyco	GO:0050731	positive regulation of peptidyl-tyrosine phosphorylation	12/203	54/3116	0.000126795	0.0157951	0.0144641	AGT/ENPP2/EPHA4/PRNP/ITGA5/IL6R/ACE/TNFRSF1A/ERBB3/PTPRJ/ERBB4/SEMA4D	12
Glyco	GO:0050778	positive regulation of immune response	26/203	187/3116	0.000130431	0.0157951	0.0144641	A2M/C1S/C2/C3/C5/C7/CD14/CD59/CFB/CFH/CFHR1/IGHA1/IGHA2/IGHG1/IGHG3/IGHG4/PRNP/HLA-DQA1/CEACAM1/CD79B/ADAM8/PTPRJ/SLC39A6/BTN2A1/LILRA2/LILRB1	26
Glyco	GO:0040011	locomotion	44/203	394/3116	0.000137262	0.0158309	0.0144968	AGT/C5/CHGA/CSF1/DCN/ENPP2/EPHA4/FBLN1/FGFR1/GRN/IGFBP3/MCAM/PLG/FLRT2/IGF1R/MET/ITGA5/IL6R/BMP2/ACE/CEACAM1/PDGFRA/LOX/PTPRM/SST/ADAM8/GCNT1/PLAUR/BST1/PTPRJ/TPBG/BMPR2/SEMA3A/ERBB4/UNC5D/LRTM2/LRRC15/ROBO4/PTPRU/SEMA4D/SEMA6B/PLXNA1/FZD4/TNFRSF11A	44
Glyco	GO:0002455	humoral immune response mediated by circulating immunoglobulin	10/203	40/3116	0.000166324	0.0183108	0.0167677	C1S/C2/C3/C5/C7/IGHA1/IGHA2/IGHG1/IGHG3/IGHG4	10
Glyco	GO:0030334	regulation of cell migration	37/203	315/3116	0.000185609	0.0194566	0.017817	AGT/C5/CSF1/DCN/ENPP2/EPHA4/FGFR1/GRN/IGFBP3/MCAM/PLG/FLRT2/IGF1R/MET/ITGA5/IL6R/BMP2/ACE/CEACAM1/PDGFRA/PTPRM/SST/ADAM8/GCNT1/BST1/PTPRJ/BMPR2/SEMA3A/ERBB4/UNC5D/LRRC15/ROBO4/PTPRU/SEMA4D/SEMA6B/PLXNA1/FZD4	37
Glyco	GO:0002768	immune response-regulating cell surface receptor signaling pathway	15/203	82/3116	0.000193901	0.0194566	0.017817	CD14/IGHA1/IGHA2/IGHG1/IGHG3/IGHG4/PRNP/PIGR/CEACAM1/CD79B/PTPRJ/SLC39A6/BTN2A1/LILRA2/LILRB1	15
Glyco	GO:2000145	regulation of cell motility	38/203	328/3116	0.000200832	0.0194566	0.017817	AGT/C5/CSF1/DCN/ENPP2/EPHA4/FBLN1/FGFR1/GRN/IGFBP3/MCAM/PLG/FLRT2/IGF1R/MET/ITGA5/IL6R/BMP2/ACE/CEACAM1/PDGFRA/PTPRM/SST/ADAM8/GCNT1/BST1/PTPRJ/BMPR2/SEMA3A/ERBB4/UNC5D/LRRC15/ROBO4/PTPRU/SEMA4D/SEMA6B/PLXNA1/FZD4	38
Glyco	GO:0019229	regulation of vasoconstriction	6/203	15/3116	0.000216351	0.0201539	0.0184555	AGT/FGA/FGB/ACE/ECE1/BMPR2	6
Glyco	GO:0040012	regulation of locomotion	39/203	343/3116	0.000244491	0.0219317	0.0200835	AGT/C5/CSF1/DCN/ENPP2/EPHA4/FBLN1/FGFR1/GRN/IGFBP3/MCAM/PLG/FLRT2/IGF1R/MET/ITGA5/IL6R/BMP2/ACE/CEACAM1/PDGFRA/PTPRM/SST/ADAM8/GCNT1/BST1/PTPRJ/TPBG/BMPR2/SEMA3A/ERBB4/UNC5D/LRRC15/ROBO4/PTPRU/SEMA4D/SEMA6B/PLXNA1/FZD4	39
Glyco	GO:0002250	adaptive immune response	24/203	175/3116	0.000298969	0.0251211	0.0230042	C1S/C2/C3/C5/C7/FGA/FGB/IGHA1/IGHA2/IGHG1/IGHG3/IGHG4/LILRA1/LILRB5/IL18BP/HLA-DQA1/IL6R/CD7/CEACAM1/CD79B/ERAP2/LILRB1/ERAP1/TNFRSF11A	24
Glyco	GO:0001934	positive regulation of protein phosphorylation	22/203	154/3116	0.00030079	0.0251211	0.0230042	AGT/C3/CSF1/ENPP2/EPHA4/F2/FGFR1/HSP90AB1/PRNP/NGF/ITGA5/IL6R/BMP2/ACE/TNFRSF1A/ERBB3/ADAM8/PLAUR/PTPRJ/ERBB4/SEMA4D/TNFRSF11A	22
Glyco	GO:0044419	biological process involved in interspecies interaction between organisms	47/203	447/3116	0.000339854	0.0274376	0.0251254	A2M/C1S/C2/C3/C5/C7/CD14/CFB/CFH/CFHR1/CHGA/CSF1/F12/F2/FGA/FGB/GRN/HSP90AB1/IGHA1/IGHA2/IGHG1/IGHG3/IGHG4/NPC2/PENK/PGLYRP2/PLG/RNASET2/LY86/IL18BP/ITGA5/IL6R/BMP2/ACE/CEACAM1/ANPEP/IFNAR1/TNFRSF1A/ADAM8/TRIM29/EFNB3/DCST1/LILRA2/LILRB1/LRRC15/ERAP1/TNFRSF11A	47
Glyco	GO:0009607	response to biotic stimulus	42/203	388/3116	0.000406301	0.0311688	0.0285421	A2M/C1S/C2/C3/C5/C7/CD14/CFB/CFH/CFHR1/CHGA/CSF1/F12/F2/FGA/FGB/GRN/IGHA1/IGHA2/IGHG1/IGHG3/IGHG4/NPC2/PENK/PGLYRP2/RNASET2/LY86/IL18BP/IL6R/BMP2/ACE/CEACAM1/IFNAR1/TNFRSF1A/ADAM8/PTPRJ/TRIM29/DCST1/LILRA2/LILRB1/ERAP1/TNFRSF11A	42
Glyco	GO:0033674	positive regulation of kinase activity	16/203	97/3116	0.000411809	0.0311688	0.0285421	AGT/CSF1/EPHA4/F2/FGFR1/HSP90AB1/PRNP/IGF1R/MET/IL6R/ACE/PDGFRA/ERBB3/ADAM8/ERBB4/TNFRSF11A	16
Glyco	GO:0007173	epidermal growth factor receptor signaling pathway	7/203	23/3116	0.000448822	0.0320932	0.0293886	AGT/PIGR/CEACAM1/PLAUR/PTPN12/PTPRJ/ERBB4	7
Glyco	GO:0098542	defense response to other organism	35/203	305/3116	0.000450523	0.0320932	0.0293886	A2M/C1S/C2/C3/C5/C7/CD14/CFB/CFH/CFHR1/CHGA/CSF1/F12/F2/FGA/FGB/GRN/IGHA1/IGHA2/IGHG1/IGHG3/IGHG4/PGLYRP2/RNASET2/LY86/IL6R/CEACAM1/IFNAR1/TNFRSF1A/ADAM8/TRIM29/DCST1/LILRA2/LILRB1/ERAP1	35
Glyco	GO:0048858	cell projection morphogenesis	30/203	248/3116	0.000495137	0.0342635	0.0313761	APLP1/CDH2/ENPP2/EPHA4/HSP90AB1/NFASC/NLGN1/FLRT2/CSPG5/NGF/IGF1R/PTPRM/ECE1/EPHB3/TPBG/BMPR2/SEMA3A/EFNB3/TMEM108/UNC5D/AMIGO1/ENAH/LRTM2/ROBO4/SEMA4D/SEMA6B/FLRT1/PLXNA1/FZD4/UST	30
Glyco	GO:0050851	antigen receptor-mediated signaling pathway	11/203	54/3116	0.000545024	0.036668	0.0335779	IGHA1/IGHA2/IGHG1/IGHG3/IGHG4/PRNP/CEACAM1/CD79B/PTPRJ/SLC39A6/BTN2A1	11
Glyco	GO:0061098	positive regulation of protein tyrosine kinase activity	5/203	12/3116	0.000606853	0.037087	0.0339616	AGT/EPHA4/PRNP/ACE/ERBB3	5
Glyco	GO:0042325	regulation of phosphorylation	30/203	251/3116	0.000609572	0.037087	0.0339616	AGT/C3/CSF1/ENPP2/EPHA4/F2/FBLN1/FGFR1/HSP90AB1/IGFBP3/PRNP/NGF/IGF1R/MET/ITGA5/IL6R/BMP2/ACE/CEACAM1/PDGFRA/TNFRSF1A/ERBB3/LOX/ADAM8/PLAUR/BST1/PTPRJ/ERBB4/SEMA4D/TNFRSF11A	30
Glyco	GO:0043207	response to external biotic stimulus	41/203	383/3116	0.000612502	0.037087	0.0339616	A2M/C1S/C2/C3/C5/C7/CD14/CFB/CFH/CFHR1/CHGA/CSF1/F12/F2/FGA/FGB/GRN/IGHA1/IGHA2/IGHG1/IGHG3/IGHG4/NPC2/PENK/PGLYRP2/RNASET2/LY86/IL18BP/IL6R/BMP2/ACE/CEACAM1/IFNAR1/TNFRSF1A/ADAM8/TRIM29/DCST1/LILRA2/LILRB1/ERAP1/TNFRSF11A	41
Glyco	GO:0051707	response to other organism	41/203	383/3116	0.000612502	0.037087	0.0339616	A2M/C1S/C2/C3/C5/C7/CD14/CFB/CFH/CFHR1/CHGA/CSF1/F12/F2/FGA/FGB/GRN/IGHA1/IGHA2/IGHG1/IGHG3/IGHG4/NPC2/PENK/PGLYRP2/RNASET2/LY86/IL18BP/IL6R/BMP2/ACE/CEACAM1/IFNAR1/TNFRSF1A/ADAM8/TRIM29/DCST1/LILRA2/LILRB1/ERAP1/TNFRSF11A	41
Glyco	GO:0006952	defense response	45/203	434/3116	0.000645383	0.0381248	0.034912	A2M/AGT/C1S/C2/C3/C5/C7/CD14/CFB/CFH/CFHR1/CHGA/CSF1/F12/F2/FGA/FGB/GRN/IGHA1/IGHA2/IGHG1/IGHG3/IGHG4/LGALS3BP/ORM2/PENK/PGLYRP2/RNASET2/LILRA1/LILRB5/LY86/IL6R/BMP2/CEACAM1/IFNAR1/TNFRSF1A/NT5E/ADAM8/BST1/TRIM29/DCST1/LILRA2/LILRB1/ERAP1/TNFRSF11A	45
Glyco	GO:0002526	acute inflammatory response	9/203	39/3116	0.000674219	0.0383416	0.0351105	A2M/C3/F12/F2/IGHG1/ORM2/IL6R/ADAM8/TNFRSF11A	9
Glyco	GO:0032990	cell part morphogenesis	30/203	253/3116	0.000698287	0.0383416	0.0351105	APLP1/CDH2/ENPP2/EPHA4/HSP90AB1/NFASC/NLGN1/FLRT2/CSPG5/NGF/IGF1R/PTPRM/ECE1/EPHB3/TPBG/BMPR2/SEMA3A/EFNB3/TMEM108/UNC5D/AMIGO1/ENAH/LRTM2/ROBO4/SEMA4D/SEMA6B/FLRT1/PLXNA1/FZD4/UST	30
Glyco	GO:0023056	positive regulation of signaling	44/203	424/3116	0.000738735	0.0383416	0.0351105	AGT/C3/CD14/CDH2/CHGA/CSF1/CTSD/DCN/EPHA4/F2/FGA/FGB/FGFR1/HSP90AB1/IGFBP3/LAMC1/NLGN1/PRNP/SHISA7/ADAMTS3/LY86/NGF/IGF1R/ITGA5/IL6R/BMP2/PDGFRA/ATF6/TNFRSF1A/ERBB3/ECE1/ADAM8/PLAUR/GRIN1/PTPRJ/TPBG/BMPR2/SEMA3A/ERBB4/EFNB3/TMEM108/SEMA4D/EDA2R/TNFRSF11A	44
Glyco	GO:0038127	ERBB signaling pathway	8/203	32/3116	0.000761868	0.0383416	0.0351105	AGT/PIGR/CEACAM1/ERBB3/PLAUR/PTPN12/PTPRJ/ERBB4	8
Glyco	GO:0006468	protein phosphorylation	31/203	266/3116	0.000762752	0.0383416	0.0351105	AGT/C3/CSF1/ENPP2/EPHA4/F2/FBLN1/FGFR1/HSP90AB1/IGFBP3/PRNP/NGF/IGF1R/ITGA5/IL6R/BMP2/ACE/CEACAM1/PDGFRA/TNFRSF1A/ERBB3/LOX/EPHB3/ADAM8/PLAUR/BST1/PTPRJ/BMPR2/ERBB4/SEMA4D/TNFRSF11A	31
Glyco	GO:0007157	heterophilic cell-cell adhesion via plasma membrane cell adhesion molecules	7/203	25/3116	0.000786735	0.0383416	0.0351105	CADM3/CDH2/NLGN1/CEACAM5/ITGA5/AMIGO1/TENM2	7
Glyco	GO:0031401	positive regulation of protein modification process	24/203	187/3116	0.000811336	0.0383416	0.0351105	AGT/C3/CSF1/ENPP2/EPHA4/F2/FGFR1/HSP90AB1/PRNP/NGF/ITGA5/IL6R/BMP2/ACE/TNFRSF1A/CD33/ERBB3/ADAM8/PLAUR/PTPRJ/ERBB4/SEMA4D/BTRC/TNFRSF11A	24
Glyco	GO:0002429	immune response-activating cell surface receptor signaling pathway	13/203	75/3116	0.000892874	0.0383416	0.0351105	CD14/IGHA1/IGHA2/IGHG1/IGHG3/IGHG4/PRNP/CEACAM1/CD79B/PTPRJ/SLC39A6/BTN2A1/LILRA2	13
Glyco	GO:0050730	regulation of peptidyl-tyrosine phosphorylation	13/203	75/3116	0.000892874	0.0383416	0.0351105	AGT/ENPP2/EPHA4/PRNP/ITGA5/IL6R/ACE/TNFRSF1A/ERBB3/BST1/PTPRJ/ERBB4/SEMA4D	13
Glyco	GO:0007411	axon guidance	16/203	104/3116	0.000914824	0.0383416	0.0351105	EPHA4/NFASC/FLRT2/PTPRM/ECE1/EPHB3/BMPR2/SEMA3A/EFNB3/UNC5D/ENAH/LRTM2/ROBO4/SEMA4D/SEMA6B/PLXNA1	16
Glyco	GO:0097485	neuron projection guidance	16/203	104/3116	0.000914824	0.0383416	0.0351105	EPHA4/NFASC/FLRT2/PTPRM/ECE1/EPHB3/BMPR2/SEMA3A/EFNB3/UNC5D/ENAH/LRTM2/ROBO4/SEMA4D/SEMA6B/PLXNA1	16
Glyco	GO:0051240	positive regulation of multicellular organismal process	45/203	441/3116	0.000919903	0.0383416	0.0351105	AGT/BCAN/C3/C5/CD14/CHGA/CSF1/EPHA4/F12/F2/FGA/FGB/GRN/LRRC4B/NLGN1/ORM2/PENK/PLG/FLRT2/NGF/HLA-DQA1/IGF1R/ITGA5/IL6R/BMP2/ACE/ERBB3/EPHB3/ADAM8/BST1/PTPRJ/TPBG/BMPR2/ERBB4/EFNB3/AMIGO1/LILRA2/LRTM2/LILRB1/SEMA4D/ERAP1/PLXNA1/FZD4/MYRF/TNFRSF11A	45
Glyco	GO:0050808	synapse organization	25/203	200/3116	0.000934716	0.0383416	0.0351105	BCAN/C3/CDH2/EPHA4/LRRC4B/NEGR1/NLGN1/NRXN2/PRNP/SEZ6L2/SPARCL1/SHISA7/FLRT2/IGF1R/EPHB3/TPBG/ERBB4/EFNB3/TMEM108/AMIGO1/LGI2/LRTM2/SEMA4D/LRRC4/PCDHB11	25
Glyco	GO:0032989	cellular component morphogenesis	32/203	281/3116	0.000934765	0.0383416	0.0351105	APLP1/CDH2/ENPP2/EPHA4/HSP90AB1/NFASC/NLGN1/FLRT2/CSPG5/NGF/IGF1R/PDGFRA/PTPRM/ECE1/EPHB3/TPBG/BMPR2/SEMA3A/EFNB3/TMEM108/UNC5D/AMIGO1/ENAH/LRTM2/ROBO4/SEMA4D/ABCA2/SEMA6B/FLRT1/PLXNA1/FZD4/UST	32
Glyco	GO:0042310	vasoconstriction	6/203	19/3116	0.000940358	0.0383416	0.0351105	AGT/FGA/FGB/ACE/ECE1/BMPR2	6
Glyco	GO:0097106	postsynaptic density organization	6/203	19/3116	0.000940358	0.0383416	0.0351105	CDH2/LRRC4B/NLGN1/NRXN2/TMEM108/LRRC4	6
Glyco	GO:0030195	negative regulation of blood coagulation	8/203	33/3116	0.00095032	0.0383416	0.0351105	F12/F2/FGA/FGB/PLG/CEACAM1/PDGFRA/PLAUR	8
Glyco	GO:0120039	plasma membrane bounded cell projection morphogenesis	29/203	246/3116	0.00095145	0.0383416	0.0351105	APLP1/CDH2/ENPP2/EPHA4/HSP90AB1/NFASC/NLGN1/FLRT2/NGF/IGF1R/PTPRM/ECE1/EPHB3/TPBG/BMPR2/SEMA3A/EFNB3/TMEM108/UNC5D/AMIGO1/ENAH/LRTM2/ROBO4/SEMA4D/SEMA6B/FLRT1/PLXNA1/FZD4/UST	29
Glyco	GO:1901890	positive regulation of cell junction assembly	10/203	49/3116	0.000960645	0.0383416	0.0351105	AGT/LRRC4B/NLGN1/FLRT2/EPHB3/PTPRJ/TPBG/AMIGO1/LRTM2/SEMA4D	10
Glyco	GO:0048585	negative regulation of response to stimulus	42/203	405/3116	0.001016	0.0383416	0.0351105	A2M/AGT/AMBP/APLP1/C5/CD59/CDH2/DCN/DKK3/EPHA4/F12/F2/FBLN1/FGA/FGB/GRN/IGFBP3/PGLYRP2/PLG/PRNP/WFIKKN2/IGF1R/MET/BMP2/CEACAM1/PDGFRA/TNFRSF1A/NT5E/ERBB3/PLAUR/PTPN12/PTPRJ/TPBG/SEMA3A/DCST1/LILRA2/LILRB1/PTPRU/SEMA4D/HHIP/SEMA6B/BTRC	42
Glyco	GO:0007156	homophilic cell adhesion via plasma membrane adhesion molecules	13/203	76/3116	0.00101628	0.0383416	0.0351105	CADM3/CDH2/PCDH9/CEACAM5/CEACAM1/PTPRM/AMIGO1/PCDH19/ROBO4/CDHR5/PCDHB11/PCDHGB7/PCDHGA9	13
Glyco	GO:0043491	phosphatidylinositol 3-kinase/protein kinase B signal transduction	13/203	76/3116	0.00101628	0.0383416	0.0351105	AGT/DCN/FGFR1/HSP90AB1/IGF1R/CEACAM1/PDGFRA/ERBB3/LOX/ADAM8/PTPRJ/TPBG/SEMA4D	13
Glyco	GO:0051960	regulation of nervous system development	22/203	168/3116	0.00102868	0.0383416	0.0351105	BCAN/EPHA4/F2/LRRC4B/NLGN1/FLRT2/NGF/TG/BMP2/ACE/EPHB3/TPBG/BMPR2/SEMA3A/EFNB3/AMIGO1/LRTM2/SEMA4D/SEMA6B/PLXNA1/FZD4/MYRF	22
Glyco	GO:0051897	positive regulation of phosphatidylinositol 3-kinase/protein kinase B signal transduction	11/203	58/3116	0.00102899	0.0383416	0.0351105	AGT/DCN/FGFR1/HSP90AB1/IGF1R/PDGFRA/ERBB3/ADAM8/PTPRJ/TPBG/SEMA4D	11
Glyco	GO:0051963	regulation of synapse assembly	10/203	50/3116	0.0011338	0.0404905	0.0370783	LRRC4B/NEGR1/NLGN1/FLRT2/EPHB3/TPBG/EFNB3/AMIGO1/LRTM2/SEMA4D	10
Glyco	GO:0022008	neurogenesis	48/203	484/3116	0.00114206	0.0404905	0.0370783	APLP1/BCAN/C3/CDH2/CSF1/EPHA4/F2/FGFR1/GRN/HSP90AB1/NEGR1/NFASC/NLGN1/PENK/FLRT2/CSPG5/NGF/IGF1R/MET/BMP2/ACE/ERBB3/PTPRM/ECE1/EPHB3/TPBG/BMPR2/SEMA3A/ERBB4/EFNB3/TMEM108/UNC5D/MDGA2/AMIGO1/ENAH/LRTM2/ROBO4/SEMA4D/OLFM3/HHIP/ABCA2/SEMA6B/TENM2/FLRT1/PLXNA1/FZD4/UST/MYRF	48
Glyco	GO:0009967	positive regulation of signal transduction	39/203	370/3116	0.00116038	0.0404905	0.0370783	AGT/C3/CD14/CDH2/CHGA/CSF1/CTSD/DCN/F2/FGA/FGB/FGFR1/HSP90AB1/IGFBP3/LAMC1/NLGN1/ADAMTS3/LY86/NGF/IGF1R/ITGA5/IL6R/BMP2/PDGFRA/ATF6/TNFRSF1A/ERBB3/ADAM8/PLAUR/GRIN1/PTPRJ/TPBG/BMPR2/SEMA3A/ERBB4/TMEM108/SEMA4D/EDA2R/TNFRSF11A	39
Glyco	GO:0051965	positive regulation of synapse assembly	8/203	34/3116	0.00117438	0.0404905	0.0370783	LRRC4B/NLGN1/FLRT2/EPHB3/TPBG/AMIGO1/LRTM2/SEMA4D	8
Glyco	GO:1900047	negative regulation of hemostasis	8/203	34/3116	0.00117438	0.0404905	0.0370783	F12/F2/FGA/FGB/PLG/CEACAM1/PDGFRA/PLAUR	8
Glyco	GO:0002682	regulation of immune system process	40/203	383/3116	0.00119244	0.0404905	0.0370783	A2M/AMBP/C1S/C2/C3/C5/C7/CD14/CD59/CFB/CFH/CFHR1/CSF1/GRN/IGHA1/IGHA2/IGHG1/IGHG3/IGHG4/ORM2/PGLYRP2/PRNP/PIGR/HLA-DQA1/IL6R/CEACAM1/CD33/LOX/CD79B/ADAM8/GCNT1/BST1/PTPRJ/SLC39A6/EFNB3/DCST1/BTN2A1/LILRA2/LILRB1/ERAP1	40
Glyco	GO:0010647	positive regulation of cell communication	43/203	421/3116	0.00120368	0.0404905	0.0370783	AGT/C3/CD14/CDH2/CHGA/CSF1/CTSD/DCN/EPHA4/F2/FGA/FGB/FGFR1/HSP90AB1/IGFBP3/LAMC1/NLGN1/PRNP/SHISA7/ADAMTS3/LY86/NGF/IGF1R/ITGA5/IL6R/BMP2/PDGFRA/ATF6/TNFRSF1A/ERBB3/ADAM8/PLAUR/GRIN1/PTPRJ/TPBG/BMPR2/SEMA3A/ERBB4/EFNB3/TMEM108/SEMA4D/EDA2R/TNFRSF11A	43
Glyco	GO:0051962	positive regulation of nervous system development	17/203	117/3116	0.00123225	0.0408836	0.0374383	BCAN/EPHA4/LRRC4B/NLGN1/FLRT2/NGF/BMP2/ACE/EPHB3/TPBG/BMPR2/AMIGO1/LRTM2/SEMA4D/PLXNA1/FZD4/MYRF	17
Glyco	GO:0048812	neuron projection morphogenesis	28/203	239/3116	0.00129335	0.0423309	0.0387636	APLP1/CDH2/EPHA4/HSP90AB1/NFASC/NLGN1/FLRT2/NGF/IGF1R/PTPRM/ECE1/EPHB3/TPBG/BMPR2/SEMA3A/EFNB3/TMEM108/UNC5D/AMIGO1/ENAH/LRTM2/ROBO4/SEMA4D/SEMA6B/FLRT1/PLXNA1/FZD4/UST	28
Glyco	GO:0006957	complement activation, alternative pathway	5/203	14/3116	0.0013772	0.0430789	0.0394486	C3/C5/C7/CFB/CFH	5
Glyco	GO:0043171	peptide catabolic process	5/203	14/3116	0.0013772	0.0430789	0.0394486	ACE/ANPEP/ECE1/ERAP2/ERAP1	5
Glyco	GO:0002764	immune response-regulating signaling pathway	16/203	108/3116	0.00138857	0.0430789	0.0394486	CD14/IGHA1/IGHA2/IGHG1/IGHG3/IGHG4/PRNP/PIGR/CEACAM1/CD33/CD79B/PTPRJ/SLC39A6/BTN2A1/LILRA2/LILRB1	16
Glyco	GO:0030193	regulation of blood coagulation	9/203	43/3116	0.00142803	0.0430789	0.0394486	F12/F2/FGA/FGB/PLG/SERPINC1/CEACAM1/PDGFRA/PLAUR	9
Glyco	GO:0019220	regulation of phosphate metabolic process	32/203	288/3116	0.00142825	0.0430789	0.0394486	AGT/C3/CSF1/ENPP2/EPHA4/F2/FBLN1/FGFR1/HSP90AB1/IGFBP3/PRNP/NGF/IGF1R/MET/ITGA5/IL6R/BMP2/ACE/CEACAM1/PDGFRA/TNFRSF1A/CD33/ERBB3/LOX/ADAM8/PLAUR/BST1/PTPRJ/ERBB4/SEMA4D/ABCA2/TNFRSF11A	32
Glyco	GO:0050819	negative regulation of coagulation	8/203	35/3116	0.00143868	0.0430789	0.0394486	F12/F2/FGA/FGB/PLG/CEACAM1/PDGFRA/PLAUR	8
Glyco	GO:0001932	regulation of protein phosphorylation	27/203	229/3116	0.00144071	0.0430789	0.0394486	AGT/C3/CSF1/ENPP2/EPHA4/F2/FBLN1/FGFR1/HSP90AB1/IGFBP3/PRNP/NGF/ITGA5/IL6R/BMP2/ACE/CEACAM1/TNFRSF1A/ERBB3/LOX/ADAM8/PLAUR/BST1/PTPRJ/ERBB4/SEMA4D/TNFRSF11A	27
Glyco	GO:0002252	immune effector process	26/203	218/3116	0.00149678	0.0436738	0.0399934	A2M/C1S/C2/C3/C5/C7/CD59/CFB/CFH/CFHR1/CHGA/F2/GRN/IGHA1/IGHA2/IGHG1/IGHG3/IGHG4/PGLYRP2/PTGDS/IL6R/ACE/CEACAM1/PTPRJ/LILRA2/LILRB1	26
Glyco	GO:0051094	positive regulation of developmental process	37/203	350/3116	0.00150093	0.0436738	0.0399934	AGT/BCAN/C3/CSF1/DCN/ENPP2/EPHA4/FGFR1/GRN/HSP90AB1/IGFBP3/LAMC1/LRRC4B/NLGN1/FLRT2/NGF/IGF1R/ITGA5/IL6R/BMP2/ACE/CEACAM1/TNFRSF1A/ERBB3/EPHB3/ADAM8/TPBG/BMPR2/ERBB4/AMIGO1/LRTM2/FNDC5/SEMA4D/ERAP1/PLXNA1/FZD4/MYRF	37
Glyco	GO:0051174	regulation of phosphorus metabolic process	32/203	289/3116	0.0015147	0.0436738	0.0399934	AGT/C3/CSF1/ENPP2/EPHA4/F2/FBLN1/FGFR1/HSP90AB1/IGFBP3/PRNP/NGF/IGF1R/MET/ITGA5/IL6R/BMP2/ACE/CEACAM1/PDGFRA/TNFRSF1A/CD33/ERBB3/LOX/ADAM8/PLAUR/BST1/PTPRJ/ERBB4/SEMA4D/ABCA2/TNFRSF11A	32
Glyco	GO:0051896	regulation of phosphatidylinositol 3-kinase/protein kinase B signal transduction	12/203	70/3116	0.0015541	0.0442827	0.040551	AGT/DCN/FGFR1/HSP90AB1/IGF1R/CEACAM1/PDGFRA/ERBB3/ADAM8/PTPRJ/TPBG/SEMA4D	12
Glyco	GO:1903522	regulation of blood circulation	11/203	61/3116	0.00158919	0.0447561	0.0409845	AGT/CHGA/FGA/FGB/GAA/ACE/ECE1/BMPR2/SCN4B/KCNE4/KCNE3	11
Glyco	GO:0042730	fibrinolysis	6/203	21/3116	0.00168467	0.0466734	0.0427402	F12/F2/FGA/FGB/PLG/PLAUR	6
Glyco	GO:1900046	regulation of hemostasis	9/203	44/3116	0.00169581	0.0466734	0.0427402	F12/F2/FGA/FGB/PLG/SERPINC1/CEACAM1/PDGFRA/PLAUR	9
