# Supplementary material for: Comparative evaluation of analytical methods for CSF proteomics
Source: Clin Proteomics. 2025 Nov 28;22:46. doi: 10.1186/s12014-025-09568-y (PMC12661759; doi:10.1186/s12014-025-09568-y)
Supplement: Supplementary file 4 — Supplementary Material 4. [file 12014_2025_9568_MOESM4_ESM.xlsx]

## Sheet: SubcellularLocation_supp4
Results from subcellular localization, related to figure 4E
Method	Location	OddsRatio	OR_lower	OR_upper	P_value	N_method	N_location	N_overlap	Log2OR	FDR	FDR_numeric	Representation
glyco	Cell_adhesion	0.906249	0.237177	2.47445	1	219	66	4	-0.142021	1	white	Under
glyco	Cytoplasmic_bodies	0	0	6.30328	1	219	10	0	0	1	white	Under
glyco	Cytoskeleton	0.915513	0.32368	2.10446	1	219	98	6	-0.127348	1	white	Under
glyco	Cytosol	0.375412	0.225483	0.595628	3.23592e-06	219	700	21	-1.41345	0	black	Under
glyco	Endoplasmic reticulum	0.973194	0.429002	1.94222	1	219	139	9	-0.0392005	1	white	Under
glyco	Golgi apparatus	1.05127	0.553589	1.85064	0.883617	219	202	14	0.0721331	0.884	white	Over
glyco	Lysosomes	1.40899	0.0323247	9.98671	0.5306	219	11	1	0.494663	0.531	white	Over
glyco	Mitochondria	0.0698436	0.00175464	0.398242	3.45332e-05	219	191	1	-3.83973	0	black	Under
glyco	Nucleus	0.488926	0.305951	0.751627	0.00047155	219	668	25	-1.03231	0	black	Under
glyco	Plasma membrane	1.61254	1.08116	2.35281	0.0156224	219	382	37	0.689337	0.016	gray80	Over
glyco	Vesicles	1.96246	1.33016	2.83979	0.000613333	219	355	40	0.972666	0.001	gray60	Over
mstern	Cell_adhesion	0	0	3.19191	0.631678	59	66	0	0	0.632	white	Under
mstern	Cytoplasmic_bodies	0	0	25.0461	1	59	10	0	0	1	white	Under
mstern	Cytoskeleton	0	0	2.1092	0.421006	59	98	0	0	0.421	white	Under
mstern	Cytosol	0.57813	0.235797	1.23484	0.196975	59	700	8	-0.790535	0.197	white	Under
mstern	Endoplasmic reticulum	3.7221	1.49468	8.11686	0.00290366	59	139	8	1.89612	0.003	gray60	Over
mstern	Golgi apparatus	0.533735	0.0626716	2.04489	0.581727	59	202	2	-0.905804	0.582	white	Under
mstern	Lysosomes	0	0	22.3769	1	59	11	0	0	1	white	Under
mstern	Mitochondria	0.870281	0.172624	2.71794	1	59	191	3	-0.200447	1	white	Under
mstern	Nucleus	0.282435	0.0740858	0.76923	0.00796811	59	668	4	-1.82401	0.008	gray60	Under
mstern	Plasma membrane	0.404762	0.0806353	1.25509	0.148573	59	382	3	-1.30485	0.149	white	Under
mstern	Vesicles	1.50636	0.645527	3.129	0.284418	59	355	9	0.59107	0.284	white	Over
mv	Cell_adhesion	1.861	0.897025	3.56609	0.067871	357	66	12	0.896078	0.068	white	Over
mv	Cytoplasmic_bodies	0.916058	0.0208416	6.64327	1	357	10	1	-0.126489	1	white	Under
mv	Cytoskeleton	0.435533	0.137247	1.06383	0.0685694	357	98	5	-1.19915	0.069	white	Under
mv	Cytosol	0.574872	0.412267	0.788176	0.000345839	357	700	50	-0.798688	0	black	Under
mv	Endoplasmic reticulum	1.86899	1.14374	2.95136	0.0110888	357	139	25	0.902255	0.011	gray80	Over
mv	Golgi apparatus	0.695808	0.384794	1.17814	0.198231	357	202	16	-0.523238	0.198	white	Under
mv	Lysosomes	1.8368	0.192382	8.9257	0.337382	357	11	2	0.877197	0.337	white	Over
mv	Mitochondria	7.36317	5.3104	10.1813	6.14562e-31	357	191	80	2.88033	0	black	Over
mv	Nucleus	0.692623	0.502915	0.939827	0.0175188	357	668	55	-0.529859	0.018	gray80	Under
mv	Plasma membrane	1.28124	0.910796	1.77399	0.13612	357	382	50	0.357544	0.136	white	Over
mv	Vesicles	0.569044	0.353881	0.877762	0.00847028	357	355	24	-0.813389	0.008	gray60	Under
seer	Cell_adhesion	1.01485	0.571089	1.75004	1	1040	66	21	0.021262	1	white	Over
seer	Cytoplasmic_bodies	2.17918	0.500333	9.49195	0.303835	1040	10	5	1.12379	0.304	white	Over
seer	Cytoskeleton	0.324137	0.165029	0.587878	3.47081e-05	1040	98	13	-1.62532	0	black	Under
seer	Cytosol	0.978849	0.813335	1.17572	0.854557	1040	700	218	-0.0308412	0.855	white	Under
seer	Endoplasmic reticulum	1.07879	0.734597	1.56561	0.709188	1040	139	46	0.109414	0.709	white	Over
seer	Golgi apparatus	1.24753	0.913647	1.69322	0.159226	1040	202	73	0.319075	0.159	white	Over
seer	Lysosomes	0.482214	0.0506168	2.33558	0.519352	1040	11	2	-1.05225	0.519	white	Under
seer	Mitochondria	0.522602	0.35344	0.756442	0.000285527	1040	191	38	-0.936216	0	black	Under
seer	Nucleus	1.75	1.46215	2.09314	6.52401e-10	1040	668	278	0.807355	0	black	Over
seer	Plasma membrane	0.618531	0.475752	0.798015	0.000134909	1040	382	88	-0.693081	0	black	Under
seer	Vesicles	1.34673	1.06265	1.70192	0.0130498	1040	355	133	0.429465	0.013	gray80	Over
sev	Cell_adhesion	0.972572	0.193132	3.03085	1	154	66	3	-0.0401233	1	white	Under
sev	Cytoplasmic_bodies	5.15806	0.529214	26.1522	0.076091	154	10	2	2.36683	0.076	white	Over
sev	Cytoskeleton	0.638324	0.12787	1.95984	0.626567	154	98	3	-0.647638	0.627	white	Under
sev	Cytosol	0.302106	0.151597	0.548643	6.75336e-06	154	700	12	-1.72687	0	black	Under
sev	Endoplasmic reticulum	2.00897	0.987677	3.74543	0.0361689	154	139	12	1.00646	0.036	gray80	Over
sev	Golgi apparatus	0.950021	0.419227	1.89321	1	154	202	9	-0.073968	1	white	Under
sev	Lysosomes	0	0	8.19731	1	154	11	0	0	1	white	Under
sev	Mitochondria	0	0	0.379109	0.000134296	154	191	0	0	0	black	Under
sev	Nucleus	0.320964	0.161021	0.583063	2.11306e-05	154	668	12	-1.63952	0	black	Under
sev	Plasma membrane	1.21846	0.720609	1.96996	0.437724	154	382	21	0.285055	0.438	white	Over
sev	Vesicles	2.00706	1.27048	3.08252	0.00198523	154	355	29	1.00509	0.002	gray60	Over
