# Supplementary material for: Comparative evaluation of analytical methods for CSF proteomics
Source: Clin Proteomics. 2025 Nov 28;22:46. doi: 10.1186/s12014-025-09568-y (PMC12661759; doi:10.1186/s12014-025-09568-y)
Supplement: Supplementary file 5 — Supplementary Material 5. [file 12014_2025_9568_MOESM5_ESM.xlsx]

## Sheet: Sample mapping
Sample ID	Method
M1522	Mstern
M1821	Mstern
M1837	Mstern
M1850	Mstern
M1899	Mstern
M1908	Mstern
M1917	Mstern
M1919	Mstern
M1934	Mstern
M1952	Mstern
M1975	Mstern
M2012	Mstern
M2028	Mstern
M2030	Mstern
M2077	Mstern
M2104	Mstern
M2106	Mstern
M2112	Mstern
M2131	Mstern
MV_1522	P20-EV
MV_1821	P20-EV
MV_1837	P20-EV
MV_1850	P20-EV
MV_1899	P20-EV
MV_1908	P20-EV
MV_1917	P20-EV
MV_1919	P20-EV
MV_1934	P20-EV
MV_1952	P20-EV
MV_1975	P20-EV
MV_2012	P20-EV
MV_2030	P20-EV
MV_2077	P20-EV
MV_2104	P20-EV
MV_2106	P20-EV
MV_2131	P20-EV
S1522	Seer
S1821	Seer
S1837	Seer
S1850	Seer
S1899	Seer
S1908	Seer
S1917	Seer
S1919	Seer
S1934	Seer
S1952	Seer
SEV_1522	P150-EV
SEV_1821	P150-EV
SEV_1837	P150-EV
SEV_1850	P150-EV
SEV_1899	P150-EV
SEV_1908	P150-EV
SEV_1917	P150-EV
SEV_1919	P150-EV
SEV_1934	P150-EV
SEV_1952	P150-EV
SEV_1975	P150-EV
SEV_2012	P150-EV
SEV_2030	P150-EV
SEV_2077	P150-EV
SEV_2104	P150-EV
SEV_2106	P150-EV
SEV_2131	P150-EV
G1522	N-Gp
G1821	N-Gp
G1837	N-Gp
G1850	N-Gp
G1899	N-Gp
G1908	N-Gp
G1917	N-Gp
G1919	N-Gp
G1934	N-Gp
G1952	N-Gp
G1975	N-Gp
G2012	N-Gp
G2028	N-Gp
G2030	N-Gp
G2077	N-Gp
G2104	N-Gp
G2106	N-Gp
G2112	N-Gp
G2131	N-Gp

## Sheet: protein quant
Protein quant for processed proteomic profiles of CSF samples in cohort 3.Protein intensities were calculated by summing up intensities of the peptides matching to that protein. For N-glycoprotein, intensities were calculated by summing up intensities for the corresponding N-glycosites
Gene names	Uniprot IDs	Description	M1522	M1821	M1837	M1850	M1899	M1908	M1917	M1919	M1934	M1952	M1975	M2012	M2028	M2030	M2077	M2104	M2106	M2112	M2131	MV_1522	MV_1821	MV_1837	MV_1850	MV_1899	MV_1908	MV_1917	MV_1919	MV_1934	MV_1952	MV_1975	MV_2012	MV_2030	MV_2077	MV_2104	MV_2106	MV_2131	S1522	S1821	S1837	S1850	S1899	S1908	S1917	S1919	S1934	S1952	SEV_1522
A1BG	P04217;P04217-2	Alpha-1B-glycoprotein	5006691100	9806466100	11664485000	10618157000	6291876000	5201310000	10422380000	15441297000	2213178000	3475806800	3496178800	12612334000	6777253000	4948750500	12737065000	9581875000	11259994000	5655305000	11038698000	4809376900	10266826000	4247169000	14675521000	17399580000	13916460000	15707372000	5994364000	1420572000	1414942000	4154569000	3955412400	11957779000	5692880000	4549147700	6475492000	15541179000	274035600	1094249300	1646461000	128223300	825480800	267905000	597369600	699868200	681190800	4661843000	1114554800
A2M	P01023	Alpha-2-macroglobulin	29275836332	14545758838	19146145831	86535515136	9243414713	25171939498	53186445993	52697383144	16269513026	9983048530	24507087217	31445115117	43526896380	11574372227	62136172059	33848591975	35036885156	19678791679	32897284447	24986095148	17112420045	7149707355	61437237576	42196021055	37264959288	40720669053	16376898218	5978046958	3302891942	14794184707	10489637347	30200137822	20252214269	20028248593	17445051351	18665891370	5699686089	7904467315	6645710247	5758638021	5509359783	5270239087	6917986946	7156631876	24075996602	71090439509	4935847103
A4GALT	Q9NPC4	Lactosylceramide 4-alpha-galactosyltransferase	0	0	0	0	0	0	0	0	0	0	0	0	0	0	0	0	0	0	0	0	0	0	0	0	0	0	0	0	0	0	0	0	0	0	0	0	64102000	31714000	43487000	53644000	21559000	27179100	60520000	63430000	31811000	0	0
AARS1	P49588;P49588-2	Alanine--tRNA ligase, cytoplasmic	0	0	0	0	0	0	0	0	0	0	0	0	0	0	0	0	0	0	0	0	0	1599400	0	0	0	0	0	99065000	26671900	112455700	0	23487700	2032800	5482000	0	6775000	48655000	7724100	12444220	85462200	61810910	150254300	104506400	28115500	123729500	254230900	0
ABAT	P80404	4-aminobutyrate aminotransferase, mitochondrial	0	0	0	0	0	0	0	0	0	0	0	0	0	0	0	0	0	0	0	0	0	0	0	0	45452000	0	0	198015600	39251400	129220000	0	16608200	0	0	0	0	0	0	0	0	0	0	0	0	0	0	0
ABCB6	Q9NP58;Q9NP58-4	ATP-binding cassette sub-family B member 6	0	0	0	0	0	0	0	0	0	0	0	0	0	0	0	0	0	0	0	0	0	0	0	0	58037000	0	0	186745000	0	291269000	4984200	0	0	22885600	0	0	0	0	0	0	0	0	0	0	0	0	0
ABCC4	O15439;O15439-2;O15439-3;O15439-4	ATP-binding cassette sub-family C member 4	0	0	0	0	0	0	0	0	0	0	0	0	0	0	0	0	0	0	0	0	0	0	0	0	0	0	0	0	0	17605900	0	0	0	0	0	0	0	0	0	0	0	0	0	0	0	0	0
ABCE1	P61221	ATP-binding cassette sub-family E member 1	0	0	0	0	0	0	0	0	0	0	0	0	0	0	0	0	0	0	0	0	0	0	0	0	0	0	0	0	0	0	0	0	0	0	0	0	0	0	0	609300	0	3605590	0	0	12456600	29049600	0
ABCF1	Q8NE71;Q8NE71-2	ATP-binding cassette sub-family F member 1	0	0	0	0	0	0	0	0	0	0	0	0	0	0	0	0	0	0	0	0	0	0	0	0	0	0	0	0	0	0	0	0	0	0	0	0	0	0	337110	2564300	415010	0	1543900	524630	3645780	151452100	0
ABCG2	Q9UNQ0;Q9UNQ0-2	Broad substrate specificity ATP-binding cassette transporter ABCG2	0	0	0	0	0	0	0	0	0	0	0	0	0	0	0	0	0	0	0	0	0	0	0	0	0	0	0	8495300	0	21660200	0	0	0	0	0	0	0	0	0	0	0	0	0	0	0	0	0
ABHD14A	Q9BUJ0	Protein ABHD14A	28950000	6951700	5765200	0	11302000	18314600	33301000	4193500	5622200	0	0	9322900	5006500	0	21495000	13040000	26006000	5467200	9413200	53422600	33664800	11323700	8154900	29604900	39516000	47453000	11972000	0	3172000	0	5980200	31140000	14296000	5817400	9924900	46563000	765019000	356647500	298630200	270353000	554457000	348538700	792440000	544354000	322103800	45338020	0
ABHD14B	Q96IU4;Q96IU4-2	Putative protein-lysine deacylase ABHD14B	0	0	0	0	0	0	0	0	13714200	13795000	12673000	0	0	0	0	0	0	0	0	0	8967800	6058800	0	0	11518000	0	4658600	27018300	3471200	35905000	3698700	41424600	0	0	0	0	0	0	906020	0	10445780	373910	0	448290	6594800	306130000	0
ABI3BP	Q7Z7G0;Q7Z7G0-2;Q7Z7G0-3;Q7Z7G0-4	Target of Nesh-SH3	0	0	0	0	0	0	0	0	0	0	0	0	0	0	0	0	0	0	0	0	0	0	0	0	0	0	0	0	0	0	0	0	0	0	0	0	530304400	462411900	298881000	789351000	206373190	551973400	573201500	455670700	131476100	55293730	0
ABR	Q12979;Q12979-2;Q12979-3;Q12979-4	Active breakpoint cluster region-related protein	0	0	0	0	0	0	0	0	0	0	0	0	0	0	0	0	0	0	0	0	0	0	0	0	0	0	0	0	0	0	0	0	0	0	0	0	5730800	0	6056500	997670	4910500	9966200	4773700	1016800	5431400	743110	0
ABRACL	Q9P1F3	Costars family protein ABRACL	0	0	0	0	0	0	0	0	0	0	0	0	0	0	0	0	0	0	0	0	0	0	0	0	0	0	0	0	0	0	0	0	0	0	0	0	1739400	982480	14899000	7751100	60427000	13431000	15373000	3741300	32249000	430714000	0
ACAA2	P42765	3-ketoacyl-CoA thiolase, mitochondrial	0	0	0	0	0	0	0	0	0	22717900	0	0	0	0	0	0	0	0	0	0	0	0	0	0	0	0	0	0	0	0	0	0	0	0	0	0	0	0	0	0	0	0	0	0	0	0	0
ACADM	P11310;P11310-2	Medium-chain specific acyl-CoA dehydrogenase, mitochondrial	0	0	0	0	0	0	0	0	0	0	0	0	0	0	0	0	0	0	0	0	0	124730000	0	0	0	51858000	0	59222100	78952700	0	102480000	0	113700000	87207000	114140000	0	0	0	1085700	0	0	0	0	0	2523100	192440900	0
ACADVL	P49748;P49748-2;P49748-3	Very long-chain specific acyl-CoA dehydrogenase, mitochondrial	0	0	0	0	0	0	0	0	0	0	0	0	0	0	0	0	0	0	0	0	0	0	0	0	0	0	0	132791000	0	32356400	0	14485000	2513500	0	0	0	0	0	0	0	0	0	0	0	0	0	0
ACAN	P16112;P16112-2;P16112-3	Aggrecan core protein	0	0	0	0	0	0	0	0	0	0	0	0	0	0	0	0	0	0	0	0	0	0	0	0	0	0	0	0	0	0	0	0	0	0	0	0	567753000	195912700	135257400	104884200	29171600	303039900	442013300	162273500	36154800	34793480	0
ACAT1	P24752;P24752-2	Acetyl-CoA acetyltransferase, mitochondrial	0	0	0	0	0	0	0	0	0	0	0	0	0	0	0	0	0	0	0	0	0	0	0	0	29801300	0	0	699798000	94986800	420738600	20756000	151290300	117681400	33562400	0	0	1109700	0	411410	1269400	249080	5475000	0	479000	84652300	245615700	0
ACAT2	Q9BWD1;Q9BWD1-2	Acetyl-CoA acetyltransferase, cytosolic	0	0	0	0	0	0	0	0	0	17401600	0	0	7181600	0	0	7022100	0	0	0	0	0	0	0	0	0	0	0	4327000	9181100	27889000	0	0	4490700	7668200	0	0	0	0	0	0	2024500	2181200	0	0	20156400	187371000	0
ACHE	P22303;P22303-2;P22303-3;P22303-4	Acetylcholinesterase	0	0	0	0	0	0	0	0	0	0	0	0	0	0	0	0	0	0	0	0	0	0	0	0	0	0	0	0	0	0	0	0	0	0	0	0	35189600	89685900	16292000	16525900	51612100	30282300	25833300	30836800	35930000	13335850	0
ACIN1	Q9UKV3;Q9UKV3-2;Q9UKV3-3;Q9UKV3-5	Apoptotic chromatin condensation inducer in the nucleus	0	0	0	0	0	0	0	0	0	0	0	0	0	0	0	0	0	0	0	0	0	0	0	0	0	0	0	0	0	0	0	0	0	0	0	0	0	0	0	0	0	893230	0	0	0	65325600	0
ACLY	P53396;P53396-2;P53396-3	ATP-citrate synthase	0	0	0	0	0	0	0	0	0	9871200	7308700	0	0	0	0	0	0	0	0	0	1786400	0	0	0	45490200	0	0	136409000	21820400	304784000	6922500	7942100	0	27702200	0	0	2341600	0	7685170	7359270	11018370	135042400	19466430	4231200	772421900	615578600	0
ACO1	P21399	Cytoplasmic aconitate hydratase	0	0	0	0	0	0	0	0	0	0	0	0	0	0	0	0	0	0	0	0	0	0	0	0	0	0	0	0	0	0	0	0	0	0	0	0	8261700	8454000	15819500	36429000	35653200	54137200	16860700	3305990	64958400	90152500	0
ACO2	Q99798	Aconitate hydratase, mitochondrial	0	0	0	0	0	1750600	0	0	0	32112200	0	0	0	11568000	0	0	0	0	0	0	5391900	3133400	0	0	508192900	0	0	1729525800	627353400	2524328000	41201900	429512000	112226000	112905600	0	0	23505930	17099330	54860000	134996600	154881410	612892500	58463720	21701580	157236130	1537602000	0
ACOT1	Q86TX2	Acyl-coenzyme A thioesterase 1	0	0	0	0	0	0	0	0	0	0	0	0	0	0	0	0	0	0	0	0	0	0	0	0	0	0	0	0	0	0	0	0	0	0	0	0	0	0	301910	5496300	9163100	0	0	0	608240	3141000	0
ACOT13	Q9NPJ3;Q9NPJ3-2	Acyl-coenzyme A thioesterase 13	0	0	0	0	0	0	0	0	0	0	0	0	0	0	0	0	0	0	0	0	0	0	0	0	0	0	0	0	0	0	0	0	0	0	0	0	0	0	0	0	0	0	0	0	0	26580600	0
ACOT7	O00154;O00154-2;O00154-3;O00154-4;O00154-5;O00154-6;O00154-7	Cytosolic acyl coenzyme A thioester hydrolase	0	0	0	0	0	0	0	0	0	0	0	0	0	0	0	0	0	0	0	0	0	0	0	0	5827700	0	0	93304700	7499500	100871000	0	18669200	0	0	0	0	0	0	0	12220300	0	99166600	5024900	2304700	156448200	141656700	0
ACP1	P24666;P24666-2;P24666-3;P24666-4	Low molecular weight phosphotyrosine protein phosphatase	0	0	0	0	0	9024000	0	0	9010400	11188000	12823600	0	14905000	20169000	0	6218800	0	0	0	16886700	3247100	46604000	0	17005000	81537000	0	9593300	107163000	89739600	214002000	2982400	95097000	14448000	15869000	0	0	33348000	5424000	40651600	141745100	64427180	391974000	11134060	5717600	622041000	290400000	0
ACP2	P11117;P11117-2	Lysosomal acid phosphatase	0	0	0	0	0	0	0	0	0	0	0	0	0	0	0	0	0	0	0	0	0	0	0	0	0	0	0	0	0	0	0	0	0	0	0	0	55012400	70942080	22474510	2534000	74295300	24872100	102943000	21323640	38880400	6801450	0
ACP3	P15309;P15309-2;P15309-3	Prostatic acid phosphatase	0	0	0	0	0	0	0	0	0	0	0	0	0	0	0	0	0	0	0	0	0	0	0	0	0	0	0	0	0	0	0	0	0	0	0	0	0	0	0	11359000	0	46522500	9898200	1589400	0	0	0
ACP5	P13686	Tartrate-resistant acid phosphatase type 5	0	0	0	0	0	0	0	0	0	0	0	0	0	0	0	0	0	0	0	0	0	0	0	0	0	0	0	0	0	0	0	0	0	0	0	0	23322000	1697700	5354700	20725500	7580600	17190000	12193800	6842800	4165960	590020	0
ACP6	Q9NPH0;Q9NPH0-2	Lysophosphatidic acid phosphatase type 6	0	0	0	0	0	0	0	0	0	0	0	0	0	0	0	0	0	0	0	0	0	0	0	0	0	0	0	0	0	0	0	0	0	0	0	0	4562200	1939900	0	0	3742900	0	2490800	2356500	2270500	24992900	0
ACSF3	Q4G176	Malonate--CoA ligase ACSF3, mitochondrial	0	0	0	0	0	0	0	0	0	0	0	0	0	0	0	0	0	0	0	0	0	0	0	0	0	0	0	0	0	0	0	0	0	0	0	0	175650000	120550000	59914000	153280000	95477000	51230000	242020000	105960000	48402000	5391300	0
ACSL1	P33121;P33121-2;P33121-3	Long-chain-fatty-acid--CoA ligase 1	0	0	0	0	0	0	0	0	0	0	0	0	0	0	0	0	0	0	0	0	0	0	0	0	0	0	0	0	0	0	0	0	0	0	0	0	98969000	91910000	51225000	86394000	52481000	72846840	74750000	68502000	30855900	2522380	0
ACSL6	Q9UKU0;Q9UKU0-1;Q9UKU0-2;Q9UKU0-3;Q9UKU0-5;Q9UKU0-6;Q9UKU0-7;Q9UKU0-8;Q9UKU0-9	Long-chain-fatty-acid--CoA ligase 6	0	0	0	0	0	0	0	0	0	0	0	0	0	0	0	0	0	0	0	0	0	0	0	0	0	0	0	2604900	0	22159000	0	0	0	0	0	0	0	0	0	0	0	0	0	0	0	0	0
ACTA1	P68133	Actin, alpha skeletal muscle	73885040	13950098	213240943	276695684	112984331	628733323	470058966	76912306	176714645	619597902	390773163	75014818	356087923	393664009	290213810	755735018	154057418	99848718	10702097	262820359	1150956173	1266174250	779218062	985171290	13958653160	503574239	679895199	4498395560	999129590	5106476958	434306528	2730627773	1440049468	793595704	110082060	351045978	2115998152	1555629683	3915139569	3537323473	5840850479	5971411715	6189577007	2096788765	4448641595	15374842313	62684103
ACTB	P60709	Actin, cytoplasmic 1	406556950	107465694	635603117	468536437	961295155	1428061278	665075605	264747695	1043512450	2911528575	1349017018	793225928	1332768888	899307334	667225222	1613875053	230220652	468765955	361549010	1182530509	6056184331	6658820341	3008478957	3625869658	8691368753	2108126330	3051979348	17920124052	4958425750	18921530721	2187370196	10279612070	6002166350	5410127183	683271913	1609250831	4731040916	2493631739	9326923911	8399373634	13111563272	12166266966	13401369419	5567015036	11942813985	29640655164	349622564
ACTBL2	Q562R1	Beta-actin-like protein 2	9883566	6225958	12933417	4598640	19047071	39933557	19369109	16229613	13316415	45400018	15521842	17225765	21286306	28595163	10590827	37623652	5955011	10729066	526893	52665113	138907163	124906992	82392305	360686508	218259142	69464606	70516416	277126298	36309916	201640913	70499904	222641099	63132531	67141943	53421387	25291882	65264328	41374645	176399142	104481191	179862193	263282433	218510588	73778324	129043303	342486407	6488882
ACTG1	P63261	Actin, cytoplasmic 2	370592658	107465694	628777400	468536437	961295155	1428061278	665075605	264747695	937098504	3199639989	1336904414	720870101	1277369361	1392224566	667225222	1710990078	230220652	468765955	361549010	1173738248	6105012238	6586449023	3008478957	3617935797	8695298440	2085560873	3029133491	18037655888	4901376776	19210139371	2141325297	10472713726	6002693392	5330518926	676680014	1587842084	4731040916	2493631739	9324791575	8399373634	13111015151	12159355581	13398125877	5567015036	11942813985	29632908801	349622564
ACTL6A	O96019;O96019-2	Actin-like protein 6A	0	0	0	0	0	0	0	0	0	0	0	0	0	0	0	0	0	0	0	0	0	0	0	0	0	0	0	0	0	0	0	0	0	0	0	0	4207200	29162000	35352000	0	3754100	14090000	57795000	12892000	22274000	275336200	0
ACTN1	P12814;P12814-2;P12814-3;P12814-4	Alpha-actinin-1	0	0	0	0	0	0	0	0	0	0	0	0	0	0	0	0	0	0	0	7820598	24989398	15685483	44356787	16569322	69813025	17658379	17275681	129731414	27930235	138014426	5436678	62472483	11524524	12641879	3863064	21005131	4273513	1512910	27624779	27361030	37284021	673048198	39886814	11477333	216452081	45311516	0
ACTN2	P35609;P35609-2	Alpha-actinin-2	0	0	0	0	0	0	0	0	0	0	0	0	0	0	0	0	0	0	0	2448552	4002890	5795203	0	8452171	112071953	275342	2226309	6307882	3752084	24681491	3189419	15699786	5671296	6320788	2420572	21005131	1772989	6046141	8539352	23520907	12991124	122865185	23892272	10685566	20034959	6909797	0
ACTN3	Q08043	Alpha-actinin-3	0	0	0	0	0	0	0	0	0	0	0	0	0	0	0	0	0	0	0	2448552	3724628	5795203	0	8040756	180986644	0	745370	5326763	1037956	10554649	3189419	8103622	5671296	4689155	0	14885609	1021913	627633	2912201	1419189	460717	32280690	2490946	6197283	7715108	4730674	0
ACTN4	O43707;O43707-2;O43707-3	Alpha-actinin-4	0	0	0	0	0	0	0	0	0	0	0	0	0	0	0	0	0	0	0	7820598	45140093	32878010	41678813	26992891	37552778	17658379	26154241	356804917	70967195	346414620	9943084	76242810	23670186	12641879	3863064	21005131	95358244	40038446	147648975	130923813	114124648	588640171	134818268	62650527	318744214	1040770657	0
ACTR1A	P61163	Alpha-centractin	0	0	0	0	0	0	0	0	0	0	0	0	0	0	0	0	0	0	0	0	7716500	0	0	0	12363000	0	0	589921250	28569643	291004247	5542000	97831700	21686000	7658000	0	0	0	0	4071752	38700682	2066100	138621917	0	0	234603174	89289402	0
ACTR1B	P42025	Beta-centractin	0	0	0	0	0	0	0	0	0	0	0	0	0	0	0	0	0	0	0	0	0	0	0	0	0	0	0	3712750	5205557	55485753	0	0	0	0	0	0	0	0	626848	3117918	0	22819683	0	0	39725826	11370198	0
ACTR2	P61160;P61160-2	Actin-related protein 2	0	0	0	0	0	0	0	0	0	0	0	0	0	0	0	0	0	0	0	0	0	14670500	0	0	4769100	0	0	45421500	19833300	12294000	1359600	3760100	8586100	9875600	0	0	3744400	0	30729400	7633300	51680400	59679200	42007700	6325600	44782100	170288000	0
ACTR3	P61158	Actin-related protein 3	0	0	0	0	0	0	0	0	0	0	0	0	0	0	0	0	0	0	0	5295200	17577600	45055100	9406700	10055000	58524100	10363000	9814400	174442000	88047000	122666000	8782400	79981500	46729200	71855000	0	0	34589600	11191130	80686200	35649100	142697880	153220600	140746600	18387500	102541300	331041000	0
ACVR1B	P36896;P36896-2;P36896-3;P36896-4;P36896-5	Activin receptor type-1B	25868000	11222000	14043000	65801400	0	0	43448900	0	0	0	0	0	7073600	0	23056000	0	37506000	17587000	0	0	0	0	0	0	0	0	0	0	0	0	0	0	0	0	0	0	0	0	0	0	0	0	0	0	0	0	0
ACYP2	P14621	Acylphosphatase-2	9060900	0	0	0	0	14119000	9882800	0	0	9018500	0	0	0	31453800	9926100	6689100	0	0	0	0	0	0	6423800	4891300	6584800	5975300	0	47179000	5888600	34976700	2012300	29734000	3445900	4927600	0	0	2305400	3119500	1438700	4139600	1628500	7078500	0	4165200	2163000	27360500	0
ADA2	Q9NZK5;Q9NZK5-2	Adenosine deaminase 2	0	0	0	8050100	0	98664000	7959800	0	0	0	0	0	16635000	0	40695000	0	0	0	7337400	12366000	28276300	146070000	41238000	9279900	129200000	26916300	5373200	0	8846500	6485700	10992900	6054400	30832900	4500800	0	15218000	246647400	241926870	91979500	1011504500	213195700	941926000	564718900	94212300	142269200	943774000	0
ADAM10	O14672;O14672-2	Disintegrin and metalloproteinase domain-containing protein 10	15359000	0	14821000	0	19565300	0	30147000	24724700	14149700	30884200	0	18875000	8148800	10861000	14332000	38533000	77763000	33019000	28937600	4104100	49861720	24586200	47272000	5843900	20521000	35008800	9487900	52163000	30302200	74977200	7935100	30749900	9555400	41741900	8841900	12122300	290594000	170493400	175863800	470354000	245891500	289430000	509980900	309768100	139141400	202211600	0
ADAM11	O75078;O75078-2	Disintegrin and metalloproteinase domain-containing protein 11	30179000	0	0	0	4273600	0	26118000	0	0	0	0	6728900	0	0	0	0	19268600	2164000	0	9672200	0	0	16257600	0	0	26429400	0	0	0	0	0	0	7722600	0	10412000	5419000	60721100	42087400	12978800	11296100	48572000	0	17220200	10781800	15543100	28919060	0
ADAM15	Q13444;Q13444-10;Q13444-11;Q13444-12;Q13444-13;Q13444-2;Q13444-3;Q13444-4;Q13444-5;Q13444-6;Q13444-7;Q13444-8;Q13444-9	Disintegrin and metalloproteinase domain-containing protein 15	0	0	0	0	0	0	0	0	0	0	0	0	0	0	0	0	0	0	0	34778000	11415800	0	61516000	4679100	21801000	42627600	24188100	3616400	0	0	0	48442000	7837900	10646400	8992100	32144600	201340800	93527100	127980600	256939800	131998500	153477000	207021800	124041800	105724800	3252850	0
ADAM17	P78536;P78536-2	Disintegrin and metalloproteinase domain-containing protein 17	0	0	0	0	0	0	0	0	0	0	0	0	0	0	0	0	0	0	0	0	0	0	0	0	0	0	0	0	0	0	0	0	0	0	0	0	106012000	64904500	40018600	8451500	47437000	64933000	149408000	46539000	43280300	19666100	0
ADAM22	Q9P0K1;Q9P0K1-2;Q9P0K1-3;Q9P0K1-4;Q9P0K1-5	Disintegrin and metalloproteinase domain-containing protein 22	111763000	28947200	0	18462600	55665000	48819400	41518500	5419810	49857000	85349000	0	41738000	14846000	2759300	76053000	2068300	128664800	0	0	134152190	44549700	63118900	126893000	57227000	97497800	161649600	81686000	58220800	31589890	10982000	58875500	66856260	66605300	36481300	120432100	56082000	2078290800	1171171300	499298830	949870700	1090548300	447497260	1934780400	842565500	640545680	278444570	132548800
ADAM23	O75077;O75077-2;O75077-3	Disintegrin and metalloproteinase domain-containing protein 23	0	0	0	0	0	0	0	0	0	0	0	0	0	0	0	0	0	0	0	0	0	0	0	0	0	0	0	0	0	0	0	0	0	0	0	0	59053900	51252770	44209600	29368700	31401300	32583900	69931500	44567000	21705210	21426800	0
ADAM28	Q9UKQ2;Q9UKQ2-2	Disintegrin and metalloproteinase domain-containing protein 28	0	0	0	0	0	0	0	0	0	0	0	0	0	0	0	0	0	0	0	0	0	0	0	0	0	0	0	0	0	0	0	0	0	0	0	0	0	20935000	15279200	10719000	11058000	33219800	5037900	0	6681100	1467800	0
ADAM9	Q13443;Q13443-2	Disintegrin and metalloproteinase domain-containing protein 9	0	0	0	0	0	0	0	0	0	0	0	0	0	0	0	0	0	0	0	0	0	0	0	0	0	0	0	0	0	0	0	0	0	0	0	0	133737000	67447000	105389000	54947000	130202000	66671000	228382000	98547000	61716000	17526500	0
ADAMDEC1	O15204;O15204-2	ADAM DEC1	0	0	0	0	0	0	0	0	0	0	0	0	0	0	0	0	0	0	0	0	0	0	0	0	0	0	0	0	0	0	0	0	0	0	0	0	39368900	102962300	7944700	2221200	54228000	30113400	81611000	63413400	111351000	30705200	0
ADAMTS1	Q9UHI8	A disintegrin and metalloproteinase with thrombospondin motifs 1	159614000	75488000	44793000	125632000	184293000	0	139800000	31484000	30314000	36890500	0	117870000	0	43465000	262866000	28129000	109841000	160658000	57851700	303230000	103910000	91168400	1192961000	193701000	603816000	737001000	107650000	0	38317000	0	125309800	704153000	79654000	91475000	815270000	0	2106323900	843049000	1123781000	2028404700	1008111200	2148140600	1951196500	1551947300	847846000	177210900	168068000
ADAMTS2	O95450;O95450-2	A disintegrin and metalloproteinase with thrombospondin motifs 2	0	0	0	0	0	0	0	0	0	0	0	0	0	0	0	0	0	0	0	37129000	37344000	6957900	12745000	42685000	5874500	41901000	18104000	11399000	0	3174900	14136800	44744000	13420100	15845300	19116200	22417900	43265000	13570700	6740200	78392000	21096200	32271000	59090000	14508000	2460200	602490	0
ADAMTS4	O75173;O75173-2	A disintegrin and metalloproteinase with thrombospondin motifs 4	56447000	70157000	52034700	5501100	11099000	36568000	85899000	62836000	33927000	25027500	2712400	13308000	34585900	63847000	14692000	66756000	24148000	0	63805000	67590900	152950000	50639100	224730000	106590000	68523000	98406000	80514600	45339000	11134000	58775000	47338000	96565000	71005200	83668000	112535300	75226000	215238000	513068000	476599000	337122000	517649000	82511700	458252500	418194000	232926000	159924200	3540900
ADAMTS8	Q9UP79	A disintegrin and metalloproteinase with thrombospondin motifs 8	0	0	0	32410900	0	6178800	0	0	0	0	0	0	0	0	0	0	9140200	0	0	46336600	12805900	3145100	166974000	21066000	58869000	33978400	19817700	2929300	0	0	0	100136000	3314400	4901400	36836000	26025500	415051500	186000600	80699900	891657700	78643310	279295300	521792500	175522100	39527520	6098200	0
ADAMTSL2	Q86TH1	ADAMTS-like protein 2	0	0	0	0	0	0	0	0	0	0	0	0	0	0	0	0	0	0	0	0	0	0	0	0	0	0	0	0	0	0	0	0	0	0	0	0	497807200	201527800	143865400	447397900	219255800	212323300	508048800	215528900	97401800	47448450	0
ADAMTSL3	P82987;P82987-2	ADAMTS-like protein 3	0	0	0	0	0	0	0	0	0	0	0	0	0	0	0	0	0	0	0	0	0	0	0	0	0	0	0	0	0	0	0	0	0	0	0	0	29464800	27261700	1700000	23791700	3449480	12110380	9300900	20226300	10582460	0	0
ADAMTSL4	Q6UY14;Q6UY14-2;Q6UY14-3	ADAMTS-like protein 4	0	0	0	0	0	0	0	0	0	0	0	0	0	0	0	0	0	0	0	0	0	0	0	0	0	0	0	0	0	0	0	0	0	0	0	0	3148400	10018900	17056000	14685900	10753500	5309790	10419700	22380900	7105500	0	0
ADAR	P55265;P55265-2;P55265-3;P55265-4;P55265-5	Double-stranded RNA-specific adenosine deaminase	0	0	0	0	0	0	0	0	0	0	0	0	0	0	0	0	0	0	0	0	0	0	0	0	0	0	0	0	0	0	0	0	0	0	0	0	0	0	0	0	0	0	0	0	0	29198500	0
ADCYAP1	P18509	Pituitary adenylate cyclase-activating polypeptide	0	0	0	0	0	0	0	0	0	0	0	0	0	0	0	0	0	0	0	8539800	0	0	0	0	13065000	29134000	4066900	0	0	7986800	2865100	0	0	3278100	9507000	4032900	0	0	0	0	0	0	0	0	0	0	0
ADCYAP1R1	P41586;P41586-2;P41586-3;P41586-4;P41586-5	Pituitary adenylate cyclase-activating polypeptide type I receptor	0	0	0	0	0	0	0	0	0	0	0	0	0	0	0	0	0	0	0	0	0	0	0	0	0	0	0	0	0	0	0	0	0	0	0	0	42139000	7510400	10406000	70140000	18416000	34946000	64608000	24048000	14496000	14407000	0
ADD1	P35611;P35611-2;P35611-3;P35611-4;P35611-5;P35611-6	Alpha-adducin	0	0	0	0	0	11254595	0	0	7423800	0	11514845	0	1066500	0	0	0	0	0	0	0	0	0	47034000	0	267489576	0	0	517557700	72325800	1028429925	16489300	57365200	2964100	8975100	0	0	430110	0	1979060	208253225	164470	2810192113	7233900	4285700	948937791	64433931	0
ADD2	P35612;P35612-2;P35612-3;P35612-4;P35612-5;P35612-6;P35612-7;P35612-8;P35612-9	Beta-adducin	10040000	0	0	0	0	1051305	0	0	0	0	8720455	0	1066500	0	0	0	0	0	0	0	0	2263100	35301700	0	144643724	0	0	185467200	2823300	800531675	7540840	7451000	2629200	0	0	0	0	0	0	181845895	164470	669719187	1219300	5875900	907710409	58691439	0
ADD3	Q9UEY8;Q9UEY8-2	Gamma-adducin	0	0	0	0	0	0	0	0	0	0	0	0	0	0	0	0	0	0	0	0	0	0	0	0	0	0	0	0	0	0	0	0	0	0	0	0	0	733980	0	53750800	0	303648000	0	1445900	4292400	2153620	0
ADGRA3	Q8IWK6;Q8IWK6-2;Q8IWK6-3;Q8IWK6-4	Adhesion G protein-coupled receptor A3	0	0	0	0	0	0	0	0	0	0	0	0	0	0	0	0	0	0	0	0	0	0	0	0	0	0	0	0	0	0	0	0	0	0	0	0	7588300	11042000	12092100	0	10727100	3738300	6456000	5093700	6842000	0	0
ADGRB1	O14514	Adhesion G protein-coupled receptor B1	29038000	0	0	21933500	17836000	0	29309000	0	0	0	0	0	0	0	0	0	10651000	10350100	0	102908500	34144400	2224500	74749000	9433300	6320300	99393400	6197300	1777400	0	0	0	105582000	13601000	0	55470400	6235100	357311000	164512000	44109200	225798300	171263400	164169400	331987000	70559170	20879500	413160	0
ADGRB2	O60241;O60241-2;O60241-3;O60241-4	Adhesion G protein-coupled receptor B2	119428000	11719000	7860200	104980200	5577200	0	121866000	0	15310900	2886900	0	10463000	5320900	5549500	76108000	18277000	175974000	44366000	11604000	172392500	107650400	13782600	408302000	89185900	223862500	139362600	18165000	24017000	14407800	0	12884800	212587000	74758600	23833900	98010100	19183600	1028249000	407584200	305678020	474275000	482823400	299796550	881464900	353832000	273536900	166538400	51987000
ADGRE5	P48960;P48960-2;P48960-3	Adhesion G protein-coupled receptor E5	0	0	0	0	0	0	0	0	0	0	0	0	0	0	0	0	0	0	0	0	0	0	0	0	0	0	0	0	0	0	0	0	0	0	0	0	16529000	15734000	1285900	0	3569200	0	50168000	5558500	1250200	0	0
ADGRG1	Q9Y653;Q9Y653-2;Q9Y653-3;Q9Y653-4;Q9Y653-5	Adhesion G-protein coupled receptor G1	0	0	0	0	0	0	0	0	0	0	0	0	0	0	0	0	0	0	0	0	0	0	0	0	0	0	0	0	0	0	0	0	0	0	0	0	80770000	82874000	86584000	42994100	91193000	38885900	53103000	153043000	163921000	9997200	0
ADGRL1	O94910;O94910-2	Adhesion G protein-coupled receptor L1	310206800	181815000	51491600	232155000	152384000	65019400	297853300	101773200	33737700	34886000	0	106495300	11362900	93793600	319974800	42858600	365931000	113770800	119160100	271768400	93378000	25812000	540542000	146296000	292270000	368830000	81970000	9308500	3452200	10694000	42079900	140138000	135603000	77472000	286286900	123775300	156978140	171878990	45733670	63868520	126590000	57547200	128535560	38101500	84662950	140282200	37163500
ADGRL2	O95490;O95490-2;O95490-3;O95490-4;O95490-5;O95490-6;O95490-7	Adhesion G protein-coupled receptor L2	0	0	0	0	0	0	0	0	0	0	0	0	0	0	0	0	0	0	0	0	0	0	0	0	0	0	0	0	0	0	0	0	0	0	0	0	600620	20749800	5433100	0	7277700	0	4704200	1335100	765860	0	0
ADGRL3	Q9HAR2;Q9HAR2-2;Q9HAR2-3;Q9HAR2-4	Adhesion G protein-coupled receptor L3	46205100	30390900	13539700	25166000	6105100	41390000	192238500	15470500	8049700	1695600	1432500	21167800	23505900	20910200	126583000	10453600	274632100	0	40052400	79287800	10798000	0	78179100	3647600	48777000	57461000	4575600	0	4266460	0	0	29402400	15820000	0	21153000	6179000	65661010	99482400	18360800	1495100	86789500	2779800	43202200	26390600	25855000	24706700	12189000
ADH1B;ADH1C	P00325;P00325-2;P00326	All-trans-retinol dehydrogenase [NAD(+)] ADH1B; Alcohol dehydrogenase 1C	0	0	0	0	0	0	0	0	0	0	0	0	0	0	0	0	0	0	0	0	0	0	0	0	0	0	0	0	0	0	0	0	0	0	0	0	561190	0	9522000	6148500	1423950	8011500	6135500	15007600	28614300	500930	0
ADH4	P08319;P08319-2	All-trans-retinol dehydrogenase [NAD(+)] ADH4	0	0	0	0	0	0	0	0	0	0	0	0	0	0	0	0	0	0	0	0	0	0	0	0	0	0	0	0	0	0	0	0	0	0	0	0	0	0	22712700	0	11917640	944040	66959300	0	55797200	0	0
ADH5	P11766	Alcohol dehydrogenase class-3	0	0	0	0	0	0	0	0	0	0	13518000	0	0	43923100	0	0	0	0	0	0	9675100	6742000	0	6261300	7542200	0	5112600	88845600	7804500	51248000	2564500	56951000	17177500	10299000	0	3298400	19422400	1428200	11362700	4131300	14470400	66671000	882390	8337600	8615900	42367000	0
ADK	P55263;P55263-2;P55263-3;P55263-4	Adenosine kinase	0	0	0	0	0	0	0	0	0	0	0	0	0	0	0	0	0	0	0	0	0	0	0	0	0	0	0	0	0	0	0	0	0	0	0	0	0	0	350530	4690200	478890	27598110	919050	0	35743600	111448200	0
ADM	P35318	Pro-adrenomedullin	9571400	9834400	10800000	0	30587000	0	0	0	0	6249400	0	0	0	0	28475000	0	0	0	0	0	0	0	0	0	0	0	0	0	0	0	0	0	0	0	0	0	0	0	0	0	0	0	0	0	0	0	0
ADPGK	Q9BRR6;Q9BRR6-2;Q9BRR6-3;Q9BRR6-4	ADP-dependent glucokinase	0	0	0	0	0	0	0	0	0	0	0	0	0	0	0	0	0	0	0	0	0	0	0	0	0	0	0	0	0	0	0	0	0	0	0	0	8016600	5295100	0	5486000	3420000	2952300	6611000	7235800	4109200	0	0
ADSL	P30566;P30566-2	Adenylosuccinate lyase	0	0	0	0	0	0	0	0	0	0	0	0	0	0	0	0	0	0	0	0	0	0	0	0	0	0	0	0	0	0	0	0	0	0	0	0	0	0	4228210	115248800	16727890	626053400	18968210	13811200	909423300	321618900	0
ADSS2	P30520	Adenylosuccinate synthetase isozyme 2	0	0	0	0	0	0	0	0	0	0	0	0	0	0	0	0	0	0	0	0	0	0	0	0	0	0	0	15168500	13880300	26676600	1297500	0	2439200	3611900	0	0	0	0	0	0	1760000	0	0	0	0	67055500	0
AEBP1	Q8IUX7;Q8IUX7-2	Adipocyte enhancer-binding protein 1	75259800	51645900	38901300	34998000	19868600	34093900	91911800	25560000	28807200	0	0	29211000	0	9590900	75383000	266093500	80714000	17346700	25490100	211554513	149036295	58965838	136317000	62239000	209031653	174447689	92905501	10193700	0	5530049	21101653	183143219	58983700	132607000	86072000	114214384	6063145101	4240761236	2460047234	6534941442	2179134358	3713301745	5862134045	4331535855	1584734093	82938586	3927300
AFG3L2	Q9Y4W6	AFG3-like protein 2	0	0	0	0	0	0	0	0	0	0	0	0	0	0	0	0	0	0	0	0	0	0	0	0	0	0	0	39665000	668740	3385900	3521870	0	9826760	2731610	0	0	0	0	0	0	0	0	0	0	0	0	0
AFM	P43652	Afamin	732676800	1128557500	2789044300	1096509000	1248264300	256925000	1954669000	2345370900	529468200	341881900	630044000	3137823800	853013000	721903200	2398750300	2630087000	1870224000	1089846500	2876591700	1241841500	2053070050	1601683300	2462431800	4625780660	2448643000	3567597700	1150083500	331184200	186751900	1829623900	1372967600	2169124900	1576998000	2200663100	1361823490	3715082300	159765600	1319590700	1996672500	41746900	1021175900	98726800	672532100	845261000	1023558000	3439186200	498602060
AGA	P20933	N(4)-(beta-N-acetylglucosaminyl)-L-asparaginase	125398000	117799600	51749400	0	57292800	0	105969000	6351900	45330000	63541600	0	7518300	17788000	73021600	82921000	29756000	61289000	81117800	60303000	0	0	0	0	0	0	0	0	0	0	0	0	0	0	0	0	0	0	2858200	0	0	0	0	0	0	0	28589900	0
AGL	P35573;P35573-2;P35573-3	Glycogen debranching enzyme	0	0	0	0	0	0	0	0	0	0	0	0	0	0	0	0	0	0	0	0	0	0	0	0	0	0	0	0	0	0	0	0	0	0	0	0	0	0	0	0	0	0	0	0	8463630	103962800	0
AGO2	Q9UKV8;Q9UKV8-2	Protein argonaute-2	0	0	0	0	0	0	0	0	0	0	0	0	0	0	0	0	0	0	0	0	0	0	0	0	0	0	0	0	0	0	0	0	0	0	0	0	0	0	0	16289150	1307100	85625800	4723570	0	283241300	1614480	0
AGRN	O00468;O00468-2;O00468-3;O00468-4;O00468-5;O00468-6;O00468-7	Agrin	284160300	30286900	67079000	308039500	17028000	36737000	316349600	14808000	33382400	0	0	44888900	42461000	0	383879600	53957100	330199000	194395000	101672000	361151300	226018500	37574400	1118536800	221732900	303105340	416678000	67601700	43499000	22173500	26064000	36859900	410845900	158971000	76891180	280584000	206351300	3652881300	3713827900	1870642000	4013390500	2546352600	2134282370	3514169000	2481487120	1017608800	417218190	8861200
AGT	P01019	Angiotensinogen	20104301700	15407977000	16795229000	36448467000	14672097000	36315758000	44297148000	15772560000	18724646000	6797831900	6120812400	28120154300	21862881600	8425588000	38076921000	11519989000	45612324000	10678846000	30697987000	53309899900	60101919800	27770441100	100351107000	50041907000	77125824000	87296931000	30243235300	19536527000	14850412200	10667869400	33714386700	44538584100	51184539700	21514177700	79131763300	47682715100	72874233000	78090884100	64593758000	131487813000	61013773000	49435937000	91442021000	86037724200	54493809900	73776512000	38521221700
AHCY	P23526;P23526-2	Adenosylhomocysteinase	0	56411000	0	0	152360000	0	0	0	7959400	35321000	39709700	0	9146700	149420000	0	0	0	0	0	20194400	21730400	49422200	20237400	21850200	20693000	18608000	44430550	204658200	231771700	362277000	66876100	97911900	44464100	176037000	4009300	14460000	9132200	6974790	25385100	47328300	42579700	68661900	20693300	20844400	116836500	1312551000	27498000
AHCYL1;AHCYL2	O43865;O43865-2;Q96HN2;Q96HN2-2;Q96HN2-3;Q96HN2-4	S-adenosylhomocysteine hydrolase-like protein 1; Adenosylhomocysteinase 3	0	0	0	0	0	0	0	0	0	0	0	0	0	0	0	0	0	0	0	0	0	0	0	0	0	0	0	21822200	3494300	10790000	0	4983200	0	2518600	0	0	0	0	0	0	0	0	0	0	0	0	0
AHNAK	Q09666	Neuroblast differentiation-associated protein AHNAK	0	0	0	0	0	0	0	0	0	0	0	0	0	0	0	0	0	0	0	0	129113500	54082900	3114300	33267000	71707400	38037000	10666100	190930500	2920400	71856000	9736900	39558600	23163400	44135500	3742200	0	36943310	17789580	61360300	171951700	138929500	149335200	159103200	29100100	66138000	187665360	3121900
AHSA1	O95433;O95433-2	Activator of 90 kDa heat shock protein ATPase homolog 1	0	0	0	0	0	0	0	0	0	0	0	0	0	0	0	0	0	0	0	0	0	0	0	0	0	0	0	0	0	0	0	0	0	0	0	0	23222000	10291800	14554790	19038500	47946700	33402500	22943900	8786200	15070950	132037300	0
AHSG	P02765	Alpha-2-HS-glycoprotein	9052155700	7804553700	10212912000	10180785000	7483698000	3159850000	12418638000	10790166000	3129683400	599686000	4489147000	11587755000	6586550700	4934252000	11684929000	7105238000	13359021000	5349368000	17254958000	9087792100	8939371400	8256033900	20386769300	37615815000	12127728600	25499039000	10186380000	2068153000	1225200000	12104357600	10920347600	20119903800	10614238300	6137074600	12842938200	39785831790	5563810900	14822574300	15410811000	6434292000	10332124200	4000224600	10643530000	7533109000	7893975400	4193471170	2348386070
AHSP	Q9NZD4	Alpha-hemoglobin-stabilizing protein	0	0	0	0	0	0	0	0	0	0	42902600	0	0	0	0	0	0	0	0	0	0	0	0	0	0	0	0	0	0	40736000	0	0	0	1557900	0	0	0	0	0	125225000	3840740	174033300	17855700	24504870	399104000	3665020	0
AIDA	Q96BJ3;Q96BJ3-3	Axin interactor, dorsalization-associated protein	0	0	0	0	0	0	0	0	0	0	0	0	0	0	0	0	0	0	0	0	0	0	0	0	0	0	0	0	0	0	0	0	0	0	0	0	0	0	4487800	4396500	300820	18952200	0	232490	50398100	4874780	0
AIF1	P55008;P55008-2;P55008-3	Allograft inflammatory factor 1	0	0	0	0	0	0	0	0	0	0	0	0	0	0	0	0	0	0	0	0	0	0	0	0	0	0	0	0	0	0	0	0	0	0	0	0	0	2324200	16377000	0	40886000	3171800	15414000	3708400	6756300	0	0
AIFM1	O95831;O95831-2;O95831-3;O95831-4	Apoptosis-inducing factor 1, mitochondrial	0	0	0	0	0	0	0	0	0	0	0	0	0	0	0	0	0	0	0	0	0	0	0	0	0	0	0	0	0	0	0	0	0	0	0	0	0	0	0	0	0	0	0	0	0	15679200	0
AIMP1	Q12904;Q12904-2	Aminoacyl tRNA synthase complex-interacting multifunctional protein 1	0	0	0	0	0	0	0	0	0	0	0	0	0	0	0	0	0	0	0	0	0	0	0	0	0	0	0	0	0	0	0	0	0	0	0	0	0	0	0	0	752710	0	0	0	6086600	44415400	0
AIMP2	Q13155;Q13155-2	Aminoacyl tRNA synthase complex-interacting multifunctional protein 2	0	0	0	0	0	0	0	0	0	0	0	0	0	0	0	0	0	0	0	0	0	0	0	0	0	0	0	0	0	0	0	0	0	0	0	0	0	0	0	0	0	0	0	0	2796500	13374600	0
AJAP1	Q9UKB5	Adherens junction-associated protein 1	0	0	0	0	0	0	0	0	0	0	0	0	0	0	0	0	0	0	0	0	0	0	0	0	0	0	0	0	0	0	0	0	0	0	0	0	42673000	11487700	9001480	38652000	7946800	28199000	47305800	10547800	0	2723200	0
AK1	P00568	Adenylate kinase isoenzyme 1	0	0	0	0	0	30698700	0	0	61496100	0	77026100	0	98760000	761968100	0	41493600	0	0	0	38515700	547439340	370862650	160785300	207131200	803906000	22771250	264097500	6361907000	83474300	1681816200	921487300	3322802400	1357997900	1798859900	37345800	101972490	30846800	51715000	98494380	133293400	59404600	430895700	46531600	79585100	1273585300	199446600	0
AK2	P54819;P54819-2;P54819-3;P54819-4;P54819-5;P54819-6	Adenylate kinase 2, mitochondrial	0	0	0	0	0	0	0	0	0	0	0	0	0	0	0	0	0	0	0	0	0	0	0	0	0	0	0	0	0	0	0	0	0	0	0	0	0	0	0	0	0	0	3006400	0	3865100	606985000	0
AKAP12	Q02952;Q02952-2;Q02952-3	A-kinase anchor protein 12	0	0	0	0	0	0	0	0	0	0	0	0	0	0	0	0	0	0	0	3404600	2415600	0	0	0	8333800	0	1600200	99784700	14008600	136758000	0	12483600	0	2938500	0	0	0	0	542540	35260500	2313430	91991800	2253900	7237700	8598940	42136690	0
AKR1A1	P14550	Aldo-keto reductase family 1 member A1	0	0	0	0	42317700	0	0	0	0	60033700	0	0	5091200	15616000	5653600	0	0	5566500	0	9955400	53967900	103706400	29827000	36042000	13334000	49756400	19295800	221542900	172109000	132646800	11729500	121235600	92274000	81688000	0	23191300	9868030	2347370	17161300	30886700	221516600	12709200	9419500	27586600	13691870	721467000	0
AKR1B1	P15121	Aldo-keto reductase family 1 member B1	0	0	0	0	64765000	9543700	5515900	0	0	44412100	0	0	0	0	10902000	23107300	0	0	0	4224000	3066000	11043000	0	3051400	10388300	0	0	131482900	63698200	74809800	2158300	44640100	0	5268000	0	0	6750900	4291300	29416670	9201700	307864400	9428400	12848940	2316000	19853800	669756700	0
AKR7A2	O43488	Aflatoxin B1 aldehyde reductase member 2	0	0	0	0	0	0	0	0	0	0	0	0	0	0	0	0	0	0	0	0	0	12082300	0	0	0	0	0	97701000	3421900	28016000	2427800	54876000	30675500	0	0	0	0	0	8165740	21584100	5653150	84901900	0	4009700	120048500	33652000	0
ALAD	P13716;P13716-2	Delta-aminolevulinic acid dehydratase	0	0	0	0	0	33376000	0	0	153425400	0	117484000	0	131887900	27320700	0	87016000	0	0	0	0	0	0	15075000	0	118770700	0	0	178404000	4470680	323131000	5573600	37740200	4671100	21032000	0	0	0	4034000	0	0	0	181604800	0	14238940	1478872900	78182810	0
ALB	P02768;P02768-2;P02768-3	Albumin	1747295683600	1700183734300	2123433233200	1671570187000	1450301975600	336900148800	1670541068800	1947163808600	989712259800	489969343600	622510550700	2051640008200	1363697518400	1238410460700	1659900755700	1953759646900	1972211717500	1494711518700	2419683390600	1837144318300	2370684086600	1544775674600	2854746394100	3134169661700	2635325463500	2386947305200	1572493007860	938884977800	270559148930	1599978677200	1405899687600	2734159606700	1810871862160	1805967949800	1685044892780	3310776601100	420677716600	850002146600	752206415710	174842330400	664841257390	291949243400	473795755200	656874492420	612410903100	1195079429000	574311079490
ALCAM	Q13740;Q13740-2;Q13740-3;Q13740-4	CD166 antigen	493618300	252110200	154655500	520956000	162394100	250149000	436363000	129389100	100818300	187964000	6925000	230987700	89477300	91914700	429563000	401410000	452477000	77923000	124207000	441774300	413767200	60564700	1095808500	233146600	658310900	693129000	143308900	177422200	56628900	216996400	100667700	452893000	219834200	165222800	324164600	216618300	115091000	282306400	72508300	70614990	348210320	53882570	177494000	79042100	118137100	496798800	20353100
ALDH16A1	Q8IZ83;Q8IZ83-3	Aldehyde dehydrogenase family 16 member A1	0	0	0	0	0	0	0	0	0	0	0	0	0	0	0	0	0	0	0	0	0	0	0	0	0	0	0	0	0	0	0	0	0	0	0	0	0	0	0	951530	923820	11973300	2821000	0	52134400	15915300	0
ALDH1A1	P00352	Aldehyde dehydrogenase 1A1	0	0	0	0	43010200	52230400	0	0	137827150	0	53157880	0	43055700	8110900	0	42698200	0	0	0	177648	0	12088500	0	23248000	82932266	0	0	50165103	1380300	400468836	5830500	7869210	1100400	101144040	0	0	90897600	93729400	56810890	94123700	1069543358	291958900	189846470	198787650	1128402481	57778918	0
ALDH1L1	O75891;O75891-2;O75891-3;O75891-4	Cytosolic 10-formyltetrahydrofolate dehydrogenase	0	0	0	0	0	0	0	0	0	0	0	0	0	0	0	0	0	0	0	0	0	0	0	0	0	0	0	103098800	2600900	0	1698600	22251500	3753400	11924400	0	0	0	0	0	0	0	0	0	0	0	0	0
ALDH2	P05091;P05091-2	Aldehyde dehydrogenase, mitochondrial	0	0	0	0	0	0	0	0	224850	0	973520	0	0	0	0	0	0	0	0	40725252	0	0	21947000	0	70891634	0	0	780371197	59270600	463356264	2708200	236154490	6874100	28555160	15146900	0	0	0	0	0	613282	0	0	0	633719	1512	0
ALDH3A1	P30838	Aldehyde dehydrogenase, dimeric NADP-preferring	0	0	0	0	0	0	0	0	0	0	0	0	0	0	0	0	0	0	0	0	0	0	0	0	0	0	0	0	0	0	0	0	0	0	0	0	0	0	0	0	1019200	0	0	0	36466760	0	0
ALDH4A1	P30038;P30038-2;P30038-3	Delta-1-pyrroline-5-carboxylate dehydrogenase, mitochondrial	0	0	0	0	0	0	0	0	0	0	0	0	0	0	0	0	0	0	0	0	0	0	0	0	21490000	0	0	110071100	7747800	90597000	1189300	30323200	5084900	0	0	0	0	0	0	0	0	0	0	0	0	0	0
ALDH5A1	P51649;P51649-2	Succinate-semialdehyde dehydrogenase, mitochondrial	0	0	0	0	0	0	0	0	0	0	0	0	0	0	0	0	0	0	0	0	0	0	0	0	19902000	0	0	96142000	22877700	101097500	0	45137700	0	0	0	0	0	0	0	0	2812200	201480	0	0	0	85366400	0
ALDH6A1	Q02252;Q02252-2	Methylmalonate-semialdehyde dehydrogenase [acylating], mitochondrial	0	0	0	0	0	0	0	0	0	0	0	0	0	0	0	0	0	0	0	0	0	0	0	0	31426900	0	0	274097700	14486400	363361000	4608600	140623000	5575200	5198900	0	0	0	0	0	0	0	0	0	0	10814000	13004900	0
ALDH7A1	P49419;P49419-2;P49419-4	Alpha-aminoadipic semialdehyde dehydrogenase	0	0	0	0	0	0	0	0	0	0	0	0	0	12413200	0	0	0	0	0	15150000	0	2108700	12434000	0	22481000	0	9061700	296593000	4926100	314807000	17787500	87109500	1771700	9097400	0	0	426120	0	0	0	1440300	25120000	0	982490	17720400	0	0
ALDH9A1	P49189;P49189-2;P49189-3	4-trimethylaminobutyraldehyde dehydrogenase	0	0	0	0	0	0	0	0	0	0	0	0	0	0	0	0	0	0	0	0	3831300	14513000	0	7613100	0	0	0	250878000	37650200	155400000	25636400	110042300	33717400	100127600	0	0	12145900	3490670	61764100	130765700	115517300	1048316000	47432630	49123650	295467900	311386000	0
ALDOA	P04075;P04075-2	Fructose-bisphosphate aldolase A	1019696077	99527627	322096776	810296587	538267419	696444519	1139692142	378490104	783303228	2504379237	1023235479	1047436508	687778057	1007495799	1358817965	1201501650	767743128	386754029	400713012	970520289	1881665027	1122974778	1429402001	910005710	2116504566	1131362481	856158394	3491453099	3665989935	3747453800	734706467	3501963550	1524068814	1637455162	552293262	496516239	648704091	345973272	493447342	807187501	542805865	653728491	808244909	441765942	1740882438	15498505359	265162000
ALDOB	P05062	Fructose-bisphosphate aldolase B	683613	362537	24226372	2757323	69984	1657528	96625	309706	18835986	89779	521806	348188	14376148	30319	315486	0	1796387	972601	0	0	0	0	0	0	0	0	0	0	0	0	0	0	0	0	0	0	226018	645148	343137294	405661	41607607	339515	19204772	508169	351961406	12423386	0
ALDOC	P09972	Fructose-bisphosphate aldolase C	751423509	264186836	138451452	350771890	622593297	620978652	752532333	393712690	202922686	485828884	171615415	796287804	68682895	372840483	604564349	469306350	725447885	450142170	380896688	1179862011	983944373	390420482	1593929899	843598890	2144913834	951419619	445147306	2532487701	1171141865	1853450900	603106733	1867381350	728152586	876398138	613078938	628123261	403173690	277376380	263325014	874644438	473441748	554955464	297410019	259268039	639359656	2243651655	322920600
ALPL	P05186;P05186-2;P05186-3	Alkaline phosphatase, tissue-nonspecific isozyme	0	0	0	0	0	0	0	0	0	0	0	0	0	0	0	0	0	0	0	0	0	0	0	0	0	0	0	0	0	0	0	0	0	0	0	0	0	0	0	0	0	0	9234600	0	0	0	0
ALYREF	Q86V81	THO complex subunit 4	0	0	0	0	0	0	0	0	0	14290300	0	0	0	0	0	0	0	0	0	0	0	0	0	0	0	0	0	0	0	0	0	0	0	0	0	0	0	0	915480	3978200	4797900	13678000	0	0	1753960	85161400	0
AMBP	P02760	Protein AMBP	793912800	1457726000	1917248700	3442354000	1046333100	166062300	2376502090	2719910500	717094500	733655000	528697700	1644796000	1738053000	1059984400	2532930000	3417152000	1443138000	840230000	2766149000	1062730700	1947034000	1199430000	5558312900	5581220000	2394425800	2565250000	1587989500	492260500	411082900	1692855080	1078819300	2793234000	1094115000	2122370000	1396324000	2943218180	3189991800	9197416000	11040659000	3625437900	5373494000	5635289700	13800252000	18802315100	5354011900	4655272000	216919800
AMER2	Q8N7J2;Q8N7J2-2	APC membrane recruitment protein 2	0	0	0	0	0	0	0	0	0	0	0	0	0	0	0	0	0	0	0	0	0	0	0	0	0	0	0	21711600	0	49818500	0	5789600	0	0	0	0	0	0	0	0	0	0	0	0	0	0	0
AMPD3	Q01432;Q01432-2;Q01432-3;Q01432-4;Q01432-5;Q01432-6	AMP deaminase 3	0	0	0	0	0	0	0	0	0	0	0	0	0	0	0	0	0	0	0	0	0	0	0	0	0	0	0	0	0	0	0	0	0	0	0	0	0	0	0	1036800	0	18515000	0	0	41270700	0	0
AMPH	P49418;P49418-2	Amphiphysin	0	0	0	0	0	0	0	0	0	0	0	0	0	0	0	0	0	0	0	0	3413800	0	0	0	6467300	0	5332100	175330333	55197584	150997070	75420	66763702	0	0	0	0	0	0	0	7681870	0	43757000	9337800	19572400	4950570	119717000	0
ANG	P03950	Angiogenin	45392000	31959000	31305000	0	83051300	0	12477000	13181000	25978000	29957300	0	9252800	0	90737000	0	17217000	0	74975000	27643000	46561000	114588000	55350000	94730000	65912200	63463000	50209000	47495000	10562500	9280800	19628400	21192000	104507000	52736000	40637500	25868600	143108000	2648248000	2792293900	2694757500	5776717800	2700751700	2200172000	3242078700	3418662500	3115231000	694499400	0
ANGPT2	O15123;O15123-2;O15123-3	Angiopoietin-2	0	0	0	0	0	0	0	0	0	0	0	0	0	0	0	0	0	0	0	0	0	0	0	0	0	0	0	0	0	0	0	0	0	0	0	0	14050000	18842300	9774200	7486800	1804500	16757600	33691000	3549000	2590700	0	0
ANGPTL1	O95841	Angiopoietin-related protein 1	0	0	0	0	0	0	0	0	0	0	0	0	0	0	0	0	0	0	0	0	0	0	0	0	0	0	0	0	0	0	0	0	0	0	0	0	23113522	31326953	23981656	23592041	22417734	24616822	9734782	68833099	34283508	3523183	0
ANGPTL2	Q9UKU9;Q9UKU9-2	Angiopoietin-related protein 2	0	0	0	0	0	0	0	0	0	0	0	0	0	0	0	0	0	0	0	0	0	0	0	0	0	0	0	0	0	0	0	0	0	0	0	0	214732878	152777547	91921084	109593859	116528206	47679778	217993618	106341701	87764392	8529757	0
ANGPTL3	Q9Y5C1	Angiopoietin-related protein 3	0	0	0	0	0	0	0	0	0	0	0	0	0	0	0	0	0	0	0	0	0	0	0	0	0	0	0	0	0	0	0	0	0	0	0	0	370277100	585028600	385599100	283073700	249609300	4011000	95570600	642106700	179720400	269650	0
ANGPTL4	Q9BY76;Q9BY76-2;Q9BY76-3	Angiopoietin-related protein 4	0	0	0	0	0	0	0	0	0	0	0	0	0	0	0	0	0	0	0	0	0	0	0	0	0	0	0	0	0	0	0	0	0	0	0	0	7881160	8467100	36262810	126173900	64715300	58597400	74750000	39628800	21840500	4122050	0
ANGPTL7	O43827	Angiopoietin-related protein 7	0	0	0	0	0	0	0	0	0	0	0	0	0	0	0	0	0	0	0	0	0	0	0	0	0	0	0	0	0	0	0	0	0	0	0	0	12341200	24809400	1101000	23295100	11709210	4899700	9108600	13640800	6999700	0	0
ANK1	P16157;P16157-10;P16157-11;P16157-12;P16157-13;P16157-14;P16157-15;P16157-16;P16157-2;P16157-21;P16157-3;P16157-4;P16157-5;P16157-6;P16157-7;P16157-8;P16157-9	Ankyrin-1	0	0	133730000	0	0	66621400	0	0	75279600	0	77354300	0	92464200	0	0	150876800	0	0	0	0	984335900	0	7495150400	32941400	26999288605	16834100	483724200	34173400865	89252540	71065136629	2734689587	3876009627	126912512	4500383550	2702200	7084100	2635300	0	2087400	1718616436	11539980	7730507254	12219060	171499771	8727907549	39270160	2017000
ANK2	Q01484;Q01484-2;Q01484-5;Q01484-7	Ankyrin-2	0	0	0	0	0	0	0	0	0	0	0	0	0	0	0	0	0	0	0	7394400	0	0	35438000	0	39443095	0	0	157656835	76014900	204079661	1865313	18393673	31758	65050	5538300	0	0	0	800730	105062754	0	401301546	0	5668929	31157021	13127000	0
ANKFY1	Q9P2R3;Q9P2R3-2;Q9P2R3-4	Rabankyrin-5	0	0	0	0	0	0	0	0	0	0	0	0	0	0	0	0	0	0	0	0	0	0	0	0	0	0	0	16715900	0	41482100	0	0	0	0	0	0	0	0	0	0	3419300	17031560	0	0	40575800	10954500	0
ANKRD11	Q6UB99	Ankyrin repeat domain-containing protein 11	0	0	0	0	0	0	0	0	0	0	0	0	0	0	0	0	0	0	0	0	0	0	0	0	0	0	0	0	0	0	0	0	0	0	0	0	4887500	3416700	11932000	123570000	16860000	24263900	6664900	88377000	61377000	6396200	0
ANLN	Q9NQW6;Q9NQW6-2	Anillin	0	0	0	0	0	0	0	0	0	0	0	0	0	0	0	0	0	0	0	0	0	0	0	0	0	0	0	397537800	0	355061000	0	70638300	0	0	0	5523900	0	0	0	0	0	0	0	0	0	0	0
ANP32A	P39687	Acidic leucine-rich nuclear phosphoprotein 32 family member A	0	0	0	0	0	0	0	0	0	357860500	10462000	0	0	0	0	0	0	0	0	0	0	0	0	0	0	0	0	0	201408400	0	0	0	3332700	47077000	0	0	0	0	39278230	5183000	83608681	163684594	35699431	6615590	61085265	4761410317	0
ANP32B	Q92688;Q92688-2	Acidic leucine-rich nuclear phosphoprotein 32 family member B	0	0	0	0	0	0	0	0	0	0	0	0	0	0	0	0	0	0	0	0	0	0	0	0	0	0	0	0	22520000	0	0	0	0	1188600	0	0	0	0	3437170	5183000	2062519	12114306	626869	558010	3466635	367334683	0
ANP32E	Q9BTT0;Q9BTT0-3	Acidic leucine-rich nuclear phosphoprotein 32 family member E	0	0	0	0	0	0	0	0	0	0	0	0	0	0	0	0	0	0	0	0	0	0	0	0	0	0	0	0	22009000	0	0	0	0	0	0	0	0	0	0	0	0	0	0	0	0	0	0
ANTXR1	Q9H6X2;Q9H6X2-2;Q9H6X2-3;Q9H6X2-4;Q9H6X2-5;Q9H6X2-6	Anthrax toxin receptor 1	0	0	0	0	0	0	0	0	0	0	0	0	0	0	0	0	0	0	0	0	0	0	0	0	0	0	0	0	0	0	0	0	0	0	0	0	20483600	23543200	13136100	16136700	20402700	1704300	28892800	20003800	11783800	4181200	0
ANXA1	P04083	Annexin A1	0	0	0	0	0	0	0	0	0	0	0	0	0	0	0	0	0	0	0	17749000	1011553700	298656700	10938000	22399800	694361000	78160800	32900700	13615504000	20967000	1163685500	1087063900	3878378300	1607368300	1403214600	38837400	3623800	426700	8233720	18171000	0	14529520	42328100	25777910	0	126193600	771330	2304600
ANXA11	P50995;P50995-2	Annexin A11	0	0	0	0	0	0	0	0	0	0	0	0	0	0	0	0	0	0	0	4791000	30415100	94185800	2531700	12808900	4785200	0	20252300	258741000	26860800	91824900	22449600	56167300	25535900	32141800	0	0	2172490	43199900	396150500	0	98326000	8348400	4501100	37074020	331024100	13713180	4701300
ANXA2	P07355;P07355-2	Annexin A2	0	0	3181400	0	0	0	0	0	0	24588300	0	0	0	7547700	0	0	0	0	0	138430100	1807140700	536039200	1050337000	307997500	93594100	221329900	704120200	1656592500	78020800	348944000	288287300	787523000	611736700	479030000	93704700	91772800	20668300	42471400	206090300	25982300	125737000	24000300	68104800	38200770	148972000	20967480	111606000
ANXA3	P12429	Annexin A3	0	0	0	0	0	0	0	0	0	0	0	0	0	0	0	0	0	0	0	0	0	0	0	0	0	0	0	0	0	0	0	0	0	0	0	0	0	0	0	0	0	0	0	0	0	0	0
ANXA4	P09525;P09525-2;P09525-3	Annexin A4	0	0	0	0	0	0	0	0	0	0	0	0	0	0	0	0	0	0	0	12321000	220522700	966867600	89144300	168797700	149519000	5110500	104669200	1604843700	26388300	304678000	64096200	338913000	914706000	156573900	11345000	41330700	638790	29247300	388966200	3722830	68842300	2732280	2290530	6793200	299938600	3141540	2240900
ANXA5	P08758	Annexin A5	0	0	0	0	0	0	0	0	0	0	0	0	0	23290300	0	0	0	0	0	58995400	958602500	745611600	116530100	249305800	391641000	47370400	322813000	4617101000	124027540	1784954500	627738400	1595266900	1215462200	1330534500	41065400	45479600	10191890	40642700	140637300	9252940	30357510	15966060	16464140	34957500	179666100	38776500	8614700
ANXA6	P08133;P08133-2	Annexin A6	0	0	0	0	0	0	0	0	0	0	0	0	0	0	0	0	0	0	0	74205200	402667000	505316400	44525300	137280700	96709900	44370700	154188300	2444388400	320178200	1369527600	170157700	746334300	562263900	296331500	39129900	8676100	7067140	37479730	211435100	9879200	71293700	22612870	18320660	33549600	166644900	138618900	2693510
ANXA7	P20073;P20073-2	Annexin A7	0	0	0	0	0	0	0	0	0	0	0	0	0	0	0	0	0	0	0	1457700	18666200	29746100	5613100	0	159700000	0	17542300	561157000	20390100	728868600	31223100	86357800	39073400	55210500	0	0	1445300	12644400	46700100	0	19082040	7245200	0	3666060	72183400	4284300	2540600
AP1B1	Q10567;Q10567-2;Q10567-3;Q10567-4	AP-1 complex subunit beta-1	0	0	0	0	0	0	0	0	0	0	0	0	0	0	0	0	0	0	0	0	293282	0	0	0	0	0	0	2486946	319477	20667450	0	13416	196331	0	0	0	10960945	5146709	34326871	31546648	70029472	113662471	24772150	5527245	184130527	88702293	0
AP1M1	Q9BXS5;Q9BXS5-2	AP-1 complex subunit mu-1	0	0	0	0	0	0	0	0	0	0	0	0	0	0	0	0	0	0	0	0	0	0	0	0	0	0	0	0	0	0	0	0	0	0	0	0	0	0	0	0	515630	5380200	0	0	9276500	14529400	0
AP2A1	O95782;O95782-2	AP-2 complex subunit alpha-1	0	0	0	0	0	0	0	0	0	0	0	0	0	0	0	0	0	0	0	0	918092	5868879	6266200	3715800	3144000	0	2044700	189924932	33608145	238079046	1422800	41732380	2056350	1634300	3243600	0	25311927	7935700	12971584	38287524	15556156	184521945	19507469	6495900	173169837	12114124	0
AP2A2	O94973;O94973-2;O94973-3	AP-2 complex subunit alpha-2	0	0	0	0	0	0	0	0	0	0	0	0	0	0	0	0	0	0	0	0	3945308	2076121	0	0	3144000	0	0	83309568	22357955	55839054	1422800	3645120	2056350	1634300	0	0	11297623	752600	16185456	30972826	44867814	125777655	13823641	2498800	79283063	13663686	0
AP2B1	P63010;P63010-2;P63010-3	AP-2 complex subunit beta	18618400	0	0	31025700	0	0	13517000	0	3247700	0	0	0	0	0	13229000	22427700	709220	0	6171000	161938800	77798918	30687600	118946000	44657500	57466500	109214300	45370200	204146254	84612423	248239650	42167300	116033984	71987569	46747200	69910100	24583500	15945625	12317921	17239419	29221552	35468088	149444289	22259150	7960745	156310973	31002207	8670000
AP2M1	Q96CW1;Q96CW1-2	AP-2 complex subunit mu	0	0	0	0	0	0	0	0	0	0	0	0	0	0	0	0	0	0	0	0	0	0	0	0	2936000	0	0	84712100	12541500	59195400	0	4806300	0	0	0	0	0	0	11326510	22211500	21580010	189936200	2948710	3119180	103121500	6348400	0
AP2S1	P53680;P53680-2	AP-2 complex subunit sigma	0	0	0	0	0	0	0	0	0	0	0	0	0	0	0	0	0	0	0	0	0	0	0	0	0	0	0	0	0	0	0	0	0	0	0	0	0	0	512520	12679100	4060170	49460900	1825900	0	36394500	3397400	0
AP3B2	Q13367;Q13367-3;Q13367-4	AP-3 complex subunit beta-2	0	0	0	0	0	0	0	0	0	0	0	0	0	0	0	0	0	0	0	9385500	24194000	21546000	0	6391100	21135000	15528000	9631400	25867000	15013400	37653000	15230000	20495000	7974700	10147000	7806000	21174000	0	0	0	0	0	0	0	0	0	0	0
AP3D1	O14617;O14617-2;O14617-3;O14617-4;O14617-5	AP-3 complex subunit delta-1	0	0	0	0	0	0	0	0	0	0	0	0	0	0	0	0	0	0	0	0	414640	0	1928600	0	2027000	0	0	38665400	9512400	38719000	0	2837500	1019400	0	0	0	0	0	0	0	0	0	0	0	0	0	0
APCS	P02743	Serum amyloid P-component	0	0	0	0	0	0	0	270217000	0	0	0	0	0	0	0	0	0	0	0	63023600	135569000	126548000	40221000	386683000	186115000	216754000	63989000	167458000	21765400	178600000	31756100	161811000	27682500	103298000	53939200	102751000	152372000	136892200	367929300	83166900	136832000	117257400	429894000	392445900	37761200	40642100	0
APEH	P13798	Acylamino-acid-releasing enzyme	0	0	0	0	0	0	0	0	43882700	4490100	91997900	0	20728500	0	0	16825200	0	0	0	2509600	2241400	0	0	0	9915100	3336300	5758400	73456400	40984600	293345900	0	5888400	0	8485500	0	0	0	2786700	0	89140650	0	515039800	0	0	799702300	116887900	0
APEX1	P27695	DNA-(apurinic or apyrimidinic site) endonuclease	0	0	0	0	0	0	0	0	0	14134800	0	0	0	0	0	0	0	0	0	0	3986300	0	0	3516700	0	0	0	0	69716000	0	0	17176000	0	6740900	0	0	5002735650	375580	84015200	25629000	94950200	121802400	52821600	1344900	86521700	2442558000	0
API5	Q9BZZ5;Q9BZZ5-1;Q9BZZ5-2;Q9BZZ5-3;Q9BZZ5-5;Q9BZZ5-6	Apoptosis inhibitor 5	0	0	0	0	0	0	0	0	0	0	0	0	0	0	0	0	0	0	0	0	0	0	0	0	0	0	0	0	0	0	0	0	0	0	0	0	0	0	391680	0	7553800	15539700	4419680	0	1977410	99131500	0
APIP	Q96GX9;Q96GX9-3	Methylthioribulose-1-phosphate dehydratase	0	0	0	0	0	0	0	0	0	0	0	0	0	0	0	0	0	0	0	0	0	0	0	0	0	0	0	0	0	0	0	0	0	0	0	0	0	0	0	0	0	0	0	0	0	22790000	0
APLP1	P51693;P51693-2	Amyloid beta precursor like protein 1	16671124770	4317141900	4833857800	21302104400	7821061600	5962307880	15560086300	4290594500	3155915800	3778695900	678870900	4026365400	1223658900	3810645300	12669990800	7534311600	15970092000	8349568800	5806115780	22413230500	10276203400	3842519700	41164886000	12354998200	17109780500	24794046500	8349874000	3236132300	2814838800	1140777200	5104798910	25923949200	12825901000	7957883200	18274873500	10674031400	184102838300	36069466400	67830613000	293017985000	104790276400	77601785300	168367627600	86097230600	40389211600	38710343700	9150648300
APLP2	Q06481;Q06481-2;Q06481-3;Q06481-4;Q06481-5;Q06481-6	Amyloid beta precursor like protein 2	779706439	385550300	168033274	440067043	544706800	87037448	1047848731	256242683	100826017	73169035	6700600	271349224	45447570	79865506	601638887	482025744	1715375538	268365106	349991755	792976000	359147658	34582600	873531444	395313300	671886006	947355864	219671768	48720100	29124600	16671700	61791600	462739370	278195231	59273800	731120428	179298223	12276976666	6370190815	3420401866	11674892000	7906338317	4167703512	12893489654	8425181248	3041396201	1812743728	82528000
APMAP	Q9HDC9;Q9HDC9-2	Adipocyte plasma membrane-associated protein	0	0	0	0	0	0	0	0	0	0	0	0	0	0	0	0	0	0	0	1533300	14376000	0	0	0	55223400	0	0	269209700	0	122627700	0	48664100	14758800	3072900	0	2831700	45877400	43386600	54107500	5253100	49567140	83864300	109800900	166183000	65145860	5411950	0
APOA1	P02647	Apolipoprotein A-I	16943297900	25493206500	65357837100	42033829300	16980239800	36582556300	77073726700	113108664100	19420817400	2868336900	30054503400	78655891000	42912577600	7211248000	48903602100	64412197600	42956984300	19393542600	83338611400	10606606600	22581851380	12466275600	31346442100	42726544820	24259286700	33792032100	18374579500	3210029500	1522328300	11505775260	10155758100	25198246900	9242572200	19055804570	9873372500	28125370700	105927930300	274245635340	322366325540	73443478600	162452477580	95255486600	210944066600	272301798300	190309805590	72931649300	2878930300
APOA2	P02652	Apolipoprotein A-II	4310447300	5374289600	6699491600	6344501000	4039815000	2313620400	7769586000	14571324000	2484976100	441161000	2176057600	4497509100	12699009400	2485296500	3451850000	7241250000	14287187900	4890279000	11840958000	8926439000	10664577000	7785532000	13148137200	31542691000	11408961000	19191036600	7048718000	2941550800	1399731050	12408410000	8292338000	11698053000	5717525800	14464856000	9158658000	16192841000	24045913700	50123321000	101705145000	20930630300	42112794000	30724412100	39270556000	63562759000	28972830000	7372721600	1397550900
APOA4	P06727	Apolipoprotein A-IV	2512685100	4345458100	5871952000	7331724000	1895983800	2369612900	8429939000	7735574400	3520755000	79670400	3275303000	6987088400	3768736500	1264883700	5371876000	16338995000	6172157000	3471013000	11283547600	3927508300	11411908100	3048990200	14155151000	14136869000	4949539000	6191177000	6861282500	1520315900	182094500	5658250700	3209334600	6171578300	2588073400	9018676200	1841641300	9841218110	47941476600	93251600000	84439274900	135433944000	46916744000	29273886000	151300711210	133301978000	49898530400	5680559000	1196685500
APOB	P04114	Apolipoprotein B-100	18864800	0	511575600	252423000	4747000	330275600	190367700	6834545300	189411200	0	241718800	77649000	4329491600	121415800	356464800	115515500	0	9744700	50141400	167264200	893472100	675147100	736692100	22710706200	1236814900	726319100	225428800	174610600	17778540	765902300	293669750	1166168700	442284900	9019638300	0	195435200	8960667020	5114809670	41690594200	62017037600	9125657440	40463342370	33578212600	56382166420	33920773350	1742937420	0
APOC1	P02654	Apolipoprotein C-I	7103400	0	136833000	48894000	0	54685000	49867000	523230000	0	0	21131300	138934000	18705000	0	48123000	0	71605000	0	173220000	31928000	79829500	30589600	12879000	184320000	69793100	55214000	57968200	8158200	0	22892000	24647700	99143000	9823500	78797300	8725800	74002900	289501000	765328000	876696000	428470100	484258200	357276200	688207000	893317000	618596000	110903000	21983600
APOC2	P02655	Apolipoprotein C-II	20273200	28900000	134663000	74934700	205032800	272107700	237570900	284844000	10532400	0	107853900	57235000	179241000	10075000	70611000	89446000	223070000	42211000	135796000	384637000	1616641900	830536900	546459000	5472487000	1483959300	2311839000	1663350000	219598900	8374000	318794000	442310600	2188739800	530157900	3755129900	381716000	1179826200	2796020000	5596350000	8872300000	12382800000	8603130000	11977600000	22704800000	14697200000	5485680000	378420000	88688000
APOC3	P02656	Apolipoprotein C-III	153786800	206560000	757025000	315680000	484465000	235837000	921760000	1343070000	282492000	23167000	271345000	340768000	592261000	114951000	350437000	1543159000	336309000	163585000	951024800	981698300	3698305900	1664776300	3049740000	7593393000	2427442000	3918794000	1722569400	860071200	53056200	1585591100	565018000	2236124000	681427000	7054621000	430285000	2259648900	4251348000	7024774000	19741173000	17710700000	14634510000	7324460000	23589212000	23490210000	7371880000	415864900	158015000
APOD	P05090	Apolipoprotein D	20496153800	18951094000	34244266000	29060813000	27750025000	14720170000	23918680000	41657619000	40011942000	12509857400	4391934000	52125314000	20477917700	7357608000	29236787000	55321013000	25931273000	16810479000	30535217000	47317395000	76623550000	51251050700	64439538000	64563696000	60049400000	38361196000	61570417000	34692148000	20000875900	13554714000	58109499400	67686328000	45689473200	62953302200	27192295300	42330320400	121873063000	134889104500	180526177000	116475947600	176368016400	113324060900	150223253000	226152864200	203224527700	101506099500	12260383700
APOE	P02649	Apolipoprotein E	93411182700	30279054300	66385938000	84428656300	90692942700	88542024400	114108192600	64315906500	66811025280	16370800200	6511105100	99948538300	58542618670	10422319800	67548797100	121444770000	100591116300	48685923100	54064968500	51496683020	27542297700	18072651750	83019486440	48481990400	75233874500	52084311500	28434889740	17400440850	6928749100	5223313800	20946603500	39161645300	15975461200	27895127300	35113788000	25263203220	769524999300	597555284520	593635558610	786619703200	859902895560	671757471000	822732784900	759498837400	776834944900	216974635100	24089285900
APOF	Q13790	Apolipoprotein F	13008400	0	23859700	47523000	0	8291900	0	57614000	0	0	6488900	19406000	23517000	0	0	0	0	0	38850000	32574600	91773400	38264800	51534200	142799800	86838900	56572400	55467400	3883300	0	13858400	10115400	91881000	8171400	22648700	4589000	24624700	67223000	45397520	138049300	344287000	25117000	189739000	158557000	321299800	78088190	9690600	0
APOH	P02749	Beta-2-glycoprotein 1	7325588900	9927661000	15199322400	9028716000	12478514000	436090000	12605053000	12861187000	6857948000	3066716600	1725893000	9780136000	5223748300	6950573000	9030178000	15112888000	13551082800	8677687000	17417861000	6128634300	9895796000	7988637000	16832516000	29324312000	9170204000	13817942000	4793920000	2532595900	1250248000	3857514700	3559813900	11944885500	5499155000	8986476600	7517358000	17689953000	6119671800	10846522000	14418341100	6132259400	12350914500	6435915000	10437090870	8518421490	10588938000	18510139400	420552900
APOL1	O14791;O14791-2;O14791-3	Apolipoprotein L1	27382600	47285700	171353000	25011000	61599000	88971400	58442000	211035000	10042000	312710	123703400	52059500	185219000	21868500	99281400	63587000	9910200	28912000	98332000	45304000	88893100	77323000	110216000	259053000	105728200	97979700	45191100	3996700	0	237933300	40654000	27633000	54437930	128531100	42845100	78828800	251170800	697546600	1833893000	431638000	799625800	467590800	911057000	1126818000	340606900	74785400	11187800
APOM	O95445;O95445-2	Apolipoprotein M	0	23325000	83928000	3822600	12957200	0	10162000	134000000	6322900	0	40324000	0	115477000	8417900	26004700	20679000	40464000	9330000	81408000	38601000	142295600	73851500	114856100	390595000	99350900	91224500	61320700	10909600	1501500	165796900	43281600	73950300	27875500	76687600	27997120	149250900	404743000	1251760500	3252183000	580932700	1198163200	541853000	2586518200	2401482000	654957000	115995500	1601400
APOO	Q9BUR5;Q9BUR5-2	MICOS complex subunit MIC26	0	0	0	0	0	0	0	0	0	0	0	0	0	0	0	0	0	0	0	0	0	0	0	0	0	0	0	57343700	2376500	31275000	0	0	0	0	0	0	0	0	0	0	0	0	0	0	0	0	0
APP	P05067;P05067-10;P05067-11;P05067-2;P05067-3;P05067-4;P05067-5;P05067-6;P05067-7;P05067-8;P05067-9	Amyloid-beta precursor protein	8130841861	3911832000	2673026926	5366966957	5836540000	1231894152	7257319869	3127040317	1544294683	2141316565	220813000	3075953276	536280630	1192435594	5200075113	3736903256	8570049062	2868208594	2570327345	6090123800	3533191742	1215971200	8042956956	3505076900	3397780294	6235367976	2075974982	760501700	964041500	384713400	800301000	4924088730	2114060769	1798335000	5672258732	2761331277	162596410464	98414894685	43816436934	161160019200	97380901983	41454497988	143075455546	102036823752	41997644799	23376208972	1431735400
APRT	P07741;P07741-2	Adenine phosphoribosyltransferase	0	0	0	0	0	0	0	0	0	0	0	0	0	0	0	0	0	0	0	2511600	12966400	26103900	9283700	5461400	5484900	0	0	190089100	43099900	104317100	4070800	44839000	15965000	39025900	0	0	0	0	2603200	9728700	3717500	37086200	719300	0	46583100	49973500	0
AQP1	P29972;P29972-2;P29972-3;P29972-4	Aquaporin-1	0	0	0	0	0	0	0	0	0	0	0	0	0	0	0	0	0	0	0	188703000	120099000	1023810000	298950000	892580000	478257000	190922000	696112000	2022870000	68476000	234020000	278632000	883465000	626685000	302960000	142810000	450525000	219430000	397280530	1106642200	117383000	565409000	172221000	245260000	389630400	611614420	205426000	0
AQP4	P55087;P55087-2	Aquaporin-4	0	0	0	0	0	0	0	0	0	0	0	0	0	0	0	0	0	0	0	0	0	4913500	69464000	0	330484700	0	7758500	804819000	75269100	748885000	120336800	404348100	78039660	106481700	0	0	0	0	0	0	0	0	0	0	0	0	0
ARCN1	P48444;P48444-2	Coatomer subunit delta	0	0	0	0	0	0	0	0	0	0	0	0	0	0	0	0	0	0	0	0	0	0	0	0	0	0	0	0	0	0	0	0	0	0	0	0	0	172370	2296470	381100	3226550	7562950	628220	0	15000600	30470700	0
ARF1;ARF3	P84077;P61204;P61204-2	ADP-ribosylation factor 1; ADP-ribosylation factor 3	0	0	0	0	0	0	0	0	0	0	0	0	0	0	0	0	0	0	0	0	2997860	1517309	0	0	0	0	1177167	91630383	1276792	66955481	0	11473642	2899942	0	0	0	52861739	29980607	63926293	108979049	113715226	255850896	118268393	59868771	224387492	162222477	0
ARF4	P18085	ADP-ribosylation factor 4	0	0	0	0	0	0	0	0	0	0	0	0	0	0	0	0	0	0	0	0	2997860	14541149	0	0	0	0	1177167	66554181	3505792	50785029	0	9064269	1815716	0	0	0	7399630	5806550	11159447	12013475	16151921	26013419	18457718	6352815	26368610	25546621	0
ARF5	P84085	ADP-ribosylation factor 5	0	0	0	0	0	0	0	0	0	0	0	0	0	0	0	0	0	0	0	0	5944881	7238141	0	0	0	0	1177167	120319236	17592316	66288690	0	20223789	2899942	6057400	0	0	7399630	6048763	13574061	12013475	17961453	38230685	21639489	6352815	37070599	34043702	0
ARG1	P05089;P05089-2;P05089-3	Arginase-1	0	0	0	0	0	0	0	0	0	14306500	0	0	0	0	0	0	0	0	0	9811600	30313900	6550900	99858000	0	0	1989800	971051000	79909500	7328800	8509600	1121800	106552100	60202200	3934100	2224800	15354400	0	0	0	0	0	0	0	0	0	0	44913000
ARHGAP1	Q07960	Rho GTPase-activating protein 1	0	0	0	0	0	0	0	0	0	0	0	0	0	0	0	0	0	0	0	0	0	0	0	0	0	0	0	0	0	0	0	0	0	0	0	0	0	1365400	4256180	3398030	13451590	28251000	24293700	9802000	54295100	11448800	0
ARHGDIA	P52565;P52565-2	Rho GDP-dissociation inhibitor 1	0	0	0	0	46710300	20960200	0	0	24965000	127471000	15998000	0	8545300	98665000	10327000	98207000	0	4898300	0	15436500	47273000	55947000	30520200	36021300	141035000	31344400	27160700	612611700	78010500	394269000	20226100	297977000	42233000	91806000	3679800	0	33998000	9720600	69024300	24964400	229010400	122554000	82793000	45021000	138327200	1049732000	0
ARHGDIB	P52566	Rho GDP-dissociation inhibitor 2	0	0	0	0	17351000	10819000	0	0	7410200	146899800	20007000	0	19680000	7036600	0	23913000	0	0	0	0	0	19854000	0	0	11935000	0	0	30405000	160008800	40933000	0	0	3582600	43001300	0	0	632260	9732900	65720700	0	136628130	28491100	5388000	15340820	137850700	1734204700	0
ARHGEF2	Q92974;Q92974-2;Q92974-3	Rho guanine nucleotide exchange factor 2	0	0	0	0	0	0	0	0	0	0	0	0	0	0	0	0	0	0	0	0	0	0	0	0	0	0	0	18598000	4565700	10132300	0	0	0	0	0	0	0	0	0	0	0	0	0	0	0	0	0
ARHGEF7	Q14155;Q14155-1;Q14155-2;Q14155-3;Q14155-5;Q14155-6	Rho guanine nucleotide exchange factor 7	0	0	0	0	0	0	0	0	0	0	0	0	0	0	0	0	0	0	0	0	0	0	0	0	0	0	0	0	0	0	0	0	0	0	0	0	0	0	0	0	0	4894000	0	0	6922000	22483800	0
ARL3	P36405	ADP-ribosylation factor-like protein 3	0	0	0	0	0	0	0	0	0	0	0	0	0	0	0	0	0	0	0	65661600	37087200	60311500	57651000	13767000	0	0	10974100	85752100	6577200	40528300	7521900	33790800	9666700	24680100	10815000	0	6564970	16204400	27707500	2475900	14416700	0	0	14452400	38697900	34742400	0
ARL8B	Q9NVJ2;Q9NVJ2-2	ADP-ribosylation factor-like protein 8B	0	0	0	0	0	0	0	0	0	0	0	0	0	0	0	0	0	0	0	0	0	0	0	0	0	0	0	205816700	9626000	102230600	0	0	4652400	3586200	0	0	3108100	0	593590	1253100	3360310	0	0	0	35618400	9618440	0
ARMH4	Q86TY3;Q86TY3-2	Armadillo-like helical domain-containing protein 4	0	0	0	0	0	0	0	0	0	0	0	0	0	0	0	0	0	0	0	0	0	0	0	0	0	0	0	0	0	0	0	0	0	0	0	0	77753200	26206100	8509300	45909000	37344400	23491900	70704000	29673400	20778000	10863000	0
ARMT1	Q9H993	Damage-control phosphatase ARMT1	0	0	0	0	0	0	0	0	0	0	0	0	0	0	0	0	0	0	0	0	0	0	0	0	0	0	0	0	0	0	0	0	0	0	0	0	0	0	1052500	0	2756300	586290	0	0	1296200	111714100	0
ARPC1A	Q92747;Q92747-2	Actin-related protein 2/3 complex subunit 1A	0	0	0	0	0	0	0	0	0	0	0	0	0	0	0	0	0	0	0	0	0	0	0	0	0	0	0	0	0	0	0	0	0	0	0	0	5695329	921720	5116598	17611687	604643	86584912	3351746	2000120	23900246	29718260	0
ARPC1B	O15143	Actin-related protein 2/3 complex subunit 1B	0	0	0	0	0	0	0	0	0	0	0	0	0	0	0	0	0	0	0	0	4173500	16019600	0	0	19040400	1873400	0	7752300	23710100	19806400	0	6225700	3593800	7065700	0	0	25035771	11213000	72473462	62341913	118307817	150966388	147376754	17501880	85412174	130421840	0
ARPC2	O15144	Actin-related protein 2/3 complex subunit 2	0	0	0	0	0	0	0	0	0	0	0	0	0	0	0	0	0	0	0	0	0	0	0	0	0	0	0	0	0	0	0	0	0	0	0	0	6568600	2213400	24535110	11603900	48856110	72655300	41943040	9216430	45991050	138023270	0
ARPC3	O15145	Actin-related protein 2/3 complex subunit 3	0	0	0	0	0	0	0	0	0	0	0	0	0	0	0	0	0	0	0	0	0	0	0	0	0	0	0	0	0	0	0	0	0	0	0	0	5116900	747770	12048000	7633100	25008000	36131000	14404000	835590	14927000	41318900	0
ARPC4	P59998;P59998-2;P59998-3;P59998-4	Actin-related protein 2/3 complex subunit 4	0	0	0	0	0	0	0	0	0	0	0	0	0	0	0	0	0	0	0	8500900	27258600	42096300	12787700	24216200	34430000	12938000	8895100	125296400	31267800	128532000	10628000	44285000	26906000	37747200	0	6456700	7870900	3572750	32041100	10914000	35190400	110356000	18437600	6103400	67179800	135318000	0
ARPC5	O15511;O15511-2	Actin-related protein 2/3 complex subunit 5	0	0	0	0	0	0	0	0	0	0	0	0	0	0	0	0	0	0	0	0	0	0	0	0	0	0	0	0	0	0	0	0	0	0	0	0	2346000	2002900	32421500	10011100	59149200	25023700	33799100	0	17049800	55533500	0
ARPC5L	Q9BPX5	Actin-related protein 2/3 complex subunit 5-like protein	0	0	0	0	0	0	0	0	0	0	0	0	0	0	0	0	0	0	0	0	0	0	0	0	0	0	0	0	0	0	0	0	0	0	0	0	0	0	0	0	0	19951400	0	0	1268910	28335100	0
ARPP19	P56211;P56211-2	cAMP-regulated phosphoprotein 19	0	0	0	0	0	0	0	0	0	0	0	0	0	0	0	0	0	0	0	0	0	0	0	0	0	0	0	0	0	0	0	0	0	0	0	0	0	0	0	0	0	0	0	0	1486927	129068993	0
ARRB1	P49407;P49407-2	Beta-arrestin-1	0	0	0	0	0	0	0	0	0	0	0	0	0	0	0	0	0	0	0	0	0	0	0	0	0	0	0	0	0	0	0	0	0	0	0	0	0	0	3736000	7850900	12941000	26190100	789600	0	9382900	491180	0
ART3	Q13508;Q13508-2;Q13508-3	Ecto-ADP-ribosyltransferase 3	64890100	0	87639600	152310800	5914200	94610900	131940600	19703000	17219000	5152600	0	0	1293900	29383400	96736000	100895000	54102100	63553200	0	110161000	41918000	39938900	269958000	31896700	106481000	190934000	26163800	4035800	0	0	1031500	84577200	98782900	33727700	83467400	41928900	132982600	103843000	115969000	44651800	89923000	73016000	171557000	96319000	114528000	122387200	0
ASAH1	Q13510;Q13510-2;Q13510-3	Acid ceramidase	20298000	12575000	54199000	12763000	0	0	13266000	30645000	0	0	0	15323000	0	7975300	63752000	0	79646000	63021000	33451000	0	0	0	0	0	0	0	0	0	0	0	0	0	0	0	0	0	283283600	546255800	493224100	31057310	550978000	110048800	433198000	219021300	423942800	171379420	0
ASAP1	Q9ULH1;Q9ULH1-2	Arf-GAP with SH3 domain, ANK repeat and PH domain-containing protein 1	0	0	0	0	0	0	0	0	0	0	0	0	0	0	0	0	0	0	0	0	0	0	0	0	0	0	0	0	0	0	0	0	0	0	0	0	0	0	0	0	0	7351300	0	0	15626500	2228800	0
ASGR2	P07307;P07307-2;P07307-3	Asialoglycoprotein receptor 2	0	0	0	0	0	0	0	0	0	0	0	0	0	0	0	0	0	0	0	0	0	0	0	0	0	0	0	0	0	0	0	0	0	0	0	0	0	30322600	67670000	82246900	34096800	30528300	57552700	38813000	72484100	19994400	0
ASL	P04424;P04424-2;P04424-3	Argininosuccinate lyase	0	0	0	0	0	0	0	0	0	0	0	0	0	0	0	0	0	0	0	0	0	0	0	0	0	0	0	0	0	0	0	0	0	0	0	0	3443600	1226100	6105700	8435700	764740	2215600	10910000	0	14932200	1807620	0
ASPA	P45381	Aspartoacylase	0	0	0	0	0	0	0	0	0	0	0	0	0	0	0	0	0	0	0	0	0	0	0	0	0	0	0	84514600	0	128294200	0	16882700	0	0	0	0	0	0	0	0	0	0	0	0	0	0	0
ASPH	Q12797;Q12797-10;Q12797-11;Q12797-2;Q12797-3;Q12797-4;Q12797-5;Q12797-6;Q12797-7;Q12797-8;Q12797-9	Aspartyl/asparaginyl beta-hydroxylase	0	0	0	0	0	0	0	0	0	0	0	0	0	0	0	0	0	0	0	0	0	0	0	0	0	0	0	0	0	0	0	0	0	0	0	0	905032700	618612800	272627300	1835450000	384873600	787028400	861220800	646426200	257856400	16937810	0
ASPN	Q9BXN1	Asporin	0	0	0	0	0	0	0	0	0	0	0	0	0	0	0	0	0	0	0	0	0	0	0	0	0	0	0	0	0	0	0	0	0	0	0	0	17118840	12679390	0	20653600	2071100	5639400	27153200	6251700	0	0	0
ASPRV1	Q53RT3;Q53RT3-2	Retroviral-like aspartic protease 1	0	0	0	0	0	0	0	0	0	0	0	0	0	0	0	0	0	0	0	0	0	0	0	0	0	0	0	0	0	0	0	0	0	0	0	0	28106000	7183800	8282700	24712700	18200900	5798900	45684000	22862800	3972100	1714500	0
ASTN1	O14525;O14525-2;O14525-3	Astrotactin-1	0	0	0	0	0	0	0	0	0	0	0	0	0	0	0	0	0	0	0	0	0	0	0	0	0	0	0	0	0	0	0	0	0	0	0	0	105535300	54781700	11237900	60565300	48447300	36545200	127186700	52389000	2995800	0	0
ATAD3A	Q9NVI7;Q9NVI7-2;Q9NVI7-3	ATPase family AAA domain-containing protein 3A	0	0	0	0	0	0	0	0	0	0	0	0	0	0	0	0	0	0	0	0	0	0	0	0	0	0	0	28379000	2171200	4744800	0	0	875690	2221100	0	0	0	0	0	0	0	0	0	0	0	0	0
ATF6B	Q99941;Q99941-2	Cyclic AMP-dependent transcription factor ATF-6 beta	0	0	0	0	0	0	0	0	0	0	0	0	0	0	0	0	0	0	0	0	0	0	0	0	0	0	0	0	0	0	0	0	0	0	0	0	261032600	172618000	97399900	413047000	87744050	272697600	259400800	129035100	87038500	38807000	0
ATG3	Q9NT62;Q9NT62-2	Ubiquitin-like-conjugating enzyme ATG3	0	0	0	0	0	0	0	0	0	0	0	0	0	0	0	0	0	0	0	0	0	0	0	0	0	0	0	0	0	0	0	0	0	0	0	0	0	0	2200220	18850100	3761800	62563400	0	0	58593100	6781700	0
ATIC	P31939;P31939-2	Bifunctional purine biosynthesis protein ATIC	0	0	0	0	0	0	0	0	0	18864600	31578600	0	0	0	0	0	0	0	0	0	0	0	0	0	0	0	0	99960200	27924000	199887800	0	11697200	0	28599500	0	0	0	361190	1486900	115496280	7887890	98829460	4676330	0	523852500	1183595100	0
ATL1	Q8WXF7;Q8WXF7-2	Atlastin-1	0	0	0	0	0	0	0	0	0	0	0	0	0	0	0	0	0	0	0	0	0	0	0	0	0	0	0	25861600	3126100	18304000	0	0	0	1395100	0	0	0	0	0	0	0	0	0	0	0	0	0
ATOX1	O00244	Copper transport protein ATOX1	0	0	0	0	0	0	0	0	0	0	0	0	0	0	0	0	0	0	0	0	0	0	0	0	0	0	0	0	0	0	0	0	0	0	0	0	51200000	35331400	55941000	61510000	41874000	47761000	79561000	50517000	32911000	220929000	0
ATP1A1	P05023;P05023-2;P05023-3;P05023-4	Sodium/potassium-transporting ATPase subunit alpha-1	12945333	8000333	14763585	0	9118333	2096167	11811841	3454667	4955667	15995264	1741933	4792667	0	18318195	5041667	3633000	8870667	23713897	3139333	587289681	4579445014	7040939977	917205190	3382218815	1866990043	848311536	3475232913	11886363911	1571973382	9583919369	1633574162	5491711982	4271619516	2232063415	593046593	1566377607	311974829	1221101835	2325093470	134599286	951696834	173439913	328126325	749968690	1396039759	662477689	8703025
ATP1A2	P50993	Sodium/potassium-transporting ATPase subunit alpha-2	12945333	8000333	4579757	0	9118333	2096167	4694080	3454667	4955667	4209718	1741933	4792667	0	8667952	5041667	3633000	8870667	10136151	3139333	33457197	293543952	647947899	114148624	202800992	673056481	36818948	156094040	3234456080	277092923	3563606690	215289730	829310860	294019730	385901949	38343285	36028291	22784939	119112605	220397117	10707054	112304183	32174576	37831111	63115888	164789284	68391263	706870
ATP1A3	P13637;P13637-2;P13637-3	Sodium/potassium-transporting ATPase subunit alpha-3	12945333	8000333	4579757	0	9118333	2096167	4694080	3454667	4955667	4209718	1741933	4792667	0	8667952	5041667	3633000	8870667	10136151	3139333	58358911	572268936	587940324	122182686	406339894	947487276	105843276	299015048	5235114409	705106693	7020269742	223196208	1805714156	454041554	449317617	62718920	58973872	32623550	165401361	339485002	19368659	143062785	51776301	49171241	99080223	239930157	117407346	3187205
ATP1B1	P05026;P05026-2	Sodium/potassium-transporting ATPase subunit beta-1	17189800	15867300	20552500	9946300	5129600	5217100	13192000	6152200	18851400	3940800	0	0	0	12709000	9894700	17506500	18509700	8128100	0	247264800	2099442000	3606916700	400029000	2034964100	784817400	422587100	1501282900	5119272000	975275800	3284184300	918084400	2827530400	2211719500	1057522000	204725600	680595200	185580200	391727000	929585000	68179900	397298030	117160100	190164600	285923000	558410000	206102100	4017200
ATP1B2	P14415	Sodium/potassium-transporting ATPase subunit beta-2	0	0	0	0	0	0	0	0	0	0	0	0	0	0	0	0	0	0	0	3393900	0	0	0	2713900	80957800	0	0	236175000	23417100	355509600	4626500	84395900	0	0	0	0	0	0	0	0	0	0	0	0	0	0	0
ATP1B3	P54709;P54709-2	Sodium/potassium-transporting ATPase subunit beta-3	0	0	0	0	0	0	0	0	0	0	0	0	0	0	0	0	0	0	0	0	17338000	27651000	0	0	0	3286100	2316300	16262000	40241000	48175000	4537700	5507500	16271300	25448000	0	0	2417300	9895800	6331600	0	11374600	672470	3218700	3706100	5335900	42822700	0
ATP2A1	O14983;O14983-2;O14983-3	Sarcoplasmic/endoplasmic reticulum calcium ATPase 1	0	0	0	0	0	0	0	0	0	0	0	0	0	0	0	0	0	0	0	0	0	0	0	0	200740461	0	0	5488318	0	0	0	0	0	0	0	0	0	0	0	0	0	0	0	0	0	0	0
ATP2A2	P16615;P16615-2;P16615-3;P16615-4;P16615-5	Sarcoplasmic/endoplasmic reticulum calcium ATPase 2	0	0	0	0	0	0	0	0	0	0	0	0	0	0	0	0	0	0	0	0	0	0	0	0	48321539	0	0	128595682	2584500	68083200	0	0	0	0	0	0	0	0	0	0	0	0	0	0	0	0	0
ATP2B1	P20020;P20020-1;P20020-2;P20020-4;P20020-5;P20020-6	Plasma membrane calcium-transporting ATPase 1	0	0	0	0	0	0	0	0	0	0	0	0	0	0	0	0	0	0	0	496427	55575139	115168020	35611181	25075305	140006083	738879	17082107	419275157	50603819	406598881	40491115	125395750	82285671	51149656	4835240	6966196	354563	5725990	15766267	0	4324794	672792	1108428	3028252	9570190	882946	0
ATP2B2	Q01814;Q01814-2;Q01814-3;Q01814-4;Q01814-5;Q01814-6;Q01814-7;Q01814-8	Plasma membrane calcium-transporting ATPase 2	0	0	0	0	0	0	0	0	0	0	0	0	0	0	0	0	0	0	0	496427	165993830	439487230	13065216	123340844	50735641	738879	122250151	576088013	51881477	422488885	30726479	260840496	287209015	91521259	1909308	9947808	514177	5495723	13258204	7838	2775767	104787	1108428	2847681	6295977	686426	0
ATP2B3	Q16720;Q16720-2;Q16720-3;Q16720-4;Q16720-5;Q16720-6;Q16720-7;Q16720-8	Plasma membrane calcium-transporting ATPase 3	0	0	0	0	0	0	0	0	0	0	0	0	0	0	0	0	0	0	0	46277220	495162059	1099804198	30388597	432072100	38766926	31567363	271637770	626981887	53090452	315148806	97036566	354931216	531220458	251237586	31591059	115467700	74388358	137498217	414926184	63814505	177531544	61022078	55186387	57598824	165192204	22959793	0
ATP2B4	P23634;P23634-2;P23634-3;P23634-4;P23634-5;P23634-6;P23634-7;P23634-8	Plasma membrane calcium-transporting ATPase 4	0	0	0	0	0	0	0	0	0	0	0	0	0	0	0	0	0	0	0	496427	63010373	86078452	6572206	10195752	272509650	738879	17082107	861030341	51148361	895846328	52268641	125839338	43612454	57461300	1065663	6966196	590832	7618761	20802943	7838	4324794	672792	1108428	5940444	9570190	882946	0
ATP5F1A	P25705;P25705-2;P25705-3	ATP synthase subunit alpha, mitochondrial	0	0	0	0	0	0	0	0	0	24287500	6175200	0	0	0	0	0	0	0	0	0	56531800	0	0	0	1977272000	0	65968000	7940970900	1214557800	6645104000	245366800	2195467900	274264200	589261600	0	0	0	0	0	0	0	130751820	464360	0	163437830	959123600	0
ATP5F1B	P06576	ATP synthase subunit beta, mitochondrial	0	0	0	0	0	0	0	0	0	78662600	0	0	0	12053000	0	0	0	0	0	0	68439300	2170500	20086000	0	1478015300	0	0	5332061000	852555200	3965012200	146109800	1786812300	295943800	220520700	0	0	0	0	0	0	0	75494500	0	0	100548100	2272165900	0
ATP5F1C	P36542;P36542-2	ATP synthase subunit gamma, mitochondrial	0	0	0	0	0	0	0	0	0	0	0	0	0	0	0	0	0	0	0	0	12360000	0	0	0	96106900	0	0	705033000	88953300	541671000	23585800	96153400	6231500	14863200	0	0	0	0	0	0	0	0	0	0	500910	37281600	0
ATP5F1D	P30049	ATP synthase subunit delta, mitochondrial	0	0	0	0	0	0	0	0	0	0	0	0	0	0	0	0	0	0	0	0	0	0	0	0	71389000	0	0	878700000	300115000	539960000	29232000	259619000	5965400	50633000	0	0	0	0	0	0	0	5891400	0	0	0	76830000	0
ATP5IF1	Q9UII2;Q9UII2-2;Q9UII2-3	ATPase inhibitor, mitochondrial	0	0	0	0	0	0	0	0	0	46827000	0	0	0	0	0	0	0	0	0	0	0	0	0	0	0	0	0	0	0	0	0	0	0	0	0	0	0	0	0	0	0	0	0	0	0	0	0
ATP5ME	P56385	ATP synthase subunit e, mitochondrial	0	0	0	0	0	0	0	0	0	0	0	0	0	0	0	0	0	0	0	0	0	0	0	0	45868000	0	0	370810000	34239700	126622800	0	116949000	6437000	0	0	0	0	0	0	0	0	0	0	0	0	0	0
ATP5MF	P56134;P56134-2;P56134-3;P56134-4	ATP synthase subunit f, mitochondrial	0	0	0	0	0	0	0	0	0	0	0	0	0	0	0	0	0	0	0	0	0	0	0	0	0	0	0	305805000	21021800	58901000	0	8765000	0	0	0	0	0	0	0	0	0	0	0	0	0	0	0
ATP5MG	O75964	ATP synthase subunit g, mitochondrial	0	0	0	0	0	0	0	0	0	0	0	0	0	0	0	0	0	0	0	0	0	0	0	0	65075000	0	0	385267000	32054070	292935600	10101400	105575000	10413000	9299470	0	0	0	0	0	0	0	0	0	0	0	0	0
ATP5PB	P24539	ATP synthase F(0) complex subunit B1, mitochondrial	0	0	0	0	0	0	0	0	0	0	0	0	0	0	0	0	0	0	0	0	0	0	0	0	27562000	0	0	788236100	59591000	364104570	21239800	176613300	10821500	16215900	0	0	0	0	0	0	0	0	0	0	0	0	0
ATP5PD	O75947;O75947-2	ATP synthase subunit d, mitochondrial	0	0	0	0	0	0	0	0	0	0	0	0	0	0	0	0	0	0	0	0	0	0	0	0	55902000	0	0	335150400	61907800	549186100	7515100	90757200	18046000	11590000	0	0	0	0	0	0	0	0	0	0	0	0	0
ATP5PF	P18859;P18859-2	ATP synthase-coupling factor 6, mitochondrial	0	0	0	0	0	0	0	0	0	0	0	0	0	0	0	0	0	0	0	0	0	0	0	0	15773000	0	0	101068000	76981000	84516000	5910100	68603000	6034700	34040000	0	0	0	0	0	0	0	0	0	0	0	30199800	0
ATP5PO	P48047	ATP synthase subunit O, mitochondrial	0	0	0	0	0	0	0	0	0	0	0	0	0	0	0	0	0	0	0	0	0	0	0	0	73937900	0	0	327529900	60692800	409703000	6630400	138489400	11113000	24459100	0	0	0	0	0	0	0	0	0	0	0	0	0
ATP6AP1	Q15904	V-type proton ATPase subunit S1	301416900	86738000	205863000	310241000	120026000	288424000	658690000	118420000	162637000	206864200	10151000	204465000	119753000	0	336224000	352552600	1024942000	333734000	255644000	5280780000	2145479000	1301764000	3877250000	3141640000	4066880000	3450460000	2073755000	641657000	537192000	34143000	1787253000	3573010000	1864088000	1509495000	3314290000	2067080000	16816819000	6594991400	5563530000	16167190000	7437068000	10195038000	14650684000	7330280000	4481887000	966022890	1331245000
ATP6AP2	O75787;O75787-2	Renin receptor	185737100	20278500	58359600	23579100	59033400	175143000	197900000	57026000	47276000	0	0	97811300	41565500	0	136172100	9271500	322243000	100834000	100700000	1177928000	658172400	292547500	1365902500	687377400	1746932000	1367173000	450965900	262492800	0	3986800	174890400	1140550000	343229000	157771400	785839100	703821800	5673067300	2722279000	1744787200	6004593000	2469322500	3975929400	5884867300	2785320400	1509794380	16788960	34582400
ATP6V0A1	Q93050;Q93050-1;Q93050-3	V-type proton ATPase 116 kDa subunit a 1	0	0	0	0	0	0	0	0	0	0	0	0	0	0	0	0	0	0	0	0	600760	0	0	0	25849700	0	0	171511500	31095600	248553500	0	10025550	1507600	0	0	0	0	0	0	0	0	0	0	0	0	0	0
ATP6V0D1	P61421	V-type proton ATPase subunit d 1	0	0	0	0	0	0	0	0	0	0	0	0	0	0	0	0	0	0	0	0	0	0	0	0	24805000	0	0	125007000	22594600	32883300	0	9882600	0	0	0	0	0	0	0	0	0	7079700	0	0	13718800	0	0
ATP6V1A	P38606;P38606-2	V-type proton ATPase catalytic subunit A	0	0	0	0	0	0	0	0	0	0	0	0	0	0	0	0	0	0	0	0	17052700	9914000	0	0	45185100	0	0	460528200	81222300	262961200	0	76481600	2166500	2605300	0	0	0	568590	7773290	47719900	14417380	199410100	4554300	6748200	259441700	345933400	0
ATP6V1B2	P21281	V-type proton ATPase subunit B, brain isoform	0	0	0	0	0	0	0	0	0	0	0	0	0	0	0	0	0	0	0	0	15512200	6203500	0	0	81941000	2713700	0	506853400	86351900	417025000	8646700	71167200	19154100	17795400	0	0	0	0	9508600	63209400	12493700	298992300	13803120	1763950	200887900	225643700	0
ATP6V1D	Q9Y5K8	V-type proton ATPase subunit D	0	0	0	0	0	0	0	0	0	0	0	0	0	0	0	0	0	0	0	0	0	0	0	0	0	0	0	51119800	6748000	20270000	0	0	0	0	0	0	0	0	363060	10172000	0	30756000	0	0	21615100	21286200	0
ATP6V1E1	P36543;P36543-2;P36543-3	V-type proton ATPase subunit E 1	0	0	0	0	0	0	0	0	0	0	0	0	0	0	0	0	0	0	0	0	7533300	9943000	8822300	8944700	39062900	7103100	0	162139600	65082800	206236300	3380200	77306000	7510100	2515900	0	0	0	0	3109300	37830700	3634300	179357700	4750800	0	165378100	288119000	0
ATP6V1F	Q16864;Q16864-2	V-type proton ATPase subunit F	0	0	0	0	0	0	0	0	0	0	0	0	0	0	0	0	0	0	0	0	0	0	0	0	0	0	0	0	31424100	48041000	0	0	0	0	0	0	0	0	0	0	0	0	0	0	0	0	0
ATP6V1G1	O75348	V-type proton ATPase subunit G 1	0	0	0	0	0	0	0	0	0	0	0	0	0	0	0	0	0	0	0	0	0	4891915	0	0	13241000	0	0	42899750	16232500	54132500	3927950	18934000	4135235	7207965	0	0	0	0	0	0	0	0	0	0	0	0	0
ATP6V1G2	O95670;O95670-2;O95670-3	V-type proton ATPase subunit G 2	0	0	0	0	0	0	0	0	0	0	0	0	0	0	0	0	0	0	0	0	0	3015885	0	0	13241000	0	0	42899750	16232500	54132500	2936360	18934000	2355165	4899535	0	0	0	0	0	3280710	0	24285700	0	0	6469700	41911600	0
ATP6V1H	Q9UI12;Q9UI12-2	V-type proton ATPase subunit H	0	0	0	0	0	0	0	0	0	0	0	0	0	0	0	0	0	0	0	0	5132800	3608700	0	0	9152100	0	0	144501000	49696000	139103000	797550	31545000	2174900	9653300	0	0	0	0	2233500	17393500	1176000	86937000	798450	636060	73119800	44291200	0
ATRN	O75882;O75882-2;O75882-3	Attractin	133145600	117831000	134315100	158241000	99252800	18902000	297292600	144661700	69946000	43433300	43320400	231721900	145024600	98567900	219116700	186904100	231080900	88183100	228949100	80741600	69802000	14542000	129203000	145046000	140576000	172991000	18746200	89888600	14791600	33368800	25248800	83593000	52024600	48383100	60787800	79393000	0	0	0	0	0	0	0	0	0	0	74164700
ATXN10	Q9UBB4;Q9UBB4-2	Ataxin-10	0	0	0	0	0	0	0	0	0	0	0	0	0	0	0	0	0	0	0	0	0	0	0	0	0	0	0	0	0	0	0	0	0	0	0	0	0	0	0	0	0	5370800	0	0	0	23877700	0
AXL	P30530;P30530-2	Tyrosine-protein kinase receptor UFO	166603000	98900000	33715000	120921100	85206000	58880000	87710000	53335000	114193000	69847200	0	55565000	27454000	64782000	167569000	55799000	53378000	44991000	0	205342000	106331000	25934500	418112000	164177000	187942000	172435000	44706000	20111500	19883100	12652500	41511950	165086700	117626300	20390500	92939900	52004000	852409700	697448400	535995000	277334000	1158677000	407637000	943827000	743139000	775154900	438905510	40002000
AZGP1	P25311	Zinc-alpha-2-glycoprotein	2847344400	4892801500	9394127000	7308481000	6300480600	1590332000	4567464700	8756847000	6632565500	4884755100	2171328000	9269678000	8845651000	4442365800	6397643900	16961788000	6320370000	2856873000	8227609000	5794157000	11333191000	7674118000	13185764000	14039610000	9214024000	7722133200	5697936600	2268506100	2422018300	2437892000	3922558700	8174414000	5653971800	9236446500	6051540600	8384423000	75840910	222814900	602971260	18018600	312996500	20527700	82759000	232493500	294336000	1777325000	663703000
AZU1	P20160	Azurocidin	0	0	0	0	0	0	0	0	0	0	0	0	6283400	0	0	0	0	0	0	0	0	0	0	0	0	0	0	43890600	0	8160700	0	0	0	1718400	0	0	0	0	0	875240	0	37190000	0	0	125711200	0	0
B2M	P61769	Beta-2-microglobulin	32811030600	10395370500	6487139000	26902811000	2448616300	5433227400	44148849300	13412410400	13211055100	18133230000	1009977900	29327672300	11817093000	6532139000	53891932700	32262800000	35900413000	31807861000	11830900000	31893349900	24304709900	21841400700	59024279300	16139661600	76076227000	35611126300	28417056300	6025764600	19182724300	4427252400	15210426500	37155916900	48302761600	16305899400	24994978500	23552634700	8707801000	11012390000	6092400000	6460600000	13884762000	23647182000	9558708000	13477260000	7792601000	25828451200	4931447700
B3GALNT1	O75752	UDP-GalNAc:beta-1,3-N-acetylgalactosaminyltransferase 1	41553000	0	4966400	0	0	19701200	15133000	0	0	0	0	0	0	0	36116000	9169400	25610000	0	8167300	23674700	5127200	2245100	47557000	3285300	0	0	2379200	0	0	0	1550700	8733700	6951900	1611300	14464000	0	1268520400	360762200	359044300	1336932700	541707300	447004600	1349824600	774845200	322254780	77609800	0
B3GAT1	Q9P2W7;Q9P2W7-2	Galactosylgalactosylxylosylprotein 3-beta-glucuronosyltransferase 1	0	0	0	0	0	0	0	0	0	0	0	0	0	0	0	0	0	0	0	0	0	0	0	0	0	0	0	0	0	0	0	0	0	0	0	0	32962400	16429600	15599400	16968600	26216600	5245800	25969400	22736900	4738000	0	0
B3GAT3	O94766;O94766-2	Galactosylgalactosylxylosylprotein 3-beta-glucuronosyltransferase 3	0	0	0	0	0	0	0	0	0	0	0	0	0	0	0	0	0	0	0	0	6471000	2156400	16009000	6736500	7573500	13398000	3953200	6490600	2480500	0	2403000	21891000	3676000	3657100	11222000	17332000	177718400	99072000	91873600	93426000	153212700	92487900	163680700	130907300	108809450	11372650	0
B3GNT2	Q9NY97;Q9NY97-2	N-acetyllactosaminide beta-1,3-N-acetylglucosaminyltransferase 2	21880000	6235200	0	13894000	5637100	7770800	33217000	0	0	0	0	0	0	0	27464000	0	49067000	2908200	0	51615000	31235300	6066700	26555000	29137800	4737500	34496000	13778000	8660900	0	0	4127700	44311800	13790400	6396400	23257900	28337800	325470000	298261200	219503700	138704700	340333800	109885900	362767000	310546100	214849500	56502400	0
B3GNT7	Q8NFL0	UDP-GlcNAc:betaGal beta-1,3-N-acetylglucosaminyltransferase 7	0	0	0	0	0	0	0	0	0	0	0	0	0	0	0	0	0	0	0	0	0	0	0	0	0	0	0	0	0	0	0	0	0	0	0	0	17269600	11874800	6065300	9675700	9579600	13359800	36987000	7991100	4489240	0	0
B3GNT9	Q6UX72	UDP-GlcNAc:betaGal beta-1,3-N-acetylglucosaminyltransferase 9	0	0	0	0	0	0	0	0	0	0	0	0	0	0	0	0	0	0	0	0	0	0	0	0	0	0	0	0	0	0	0	0	0	0	0	0	105679300	113842300	33205900	39040000	29236700	29096700	41523600	40491200	30253800	1418500	0
B4GALNT1	Q00973;Q00973-2;Q00973-3	Beta-1,4 N-acetylgalactosaminyltransferase 1	0	0	0	0	0	0	0	0	0	0	0	0	0	0	0	0	0	0	0	0	0	0	0	0	0	0	0	0	0	0	0	0	0	0	0	0	209129800	50379780	32542210	136419900	70269700	54636700	139905500	55150780	32357240	0	0
B4GALNT4	Q76KP1	N-acetyl-beta-glucosaminyl-glycoprotein 4-beta-N-acetylgalactosaminyltransferase 1	0	0	0	0	0	0	0	0	0	0	0	0	0	0	0	0	0	0	0	0	0	0	0	0	0	0	0	0	0	0	0	0	0	0	0	0	70294500	14918900	11120500	141668700	8563200	22658600	66815100	31428200	5649100	0	0
B4GALT1	P15291;P15291-2	Beta-1,4-galactosyltransferase 1	9024700	10223000	0	8742800	7755000	28913700	24385000	13881000	5016300	0	0	10571000	12580000	0	26104000	32668000	24723000	13879200	20075100	61157100	70208800	15074900	79402000	49489000	81938300	86559300	34052000	0	4531400	10781800	37915000	143591400	40461400	43189300	52120000	85596100	692180200	357870000	285454000	644788500	399747300	452617500	711553000	563496800	436491100	218776890	1502700
B4GALT2	O60909;O60909-2;O60909-3	Beta-1,4-galactosyltransferase 2	0	0	0	0	0	0	0	0	0	0	0	0	0	0	0	0	0	0	0	0	0	0	0	0	0	0	0	0	0	0	0	0	0	0	0	0	38870700	16907180	14639500	71480000	22933100	16151100	46975000	5011300	16446400	0	0
B4GALT4	O60513	Beta-1,4-galactosyltransferase 4	0	0	0	0	0	0	0	0	0	0	0	0	0	0	0	0	0	0	0	0	0	0	0	0	0	0	0	0	0	0	0	0	0	0	0	0	9309100	30293000	6397000	7993600	5515700	8981400	18598400	15046200	2303400	0	0
B4GAT1	O43505	Beta-1,4-glucuronyltransferase 1	10553663500	4700836100	3212892200	7752395000	4777402000	7237215400	11141424000	3003238500	1781690500	542527000	270341600	4549377400	2190804800	1404284900	11112989000	4410886500	15021490100	3413714600	4048358400	11302347900	7067880500	1970689400	12916139000	7200659190	7859194200	17278153600	3681036090	1559609600	692352300	718372000	3285722400	12947134600	4330047800	1978179800	11361753000	8767378000	28876145800	19737562700	13027508500	9044541300	22857768900	11316376200	31806573000	23656512900	15332293700	4750094700	1810050300
BAG2	O95816;O95816-2	BAG family molecular chaperone regulator 2	0	0	0	0	0	0	0	0	0	0	0	0	0	0	0	0	0	0	0	0	0	0	0	0	0	0	0	0	0	0	0	0	0	0	0	0	198750000	294830000	291390000	273260000	148930000	278530000	366410000	191610000	50943050	31813000	0
BAG3	O95817	BAG family molecular chaperone regulator 3	0	0	0	0	0	0	0	0	0	0	0	0	0	0	0	0	0	0	0	0	0	0	0	0	0	0	0	0	0	0	0	0	0	0	0	0	271550	0	644560	0	0	7132900	0	0	0	12648600	0
BANF1	O75531	Barrier-to-autointegration factor	0	0	0	0	0	0	0	0	0	0	0	0	0	0	0	0	0	0	0	0	0	0	0	0	0	0	0	315147000	148936100	115021000	16329500	36996500	43610200	68259000	0	0	0	0	0	0	0	0	0	0	0	0	0
BASP1	P80723;P80723-2	Brain acid soluble protein 1	359676300	128446200	59203200	5548100	222639300	104221600	177544200	108610600	127596600	961176600	177882100	206408000	24275100	225663100	248800100	105605000	263193000	131725400	63347800	263167000	752853700	334713530	1014019100	465559800	1254355600	386106000	146346220	5601227100	1426634900	5081148000	307121130	2447747000	640052700	641129400	94653540	115314300	210931000	185168000	255058790	228721100	272593610	503318300	266913100	214135300	487252800	3350046000	126941800
BCAM	P50895	Basal cell adhesion molecule	10021000	0	0	13503000	11186000	8865700	0	0	0	0	0	0	0	0	0	6291700	0	36133600	0	9923000	3799200	2525400	60082000	0	151780520	0	2889400	60411600	0	53078000	10998400	33283700	5477800	15134800	0	0	24717200	43068900	50457400	4323140	37422800	8359190	28093000	570310	35689600	49747300	0
BCAN	Q96GW7;Q96GW7-2	Brevican core protein	1880201194	1462287928	539402301	2237344577	1624139031	740779263	3220205896	1018373231	942401431	606092488	258216791	916955853	360705845	488248750	2406580939	497988040	3534773293	833383491	673652422	2764256105	1835522638	492024899	3256397848	1310813879	2372912898	2915309703	946212453	504459700	425140100	502212733	543541176	1604886135	1388602578	305026200	1563986445	864677102	12930582950	9961406145	5122850460	11808619312	10004618910	11007120475	23520862865	10559153086	6578365601	2513713661	1080235946
BCAS1	O75363;O75363-2	Breast carcinoma-amplified sequence 1	0	0	0	0	0	0	0	0	0	0	0	0	0	0	0	0	0	0	0	0	0	0	0	0	0	0	0	785928000	14950500	750134000	5656500	177908000	0	0	0	0	0	0	0	0	0	0	0	0	0	0	0
BCAT1	P54687;P54687-2;P54687-3;P54687-4;P54687-5	Branched-chain-amino-acid aminotransferase, cytosolic	0	0	0	0	0	0	0	0	0	0	0	0	0	0	0	0	0	0	0	0	0	0	0	0	0	0	0	0	0	0	0	0	0	0	0	0	0	0	0	0	5630000	0	0	0	0	21499400	0
BCHE	P06276	Cholinesterase	5777100	0	4484600	0	0	6880200	34673000	0	0	0	14675000	5979300	4903600	0	22353000	4975500	40944000	0	14214300	0	0	0	0	0	0	0	0	0	0	0	0	0	0	0	0	0	22346500	21937800	62793000	16996700	10654500	4714500	31083000	16227300	10611600	13243900	0
BCKDHA	P12694;P12694-2	2-oxoisovalerate dehydrogenase subunit alpha, mitochondrial	0	0	0	0	0	0	0	0	0	0	0	0	0	0	0	0	0	0	0	0	0	0	0	0	0	0	0	0	0	0	0	0	0	0	0	0	0	0	0	0	0	0	0	0	0	28227200	0
BCL2L13	Q9BXK5;Q9BXK5-2;Q9BXK5-4	Bcl-2-like protein 13	0	0	0	0	0	0	0	0	0	0	0	0	0	0	0	0	0	0	0	0	0	0	0	0	0	0	0	35414000	6773400	58682600	0	4076300	0	0	0	0	3908200	0	0	40094000	12349000	13820300	5922800	3550700	5297800	10954800	0
BCL2L2;PABPN1	Q92843-2;Q86U42;Q86U42-2	Bcl-2-like protein 2; Polyadenylate-binding protein 2	0	0	0	0	0	0	0	0	0	0	0	0	0	0	0	0	0	0	0	0	0	0	0	0	0	0	0	0	0	0	0	0	0	0	0	0	0	0	0	0	0	0	0	0	1867500	96333000	0
BCLAF1	Q9NYF8;Q9NYF8-2;Q9NYF8-3;Q9NYF8-4	Bcl-2-associated transcription factor 1	0	0	0	0	0	0	0	0	0	0	0	0	0	0	0	0	0	0	0	0	0	0	0	0	0	0	0	0	0	0	0	0	0	0	0	0	0	0	0	0	0	0	0	0	0	33901000	0
BDH2	Q9BUT1;Q9BUT1-2;Q9BUT1-3	3-hydroxybutyrate dehydrogenase type 2	0	0	0	0	0	0	0	0	0	0	0	0	0	0	0	0	0	0	0	0	0	0	0	0	0	0	0	30585000	3733400	18238000	7536400	0	0	0	0	0	0	0	0	0	0	24670000	0	0	2742110	4663100	0
BDNF	P23560;P23560-2;P23560-3;P23560-4;P23560-5	Brain-derived neurotrophic factor	0	0	0	0	0	0	0	0	0	0	0	0	0	0	0	0	0	0	0	0	0	0	0	0	0	0	0	0	0	0	0	0	0	0	0	0	45118000	5561680	170600	82775600	13314750	894750	60160200	7944600	6878830	225180	0
BGN	P21810	Biglycan	9205300	13353000	26827500	0	0	0	11637000	0	0	0	0	0	0	0	11345000	7794600	0	7161500	10239000	27658000	31899000	25094000	25082000	8697000	44463000	24090000	7526900	12037000	4253400	6974000	4326600	13688000	15413400	8618000	10168000	16034000	1106137700	981533400	1421376500	1232991200	716302640	471439800	1765222000	637588940	243206600	49754400	1967010
BID	P55957;P55957-2;P55957-4	BH3-interacting domain death agonist	0	0	0	0	0	0	0	0	0	0	0	0	0	0	0	0	0	0	0	0	0	0	0	0	0	0	0	0	0	0	0	0	0	0	0	0	19320000	1211400	1795800	0	24169900	11181900	12094300	4552800	42035600	12973000	0
BIN1	O00499;O00499-10;O00499-11;O00499-2;O00499-3;O00499-4;O00499-5;O00499-6;O00499-7;O00499-8;O00499-9	Myc box-dependent-interacting protein 1	0	0	0	0	0	0	0	0	0	0	0	0	0	0	0	0	0	0	0	7534400	872160	0	0	0	57598000	0	0	1225634667	66893216	1688088730	21480080	517588798	27273100	6660900	0	0	62545600	42368300	145485700	265539600	250033000	323228200	223927000	78759600	115479800	93535900	0
BLMH	Q13867	Bleomycin hydrolase	4235800	0	0	0	0	4157600	0	0	8302100	32373900	0	0	0	0	0	9023300	0	0	0	11379600	24900300	4104800	19945000	42477000	3688200	3442400	821088600	51766100	35800900	41236000	0	33039600	12365000	0	0	1929000	0	0	0	0	0	0	0	0	0	53021200	31190600
BLVRA	P53004	Biliverdin reductase A	0	0	0	0	0	0	0	0	0	0	0	0	0	0	0	0	0	0	0	0	0	0	0	0	23731100	0	0	42623400	1715400	45023000	4438900	5505900	3052600	7971800	0	0	11302800	12527200	20065340	69134700	70350900	97048800	32953400	12294400	329878200	13180300	0
BLVRB	P30043	Flavin reductase (NADPH)	0	0	0	65358800	8071600	544565000	0	0	1212806900	0	1314724400	19076800	1095296000	236058000	0	668249000	0	0	0	17811200	78120800	34654500	871113500	59170100	4916243800	22753400	94171900	2489896200	26564900	10269643000	700922600	2047234500	112247000	1738983100	1993400	6232700	18786700	0	34849200	1401055130	345046000	3242504200	154699700	161879000	10118023900	135488790	0
BMP1	P13497;P13497-2;P13497-3;P13497-4;P13497-5;P13497-6	Bone morphogenetic protein 1	0	0	0	0	0	0	0	0	0	0	0	0	0	0	0	0	0	0	0	15222500	7960800	2243500	25101000	0	43490500	37966000	13539100	0	2877200	0	6002000	33207900	13346000	10655900	9894100	22810500	183820000	97335000	80691000	403220000	134685000	167888000	306960000	148217000	62212000	16052000	0
BMP3	P12645	Bone morphogenetic protein 3	0	0	0	0	0	0	0	0	0	0	0	0	0	0	0	179784400	0	0	0	11141000	0	20824000	6253300	0	0	13709000	0	24471000	9345200	11999000	10999000	9605600	14106000	199865400	15118000	16525000	0	0	0	0	0	0	0	0	0	0	0
BMP5	P22003;P22003-2	Bone morphogenetic protein 5	0	0	0	0	0	0	0	0	0	0	0	0	0	0	0	0	0	0	0	0	0	0	0	0	0	0	0	0	0	0	0	0	0	0	0	0	25708584	14132658	3165033	33224577	37910	9827315	25217151	3875403	0	0	0
BMP6	P22004	Bone morphogenetic protein 6	0	0	0	0	0	0	0	0	0	0	0	0	0	0	0	0	0	0	0	0	0	0	0	0	0	0	0	0	0	0	0	0	0	0	0	0	125253481	86815491	72581811	156378814	44432489	84951589	114924376	58256238	32625900	0	0
BMP7	P18075	Bone morphogenetic protein 7	0	0	0	0	0	0	0	0	0	0	0	0	0	0	0	0	0	0	0	0	0	0	0	0	0	0	0	0	0	0	0	0	0	0	0	0	5835335	8309091	4026316	11088409	1759522	5392535	2659074	9489450	2368000	0	0
BOC	Q9BWV1;Q9BWV1-2;Q9BWV1-3	Brother of CDO	0	0	0	0	0	0	0	0	0	0	0	0	0	0	0	0	0	0	0	0	0	0	0	0	0	0	0	0	0	0	0	0	0	0	0	0	15179500	24824500	18536850	0	24015200	8246600	18951400	9293100	20074000	6753900	0
BOLA2B	Q9H3K6;Q9H3K6-2	BolA-like protein 2	0	0	0	0	0	0	0	0	0	0	0	0	0	0	0	0	0	0	0	0	0	7238300	0	0	35892400	0	0	4832400	54861600	46696400	1377100	8819400	12703900	63124300	0	6375000	0	0	5515400	16579300	25324400	26974700	2230800	9011600	58092000	156691000	0
BPGM	P07738	Bisphosphoglycerate mutase	0	0	0	0	0	36949500	0	0	210028000	0	226937000	0	108521300	31854200	0	74018000	0	0	0	0	0	0	0	0	74026000	0	0	34005500	0	236344000	1808600	8840600	0	17118000	0	0	0	0	0	0	0	30648700	0	0	449440000	2760690	0
BPI	P17213	Bactericidal permeability-increasing protein	0	0	0	0	0	0	0	0	0	0	0	0	0	0	0	0	0	0	0	0	0	0	0	0	0	0	0	0	0	0	0	0	0	0	0	0	0	0	0	0	0	99712000	0	0	12511000	0	0
BPNT1	O95861;O95861-2;O95861-3;O95861-4	3`(2`),5`-bisphosphate nucleotidase 1	0	0	0	0	0	0	0	0	0	0	0	0	0	0	0	0	0	0	0	0	0	0	0	0	0	0	0	0	0	0	0	0	0	0	0	0	0	0	0	0	1147510	0	0	0	3834100	238625000	0
BPNT2	Q9NX62	Golgi-resident adenosine 3`,5`-bisphosphate 3`-phosphatase	38204000	0	0	111173000	8890700	11378000	193221000	0	8842200	0	0	30520500	0	0	18497000	22564000	55568000	0	0	315230500	151616400	6915200	411193000	195961100	32261600	618972700	100334900	14434200	1535220	0	141023000	154673100	82026000	113502000	410408000	44339600	1259981000	604256000	277772400	1371991400	758487600	431473900	870889000	720535600	565973500	98224640	2601300
BROX	Q5VW32;Q5VW32-2	BRO1 domain-containing protein BROX	0	0	0	0	0	0	0	0	0	0	0	0	0	0	0	0	0	0	0	0	0	0	0	0	0	0	0	0	0	0	0	0	0	0	0	0	0	477750	2879300	0	8025800	0	0	4711800	25794800	4765520	0
BSG	P35613;P35613-2;P35613-3;P35613-4	Basigin	30259000	13102000	21214000	30313000	39318000	0	27666000	20748100	17599500	41287000	0	8876800	14597100	10920000	29386000	49911000	44656000	49667100	29766100	73938700	235382700	368649000	117138400	78614000	226638300	97599600	152992400	758468000	77180500	622822000	113750000	304864000	224958000	236274000	33284000	66115900	97692300	160878300	217102600	53945700	157635800	50305100	100682900	101588900	174606500	165503300	0
BTD	P43251;P43251-2;P43251-3;P43251-4	Biotinidase	393421000	251632500	551379000	925521000	321490000	407290000	1552157000	223649000	321073700	79383000	102340000	381462800	343198000	127885000	1149266000	335487000	1015766900	438961000	336855000	567733000	505615000	193941900	957121900	442129200	699933000	923746000	246734400	109390000	57612900	131867000	167324600	585886000	392977500	117722000	417315000	278001700	4303555000	6279682300	5986150000	4877181000	6089091000	3402320000	10911128000	4420066600	4946869000	2016991500	153771400
BUB3	O43684;O43684-2	Mitotic checkpoint protein BUB3	0	0	0	0	0	0	0	0	0	0	0	0	0	0	0	0	0	0	0	0	0	0	0	0	0	0	0	0	34089000	0	0	0	0	2504100	0	0	0	0	0	4312900	0	0	0	0	0	312180700	0
BZW1	Q7L1Q6;Q7L1Q6-2;Q7L1Q6-3;Q7L1Q6-4	eIF5-mimic protein 2	0	0	0	0	0	0	0	0	0	0	0	0	0	0	0	0	0	0	0	0	0	0	0	0	0	0	0	0	0	0	0	0	0	0	0	0	0	0	870160	0	0	0	0	0	5121060	39025500	0
C10orf105	Q8TEF2	Uncharacterized protein C10orf105	0	0	0	0	0	0	0	0	0	0	0	0	0	0	0	0	0	0	0	0	0	0	0	0	0	0	0	246812700	0	0	26517000	55143820	7053600	8669700	0	0	0	0	0	0	0	0	0	0	0	0	0
C16orf89	Q6UX73;Q6UX73-2	UPF0764 protein C16orf89	200711900	75102000	81050100	427361000	37392100	221338500	290466000	145130000	34969800	0	0	192031400	72274000	0	564765300	273397000	530870000	133494500	541771000	760479000	516832400	162483180	1455185000	520609500	921990000	965674700	636888300	156792800	26261300	16496400	230327200	751038500	443455500	249803700	596951100	648436600	4307769200	2770802600	1612274000	7175431000	1927643300	3615552900	5100998800	3416706900	1772354300	114389800	288237400
C1GALT1	Q9NS00;Q9NS00-2	Glycoprotein-N-acetylgalactosamine 3-beta-galactosyltransferase 1	0	0	0	0	0	0	0	0	0	0	0	0	0	0	0	0	0	0	0	0	0	0	0	0	0	0	0	0	0	0	0	0	0	0	0	0	17533300	11663700	3544100	2991400	13568900	3838000	29883300	3393000	7045200	0	0
C1GALT1C1	Q96EU7	C1GALT1-specific chaperone 1	0	0	0	0	0	0	0	0	0	0	0	0	0	0	0	0	0	0	0	0	0	0	0	0	0	0	0	0	0	0	0	0	0	0	0	0	28583900	10647800	14874500	18936100	29122200	7160500	49727800	18278100	16903900	547610	0
C1orf87	Q8N0U7	Uncharacterized protein C1orf87	0	0	0	0	0	0	0	0	0	0	0	0	0	0	0	0	0	0	0	0	0	0	0	0	0	0	0	7522700	0	0	0	0	0	0	0	0	0	0	0	0	0	0	0	0	0	0	0
C1QA	P02745	Complement C1q subcomponent subunit A	508281000	150618000	152046000	798256900	49946900	1316700000	463728000	282961500	431230000	224276000	79526000	681048000	1172679000	94361600	1341623000	604457000	692896000	403034000	323740000	947157900	817541900	190402000	1432885700	450688100	2505885000	900383000	641045000	103633000	175852100	91191300	631717000	643378500	826234500	405987700	415773330	620836400	12413142900	7405399700	4669840100	31698919000	2745695800	34341465600	13739777300	11002617200	10554397800	5778350300	170250200
C1QB	P02746	Complement C1q subcomponent subunit B	1021222000	542395000	562941000	1794640000	414227000	3898031600	1448042000	880128000	633832000	478677000	384370000	1983869000	1818352000	411467000	2399999000	1574284000	1222294000	716162000	688779000	483832000	469944000	149278700	825752000	408790000	2550631000	793710200	203418400	145917000	130152200	213709100	254833500	841152000	751085000	297098000	230602000	353045000	23006210000	18532301400	9607497200	55147087100	6537805200	85450145200	30460590000	22526918500	13836140000	10342337000	88984000
C1QBP	Q07021	Complement component 1 Q subcomponent-binding protein, mitochondrial	0	0	0	0	0	0	0	0	0	47614900	0	0	0	0	0	0	0	0	0	0	0	0	0	0	16210000	0	0	45436100	16816000	32558000	0	0	1944000	0	0	0	10720000	2524100	6276300	12459000	24378000	34329700	25384700	7072500	22004800	714261000	0
C1QC	P02747	Complement C1q subcomponent subunit C	947511000	713908000	668630000	2312470000	206556000	4390850000	1777330000	890045000	644349000	584203000	389354000	2319010000	1938522000	254033500	2608570000	2119350000	1162260000	327730000	662370000	773170000	789570000	147716000	1771580000	461155900	3656980000	828090000	288192000	190133000	257739000	274272000	147905000	1184790000	964550000	376839100	314449000	268881000	29281271400	22513521700	13229063600	63192080000	8559665300	92408463000	38942881260	27078564500	16474123600	11616104690	116918000
C1QL1	O75973	C1q-related factor	0	0	0	0	0	0	0	0	0	0	0	0	0	0	0	0	0	0	0	0	0	0	0	0	0	0	0	0	0	0	0	0	0	0	0	0	91348873	64224226	84029751	118362857	61204452	41473777	85230109	76910278	28151414	11375595	0
C1QL3	Q5VWW1;Q5VWW1-2;Q5VWW1-3	Complement C1q-like protein 3	0	0	0	0	0	0	0	0	0	0	0	0	0	0	0	0	0	0	0	0	0	0	0	0	0	0	0	0	0	0	0	0	0	0	0	0	19613327	16323074	11567349	33472143	23211548	7291223	7719891	10031622	6662386	9891015	0
C1QTNF1	Q9BXJ1;Q9BXJ1-2	Complement C1q tumor necrosis factor-related protein 1	0	0	0	0	0	0	0	0	0	0	0	0	0	0	0	0	0	0	0	0	0	0	0	0	0	0	0	0	0	0	0	0	0	0	0	0	591898800	557063000	193588300	446925100	349829800	558462000	683456000	311459000	218776400	32000600	0
C1QTNF3	Q9BXJ4;Q9BXJ4-2;Q9BXJ4-3	Complement C1q tumor necrosis factor-related protein 3	0	0	0	0	0	0	0	0	0	0	0	0	0	0	0	0	0	0	0	0	0	0	0	0	0	0	0	0	0	0	0	0	0	0	0	0	1247712000	550437000	151186000	525465000	431682600	255792000	698533000	270723600	186812400	22146000	0
C1QTNF4	Q9BXJ3	Complement C1q tumor necrosis factor-related protein 4	18702100	0	0	10546000	0	0	0	0	0	0	0	0	0	0	10792000	0	0	0	0	19227000	0	0	19439500	5997500	0	14380000	0	0	0	0	0	7057400	0	0	2702000	0	425477500	187312800	114152300	321200200	161134600	158738400	269110700	199378100	49364980	4667560	0
C1QTNF5	Q9BXJ0	Complement C1q tumor necrosis factor-related protein 5	0	0	0	0	0	0	0	0	0	0	0	0	0	0	0	0	0	0	0	0	0	0	0	0	0	0	0	0	0	0	0	0	0	0	0	0	87293000	124338800	92500600	8319690	111088800	28616800	91023000	87575500	157547500	106788200	0
C1R	P00736	Complement C1r subcomponent	2751861800	1400491800	1716782600	3587209000	2412272400	1679262500	3670153000	2371948100	1616436000	795409200	118708500	4587275000	1993774000	802123100	4506884000	5871301200	4175946400	1823489000	2413635400	4660443006	5593304700	5167606493	6533641000	3913138400	7412044900	4949127400	3564013936	624330421	1467052262	332895100	3644949506	6290383100	5532818900	3033561644	3974546374	2482939500	29155450388	17505893919	20367658001	90609661036	18594167000	57436553000	54972289600	25472622000	19786036000	12640260000	1701724596
C1RL	Q9NZP8	Complement C1r subcomponent-like protein	48263000	46702800	26759000	29203000	62067000	0	53072000	80309000	0	0	12871000	93314000	13452000	23422000	101664000	0	54331000	30102400	52301000	24139694	96713000	43911607	160750000	131425000	189790000	90387000	20451364	3228479	7628238	54321800	47411594	73097000	80608000	23015956	23415126	35566000	210159012	135897081	233744799	114553764	210357830	166644000	282843200	257852400	87285700	138661900	5331204
C1S	P09871	Complement C1s subcomponent	3329448700	2204587500	2308314800	4020102000	3165807300	3619971000	4719947000	3405072000	2250029200	1064953000	183848600	4616426600	2470619100	1142465900	4953926700	6490208000	3645727000	2029493900	2805613700	2874105300	3089314100	2315868000	4583457000	3030375600	5296190400	3081735000	1664712600	449539500	1051500800	154640000	1725184000	3308782000	2767847000	2117267000	1717867300	2018204000	42517976263	23030733000	27198775406	77290286000	28198333359	74832164000	58012104900	45133560765	25486860000	15511822000	1312460800
C2	P06681;P06681-2;P06681-3	Complement C2	459248000	275204300	766109100	1041035000	463565200	1546200000	1014398000	444542700	94938900	241493100	281054500	497283300	844203200	178338100	1192669100	1020916300	999740500	452402700	903172900	637532700	850012500	425771600	1673722500	1352747100	3002705000	1010234000	464827700	69133800	167410800	359701600	249360200	921562000	920988400	535130300	551807900	880039800	2001500600	4130195600	2915396000	1367773550	2943870000	3182661700	2648159200	1960412100	1557981930	5193184700	166485800
C20orf27	Q9GZN8;Q9GZN8-2	UPF0687 protein C20orf27	0	0	0	0	0	0	0	0	0	0	0	0	0	0	0	0	0	0	0	0	0	0	0	0	0	0	0	0	0	0	0	0	0	0	0	0	2193400	0	4922200	0	15948300	32500000	5486000	6500100	26457000	5117000	0
C2CD2L	O14523;O14523-2	Phospholipid transfer protein C2CD2L	0	0	0	0	0	0	0	0	0	0	0	0	0	0	0	0	0	0	0	0	0	0	0	0	0	0	0	11229000	0	30844000	0	0	0	0	0	0	0	0	0	0	0	0	0	0	0	0	0
C3	P01024	Complement C3	58875257200	47757832100	85582384400	84373359000	40792346900	114712534300	103587798600	72979077200	23587009800	15428454200	52562746500	85057228500	65431209500	26752456600	108852737400	72692744000	78482348800	47014293340	92132668300	45370953200	58536426470	41892222900	92823783840	114137553610	166762124100	80023980920	37859802790	10029315790	7880861920	44191698100	33182202200	66616584100	62002363580	44117060950	42156814010	81944314390	92772819700	137352071600	158035707880	91682718800	98151974300	185028625890	159828487800	99841564300	72755862950	122873592100	17152941650
C3AR1	Q16581	C3a anaphylatoxin chemotactic receptor	0	0	0	0	0	0	0	0	0	0	0	0	0	0	0	0	0	0	0	0	0	0	0	0	0	0	0	0	0	0	0	0	0	0	0	0	98059000	40779000	72215000	165490000	40177000	98200000	201700000	143314000	85723000	56660000	0
C4A	P0C0L4;P0C0L4-2	Complement C4-A	23804882228	21407668629	29430185169	38183138409	19823666346	52066146986	57243030102	22206017591	6757375688	3720679500	4703538517	33443530334	30902278383	9736054319	53950813480	43504249093	31704206307	19766307433	33745742592	29865879348	36552075104	23219445198	51502222863	62069761196	83727903657	81535358531	19506520714	3967935756	2957224174	10557455500	20649206136	46726941280	44797909761	30832916788	27366662715	55833939666	116133241774	140635406281	161761497469	139171087737	125642919266	198025947891	247733627996	112055692215	46300057437	28167768121	6604596687
C4B_2	P0C0L5	Complement C4-B	24158383172	20883522171	30315785431	37718130291	18948608954	55563885114	58081096098	21616840109	8214507112	4209838800	5395560183	32554032866	29529003217	9808652281	53930857320	46061810507	31842536693	19473532467	35743250408	29189119252	36702830896	22430359102	53557008037	59377005704	83352712243	74594203699	19835361586	4733064664	3380563816	10526914000	20179490764	47816602220	44505939239	30707201012	26566042995	54754458734	121274099846	143479864369	160637753471	145093674823	124660131704	199901786009	244837312304	118069638985	58568557763	35255144099	6534420073
C4BPA	P04003	C4b-binding protein alpha chain	21994200	0	187593800	260926600	20741000	10447000	687516600	1649283000	29860000	0	339933000	138532500	1266491000	177523900	206380600	50206000	38012000	23900300	152320600	16852000	288764000	57139100	386101800	1754841000	598656800	619146000	158268900	61979100	1886000	987173400	40630500	613602300	90866000	282486900	12073100	188295100	1423113000	2218723700	6499237790	4534474480	1294414500	5442854700	13067190000	11583620500	2312031100	485176300	0
C4BPB	P20851;P20851-2	C4b-binding protein beta chain	0	0	0	0	0	0	0	0	0	0	0	0	0	0	0	0	0	0	0	0	0	1397300	0	58228000	0	0	0	0	0	13508000	644000	0	0	0	0	0	42793700	86909400	300746100	212085000	58988800	243224000	647530000	606412000	99825500	11880180	0
C4orf48	Q5BLP8;Q5BLP8-2;Q5BLP8-3	Neuropeptide-like protein C4orf48	214239000	70105000	35793000	418405000	77254000	61628000	232159000	26266000	0	44413000	0	89500000	0	41826000	207709000	33884000	69977000	0	92384000	228800000	112959000	32528600	748280000	79024000	280969000	325949000	61958600	20102100	47853200	0	42502100	222358700	144148000	40160000	168666000	92608000	238301000	289171000	156121000	28220000	295803000	36072400	165701000	92401000	205855000	742998000	101103000
C5	P01031	Complement C5	226858500	220300000	970776500	653491200	108928400	1128690200	1120430000	1545014500	169603200	23318800	792877400	1061924100	1034976200	265769500	554233200	1080521700	1019871600	120716100	1427434400	302168200	834515000	634640700	746301500	2685669800	822826000	949455990	674045400	60607500	96325410	899178900	399929800	536273000	283701700	666432000	522212300	1482661400	2722622100	6805813800	12803916100	3849024400	6187259190	5893994100	14275454000	13087689000	5228441200	3614663560	79011510
C6	P13671	Complement component C6	124793600	189358300	493069000	109896600	213547100	211353000	291861000	449912700	23555900	36626700	30405000	226809600	287801300	150647100	248607300	198876400	184245000	116714800	480734800	89148900	175548200	223141700	192571800	1162820400	637432900	441242700	173025100	37681300	8312300	113632560	93276260	393763800	91765710	88647590	138404940	520683860	1444985900	5332010000	6044341200	678324900	3057468000	2225357700	2406399060	3936351700	3362823500	1150852700	33081100
C6orf120	Q7Z4R8	UPF0669 protein C6orf120	0	0	0	0	0	0	0	0	0	0	0	0	0	0	0	0	0	0	0	0	0	0	0	0	0	0	0	0	0	0	0	0	0	0	0	0	85279000	31478000	53644000	61746000	58246000	68303000	83426000	113535000	46109000	9846900	0
C7	P10643	Complement component C7	4142302500	2170116600	3458049600	7335929000	2861418600	2312322400	6306796000	4941814200	2607260600	1242148700	535721800	8424156000	1512428900	1606276900	3931848000	6887039000	4420720900	2986573700	5246992000	2354649600	2819244200	1225330100	6637244000	3287415400	7821595000	4259065400	1612871800	507508700	458553170	414898800	1521985700	5493085000	1266176000	1481852200	1722499400	3713003800	2846117600	2713303400	2514225900	2390014400	3848703000	3649039800	3653745500	3212436000	4937022500	10523456000	309340800
C8A	P07357	Complement component C8 alpha chain	87496600	268143900	401980500	379961000	98042600	261451000	284503900	436376300	55636600	36787500	178981700	290377100	313095200	80549000	315450800	225275700	319386100	90358300	611588800	91461000	171218000	151688700	292326900	574955000	345369000	238991000	119960100	15293500	19408300	149922000	117740130	218658600	117354130	90243900	103363910	466732000	779023000	2722001700	2837175700	1715649200	1117858300	2200822100	1107802900	1825432700	1009518790	603427000	265950
C8B	P07358	Complement component C8 beta chain	135958400	300094300	482732800	247701800	205688000	180954000	219235100	228979400	2210000	3932800	117631500	339962300	125263400	86050300	299592000	131113900	303896900	91132500	647420700	153000400	430328300	305869600	637100700	1085367600	256666000	433824700	202940800	18987600	10864300	158529700	227331700	263327400	224151800	90873100	247547200	654297300	5291587880	13357732050	12188030854	13943090080	4704391700	13671296410	10605098450	12030373300	4298385000	1035561800	14602200
C8G	P07360	Complement component C8 gamma chain	88499600	146365000	352000000	261303000	37292000	216608000	287791000	302770000	72192900	24913200	106382000	273089000	188680000	77123000	202052000	158970000	145786000	70518000	306216000	72156200	169812800	91003000	266496000	345550500	358250000	186165000	82334900	8838500	5190200	101469600	77454000	136110900	94164000	81181000	76995500	332526000	360056000	1494496000	1159456000	743309000	491010300	1102990000	678174600	807768200	517995000	403608000	0
C9	P02748	Complement component C9	764760100	1629361600	2201666900	2110098800	792861200	1613215000	2805877000	2523745800	502411700	154167200	351210100	1938231800	1096513000	816193100	2299502800	1045874000	3046293900	601629200	3006061000	854151800	2425399000	1221787500	3042949000	4238979000	4527494000	2973436900	1449721000	488920500	119612500	877745000	1001520100	2424736000	942093800	368097800	1308046100	2721342100	5200975300	11138414600	14236201000	6295466500	7606324800	9718531000	14205681100	12714002000	9186353500	2801694200	209133500
C9orf64	Q5T6V5	Queuosine salvage protein	0	0	0	0	0	0	0	0	0	0	0	0	0	0	0	0	0	0	0	0	0	0	0	0	0	0	0	0	0	0	0	0	0	0	0	0	1582800	0	0	8285500	2809800	5033400	0	532390	6207100	21041500	0
CA1	P00915	Carbonic anhydrase 1	0	0	0	1787923000	0	9319154000	62065000	353094000	14961971500	171458900	15175358700	193178400	12229368000	5284621000	61180200	11516670000	0	0	0	4332000	112607000	0	1685538000	30622800	7084344000	52357000	53445400	4427696100	52781900	17305468000	207617900	1883274000	71432300	1776290000	231200	9649900	0	0	0	80333400	0	305467500	0	20807980	2492981600	114404100	15363000
CA10	Q9NS85;Q9NS85-2	Carbonic anhydrase-related protein 10	0	0	0	0	0	0	0	0	0	0	0	0	0	0	0	0	0	0	0	0	0	0	0	0	0	0	0	0	0	0	0	0	0	0	0	0	302982000	152231000	57782080	101951000	255127300	107298100	306184000	114288600	87629300	0	0
CA11	O75493	Carbonic anhydrase-related protein 11	8837600	0	0	0	0	13370000	12564000	0	0	0	0	0	0	0	0	0	33100000	13880800	0	0	0	0	0	0	0	0	0	0	0	0	0	0	0	0	0	0	55449000	59054000	16609500	20792200	28255000	34438000	40804000	6235200	19093200	3223300	0
CA14	Q9ULX7	Carbonic anhydrase 14	0	0	0	0	0	0	0	0	0	0	0	0	0	0	0	0	0	0	0	5817100	9180500	49969500	4653800	2125100	58055000	0	5849300	36283000	6246500	17480100	6214800	12529000	18051200	7024700	3145000	0	2452100	8254600	40668200	0	12523000	0	5053700	11991700	14452600	0	0
CA2	P00918	Carbonic anhydrase 2	0	0	7121000	162979200	0	959981000	0	18211600	1980364800	30049300	2612172000	48010800	2850635500	1037933000	0	1863017000	0	7378500	0	173884000	2128481000	2685375000	980871000	1176257000	1873644000	235902000	799056600	5291604000	221483600	5665338000	520072900	2348123700	1122105500	1530179000	51843500	358751500	10938600	130928400	224985700	0	73570100	32677870	4688900	30441100	547154000	41281400	10865700
CA3	P07451	Carbonic anhydrase 3	0	0	0	0	0	4559100	0	0	6125200	0	28049300	0	0	0	0	0	0	0	0	0	0	0	0	0	0	0	0	0	0	0	0	0	0	0	0	0	0	0	0	0	0	0	0	0	0	0	0
CA4	P22748	Carbonic anhydrase 4	15906400	0	0	6742000	0	0	17220000	0	6618900	0	0	0	0	0	23855200	0	30045600	10157000	10373000	0	0	0	0	0	0	0	0	0	0	0	0	0	0	0	0	0	0	0	0	0	0	0	0	0	0	0	0
CAB39	Q9Y376	Calcium-binding protein 39	0	0	0	0	0	0	0	0	0	0	0	0	0	0	0	0	0	0	0	0	1150700	2751000	0	0	0	0	1428100	12193000	691590	5596800	1585500	0	2391100	1496500	0	0	2971880	281840	3282230	1858100	8416800	0	3779300	737130	1267700	11243600	0
CACHD1	Q5VU97;Q5VU97-2	VWFA and cache domain-containing protein 1	6095400	0	0	5640400	0	13987200	21251000	0	1657100	0	0	0	0	0	2531800	0	80164400	0	0	9326100	14702400	1625350	0	5826500	6360900	7418000	2352500	0	311930	0	2481300	1605100	4552400	383720	15933900	1140400	35786300	50401600	11267200	0	42011200	9064900	30801000	5713300	14156200	9698320	0
CACNA2D1	P54289;P54289-2;P54289-3;P54289-4;P54289-5	Voltage-dependent calcium channel subunit alpha-2/delta-1	1242915193	230961000	258619041	2116382942	281090200	502012915	1482363194	205182903	210625600	128180000	3937400	553480719	66510400	192007400	1234419524	620412490	1490103190	277171600	340679200	786651000	291184500	128652100	2755510800	407965600	738207000	1160240100	123558900	55945300	96595100	87229500	82820700	525279000	369309000	109151700	671416700	135627900	398332849	568323101	264269752	46397420	503412221	55726700	279155901	73183500	232806800	2969875631	170607800
CACNA2D2	Q9NY47;Q9NY47-2;Q9NY47-3;Q9NY47-4;Q9NY47-5	Voltage-dependent calcium channel subunit alpha-2/delta-2	19791607	6591500	473059	565258	25389500	1221085	20431806	1085497	0	0	0	248281	0	0	13630076	941410	36607510	6590300	0	0	0	0	0	0	0	0	0	0	0	0	0	0	0	0	0	0	112730351	86053499	49414518	19008700	156815579	19146800	92707599	59330600	39376700	20260369	0
CACNA2D3	Q8IZS8;Q8IZS8-2;Q8IZS8-3	Voltage-dependent calcium channel subunit alpha-2/delta-3	0	0	0	28430700	0	0	0	0	0	0	0	0	0	0	0	3070400	9068200	0	0	9158530	0	302720	0	0	0	14190000	508630	0	0	0	535760	0	555630	0	60845	0	420212800	422483400	299423200	19444170	500309500	28970690	345251910	195835300	331503400	211166400	0
CACYBP	Q9HB71;Q9HB71-2;Q9HB71-3	Calcyclin-binding protein	0	0	0	0	0	0	0	0	0	0	0	0	0	0	0	0	0	0	0	0	0	0	0	0	0	0	0	0	0	0	0	0	0	0	0	0	1924200	1194800	1961840	23890200	13436300	39126560	11321000	943020	43086700	148495700	0
CAD	P27708	CAD protein	0	0	0	0	0	0	0	0	0	0	0	0	0	0	0	0	0	0	0	0	0	0	0	0	0	0	4449600	0	56256400	4072600	0	0	0	0	0	0	0	0	0	0	0	0	0	0	3612600	432807757	0
CADM1	Q9BY67;Q9BY67-2;Q9BY67-3;Q9BY67-4;Q9BY67-5	Cell adhesion molecule 1	858403000	252385800	182370900	729898000	350163000	246130000	860427000	397058000	382955000	174512000	0	405319000	133354000	98940000	621914000	560222000	1237508000	356617000	310171000	520417000	241057000	72799700	679333000	242848000	645989000	336629000	83941200	277856100	40869000	38604000	108816600	771337000	122904000	64243100	348072700	137885000	3430205600	2426428000	1819163900	1388894000	4850465300	1424178000	2593436000	1620024000	2152967500	1716382000	246322300
CADM2	Q8N3J6;Q8N3J6-2;Q8N3J6-3;Q8N3J6-4;Q8N3J6-5	Cell adhesion molecule 2	209615000	18564700	15212000	135643000	19996300	29056900	190885000	0	11040600	51164000	0	0	3863000	76181100	176181000	35121000	148046000	103702000	13199000	186287900	64755000	10090100	418523000	62410600	284414000	234021000	24265400	192215000	66381500	217438000	34847000	320254000	88490600	41758900	94902000	45680800	217104300	164960900	77716300	78205000	162387000	42060800	157805590	32937300	66223700	203892800	32588700
CADM3	Q8N126;Q8N126-2;Q8N126-3	Cell adhesion molecule 3	1030417200	378339400	328766000	1052906500	474867100	372786700	1025251000	328612500	339407000	213813900	3895400	523793000	147271800	180388300	741256000	537644000	1118505000	483295000	589304000	1207017000	545730000	303811800	1648290900	690034000	1460656970	943328400	328833500	369467000	209425500	440281180	271600200	1259386200	451844500	294465630	858855400	689668400	1455783000	716147600	539993400	637573800	1198409500	680698800	864961200	529041000	701098900	591875000	197480600
CADM4	Q8NFZ8	Cell adhesion molecule 4	786565700	361292000	460705000	890440000	562282000	169241000	954803000	218503000	243582000	161441500	34532000	429721000	168706000	266868100	480448000	513716000	673882000	567904000	379143000	712603000	411331000	164082000	1676712000	579792000	998329000	920173000	399268700	661592000	82540300	873580000	228995000	847436000	504041000	241138000	476208000	453639000	274126000	84278100	121392600	66957400	145029000	43622100	217152000	125191400	58432400	149822200	196219900
CADPS	Q9ULU8;Q9ULU8-2;Q9ULU8-3;Q9ULU8-4	Calcium-dependent secretion activator 1	0	0	0	0	0	0	0	0	0	0	0	0	0	0	0	0	0	0	0	0	0	0	0	0	0	0	0	6270400	4100000	14797200	0	0	0	0	0	0	0	0	0	0	0	0	0	0	0	0	0
CALB1	P05937;P05937-2	Calbindin	0	0	17982600	34613700	0	26752400	25498100	0	0	0	0	38755800	0	0	0	23532500	32481000	0	13867000	32832000	21556000	7512000	89230000	54500000	62956000	36334000	7712100	18496200	3134000	3420200	26697800	45939000	6136700	10507000	14465000	16792000	81876300	80890100	103824300	30380600	256730800	18645100	61242300	70729900	104575900	180881000	21241180
CALCA	P01258;P01258-2;P06881	Calcitonin; Calcitonin gene-related peptide 1	0	0	0	0	0	0	0	0	0	0	0	0	0	0	0	0	0	0	0	0	0	0	0	0	0	0	0	0	0	0	0	0	0	0	0	0	4698300	25852000	2479100	2280200	2204800	0	346700	7661600	4900600	0	0
CALM1;CALM2;CALM3	P0DP23;P0DP24;P0DP25	Calmodulin-1; Calmodulin-2; Calmodulin-3	14501000	0	27639000	36288000	0	222431000	172894600	75711000	43588000	1016690000	78540800	16369300	44345700	302020000	68534000	98443000	40633000	14351000	31812000	7995300	161533000	221053600	37818000	90968400	336626000	46929200	49599500	1920292000	235216000	183958000	2590800	237601200	86438000	139591000	0	5094800	144794382	118457520	160545382	207127746	330009468	475635522	307138853	121047299	273747797	2569824908	72478000
CALML3	P27482	Calmodulin-like protein 3	0	0	0	0	0	0	0	0	0	0	0	0	0	0	0	0	0	0	0	0	0	0	0	0	0	0	0	0	0	0	0	0	0	0	0	0	16614618	5533480	18828618	5894254	12410532	29704478	26591347	10131501	23166203	135725092	0
CALML5	Q9NZT1	Calmodulin-like protein 5	0	0	0	0	0	0	0	0	0	181199500	0	0	0	0	0	0	0	0	0	6685600	40536000	2421600	0	3892500	0	0	26764800	22722000	4515000	7554900	4200600	0	15537000	3642100	6931800	6439500	0	0	0	0	0	0	0	0	0	0	10406700
CALR	P27797	Calreticulin	417532200	101045400	270235200	780612700	49483000	199222000	704630500	225575000	81162100	168483000	0	375092900	36374600	35265100	531090000	306625800	428306200	211317300	346585700	385821000	154771000	53949800	867830000	218422600	677814400	523720000	71977000	584972000	150849600	402505000	81747000	543929800	187958100	131233000	194210400	171235700	5750842000	2950211000	3155772000	5218112000	3979056000	4101262200	5324738900	4174257000	2944001100	6088037000	113964770
CALU	O43852;O43852-10;O43852-11;O43852-12;O43852-13;O43852-14;O43852-15;O43852-2;O43852-3;O43852-4;O43852-5;O43852-6;O43852-7;O43852-8;O43852-9	Calumenin	0	0	0	0	0	0	0	0	0	0	0	0	0	0	0	0	0	0	0	0	0	0	0	0	0	0	0	0	0	0	0	0	0	0	0	0	7634800	5041300	18528500	18116700	16304700	8015800	0	4801100	21425400	67882000	0
CALY	Q9NYX4	Neuron-specific vesicular protein calcyon	72911200	0	0	22525000	32433000	20046000	49586000	13021000	0	23945000	0	0	0	21226000	42823000	31776000	41192000	20836000	14299000	0	0	0	0	0	0	0	0	0	0	0	0	0	0	0	0	0	0	0	0	0	0	0	0	0	0	0	0
CAMK2A	Q9UQM7;Q9UQM7-2	Calcium/calmodulin-dependent protein kinase type II subunit alpha	73518142	0	0	27240000	0	27752500	31781760	0	12310000	4284000	0	0	0	2363500	92110389	6556000	49256000	0	0	228018900	91531632	15760300	324399000	75266100	254968728	235936200	31832200	1681340637	268814162	1449516211	50083519	519093198	57982468	52235555	112492100	27163475	1143559000	754400000	197093300	2321575000	445926300	559099829	2038040000	354415400	417916104	493464695	38308300
CAMK2B	Q13554;Q13554-2;Q13554-3;Q13554-4;Q13554-5;Q13554-6;Q13554-7;Q13554-8	Calcium/calmodulin-dependent protein kinase type II subunit beta	26580558	0	0	0	0	8696000	20087240	7631500	0	0	0	12853000	0	2363500	13733311	0	54464000	7764800	6444500	38144428	21812124	11057161	36738042	28943266	162814328	31889000	15868616	367097114	72565689	325993687	37718038	139445259	20857086	13106415	15142500	14955987	781781318	290478362	181707818	501270166	439456754	528352454	643327059	369844633	258983745	129090288	0
CAMK2D	Q13557;Q13557-10;Q13557-11;Q13557-12;Q13557-3;Q13557-4;Q13557-5;Q13557-6;Q13557-8;Q13557-9	Calcium/calmodulin-dependent protein kinase type II subunit delta	0	0	0	0	0	0	0	0	0	0	0	0	0	0	0	0	0	0	0	0	964588	0	0	0	25869760	0	0	151520660	29484939	145738366	883139	47828360	1810299	5276006	0	63151	286380000	122025000	59560900	200945000	267384000	201947426	238310000	228087000	115687369	176803614	0
CAMK2G	Q13555;Q13555-10;Q13555-11;Q13555-2;Q13555-3;Q13555-4;Q13555-5;Q13555-6;Q13555-7;Q13555-8;Q13555-9	Calcium/calmodulin-dependent protein kinase type II subunit gamma	0	0	0	0	0	0	0	0	0	0	0	0	0	0	0	0	0	0	0	56989272	24746456	2222439	68532958	16699534	121319085	31889000	8507184	249713689	43111012	225150236	12994855	65823282	13266147	9063224	15142500	14955987	249898682	116669138	63999682	116337034	111554216	101019390	193784641	121851767	62608883	22816504	0
CAMKV	Q8NCB2;Q8NCB2-2;Q8NCB2-3	CaM kinase-like vesicle-associated protein	0	0	0	0	0	0	0	0	0	0	0	0	0	0	0	0	0	0	0	0	0	0	0	0	5109500	0	0	1622200	5624400	13385900	0	0	0	0	0	0	0	0	0	0	0	0	0	0	0	0	0
CAMP	P49913	Cathelicidin antimicrobial peptide	0	0	0	0	0	0	0	0	0	0	0	0	0	0	0	0	0	0	0	0	0	0	0	0	13369000	0	0	61322000	0	8635700	0	0	0	2120200	0	0	0	0	0	6789000	0	47575000	4418900	0	13638200	5478690	0
CAND1	Q86VP6;Q86VP6-2;Q86VP6-3	Cullin-associated NEDD8-dissociated protein 1	0	0	0	0	0	0	0	0	0	0	0	0	0	0	0	0	0	0	0	3857100	22191300	29211200	9176600	12937000	78280530	0	15850500	409163000	239625200	732288300	57952100	130895800	83147500	163157100	0	3389200	106759680	19079900	83110430	370522440	137200060	787343800	232999500	103384500	1067343200	1069450070	0
CANT1	Q8WVQ1;Q8WVQ1-2;Q8WVQ1-3	Soluble calcium-activated nucleotidase 1	147341000	18382000	5793900	64640000	5678100	80754600	177421100	16781800	10045000	9959500	0	50982200	28018800	3589900	87738000	27789000	162752500	54077800	44670900	150264000	56931000	21694300	162747000	39838800	92707400	160425000	30951900	5285000	10811900	0	22374900	75676200	51164600	17530200	114510000	48228900	502548100	437860500	296768500	520495000	482418600	232975200	402325800	257516800	274723110	480547000	16079900
CANX	P27824;P27824-2;P27824-3	Calnexin	0	0	0	0	0	0	0	0	0	0	0	0	0	0	0	0	0	0	0	4509300	43106400	6522600	45470000	0	135125000	0	1580200	1037837000	21158700	303615100	14077700	174637740	78810700	39811300	3546100	0	905496100	471702700	311534220	436301100	452577500	455035300	697301800	674142200	320540800	336840390	0
CAP1	Q01518;Q01518-2	Adenylyl cyclase-associated protein 1	0	0	0	0	0	0	0	0	0	0	0	0	0	0	0	0	0	0	0	0	51060500	29094700	0	0	36339000	5224200	0	289933200	69391900	249075600	7381300	91670800	35854400	23965700	0	0	27565975	33867037	152232144	92446481	110912010	686402225	76922958	14546420	987203894	421261401	0
CAP2	P40123;P40123-2;P40123-3	Adenylyl cyclase-associated protein 2	0	0	0	0	0	0	0	0	0	0	0	0	0	0	0	0	0	0	0	0	0	0	0	0	0	0	0	173071000	23197900	148069100	0	36616800	0	0	0	0	15526645	4099713	5729956	2515389	6246020	10205575	15867962	0	14488006	1502999	0
CAPG	P40121;P40121-2	Macrophage-capping protein	0	3100100	18033300	0	296523500	11305000	0	0	6444300	0	0	0	0	23848500	8803400	0	6158400	13453000	8119600	0	23910700	232306300	33213000	57288100	0	4868400	17165730	44220700	0	13419900	13243070	90189900	70006500	26469500	0	17907300	38941300	33405300	198689400	32294820	2030325000	35305770	74331700	109242300	131334800	19993630	2589800
CAPN1	P07384	Calpain-1 catalytic subunit	0	0	0	0	0	0	0	0	0	0	0	0	0	0	0	0	0	0	0	0	7134700	0	0	0	75648000	0	33333200	97741900	18682100	144626000	1476800	21038000	0	0	0	0	0	0	2329350	12646400	3866280	324901100	13675540	2237660	629040000	301639600	0
CAPN2	P17655;P17655-2	Calpain-2 catalytic subunit	0	0	0	0	0	0	0	0	0	0	0	0	0	0	0	0	0	0	0	0	0	0	0	0	0	0	0	36678700	0	0	0	0	0	0	0	0	95515700	111529420	116229000	94104800	117918900	104450400	111627600	103639390	104574210	13246000	0
CAPNS1	P04632	Calpain small subunit 1	0	0	0	0	0	0	0	0	0	0	0	0	0	0	0	0	0	0	0	0	8736800	0	0	0	22934000	0	0	21248000	12571700	110060000	2826700	19853500	2677300	0	0	0	49171200	2056800	21956400	38417960	84495180	187553500	39910230	70722700	325125000	44650300	0
CAPRIN1	Q14444;Q14444-2	Caprin-1	0	0	0	0	0	0	0	0	0	0	0	0	0	0	0	0	0	0	0	0	0	0	0	0	0	0	0	0	0	0	0	0	0	0	0	0	0	0	0	0	0	6751600	0	0	0	109391900	0
CAPS	Q13938;Q13938-3;Q13938-4	Calcyphosin	0	0	0	0	0	0	0	0	33843000	2131500	0	0	0	1261410000	0	0	0	0	0	6035800	54957300	55431300	0	21143100	209421000	6452700	51519900	4277828900	29140200	62708000	905757800	2019252700	679962000	1032919000	15260100	5510400	0	6687900	11597010	8811400	7910620	276144000	0	10425800	425081000	110464600	0
CAPZA1	P52907	F-actin-capping protein subunit alpha-1	0	0	0	0	0	0	0	0	0	23222900	5058800	0	0	0	0	0	0	0	0	5333000	39299062	50414221	13116000	4447150	97717484	6558737	5323251	220929274	104886900	264451949	4901000	97312216	23628939	28995700	0	2393450	106587294	30676346	195374602	217469967	262453047	458982828	243926464	31548102	452182336	1078416297	0
CAPZA2	P47755;P47755-2	F-actin-capping protein subunit alpha-2	0	0	0	0	0	0	0	0	0	0	0	0	0	0	0	0	0	0	0	5333000	21934338	12410079	13116000	4447150	53636516	2673063	10408449	140148326	0	110906051	0	60165784	19890061	6677700	0	2393450	42993906	18892054	51871858	81180633	114799253	368810572	156651936	40626698	201032264	143148603	0
CAPZB	P47756;P47756-2	F-actin-capping protein subunit beta	0	0	0	0	0	0	0	0	0	0	6659000	0	0	0	0	0	0	0	0	0	22889400	55400000	0	10099100	62662500	20190600	7119700	154350800	110064800	118821300	29928300	49455200	31395700	34773100	0	0	76290500	26006440	183168620	144519500	274703670	431326600	175324070	57068300	482209000	765061000	0
CARHSP1	Q9Y2V2	Calcium-regulated heat-stable protein 1	0	0	0	0	0	0	0	0	0	10683000	0	0	13135000	0	0	0	0	0	0	0	0	4307800	0	0	0	0	0	13931000	13366500	58880000	5204000	12166000	7091800	14368000	0	0	0	0	0	11658500	0	81706000	0	0	219239000	100374000	0
CARM1	Q86X55;Q86X55-1;Q86X55-2	Histone-arginine methyltransferase CARM1	0	0	0	0	0	0	0	0	0	0	0	0	0	0	0	0	0	0	0	0	0	0	0	0	0	0	0	0	0	0	0	0	0	0	0	0	0	0	0	1490600	0	53390000	0	0	132584000	21258800	0
CARNS1	A5YM72;A5YM72-2;A5YM72-3;A5YM72-4;A5YM72-5	Carnosine synthase 1	0	0	0	0	0	0	0	0	0	0	0	0	0	0	0	0	0	0	0	0	18512000	0	0	0	0	0	0	229449923	0	326631820	0	73163555	0	0	0	0	0	0	0	0	0	0	0	0	0	0	0
CARS1	P49589;P49589-2;P49589-3	Cysteine--tRNA ligase, cytoplasmic	0	0	0	0	0	0	0	0	0	0	0	0	0	0	0	0	0	0	0	0	0	0	0	0	0	0	0	0	0	0	0	0	0	0	0	0	579760	0	743570	13463990	6012240	67220400	8998030	987920	43977100	169246000	0
CARTPT	Q16568	Cocaine- and amphetamine-regulated transcript protein	248371000	92558800	49353300	47161000	83874000	16536000	111219000	54840000	43975000	126046000	0	68760600	22940000	121373300	197232000	270358000	116906000	119142000	48301000	193092000	95775500	6293200	82524700	9915600	258269000	202259000	41167500	32643000	4092200	0	15328000	261594000	36296000	49893100	53942700	72103000	196734000	88101000	71408000	86067000	94123200	52853000	101350000	135281000	64216000	32461000	5010300
CASP14	P31944	Caspase-14	0	0	0	0	0	0	0	0	0	0	0	0	0	0	0	0	0	0	0	8020600	27101900	5755000	0	0	0	0	451915900	15886400	2071800	0	28050430	41922900	35152300	22096500	1714900	1994700	0	0	0	0	0	0	0	0	0	0	39132700
CASQ2	O14958;O14958-2	Calsequestrin-2	0	0	0	0	0	0	0	0	0	0	0	0	0	0	0	0	0	0	0	0	0	0	0	0	0	0	0	0	0	0	0	0	0	0	0	0	5138780	14478620	14179000	13855510	4349910	4975500	6015400	28762900	2530410	1283500	0
CAST	P20810;P20810-10;P20810-2;P20810-3;P20810-4;P20810-5;P20810-6;P20810-7;P20810-8;P20810-9	Calpastatin	0	0	0	0	0	0	0	0	5441500	20613500	10981000	0	0	5519700	0	0	0	0	0	0	0	0	0	0	0	0	0	0	0	0	0	0	0	0	0	0	0	6355700	5838360	29015000	12081600	219457900	15498300	9851500	513914100	533348800	0
CAT	P04040	Catalase	0	0	0	59079000	0	618528000	0	0	2477560000	97286400	1969958500	42761900	2141937200	502386400	0	652911300	0	0	0	9776700	28581100	8734700	190420500	6795000	1158936700	0	452201700	798024600	48015400	2235640000	109274800	198717000	62619700	189169900	733190	12509000	0	0	0	0	0	4786300	0	0	113160700	33510400	42422000
CBLN1	P23435	Cerebellin-1	70779000	7057700	0	12698300	63984600	138277000	34634000	17565800	23096300	0	0	15019700	4060400	3201700	20202400	0	36816800	13392500	14411400	0	0	0	0	0	0	0	0	0	0	0	0	0	0	0	0	0	424601000	219851000	125692600	76592300	389796000	303878000	350594000	304825000	182602000	5750740	0
CBLN2	Q8IUK8	Cerebellin-2	0	0	0	0	0	0	0	0	0	0	0	0	0	0	0	0	0	0	0	0	0	0	0	0	0	0	0	0	0	0	0	0	0	0	0	0	71202100	37982100	9562400	44012200	26633500	25737000	48049900	14329000	8807800	6199900	0
CBLN3	Q6UW01	Cerebellin-3	86686000	20777700	0	0	94716000	19505600	51840900	28704800	12381800	0	0	23935000	0	0	31205000	0	108578600	4168500	11028000	186578000	43179500	15214000	10237000	31964700	97762000	106784000	34314600	0	0	0	22242300	3347500	23737200	0	78599000	21872300	706654300	277206210	167868000	136414500	434267500	366744300	593945400	373951200	228436000	639060	36049900
CBLN4	Q9NTU7	Cerebellin-4	49685300	22501500	8863500	0	18891000	16944000	104384000	9692600	0	7759900	0	0	0	6542600	74196900	0	75488300	13786500	13237000	0	0	0	0	0	0	0	0	0	0	0	0	0	0	0	0	0	111915300	54777700	15368500	74347900	45114400	22237200	71035400	14494300	5982900	29819600	0
CBR1	P16152;P16152-2	Carbonyl reductase [NADPH] 1	5982600	0	0	54438000	21460800	69460179	5881700	0	17036018	0	65576300	0	0	334435674	4346900	16356000	0	37367900	0	97751993	416565287	687208116	164414646	441624726	314239034	147872832	204184285	2865704882	148663879	3409673678	197673348	1949593889	583649639	384172521	58272552	251483367	128679211	176186018	195109114	326428557	162060106	256135811	202796910	92083262	203133550	114621118	14101492
CBR3	O75828	Carbonyl reductase [NADPH] 3	0	0	0	0	2901000	17347221	0	0	4153882	0	9018600	0	0	34381326	0	0	0	2727100	0	1549007	54498513	79532484	5002354	44385274	28112066	10316968	20691415	345464118	26265621	448384322	20491952	180422111	84866361	68681379	7086848	14946233	4667849	12361382	24563486	19559243	17868894	17937289	9774890	357928	11476950	10533272	1764508
CBX1	P83916	Chromobox protein homolog 1	0	0	0	0	0	0	0	0	0	0	0	0	0	0	0	0	0	0	0	0	0	0	0	0	0	0	0	0	0	0	0	0	0	0	0	0	0	0	3397300	8942200	4479900	11758500	2660900	0	1411300	73083903	0
CBX3	Q13185	Chromobox protein homolog 3	0	0	0	0	0	0	0	0	0	50020100	0	0	0	0	0	0	0	0	0	0	0	0	0	0	0	0	0	0	54968600	6214400	0	0	0	19157000	0	0	0	0	1164600	3578100	5906100	17750100	1415200	0	9906200	290171015	0
CBX5	P45973	Chromobox protein homolog 5	0	0	0	0	0	0	0	0	0	0	0	0	0	0	0	0	0	0	0	0	0	0	0	0	0	0	0	0	0	0	0	0	0	0	0	0	0	0	1283000	0	0	2610200	0	0	3954800	241660882	0
CCAR2	Q8N163;Q8N163-2	Cell cycle and apoptosis regulator protein 2	0	0	0	0	0	0	0	0	0	0	0	0	0	0	0	0	0	0	0	0	0	0	0	0	0	0	0	0	0	0	0	0	0	0	0	0	0	0	275470	0	0	0	0	0	2101400	71364660	0
CCDC124	Q96CT7	Coiled-coil domain-containing protein 124	0	0	0	0	0	0	0	0	0	0	0	0	0	0	0	0	0	0	0	0	0	0	0	0	0	0	0	0	0	0	0	0	0	0	0	0	0	0	0	0	264150	1202700	0	0	3440100	67384000	0
CCDC126	Q96EE4	Coiled-coil domain-containing protein 126	0	0	0	0	0	0	0	0	0	0	0	0	0	0	0	0	0	0	0	0	0	0	0	0	0	0	0	0	0	0	0	0	0	0	0	0	143283541	5412970	3180567	90869968	3924052	3611321	5922598	5506352	17308513	30492	0
CCDC168	Q8NDH2	Leucine-rich repeat transmembrane protein CCDC168	0	0	0	0	0	0	0	0	0	0	0	0	0	0	0	0	0	0	0	0	0	0	0	0	0	0	0	0	0	0	0	0	0	0	0	0	81698000	114153070	140564000	7069700	109787000	71604700	164692000	117800000	155223000	21881000	0
CCDC180	Q9P1Z9;Q9P1Z9-3	Coiled-coil domain-containing protein 180	0	0	0	0	0	0	0	0	0	0	0	0	0	0	0	0	0	0	0	0	0	0	0	0	0	0	0	0	0	0	0	0	0	0	0	0	55484900	72570500	59646950	42556000	37922300	40213900	47277500	36315500	37006700	48754000	0
CCDC25	Q86WR0;Q86WR0-2	Coiled-coil domain-containing protein 25	0	0	0	0	0	0	0	0	0	0	0	0	0	0	0	0	0	0	0	0	0	0	0	0	0	0	0	0	0	0	0	0	0	0	0	0	14778000	7671100	1591800	21066000	5649700	9603500	10337000	11281000	4642500	11255380	0
CCDC6	Q16204	Coiled-coil domain-containing protein 6	0	0	0	0	0	0	0	0	0	0	0	0	0	0	0	0	0	0	0	0	0	0	0	0	0	0	0	0	0	0	0	0	0	0	0	0	0	0	0	0	0	0	0	0	0	9625500	0
CCDC80	Q76M96;Q76M96-2	Coiled-coil domain-containing protein 80	0	0	0	0	0	0	0	0	0	0	0	0	0	0	0	0	0	0	0	0	0	0	0	0	0	0	0	0	0	0	0	0	0	0	0	0	95115660	61480440	105971300	81905000	3203670	65513800	184236400	188906500	247527300	124460000	0
CCER2	I3L3R5	Coiled-coil domain-containing glutamate-rich protein 2	0	0	0	0	0	0	3203620	0	0	0	0	0	0	0	0	0	2786500	0	0	0	0	0	0	0	0	0	0	0	0	0	0	0	0	0	0	0	63720900	12876800	5285300	176559000	14677600	25874500	71111300	21134100	3629800	0	0
CCK	P06307	Cholecystokinin	61304000	23304000	8767200	63723000	13424300	24875400	45721000	5501200	7946200	4001200	0	5929800	2020000	9970000	31757400	9005000	48575000	17214500	15294100	194509000	80172000	18558600	626200000	67238000	214297000	196586000	32231000	6220300	0	3821700	7157600	266691000	56307000	23190000	140899000	66423000	37966400	7959000	2445200	51216000	3140400	5625400	39394000	4063000	0	0	0
CCL14	Q16627;Q16627-2	C-C motif chemokine 14	44961000	25694000	27285000	56215000	70992000	0	12207000	15845000	6121600	0	0	35739000	0	17743000	15577000	103770600	0	10470000	74037000	0	0	0	0	0	0	0	0	0	0	0	0	0	0	0	0	0	65978000	47408200	70016000	98241000	71471800	31867000	79449900	74987000	28528600	47777800	0
CCL16	O15467	C-C motif chemokine 16	0	0	0	0	0	0	0	0	0	0	0	0	0	0	0	0	0	0	0	0	0	0	0	0	0	0	0	0	0	0	0	0	0	0	0	0	478370	994270	3386240	0	8119620	0	6954000	11985900	14740200	0	0
CCL18	P55774	C-C motif chemokine 18	0	0	0	0	0	0	0	0	0	0	0	0	0	0	0	0	0	0	0	23728000	71463600	23667000	10442000	60005600	23709000	32874000	4386800	0	35990400	0	0	19118000	0	0	0	34332000	30715500	19851840	37276100	29508100	97121500	65697000	56946000	24826600	3436700	480339000	0
CCL19	Q99731	C-C motif chemokine 19	0	0	0	0	0	0	0	0	0	0	0	0	0	0	0	0	0	0	0	0	0	0	0	0	0	0	0	0	0	0	0	0	0	0	0	0	16710000	6676100	554650	64096600	1868800	37735000	37808600	2994600	0	0	0
CCL21	O00585	C-C motif chemokine 21	0	0	0	0	0	0	0	0	0	0	0	0	0	0	0	0	0	0	0	0	0	0	0	0	0	0	0	0	0	0	0	0	0	0	0	0	20359700	5310200	5493100	24230000	1638200	3339100	17094000	2516000	1626360	0	0
CCN2	P29279;P29279-2	CCN family member 2	47576000	0	11399000	0	23390000	0	27952000	0	0	0	0	0	0	11845000	13329000	35501000	0	0	0	51618000	29411500	6634200	35216000	9878500	39612000	55975000	7959900	3580000	12199100	0	0	18846600	11992900	8282800	20408500	4030400	23267000	15434000	3832300	3926500	0	1122100	0	8383100	0	130530000	0
CCN3	P48745	CCN family member 3	402780000	138428200	118058800	99542000	87610800	0	306113000	6651700	66103600	114888600	0	188196300	39594400	20007600	219398000	309754000	237259000	76261000	157327000	403146000	209407900	112919700	588482000	216626300	418418000	365851000	113254100	31466100	50586000	12997200	86719300	464996000	127333300	121966100	155940200	225471400	3285332600	4426448100	2248909000	1577585300	2265838200	2846308200	3456455700	2884979700	2000382300	580248200	112095900
CCS	O14618	Copper chaperone for superoxide dismutase	0	0	0	0	0	0	0	0	0	0	0	0	0	0	0	0	0	0	0	0	0	0	0	0	0	0	0	0	0	0	0	0	0	0	0	0	0	0	0	452050	2245780	41966000	0	0	159073100	103368500	0
CCT2	P78371;P78371-2	T-complex protein 1 subunit beta	0	0	0	0	0	0	0	0	0	0	0	0	0	0	0	0	0	0	0	0	18577200	22740400	0	0	2341083000	2755300	0	1324990400	104669300	876744000	37490000	185562600	66605400	633911400	4352600	17190000	887270	4942100	2105450	180923600	0	220522500	4127500	389550	424400000	177391100	0
CCT3	P49368;P49368-2	T-complex protein 1 subunit gamma	0	0	0	0	0	0	0	0	0	0	0	0	0	0	0	0	0	0	0	1415300	11357600	40876200	0	0	37948800	0	1102000	201587000	76445400	340679800	4249500	56122000	21536000	34511000	0	0	227780000	351788830	292133190	500839200	236206680	762022600	354166660	250976800	895932100	493033600	0
CCT4	P50991;P50991-2	T-complex protein 1 subunit delta	0	0	0	0	0	0	0	0	0	0	0	0	0	0	0	0	0	0	0	0	14411500	10891000	0	0	50257000	0	0	338094700	78501700	485256240	21994900	57935100	44104200	50823800	0	0	0	0	4321430	119707700	492570	423261400	0	141430	767407000	394327450	0
CCT5	P48643;P48643-2	T-complex protein 1 subunit epsilon	0	0	0	0	0	0	0	0	0	0	0	0	0	0	0	0	0	0	0	0	2377800	6446900	0	0	23712300	0	0	188375200	42760900	182467500	8848600	41520400	8904100	53588800	0	0	6309600	1572600	4140400	131069200	2061800	255380700	7448700	6665400	624177700	509627800	0
CCT6A	P40227;P40227-2	T-complex protein 1 subunit zeta	0	0	0	0	0	0	0	0	0	0	0	0	0	0	0	0	0	0	0	0	9868500	12806108	139943000	0	102394400	0	0	455161707	113758320	711500989	26919100	154036131	115115580	156843692	8439700	0	1314100	0	4953914	170518233	1256200	286537232	0	0	525041838	247094177	0
CCT6B	Q92526;Q92526-2;Q92526-3	T-complex protein 1 subunit zeta-2	0	0	0	0	0	0	0	0	0	0	0	0	0	0	0	0	0	0	0	0	0	116892	0	0	0	0	0	1923293	564580	3867011	0	951469	151520	422808	0	0	1314100	0	775786	22639367	0	41982468	0	0	23601262	44745023	0
CCT7	Q99832;Q99832-2;Q99832-3;Q99832-4	T-complex protein 1 subunit eta	0	0	0	0	0	0	0	0	0	0	0	0	0	0	0	0	0	0	0	0	5911600	9423400	12304500	0	6866000	9525700	0	94692300	33061000	156112900	2407200	65201700	5948900	9762000	3279300	4184200	0	355320	6842140	156137500	0	389230700	670370	591320	625997800	325174900	0
CCT8	P50990;P50990-2;P50990-3	T-complex protein 1 subunit theta	0	0	0	0	0	0	0	0	0	0	0	0	0	0	0	0	0	0	0	2729700	19528200	15393900	6188400	0	37972500	0	1906500	282682500	123631200	406425000	12743400	72871800	26358400	122478300	0	0	0	0	11232290	190646130	831090	450413430	1554700	1199600	807708800	620787400	0
CD109	Q6YHK3;Q6YHK3-2;Q6YHK3-3;Q6YHK3-4	CD109 antigen	16835500	0	0	0	0	6414000	8357700	5997200	0	0	0	9127500	0	0	11200000	0	0	0	0	0	0	0	0	0	0	0	0	0	0	0	0	0	0	0	0	0	606819300	556096900	485967700	307590100	447024100	329565800	1007456800	690029700	429660000	165526300	0
CD14	P08571	Monocyte differentiation antigen CD14	4923801000	2294901000	2393260000	7425277000	1192836300	10132583000	6169197000	2856362000	1317377000	194906400	537575000	5952834000	4977326000	750814500	9550503000	2914420000	5599570000	1999595000	3565673000	6452601200	5454534370	3163753000	13205210000	3611095500	28958388800	7406229000	3091718000	1371675400	235387200	1081542100	2526963300	9594056008	9808068000	1383217000	3846555000	5891435000	16591533000	14027350500	11036032000	11502497100	9191248320	32583482000	16054266300	11587020800	11345630000	3261219800	1990680800
CD163	Q86VB7;Q86VB7-2;Q86VB7-3;Q86VB7-4	Scavenger receptor cysteine-rich type 1 protein M130	495165400	155534100	1003412300	525036800	909229000	482464600	724369800	870812800	567451000	1589943500	235801400	2499352700	2353168000	152067800	1624505000	3834259200	485794700	231990500	323947800	595481100	544319200	524736300	671766500	405753100	2989487140	485941100	323609600	252677500	702960000	156686800	437365100	537528400	1035800700	1318505300	182280460	201069300	1189803100	2385752500	8994372700	186071040	11359894000	2610230600	767327100	2551898200	11258429000	22370240000	103785300
CD200	P41217;P41217-2;P41217-3	OX-2 membrane glycoprotein	2474200	0	0	0	0	0	38230000	0	0	0	0	0	0	0	6538000	0	22701000	0	0	0	0	0	0	0	0	0	0	0	0	0	0	0	0	0	0	0	0	0	0	0	0	0	0	0	0	0	0
CD209	Q9NNX6;Q9NNX6-10;Q9NNX6-11;Q9NNX6-12;Q9NNX6-2;Q9NNX6-3;Q9NNX6-4;Q9NNX6-5;Q9NNX6-6;Q9NNX6-7;Q9NNX6-8	CD209 antigen	0	0	0	0	0	0	0	0	0	0	0	0	0	0	0	0	0	0	0	0	0	0	0	0	0	0	0	0	0	0	0	0	0	0	0	0	16729300	12179400	13678800	8981200	0	24417000	36635000	6752300	10551600	48428000	0
CD248	Q9HCU0;Q9HCU0-2	Endosialin	0	0	0	0	0	0	15035200	0	0	0	0	0	0	0	4354400	0	5778600	0	0	15463000	8335100	9032000	11239000	1867000	0	10873000	4409400	0	0	0	13713130	11047000	10023100	22471000	27935500	8866400	454804000	127195600	72157600	360030900	208867700	127333000	573437300	68149700	51839630	49271400	0
CD27	P26842	CD27 antigen	0	0	0	0	0	0	0	0	0	192908000	0	0	0	0	0	0	0	0	0	0	0	0	0	0	0	0	0	0	29582700	0	0	0	0	0	0	0	0	0	0	0	0	0	0	0	0	0	0
CD2AP	Q9Y5K6	CD2-associated protein	0	0	0	0	0	0	0	0	0	0	0	0	0	0	0	0	0	0	0	0	0	0	0	0	0	0	0	0	0	0	0	0	0	0	0	0	0	0	0	0	392130	2431000	0	0	3991600	9064300	0
CD320	Q9NPF0;Q9NPF0-2	CD320 antigen	15285200	7655900	0	0	0	0	0	0	0	0	0	0	0	0	9446200	11607000	0	11012300	0	0	0	0	0	0	0	0	0	0	0	0	0	0	0	0	0	0	0	0	0	0	0	0	0	0	0	0	0
CD36	P16671;P16671-2;P16671-3;P16671-4	Platelet glycoprotein 4	0	0	0	0	0	0	0	0	0	0	0	0	0	0	0	0	0	0	0	0	26597000	0	0	0	10682000	0	0	204092000	0	6220900	3385200	9151400	1508200	11867700	0	0	0	0	0	0	0	0	0	0	0	0	0
CD37	P11049;P11049-2;P11049-3	Leukocyte antigen CD37	0	0	0	0	0	0	0	0	0	0	0	0	0	0	0	0	0	0	0	0	0	0	0	0	0	0	0	0	39860800	88495000	0	0	0	0	0	0	0	0	0	0	0	0	0	0	0	35018000	0
CD40	P25942;P25942-2	Tumor necrosis factor receptor superfamily member 5	0	0	0	0	0	0	0	0	0	0	0	0	0	0	0	0	0	0	0	0	0	0	0	0	0	0	0	0	10106100	46912000	0	0	0	0	0	0	0	0	0	0	0	0	0	0	0	0	0
CD44	P16070;P16070-10;P16070-11;P16070-12;P16070-13;P16070-14;P16070-15;P16070-16;P16070-17;P16070-18;P16070-19;P16070-3;P16070-4;P16070-5;P16070-6;P16070-7;P16070-8;P16070-9	CD44 antigen	193773900	208444000	171610000	360260000	223332000	190130000	367450000	215330000	17535000	123962000	41444000	251230000	238230000	51225000	505380000	318170000	373680000	190478400	262250000	426600000	530660000	119270000	582640000	147730000	1213560000	505240000	271721000	406585200	42687000	513484000	72610000	552520000	385150000	97301000	230590000	399310000	224890000	635749000	648973000	234963000	283280000	299137100	692434000	911584000	602875000	328935000	45702000
CD47	Q08722;Q08722-2;Q08722-3;Q08722-4	Leukocyte surface antigen CD47	0	0	0	0	0	0	0	0	0	0	0	0	0	0	0	0	0	0	0	0	22473400	4431400	87088000	0	480130000	0	2978700	613230000	85268000	1218300000	28858000	115359000	27715000	122753000	0	0	0	0	0	0	0	0	0	0	0	0	0
CD48	P09326;P09326-2	CD48 antigen	0	0	0	0	0	0	0	0	0	0	0	0	0	0	0	0	0	0	0	0	0	0	0	0	0	0	0	0	0	0	0	0	0	0	0	0	0	0	0	0	0	0	0	0	0	77034000	0
CD55	P08174;P08174-2;P08174-3;P08174-4;P08174-5;P08174-6;P08174-7	Complement decay-accelerating factor	315473600	153302400	127967200	461740000	120187000	0	270820000	189267000	73940000	76120400	0	224028000	24003800	38706400	255677000	309510000	448097000	198488000	189746000	123123800	57924500	25800900	565078000	88885000	210999000	140854000	28623400	28544000	23896500	44379000	31341400	119373000	67902000	21515000	129808700	89650000	31524100	14624200	12395040	5810000	24453700	17126700	13930800	24927260	31673000	73557000	0
CD59	P13987;P13987-2	CD59 glycoprotein	1338462000	485370000	505072000	1158212000	1044969000	121640000	1096469000	594666000	455807000	695011500	0	793329100	353636700	498305000	752672000	905728000	983644000	1029090000	598421000	1363810000	908802000	840226000	2323260000	876924700	1417543100	1475418000	600726900	1254287000	248580600	965269000	507171000	1213809000	833068000	713347000	648814000	826733000	208154600	408646000	611786000	92973200	523974000	121690800	197464900	298010000	520993000	426388000	153444000
CD5L	O43866	CD5 antigen-like	7204500	0	0	0	0	0	54685000	285558000	0	70726900	164429000	92911000	260413000	7866400	57973500	3069400	0	7598100	0	0	0	0	2274300	0	112505000	10540200	20886200	0	12798700	340378000	12934700	3068900	8148500	5551000	0	0	65026200	142095440	210751300	169955900	59899000	555873000	602452000	651846600	131202500	766134000	0
CD74	P04233;P04233-2;P04233-3;P04233-4;P04233-5	HLA class II histocompatibility antigen gamma chain	44208000	20576000	0	0	14493000	15905200	21007000	8441000	12066000	0	0	33361000	0	14967000	110040000	21702800	16995000	34149000	0	8987600	0	9050500	66284000	0	178724000	11460000	3407700	62197000	16899700	19044000	0	24447000	64229000	39843600	0	0	43709000	16208000	10339000	77977000	10140000	623789400	110481600	7740600	6194000	64558700	0
CD81	P60033	CD81 antigen	0	22246100	11267000	0	0	0	0	0	10873000	9681700	0	0	0	26193000	0	0	0	33207000	0	12520000	113552000	75456800	14295000	31495000	52365000	0	19906800	591792000	108052000	546128000	60596900	217459100	69413600	109810000	5598500	10473000	705390000	1205579000	1780802000	320910000	1531561000	662150000	803180000	908280000	1305276000	650426500	0
CD82	P27701;P27701-2	CD82 antigen	0	0	0	0	0	0	0	0	0	0	0	0	0	0	0	0	0	0	0	0	0	0	0	0	0	0	0	0	0	0	0	0	0	0	0	0	25889400	137420400	392746000	5616800	283256700	75265200	32259000	154486600	240574900	110993600	0
CD84	Q9UIB8;Q9UIB8-2;Q9UIB8-3;Q9UIB8-4;Q9UIB8-5;Q9UIB8-6	SLAM family member 5	0	0	0	0	0	5879700	0	0	0	39876300	0	0	0	0	0	24481000	0	0	0	3926000	8477800	3133700	0	0	0	6696400	4547900	0	59993000	0	0	0	16086500	4464200	16688000	7559200	0	0	3929200	1403400	6271000	0	0	0	1745600	89155000	0
CD9	P21926	CD9 antigen	0	0	0	0	0	0	0	0	0	0	0	0	0	0	0	0	0	0	0	0	6591900	0	0	0	0	0	7538000	1891895000	8743900	1352299000	5510200	352567000	0	7814100	0	0	227440000	632430000	810430000	96604000	538840000	252240000	343360000	479430000	591790000	282410000	0
CD93	Q9NPY3	Complement component C1q receptor	17970650	8295480	4593901	19961626	6650686	11225439	18638979	4446555	6888464	3900893	576408	3583555	4096792	2897368	7750392	5827693	8881626	14590820	3058179	138138881	71365495	47689054	203450869	84868095	144062876	139518624	47789144	19596351	16766187	13522046	34395249	97765227	37938479	51587066	72590025	48740000	149617524	58543933	133785780	120904289	86716876	73890107	153875566	85972942	80787105	32754117	0
CD99	P14209;P14209-2;P14209-3	CD99 antigen	10648000	0	10337000	0	0	32270000	21014000	14662000	0	0	0	31718000	6683100	0	0	21399000	28947000	6759500	28253000	0	0	0	0	0	0	0	0	0	0	0	0	0	0	0	0	0	216175000	185273000	170728500	131836000	268356600	200752000	222603400	317200000	297463000	233297300	0
CD99L2	Q8TCZ2;Q8TCZ2-2;Q8TCZ2-3;Q8TCZ2-5;Q8TCZ2-6	CD99 antigen-like protein 2	63130000	10802000	0	0	18059000	62219700	118079000	0	3904300	18340800	0	42651000	9840000	0	21916100	77164000	77500400	16695700	5649100	130309000	25877000	4742500	296115000	63320000	116842700	108010000	41442600	11134500	152864000	0	136380500	110588900	23121100	17450000	70493000	0	563861800	382247800	223655000	248769500	386637900	197423800	511199000	310477400	188231600	294182300	0
CDC37	Q16543	Hsp90 co-chaperone Cdc37	0	0	0	0	0	0	0	0	0	0	0	0	0	0	0	0	0	0	0	0	0	3537900	0	0	0	0	0	91804000	12197000	26926000	0	0	0	0	0	0	1365200	0	0	23558900	7206000	23572900	9636400	503860	6077700	84241790	0
CDC42	P60953;P60953-1	Cell division control protein 42 homolog	0	0	0	0	0	0	0	0	0	0	0	0	0	0	0	0	0	0	0	0	161600100	137123005	8563901	52182775	171034089	10721000	21422000	1321704374	166137336	1457742194	44970916	384500909	75111000	113725300	0	0	4748100	9381640	24617206	35441273	12225835	105927652	3063467	5777785	188071669	168946738	0
CDH1	P12830;P12830-2	Cadherin-1	0	0	0	0	0	0	0	0	0	0	0	0	0	0	0	0	0	0	0	0	0	0	0	0	0	0	0	0	0	0	0	0	0	0	0	0	44999400	49166000	19747200	32728000	21719000	25719100	32208000	50604000	21997900	0	0
CDH10	Q9Y6N8	Cadherin-10	10596000	0	0	14387550	0	0	19529500	0	0	0	0	0	0	0	5563000	0	6723819	0	0	70263672	35453195	10547493	117991955	30614123	76668182	79218849	17163423	0	3674048	0	5065435	46458408	28970557	5023553	68313481	16754035	649759358	235735590	115560005	191312054	278309715	225311343	759514819	149272817	96777593	19079212	19337175
CDH11	P55287;P55287-2	Cadherin-11	37334000	3969300	0	42549208	0	42605500	43809096	0	3712700	0	0	0	0	0	34892794	1506588	24979767	0	19372000	275188470	170294400	42947700	496839000	137029000	349272000	289457200	76960600	6581100	32240100	30929600	64393300	317039800	216610400	67829400	95265000	128083500	427497410	484019768	349362726	68459172	327432917	146100075	774925717	249869789	223811473	355687036	10101900
CDH12	P55289;P55289-2	Cadherin-12	0	0	0	0	0	0	0	0	0	0	0	0	0	0	0	0	0	0	0	0	0	0	0	0	0	0	0	0	0	0	0	0	0	0	0	0	82646006	36819312	22858912	44173202	43430470	27165774	133443038	13279940	14679371	331610	0
CDH13	P55290;P55290-2;P55290-3;P55290-4;P55290-5	Cadherin-13	866570000	191159000	325037900	1551275000	133689000	667865000	1325588000	169689000	70922600	75504000	0	326631000	121378000	73105300	1102101000	520653000	773287000	403890700	238887400	1990892300	683707600	146311700	3182005000	643895000	1494281500	1992759100	315767000	84897500	127655300	78689300	267670200	2061954600	862616200	321365500	972931200	616604900	1255725700	849429300	517810700	1158314900	709639400	421779700	1101171800	357358100	367748700	1281927000	626443200
CDH15	P55291	Cadherin-15	32365500	0	5203400	0	55353000	58295700	41785800	6590000	13865200	0	0	38220000	0	0	0	0	204538800	7490700	7046000	596051500	70840200	26611900	374312000	463965000	979243200	407013500	154628800	19431900	0	0	110962000	236863900	115459900	21583100	598515200	140516000	1305580800	628039680	322080800	235120000	1626178400	999475500	1921198000	756793800	480847000	11571440	91104300
CDH18	Q13634;Q13634-2	Cadherin-18	0	0	0	0	0	0	0	0	0	0	0	0	0	0	0	0	0	0	0	0	0	0	0	0	0	0	0	0	0	0	0	0	0	0	0	0	40921824	18395711	11033105	30638705	20437127	15990228	18734270	12070204	5098000	2681300	0
CDH19	Q9H159;Q9H159-2	Cadherin-19	0	0	0	0	0	0	0	0	0	0	0	0	0	0	0	0	0	0	0	0	0	0	0	0	0	0	0	0	0	0	0	0	0	0	0	0	12176100	13941200	12866500	5168700	12801400	3333000	11402000	10339300	20966100	8194700	0
CDH2	P19022;P19022-2	Cadherin-2	1395483400	621749000	510172400	2170093000	733097900	1199890000	1384426200	402509900	385482400	141587000	67113800	709761200	211390400	314826900	1108080200	908775100	1517619000	775188900	480349100	2552449000	1704504200	356529400	3774319700	1110953000	2283569000	2340843000	1030944300	301604000	239501800	91942700	526962200	2569808000	947205000	546988200	1298805000	1397819000	7578684000	6236173000	5172233000	5354991000	6124501000	3093466700	9363570000	5207723000	4136807000	2949985000	859856400
CDH20	Q9HBT6	Cadherin-20	0	0	0	0	0	0	0	0	0	0	0	0	0	0	0	0	0	0	0	29319808	35563423	2901100	73018907	17890937	71107469	20434533	15674637	0	0	2264400	7657238	59208795	33333250	4089250	27947996	7091500	99502284	108454585	61848400	12836369	121508723	55600344	125021826	92556899	69698789	17585400	0
CDH22	Q9UJ99	Cadherin-22	0	0	0	0	0	0	0	0	0	0	0	0	0	0	0	0	0	0	0	26202600	4177700	0	38190000	10183000	0	6364100	0	0	0	0	0	0	0	0	15759200	0	247459000	65244200	44700500	332331600	113768700	111385200	314769900	135700900	45095300	0	0
CDH4	P55283;P55283-2	Cadherin-4	43961000	5808700	29557000	120076000	4804100	62684000	73058000	38370000	11731000	4410900	2927200	40116000	12913400	3727400	36881000	58126000	84764000	27418000	37740000	79916000	12384000	7227500	183129000	38319000	121862000	80326000	5257200	0	9128500	0	18279100	0	0	0	41080200	0	455710000	344039200	340629640	283916100	363929800	212248000	509267000	408050000	213418300	148580500	37276300
CDH5	P33151;P33151-2	Cadherin-5	0	0	3377200	6242500	0	11716900	0	0	0	0	0	0	2363100	0	0	0	0	5594000	0	64942900	55731000	14803500	102579700	75513600	23043400	47316600	6875600	4665400	14746800	15557700	8208700	43296000	37927600	12648000	25712900	67312300	0	0	0	0	4625800	0	0	0	0	88055900	0
CDH6	P55285;P55285-2	Cadherin-6	12454000	0	0	38884450	0	15489300	17752000	0	0	0	0	0	0	0	5563000	0	26365181	0	0	531599482	168143069	55795254	1000504250	347512341	422105879	533425228	134334851	3386200	24647424	0	85888418	531999826	231836597	53918617	196484292	174366868	1980679654	1980641031	511965473	246687490	714548084	390285580	2059150239	699268190	363265088	306436945	20588425
CDH7	Q9ULB5	Cadherin-7	8959400	3306800	0	8176773	3698500	9607500	13116508	0	4254400	927500	0	5206300	0	0	872053	9052425	649040	5176400	4057400	121026892	22611077	0	155557093	85659263	79579731	124048467	22206463	0	0	2264400	10818962	105678305	24589950	4089250	79756604	5192800	534360236	343943421	116311714	1245115479	419873728	1512857531	671651745	480944271	818619554	3166245	0
CDH8	P55286	Cadherin-8	0	0	0	27768719	0	0	14840396	0	0	0	0	0	0	0	872053	1506588	26013993	0	0	275376300	119451000	37872800	808905000	145276800	185388000	376257600	22286700	116421000	83620200	187738600	47715200	313539000	86906900	77752000	161344800	41601300	1547984028	473669137	514305070	524286251	738804663	260947165	2048531250	411646953	329363824	317595775	28336800
CDH9	Q9ULB4	Cadherin-9	0	0	0	0	0	0	0	0	0	0	0	0	0	0	0	0	0	0	0	12503846	2634136	3552352	22597395	5321135	13389340	13912923	3041026	0	1835728	0	251247	9059865	4274845	247630	3983028	5874898	293306300	91735144	60801995	75150988	126131973	92154861	387303796	41816898	20805207	15622218	0
CDHR1	Q96JP9;Q96JP9-2	Cadherin-related family member 1	0	0	0	0	0	0	0	0	0	0	0	0	0	0	0	0	0	0	0	0	0	0	0	0	0	0	0	0	0	0	0	0	0	0	0	0	2120500	17648400	72835600	23951400	36123700	6993500	11037700	21885600	21617200	1333890	0
CDK5	Q00535;Q00535-2	Cyclin-dependent kinase 5	0	0	0	0	0	0	0	0	0	0	0	0	0	0	0	0	0	0	0	0	0	0	0	0	0	0	0	21844700	1121100	20499900	0	0	0	0	0	0	0	0	0	0	0	0	0	0	0	0	0
CDS2	O95674	Phosphatidate cytidylyltransferase 2	0	0	0	0	0	0	0	0	0	0	0	0	0	0	0	0	0	0	0	11424000	17643000	9492500	2464100	34814000	12377000	15648000	9054100	60213000	6111000	25926000	8196100	17868000	0	13333000	11354000	17110000	0	0	0	0	0	0	0	0	0	0	0
CDSN	Q15517	Corneodesmosin	0	0	0	0	0	0	0	0	0	16341700	0	0	0	0	0	0	0	0	0	3974000	16395000	7526300	31604000	0	0	0	186691000	15921000	0	0	4809400	38200000	32074000	0	0	0	0	0	0	0	0	0	0	0	0	0	15714900
CDV3	Q9UKY7;Q9UKY7-2;Q9UKY7-3	Protein CDV3 homolog	0	0	0	0	0	0	0	0	0	65919600	0	0	0	0	0	9163400	0	0	0	0	0	0	0	0	0	0	0	0	0	0	0	0	0	0	0	0	461440	0	3598200	2436500	7114600	4530100	1622900	0	14633880	376597100	0
CEACAM6	P40199	Carcinoembryonic antigen-related cell adhesion molecule 6	0	0	0	0	0	0	0	0	0	0	0	0	0	0	0	0	0	0	0	0	0	0	0	0	0	0	0	83972000	0	8572600	0	0	0	0	0	0	0	0	0	0	0	0	0	0	0	0	0
CEL	P19835;P19835-2	Bile salt-activated lipase	0	3763100	5127200	0	12922000	0	0	0	11636100	0	0	14291100	0	38301100	0	5854900	0	70738400	13792300	0	0	0	0	0	0	0	0	0	0	0	0	0	0	0	0	0	499513200	1245822900	1884462400	55403470	2141098400	257033850	579339640	1592750400	1883296840	524748510	0
CELSR2	Q9HCU4	Cadherin EGF LAG seven-pass G-type receptor 2	94778000	24351900	8702900	60138000	37486900	38707000	46626000	0	6113400	0	0	0	0	27267500	47170000	13789000	55883000	31463700	19923900	180141000	61718700	16785400	385194000	54850700	125181000	130281000	25545000	12214200	6014700	15405000	7236800	161596000	49964000	25261200	96229400	79709800	912008700	351947240	227620640	1285039600	349622200	348650400	871795400	283435400	219609000	52400620	23466000
CEMIP	Q8WUJ3;Q8WUJ3-2	Cell migration-inducing and hyaluronan-binding protein	0	0	0	0	0	0	0	0	0	0	0	0	0	0	0	0	0	0	0	0	0	0	0	0	0	0	0	0	0	0	0	0	0	0	0	0	1445768700	1230161290	796331670	956015900	1028378400	940210400	1471656100	1527175500	660062460	115378080	0
CEND1	Q8N111	Cell cycle exit and neuronal differentiation protein 1	0	0	0	0	0	0	0	0	0	0	0	0	0	0	0	0	0	0	0	0	0	0	2026600	0	76643000	0	0	330609300	132642200	196651500	12128900	110305100	9048500	17176100	0	0	0	0	0	0	0	0	0	0	0	0	0
CETP	P11597;P11597-2	Cholesteryl ester transfer protein	0	0	0	0	0	0	0	0	0	0	0	0	0	0	0	0	0	0	0	0	0	0	0	0	0	0	0	0	0	0	0	0	0	0	0	0	183077400	189560100	133429300	367245700	23008500	118085400	751116000	547678000	74274540	32618990	0
CFB	P00751;P00751-2	Complement factor B	5351643900	6788413700	6969603300	6419378000	6251225200	5654866000	12499879000	7208217400	2214200400	2426072000	1347649600	8456637000	3087898400	4063459900	5865732900	5218858300	12033689000	4402686500	10993996000	5000227100	7486101200	5468164200	11484360100	18676538000	13325717700	15261386000	5564007300	480533700	1521638300	2123787200	4260243900	10269044000	4392576600	3335938200	6674318600	13261432900	7686343600	17810266600	10376177400	5381303880	8911262500	14113246900	15009204070	8478479900	7580233800	13916892820	921106800
CFD	P00746	Complement factor D	502125000	188127000	327239000	448170000	393786000	567659000	326358000	511634000	229263200	58276500	53361000	456631000	197798000	143157000	972086000	650918000	410054000	359962000	434773000	1162111000	1109976000	553242000	2469896000	1256837000	3029423000	974281000	1196894000	232427400	145231300	306175000	645704000	901099000	1560800000	830843000	719355000	2125319000	8323800450	7964525120	5512516200	16946236800	7224464100	14455726510	8191720100	12022279100	7165657070	1546512000	89264700
CFH	P08603;P08603-2	Complement factor H	10827743488	7931444448	11433930392	14944723760	8055035722	2924476938	17136975581	12776177877	4251505855	3828247743	2948779581	14415107158	7637936746	6132925198	15531892052	14897513663	15686767579	7107929594	14333992592	6453120891	7564947744	3831787563	16510191325	13538993713	13190747084	12192373470	5256988394	999418864	1392251003	4448607736	3716424395	12331314856	5225174023	4400249275	6062125418	10966200135	121111840414	127322016649	89487903702	116278047540	75699421307	145199865169	138715846616	113673997574	76472611352	60093057167	528804082
CFHR1	Q03591	Complement factor H-related protein 1	24030761	221288334	739762717	503747983	352848007	139539149	543432775	434853030	183982248	171397793	74730708	161299883	407507598	177070139	412670845	438016511	744024033	576463329	440654506	12966578	231835554	352334188	652123323	672836476	428214289	410750281	331004479	75945375	85696129	156687971	68542566	293706620	231017558	174660380	283583280	342892442	468705000	4212550223	10034207572	8884820285	5297982757	3621469720	5301303428	7754558371	5716082503	1913877128	1137218
CFHR2	P36980;P36980-2	Complement factor H-related protein 2	105317850	104961385	338138186	244577196	118997513	3914404	373325923	166827367	71194036	111492710	15405138	36388572	69834396	187121373	228567507	50079386	308675170	158576292	330034721	35524131	122870902	138992549	357331352	170301411	219198727	262782049	64530127	6406061	57372068	19643593	14275939	207793824	73469319	32411045	95860402	310433923	121942698	656912587	1866461247	1394587500	911447406	492462844	1027345544	1188586645	1315914573	968344211	5039500
CFHR3	Q02985;Q02985-2	Complement factor H-related protein 3	18353641	16458833	30355705	34004060	11574058	1101709	18951721	26334826	17097960	4418454	3385173	28814387	8609760	16090290	23457596	24753440	17761518	10862985	23398181	0	0	0	0	0	0	0	0	0	0	0	0	0	0	0	0	0	34336558	67972928	123829534	162493251	46308880	94861332	99150937	99951378	134333907	63718467	0
CFHR4	Q92496;Q92496-2;Q92496-3	Complement factor H-related protein 4	0	0	0	0	0	0	0	0	0	0	0	0	0	0	0	0	0	0	0	0	0	0	0	0	0	0	0	0	0	0	0	0	0	0	0	0	7365700	14842819	74091333	16928268	20563218	76791072	122572661	39312373	19546647	9485427	0
CFHR5	Q9BXR6	Complement factor H-related protein 5	0	0	0	0	0	0	0	0	0	0	0	0	0	0	0	0	0	0	0	0	0	0	0	0	0	0	0	0	0	0	0	0	0	0	0	0	115147630	196702894	718692512	485306356	211591673	225030863	545738214	338111959	173138318	20729439	0
CFI	P05156	Complement factor I	570386400	620966200	1166757100	1326255000	361717700	693724000	2129692000	996228400	349392300	112997700	227888400	1338691000	719784600	290957000	1189598100	1321674000	1554737000	612413200	1482319800	777046600	1077971000	556634200	1307237500	1481322300	1500489100	2031229000	609177200	174255100	156036700	513417900	430144900	1303884400	588067700	545735700	663936500	1648015000	852922000	1401794000	1230406000	541677900	1430632000	1111481000	1708268000	965499000	1083384000	2889833000	137332200
CFL1	P23528	Cofilin-1	29745622	7966300	31919821	0	57655014	53211008	26544000	10445000	95343134	408087384	225056699	10749737	70998938	239024912	24855970	182898703	4770500	22413000	12694000	331541035	786667276	1226010562	216653211	368612226	1143705423	408749049	314484947	4120277485	3146487214	6787157362	860569585	3289355564	1183798119	2396012000	175215261	245153982	539401645	240920802	622206264	933473064	1144098140	1915258555	1003296174	426343194	1281562484	4058133011	38387300
CFL2	Q9Y281;Q9Y281-3	Cofilin-2	4534778	0	3529179	0	7477986	19213992	0	0	5911766	67162316	14647201	6869463	6553162	25400088	3518630	12853297	0	0	0	33785465	40975624	62039938	8216089	10682674	25771377	26370151	40564353	632853515	154397686	744209638	55904015	415203436	48644681	92512300	10886039	6741218	60156255	47056098	72744936	165158936	95595660	202789345	113159226	62770606	184322116	779154189	0
CFP	P27918	Properdin	2247300	0	6373800	9123900	0	0	0	27742400	0	113178500	2388400	16419000	4124900	0	0	29289000	0	0	0	0	2367400	2435900	0	24353000	0	4447300	0	0	15952300	9182100	0	3744200	0	13484600	0	13286200	128115340	241026500	230180000	57332090	114193800	97016700	83214100	331121000	162515500	958839000	0
CGREF1	Q99674;Q99674-2;Q99674-3	Cell growth regulator with EF hand domain protein 1	397616000	120130000	51105000	145195000	135755000	150553500	292549000	55078000	25192700	83147400	0	153354100	14802000	53937000	162855000	193476000	482664000	129089000	63629000	904226000	530112100	91678600	766898900	452511600	726905800	492086000	170078600	65854270	142605500	7608600	132460600	881600200	314848100	189650400	478766000	104920100	3698078400	976052700	453023000	1911181500	983174600	1274768000	2733304000	1045171000	471545600	413850700	359833600
CHAD	O15335	Chondroadherin	0	0	0	0	0	0	0	0	0	0	0	0	0	0	0	0	0	0	0	0	0	0	0	0	0	0	0	0	0	0	0	0	0	0	0	0	1251984500	990240800	120861200	844203600	423047900	111989300	1317351000	451666400	106449740	3053430	0
CHADL	Q6NUI6;Q6NUI6-2	Chondroadherin-like protein	0	0	0	0	0	0	0	0	0	0	0	0	0	0	0	0	0	0	0	0	0	0	0	0	0	0	0	0	0	0	0	0	0	0	0	0	2020600	1888800	819360	0	3437200	572030	2003100	5424300	726610	0	0
CHCHD3	Q9NX63	MICOS complex subunit MIC19	0	0	0	0	0	0	0	0	0	0	0	0	0	0	0	0	0	0	0	0	0	0	0	0	28426000	0	0	190854000	20758600	154960600	0	34388000	0	0	0	0	0	0	0	0	0	0	0	0	0	0	0
CHCHD6	Q9BRQ6	MICOS complex subunit MIC25	0	0	0	0	0	0	0	0	0	0	0	0	0	0	0	0	0	0	0	0	0	0	0	0	0	0	0	39881000	1188800	76598000	0	0	0	0	0	0	0	0	0	0	0	0	0	0	0	0	0
CHGA	P10645	Chromogranin-A	34958990000	9997172000	6829991000	6610242000	8994875000	4203171800	23381474000	5205225000	6168473000	10249073800	787201200	7866582000	2797062600	8052059700	23865147000	14469463000	20807705000	11892669200	6144185000	22006274370	9246752100	2277647270	48629349210	7293864900	22196187750	22400743400	2854197020	2877248260	2258680230	617728700	2151915600	24569937660	8998461100	5085006300	11610874640	5611546100	66005788500	18679350100	12545965200	76390244000	15817742000	21180298400	57613034050	12865806900	10307207100	13890407630	5379500100
CHGB	P05060	Secretogranin-1	22263042500	7586487000	7390400800	3656502500	17929681800	7954138800	16970916300	8946302700	9066451900	4697720500	653989520	14434560100	4581403700	5574434800	12543890000	16606827600	23563679000	12545414300	8067886800	17842197650	5910418660	3479900600	41747504730	16915387270	28315730330	22046397340	5599491020	3750353700	1426224850	418430820	4206699800	18112296940	7296747710	6445806520	12835217000	7894009700	52302703360	19622019900	17475942400	50639911000	32528768900	26638232000	49148839000	29205625000	16954939400	9997457860	3570063830
CHI3L1	P36222	Chitinase-3-like protein 1	1189244600	1883311000	1158838600	4202857000	2243797000	6492815800	1835069000	6920759000	1256563500	1183238200	429403000	3478968000	674602500	6355414800	8167232000	1260986000	1318929300	1871758000	3087277000	2419883400	3647187000	2844198600	4899963000	1646226000	8961784000	2684298000	5311947700	357936600	399793400	380710500	1070709300	5538623000	5365295000	450523300	1049535900	3820419000	8416899200	10417236100	1640010760	738371450	585990660	10187776000	413611900	22560419000	308106120	2672749700	438119200
CHI3L2	Q15782;Q15782-5;Q15782-6	Chitinase-3-like protein 2	46686200	9883900	0	284911000	44997300	7027600	0	0	0	0	0	154893000	0	46366000	16028100	5654100	6145300	11898000	112337000	59795000	77336400	2160616400	294349700	105804100	34128000	27418000	68561600	0	14853000	0	105684700	194574000	72390800	0	61666600	96823000	78660600	100482300	16163800	923995400	723325000	251310600	164411600	34002200	72017800	117232200	29740900
CHID1	Q9BWS9;Q9BWS9-2;Q9BWS9-3	Chitinase domain-containing protein 1	0	0	0	0	0	0	0	0	0	0	0	0	0	0	0	0	0	0	0	0	0	0	0	0	0	0	0	0	0	0	0	0	0	0	0	0	282475000	577309700	67836200	89650300	80350900	14286100	158817420	78401190	35375910	1036430	0
CHIT1	Q13231;Q13231-2;Q13231-3;Q13231-4	Chitotriosidase-1	4354400	0	175820000	718887500	1564590000	0	0	92316800	0	0	0	0	2798100	0	15914600	0	0	9138600	48474800	22034000	0	186421500	1526141100	2367216000	0	0	488942200	0	112540000	52922000	38245700	0	0	0	0	63214900	0	0	4270100	17568600	237687500	0	0	837840	0	0	0
CHL1	O00533;O00533-2	Neural cell adhesion molecule L1-like protein	11527781670	3502867500	2750900800	11121356000	4700180000	3017700000	8842014000	2255008600	2161345100	2125077500	207834700	3754570000	1030660600	1225561900	7144421300	5498903900	9524584000	4284101800	2704285000	9558309850	3511603200	964795000	16510336000	5038974100	6612608600	8749792700	1663056400	695457600	1197585700	221136600	1060338700	7867007000	2740720300	1716807800	5190022900	2922805000	29202487600	23860929400	16216307500	5678733700	32340678300	5522516500	19027773400	9883570520	14732143000	19097407970	1774372400
CHMP4A	Q9BY43;Q9BY43-2	Charged multivesicular body protein 4a	0	0	0	0	0	0	0	0	0	0	0	0	0	0	0	0	0	0	0	0	0	0	0	0	0	0	0	0	0	0	0	0	0	0	0	0	18783000	5836400	73962000	138038500	16882240	117306800	92778000	71648000	61642100	13145300	0
CHMP4B	Q9H444	Charged multivesicular body protein 4b	0	0	0	0	0	0	0	0	0	0	0	0	0	0	0	0	0	0	0	0	0	4997200	0	0	0	0	0	51161100	13951900	98805000	1259700	0	0	6547600	0	0	1758400	741560	8315500	6264700	8044800	18367700	4595700	0	2799700	29455400	0
CHORDC1	Q9UHD1;Q9UHD1-2	Cysteine and histidine-rich domain-containing protein 1	0	0	0	0	0	0	0	0	0	0	0	0	0	0	0	0	0	0	0	0	0	0	0	0	0	0	0	0	0	0	0	0	0	0	0	0	0	0	0	0	0	0	0	0	6326700	40896000	0
CHPF	Q8IZ52;Q8IZ52-2;Q8IZ52-4	Chondroitin sulfate synthase 2	0	0	0	0	0	0	0	0	0	0	0	0	0	0	0	0	0	0	0	0	0	0	0	0	0	0	0	0	0	0	0	0	0	0	0	0	73450300	35719300	32681240	19728200	4257130	7084160	46197800	35749110	5580590	1997800	0
CHRD	Q9H2X0;Q9H2X0-2;Q9H2X0-3;Q9H2X0-4;Q9H2X0-5	Chordin	16477700	2973100	0	25228900	7445800	0	31854400	4712600	0	0	0	17038000	0	1951600	6523100	5077600	33362400	2298300	0	0	0	0	0	0	0	0	0	0	0	0	0	0	0	0	0	0	1376154200	858196130	405550030	1772375600	566639600	1573413510	1381350600	1010001870	326268400	59423700	0
CHRDL1	Q9BU40;Q9BU40-3;Q9BU40-4;Q9BU40-5	Chordin-like protein 1	54447000	40084800	0	58832600	45626000	14633800	49434300	7070500	8684600	11187000	0	25902300	4931800	2933500	25419400	27859400	95624700	5607500	42061600	44530000	45795500	15512000	49342800	27807000	58880000	56842000	7941400	6119500	0	0	9440800	61996700	20639500	0	45826900	83811200	1321441600	1355707570	488327900	2090859800	573646900	818620000	1402348600	1195876900	289502000	80087920	0
CHST1	O43916	Carbohydrate sulfotransferase 1	0	0	0	0	0	0	0	0	0	0	0	0	0	0	0	0	0	0	0	0	0	0	0	0	0	0	0	0	0	0	0	0	0	0	0	0	238471900	135019700	62601100	253530900	81900400	59708200	256483700	96441400	20159400	415710	0
CHST10	O43529	Carbohydrate sulfotransferase 10	0	0	0	29655000	0	0	11480000	0	0	0	0	0	0	0	12137000	7172700	13915000	0	0	40576300	7500600	0	57864000	13016400	11011000	32463000	5636500	0	0	0	1816800	15160700	6837000	0	16926500	8281400	1054894000	376135900	367422000	1267138800	598796900	325084750	1046020000	474528900	262772000	53836830	0
CHST11	Q9NPF2;Q9NPF2-2	Carbohydrate sulfotransferase 11	0	0	0	0	0	0	0	0	0	0	0	0	0	0	0	0	0	0	0	0	0	0	0	0	0	0	0	0	0	0	0	0	0	0	0	0	11336000	39188300	6923030	0	2741150	17805700	25149100	15572600	6493400	0	0
CHST12	Q9NRB3	Carbohydrate sulfotransferase 12	0	0	0	0	0	0	0	0	0	0	0	0	0	0	0	0	0	0	0	0	0	0	0	0	0	0	0	0	0	0	0	0	0	0	0	0	97977140	61982500	46253520	209190900	56399800	113015000	119688500	264488500	48824300	9184900	0
CHST14	Q8NCH0	Carbohydrate sulfotransferase 14	0	0	0	0	0	0	0	0	0	0	0	0	0	0	0	0	0	0	0	0	0	0	0	0	0	0	0	0	0	0	0	0	0	0	0	0	77253400	78624300	22597560	89860400	22960400	81719300	75137400	48816500	26206000	1350600	0
CHST15	Q7LFX5;Q7LFX5-2	Carbohydrate sulfotransferase 15	3549000	0	0	13943000	0	13325700	12982400	4128900	0	0	0	7019200	0	0	10816000	9002100	26240700	0	5899500	7472400	3245100	3128900	9150800	0	8208400	6596000	0	0	0	0	4220500	0	4543100	7960400	5689500	8114800	667416000	403196000	350275000	819319000	372646000	434904000	738711000	477090000	283574900	36441370	0
CHST3	Q7LGC8	Carbohydrate sulfotransferase 3	0	0	0	0	0	0	0	0	0	0	0	0	0	0	0	0	0	0	0	0	0	0	0	0	0	0	0	0	0	0	0	0	0	0	0	0	227090100	137339600	127034000	234201000	169030000	140751100	195923000	221183900	82301600	5629430	0
CHST6	Q9GZX3	Carbohydrate sulfotransferase 6	0	0	0	0	0	0	0	0	0	0	0	0	0	0	0	0	0	0	0	0	0	0	0	0	0	0	0	0	0	0	0	0	0	0	0	0	30603650	57678200	29222980	19044120	43202500	37370000	43058700	36357500	23406400	0	0
CHST7	Q9NS84	Carbohydrate sulfotransferase 7	0	0	0	0	0	0	0	0	0	0	0	0	0	0	0	0	0	0	0	0	0	0	0	0	0	0	0	0	0	0	0	0	0	0	0	0	58598700	15693400	6877100	82990420	32273800	42467030	59571100	25895800	9404290	0	0
CHSY3	Q70JA7	Chondroitin sulfate synthase 3	0	0	0	0	0	0	0	0	0	0	0	0	0	0	0	0	0	0	0	0	0	0	0	0	0	0	0	0	0	0	0	0	0	0	0	0	12168000	10366000	0	21305400	0	7744500	6820900	0	3817400	0	0
CILP	O75339	Cartilage intermediate layer protein 1	0	0	0	0	0	0	0	0	0	0	0	0	0	0	0	0	0	0	0	0	0	0	0	0	0	0	0	0	0	0	0	0	0	0	0	0	4370900	5364200	5578490	6060320	41576400	3024170	5207500	4654280	1442180	0	0
CIRBP	Q14011;Q14011-2	Cold-inducible RNA-binding protein	0	0	0	0	0	0	0	0	0	0	0	0	0	0	0	0	0	0	0	0	0	0	0	0	0	0	0	0	0	0	0	0	0	0	0	0	0	1168200	3117500	11784930	19201000	24494100	7322000	2778600	9262300	132521000	0
CISD1	Q9NZ45	CDGSH iron-sulfur domain-containing protein 1	0	0	0	0	0	0	0	0	0	0	0	0	0	0	0	0	0	0	0	0	0	0	0	0	50850000	0	0	167554600	35509300	225991000	12858000	61940000	15625000	13792000	0	0	0	0	0	0	0	0	0	0	0	0	0
CISD2	Q8N5K1	CDGSH iron-sulfur domain-containing protein 2	0	0	0	0	0	0	0	0	0	0	0	0	0	0	0	0	0	0	0	0	0	0	0	0	0	0	0	40466000	0	49745000	0	0	5400400	0	0	0	0	0	0	0	0	0	0	0	0	0	0
CKAP4	Q07065	Cytoskeleton-associated protein 4	0	0	0	0	0	0	0	0	0	0	0	0	0	0	0	0	0	0	0	0	0	0	0	0	0	0	0	67932000	0	5663000	0	0	0	3186000	0	0	0	0	0	0	0	0	0	0	0	0	0
CKAP5	Q14008;Q14008-2;Q14008-3	Cytoskeleton-associated protein 5	0	0	0	0	0	0	0	0	0	0	0	0	0	0	0	0	0	0	0	0	0	0	0	0	0	0	0	18844500	0	0	0	0	0	0	0	0	0	0	0	0	0	0	0	0	0	0	0
CKB	P12277	Creatine kinase B-type	0	0	0	17454000	0	382140000	0	0	54623600	30537800	464911000	138643400	0	1766474500	0	0	0	4183600	0	110006400	560878200	595192100	346730000	141257100	3075509800	103041000	289469800	15089595000	1217471500	9163184000	902668000	6523781000	827901900	1666812200	43626000	99493900	383435500	189153400	494314600	3801773800	280190000	13830748500	597991800	556419000	1874674000	1757193710	15520790
CKM	P06732	Creatine kinase M-type	0	0	0	0	0	0	0	0	0	0	0	0	0	0	0	0	0	0	0	0	5051500	11648000	14472000	4617100	2210645000	21133000	4749400	0	0	4597400	4656700	0	0	12730000	10847000	0	0	0	0	0	0	0	0	0	0	0	0
CKMT1B	P12532;P12532-2	Creatine kinase U-type, mitochondrial	0	0	0	0	0	2264200	0	0	0	23290900	0	0	0	9115600	0	0	0	0	0	10722900	14253700	0	0	0	133036300	0	0	352668000	36795400	355635000	0	62572400	0	0	20380200	41362000	27945090	2501300	3985700	13329200	8174330	50248700	40618160	19035900	27819250	207891200	0
CLASP2	O75122;O75122-3	CLIP-associating protein 2	0	0	0	0	0	0	0	0	0	0	0	0	0	0	0	0	0	0	0	9634100	0	36984000	0	0	37431000	0	20779000	15409100	8193600	26217200	0	2186900	27191000	0	32006000	0	0	0	0	0	0	0	0	0	0	0	0
CLEC11A	Q9Y240	C-type lectin domain family 11 member A	17728600	8562700	0	0	6488000	17463700	34448200	0	3352900	0	0	0	3053700	0	15697000	0	48243600	0	6196600	69509800	78218000	12658000	80799000	59165000	93210000	111358800	47651100	0	1738800	0	4311500	71745300	30694400	29632000	50518000	83703000	860340300	814824900	268277500	1013962700	307780790	531916000	1666609900	528209500	261447100	31369490	27536400
CLEC14A	Q86T13	C-type lectin domain family 14 member A	0	0	0	0	0	0	0	0	0	0	0	0	0	0	0	0	0	0	0	0	0	0	0	0	0	0	0	0	0	0	0	0	0	0	0	0	18053000	9635660	4085900	18603000	10164510	10274300	21089300	12539790	12247710	1552830	0
CLEC3B	P05452	Tetranectin	3485756900	2008242000	2798851000	6098713000	1243943000	612816600	3570700000	1049091800	843638900	247481200	75325000	2520284000	1291530000	1080888000	5009274000	3289152000	4016677000	2043343000	3631009000	5166933000	3230763400	1586165000	16527180000	3652395000	6146005000	5031689000	1382831000	475132600	797458000	315242600	1955331000	6373970000	3867163000	1914239000	3437186000	4617961000	75850319900	53159588300	38181265670	197972382000	24259705210	60577374440	78038648500	30892400300	18903257900	6260229000	1191255000
CLIC1	O00299	Chloride intracellular channel protein 1	0	0	9298600	0	0	15225000	0	0	0	158196200	48999200	6323400	22772200	14259200	0	33127000	0	7965200	0	16238100	110345900	138606400	38585000	47279900	35890000	33991200	74708800	578831000	151071200	100028900	73319700	264335900	134124500	183367000	12570800	31598100	103789200	73674500	179803970	149530700	394421700	237013000	303560100	178571600	174497600	1167190400	0
CLIC4	Q9Y696	Chloride intracellular channel protein 4	9196600	0	3799000	0	0	0	5952700	0	0	0	0	3116000	0	0	0	15090000	0	0	0	2655400	5866571	1213851	0	0	0	13269400	5706500	344021018	12027300	180223300	9042500	151842024	20234197	6988300	0	4006700	163769100	66102210	125130070	85119070	68356120	85861910	177020900	185963000	60398550	296158000	0
CLIC6	Q96NY7;Q96NY7-2	Chloride intracellular channel protein 6	0	0	0	0	0	0	0	0	6774500	0	0	0	0	59787500	0	0	0	9287300	0	309985700	1856002239	4763291249	774465800	2362988700	150013100	322107200	2040729300	4488402582	94516010	904280430	403704600	2905759476	3019292403	1199333500	163972700	927803200	21558800	162983500	547806600	55185000	197806490	3154450	38715910	114451960	403289450	33328410	0
CLIP2	Q9UDT6;Q9UDT6-2	CAP-Gly domain-containing linker protein 2	0	0	0	0	0	0	0	0	0	0	0	0	0	0	0	0	0	0	0	0	0	0	0	0	0	0	0	34929200	1447500	49135900	0	4003100	0	0	0	0	0	0	0	1817600000	0	720730000	2965400	180270000	1869182610	478536880	0
CLN5	O75503	Ceroid-lipofuscinosis neuronal protein 5	0	0	15533000	0	0	5298600	16167300	0	10285400	0	0	7137800	0	0	30409700	0	19647600	0	10148000	0	0	0	0	0	0	0	0	0	0	0	0	0	0	0	0	0	19329200	49360700	35504100	1899700	36613300	21306800	50977000	7748900	21980800	51612700	0
CLNS1A	P54105	Methylosome subunit pICln	0	0	0	0	0	0	0	0	0	0	0	0	0	0	0	0	0	0	0	0	0	0	0	0	0	0	0	0	0	0	0	0	0	0	0	0	0	0	0	9213900	0	0	0	0	31021000	79387200	0
CLSTN1	O94985;O94985-2	Calsyntenin-1	7311946000	2264561900	2808281900	6553493000	4594065700	2708079000	5209873000	2266650000	1587099000	937421800	132577000	3010093200	1624530700	1023650100	5824984000	2876450600	5566584100	2674118000	2250340000	9511791600	4788046200	2357856900	11395971000	5713302700	6106269000	7825516800	3447072400	1405009800	2051890200	331441200	2889531000	5844214000	5104331100	2755625900	6343384700	3918186700	123924750400	56805929000	49640888840	72638624180	66292446320	55692182470	113392549360	67721416880	41039677200	26101431400	4742369800
CLSTN2	Q9H4D0	Calsyntenin-2	16116000	0	0	0	2386100	1765600	8145800	0	0	0	0	3302400	0	0	3698500	0	7151000	10357000	0	22765100	12696100	6391100	22025900	13413700	2744100	11577200	4414550	0	0	0	1476000	14394200	2689900	2349700	9206300	6175000	466280000	458355700	299237900	131337600	393491200	93556370	231036900	132988900	171794800	18627780	0
CLSTN3	Q9BQT9;Q9BQT9-2	Calsyntenin-3	322198300	77938000	86876000	35465700	88951300	74785700	194196600	87350400	32063000	16327000	4035000	211261400	39703700	46354500	163385800	50743100	232951600	109891100	108490000	13115130	16230200	9010800	42730000	21826100	17500700	23996400	21993000	10583300	0	637650	5428500	52334000	10470100	2934900	17996300	20405000	1506804000	634336000	827304400	264021600	1020155300	477624500	981586900	801208000	476886400	156119940	0
CLTA	P09496;P09496-2;P09496-3;P09496-4;P09496-5	Clathrin light chain A	0	0	0	0	0	0	0	0	0	14696100	0	0	0	0	0	0	0	0	0	0	0	0	0	0	0	0	0	20671600	72039900	57066000	0	7003300	0	0	0	0	10772000	0	0	472230	0	12400100	0	10944000	16742500	447104000	0
CLTB	P09497;P09497-2	Clathrin light chain B	0	0	0	0	0	0	0	0	0	15777400	0	0	0	0	0	0	0	0	0	0	0	1901600	0	0	0	0	0	86835400	80650300	61357500	2454390	2263300	3125600	5381100	0	0	0	0	232260	3959160	0	12857060	1746200	0	7326800	244759000	0
CLTC	Q00610;Q00610-2	Clathrin heavy chain 1	0	0	0	0	0	6266100	0	0	0	17482900	21428800	0	0	21010700	0	0	0	0	0	2596200	63602200	64210300	2187500	0	404758010	0	0	4426628500	912958800	4852169100	101804200	926581600	169767300	125818200	2620870	904240	10644400	10579200	80187900	375952900	121119010	1388125940	214811600	1006200	1064118900	1547177400	0
CLTRN	Q9HBJ8	Collectrin	0	0	0	0	0	0	0	0	0	0	0	0	0	0	0	0	0	0	0	0	28237000	31740600	0	17723000	0	0	16701000	12646000	0	0	4913900	16710000	12288000	2946700	5056300	12098000	0	0	0	0	0	0	0	0	0	0	0
CLU	P10909;P10909-2;P10909-3;P10909-4;P10909-5;P10909-6	Clusterin	46051137450	51007471800	45062069000	55867336300	53003230200	47304958000	72191097000	47787475000	40229224800	5457282100	7919143800	51362868900	29387147300	11669839000	69396252600	49527032000	78163091600	48309005200	58249002240	200564317100	225067717700	109820425640	270782529100	159712109400	272549149300	211497041200	141341858150	72851306010	9787672900	28867020330	66899990250	244149098600	123539086830	61636241220	181422151600	187726328900	687577140000	640167397200	504087499800	791585770700	501122383500	614312558600	840807011300	736070429300	469226394900	73849637730	40747585890
CLUL1	Q15846	Clusterin-like protein 1	0	0	0	0	0	0	0	0	0	0	0	0	0	0	0	0	0	0	0	0	0	0	0	0	0	0	0	0	0	0	0	0	0	0	0	0	429850000	174483100	231325300	988238000	245122600	334616400	734525000	86394300	274928200	7266600	0
CMPK1	P30085;P30085-2;P30085-3	UMP-CMP kinase	0	0	0	0	0	0	0	0	0	0	0	0	0	0	0	0	0	0	0	0	0	1359000	0	0	9901000	0	0	68892000	14193000	30374800	0	11566100	0	4002200	0	0	0	0	1620050	0	1219300	14525280	279220	0	83285500	117953900	0
CNBP	P62633;P62633-2;P62633-3;P62633-4;P62633-5;P62633-6;P62633-7;P62633-8	CCHC-type zinc finger nucleic acid binding protein	0	0	0	0	0	0	0	0	0	22099200	0	0	0	0	0	0	0	0	0	0	0	0	0	0	0	0	0	0	0	0	0	0	0	0	0	0	6602400	703240	8015100	12943700	11116300	23327000	12114300	3387600	5957000	716304000	0
CNDP1	Q96KN2	Beta-Ala-His dipeptidase	7071879800	4174908100	3826710000	16699466000	5603063000	9006237800	18973706000	4313666000	5089983500	1762597800	1638916500	7939356000	1583489900	3470980000	26812450000	6832120000	31498599000	6189738000	8082626000	8666562700	10796026000	2507004600	19575071000	8098129200	10841377000	14153311900	5242778300	1917775600	1554097540	2330471500	2740935500	13259365000	8091884000	2112315400	13766496800	7099946400	26254758000	32988390000	15300405000	17957005000	29124399000	20514805000	16705659000	11940757000	32546307000	28444861000	3504662600
CNDP2	Q96KP4;Q96KP4-2	Cytosolic non-specific dipeptidase	0	0	0	0	4973500	43620800	0	0	0	232059200	39915600	0	0	88662100	0	0	0	0	0	0	32108900	122238400	4229000	14160200	160615000	0	10266300	1000779900	572834900	873335900	94699500	407131200	177742000	287610300	0	0	404240	1838940	36444500	6509600	131059800	75360780	7245800	10471760	47448870	3059116800	0
CNN2	Q99439;Q99439-2	Calponin-2	0	0	0	0	0	0	0	0	0	0	0	0	0	0	0	0	0	0	0	0	0	0	0	0	0	0	0	0	0	0	0	0	0	0	0	0	0	0	0	0	0	0	0	0	0	2509700	0
CNP	P09543;P09543-2	2`,3`-cyclic-nucleotide 3`-phosphodiesterase	0	0	0	0	0	0	0	0	0	0	15707200	0	0	17615400	0	0	0	0	0	323391000	6771120300	55822500	226042200	86736000	2935924800	80161000	218547500	106184193200	3156733500	130999732300	2887504700	25828896550	1803208680	707533200	73359420	0	6136970	29704400	9782810	84610700	3924760	286780700	10074200	7128800	601261500	73491200	0
CNPY3	Q9BT09	Protein canopy homolog 3	0	0	0	0	0	0	0	0	0	0	0	0	0	0	0	0	0	0	0	0	0	0	0	0	0	0	0	0	0	0	0	0	0	0	0	0	64516000	42998000	33871940	47345900	42757900	77818000	80271300	55653900	29263300	12263700	0
CNRIP1	Q96F85;Q96F85-2	CB1 cannabinoid receptor-interacting protein 1	0	0	0	0	0	0	0	0	0	0	0	0	0	0	0	0	0	0	0	0	0	0	0	0	22100000	0	0	151916000	10702400	81639000	0	40879000	0	0	0	0	0	0	0	0	0	4538800	0	0	45748000	3460300	0
CNTFR	P26992	Ciliary neurotrophic factor receptor subunit alpha	59493000	4879100	72734800	312789000	88831000	17095000	466409000	54509400	11987800	12744400	6468700	143262600	38500000	10794000	145814000	106240700	327448000	55947400	98194000	250228200	154225400	11927400	253122000	132954400	273191000	295844000	38016600	46730900	0	36885300	36122900	204598000	46552700	27486400	128514700	93964000	107633700	168779800	88414300	46114900	256603800	46349800	134090000	107589000	102735500	155016000	0
CNTN1	Q12860;Q12860-2;Q12860-3	Contactin-1	5157960000	2183948900	2538572900	6132901700	2004909100	3543486700	4449502000	2474356000	1892068900	389026500	376740900	3807054300	891604300	661653100	5580075100	3080474300	8754503300	2528165400	3504190500	4869146600	3096121100	1224816400	8321527960	2724252300	6494548000	5320827600	2552586600	1960248500	776839900	1373527900	1588372500	4981417200	2361465700	1300407700	4421419800	3494613900	6989602100	7668204900	4350776400	2782088730	9448506200	2353127900	4836920500	5075447000	7176096800	6673565100	1433410600
CNTN2	Q02246	Contactin-2	1384008000	717625700	566902000	985838000	962302200	453337200	1459851200	389907700	184145900	158165900	300227100	765354600	159703500	558160400	960765900	484192800	1879162000	673748100	817084000	1947819000	874309600	392817500	2137032000	1110057200	1278380100	1948440000	402202200	184364500	72507300	563984700	244877300	1599477500	538300500	545555400	1655275300	1140750200	1375443300	2150067000	1928050200	673465000	4802819000	341496900	1512044100	615116800	967968400	2267962000	299312000
CNTN3	Q9P232	Contactin-3	24710300	0	0	5052800	8716100	6377200	6873500	0	0	0	0	1712200	0	0	11146600	0	7871400	3071800	0	0	0	0	0	0	0	0	0	0	0	0	0	0	0	0	0	0	1141000	9947270	2229900	1273100	12794700	0	5242090	1102900	1877100	17423200	0
CNTN4	Q8IWV2;Q8IWV2-2;Q8IWV2-3;Q8IWV2-4	Contactin-4	21800600	3114600	0	22215111	5498796	4638034	37197362	8895555	2606294	0	0	4684300	2457100	2280100	18130543	3239100	35029520	10144150	13872430	35956673	5537200	0	38012000	8057400	14535900	32225732	0	0	0	0	6217000	7427100	11660802	0	18305319	4310900	59014567	39036822	9734531	17641940	73162052	6738400	26589288	7464040	6444967	31952424	0
CNTN5	O94779;O94779-2;O94779-4	Contactin-5	0	0	0	0	0	0	0	0	0	0	0	0	0	0	0	0	0	0	0	0	0	0	0	0	0	0	0	0	0	0	0	0	0	0	0	0	6006300	2512800	0	0	1728900	0	0	0	0	3821300	0
CNTN6	Q9UQ52	Contactin-6	15726600	0	0	13231389	16280604	20238866	20625138	2059845	5207506	0	0	0	2457100	2280100	19427357	3239100	50218180	4513650	1221570	73194627	62248000	0	0	9799200	49354000	37500468	16120000	21130000	0	0	6217000	0	5371698	0	33175981	11966200	389242333	160376678	90303789	34014660	304187848	127818000	252624612	125354360	94902033	75008576	0
CNTNAP1	P78357	Contactin-associated protein 1	0	0	0	0	0	0	0	0	0	0	0	0	0	0	0	0	0	0	0	0	0	0	0	0	0	0	0	209017200	8776000	142459900	0	23907500	0	0	0	0	0	0	0	0	0	0	0	0	0	0	0
CNTNAP2	Q9UHC6	Contactin-associated protein-like 2	98520400	13656100	0	41073400	0	6156200	203407300	0	0	0	0	0	0	1565400	92880500	6029200	183852200	16019200	8521900	54911700	6197400	1719300	51103200	0	47212500	43947000	1457800	13169000	6614500	13491800	860420	14319400	7472700	1049400	58187800	3017900	228830300	241127300	53344000	56435300	231755300	31021600	172103900	31785680	51187300	23741450	0
CNTNAP4	Q9C0A0;Q9C0A0-2	Contactin-associated protein-like 4	165387400	78671600	6666100	120460600	79416000	133792800	450330000	28974000	26357500	0	0	22625700	4343100	18246500	245029659	16764000	336336000	76648000	123907500	36482600	22394300	713560	60800000	21184600	44284000	110132100	10622300	0	0	0	4905100	28900900	17345800	0	53802000	26393500	206440900	253755700	33169220	12512340	318274700	60775000	244498100	80318900	138226600	22453610	4396900
CNTNAP5	Q8WYK1	Contactin-associated protein-like 5	0	0	0	0	0	0	0	0	0	0	0	0	0	0	230741	0	16562200	0	0	0	0	0	0	0	0	0	0	0	0	0	0	0	0	0	0	0	21016600	23085200	13677100	9120900	43484800	0	13968000	12191000	21308000	20875000	0
COASY	Q13057;Q13057-2	Bifunctional coenzyme A synthase	0	0	0	0	0	0	0	0	0	0	0	0	0	0	0	0	0	0	0	0	0	0	0	0	0	0	0	0	0	0	0	0	0	0	0	0	0	0	0	0	0	21575000	0	0	54877000	822690	0
COCH	O43405;O43405-2	Cochlin	32534000	0	0	33280000	15688000	46382000	23140000	28249500	24077000	0	0	43168000	17455400	0	30698000	9586000	48418000	10620000	15879000	0	0	0	0	0	0	0	0	0	0	0	0	0	0	0	0	0	1011131400	528539400	221056920	869960100	149934400	404079400	292495200	476465900	553675860	10571700	0
COG5	Q9UP83;Q9UP83-2;Q9UP83-3	Conserved oligomeric Golgi complex subunit 5	0	0	0	0	0	0	0	0	0	0	0	0	0	0	0	0	0	0	0	0	0	0	0	0	0	0	0	0	0	0	0	0	0	0	0	0	55289000	103090000	113370000	56675000	88073000	39208000	94284000	94096000	109192600	96512000	0
COL11A1	P12107;P12107-2;P12107-3;P12107-4	Collagen alpha-1(XI) chain	0	0	0	0	0	0	0	0	0	0	0	0	0	0	0	0	0	0	0	0	0	0	0	0	0	0	0	0	0	0	0	0	0	0	0	0	148539600	92530800	36226270	126597300	121889300	75391900	253440000	55004630	19512400	12069600	0
COL12A1	Q99715;Q99715-2;Q99715-4	Collagen alpha-1(XII) chain	0	0	0	0	0	0	0	0	0	0	0	0	0	0	0	0	0	0	0	0	0	0	0	0	0	0	0	0	0	0	0	0	0	0	0	0	1610735690	2246286400	529067860	2004391230	960651160	1263896220	4669080500	1182284150	390980600	17693740	0
COL14A1	Q05707;Q05707-2;Q05707-3	Collagen alpha-1(XIV) chain	0	0	0	0	0	0	0	0	0	0	0	0	0	0	0	0	0	0	0	0	0	0	0	0	0	0	0	0	0	0	0	0	0	0	0	0	2128515500	2136219100	1126929610	3480219000	1127185320	1349086600	2240542870	1464512000	500979400	83698510	0
COL15A1	P39059	Collagen alpha-1(XV) chain	12591000	0	0	10951000	0	0	8090500	0	0	0	0	4911900	0	0	0	0	0	8289200	0	0	0	0	0	0	0	0	0	0	0	0	0	0	0	0	0	0	235184800	135951100	49598940	248991900	105587000	125385800	363684300	74758500	36723880	13385000	0
COL16A1	Q07092;Q07092-2	Collagen alpha-1(XVI) chain	0	0	0	0	0	0	0	0	0	0	0	0	0	0	0	0	0	0	0	0	0	0	0	0	0	0	0	0	0	0	0	0	0	0	0	0	163016800	171155100	109003300	335157000	101345500	123980400	288238600	135556500	57465300	10011800	0
COL18A1	P39060;P39060-1;P39060-2	Collagen alpha-1(XVIII) chain	453289800	226698400	243836000	325801300	662866000	102363400	292214000	172893000	164001000	155736100	7820300	278609100	139924000	82248000	497718000	462263000	580933100	233397000	272078500	910292000	542556700	205277600	744045000	319895600	730627800	482349700	187022800	177704900	119083400	0	111779400	328975000	221592800	192337000	610947200	434437900	1835160400	1590058500	920066620	1269918900	800465500	882271900	1860180140	1026267400	548857630	469572000	90108900
COL1A1	P02452	Collagen alpha-1(I) chain	654822000	557958000	203519900	313071000	367756500	183421000	2892837700	129235100	90036200	156706400	4925700	443747000	101345000	76853900	629577600	1062191000	1122984000	598574200	1065195000	649050600	3214544200	338811700	942172900	1116785800	1180475400	3252999900	989723700	127260000	99003500	70740300	207356200	807145300	468037400	418540500	943215620	1279379400	11022081000	11617768000	5404678400	6794395000	5604540900	8957627200	17264001000	5075903400	3215510890	1736626910	80104100
COL1A2	P08123	Collagen alpha-2(I) chain	181267400	114090100	109006000	81952300	129161000	86864000	353275000	0	37939200	43708000	34461500	119171800	49455400	11142000	197019200	291712000	466717000	76410100	350580000	698196000	652301000	165937800	326819600	361849300	362280900	365316700	53508000	50463000	34404030	18404000	66463510	170668200	129436500	69935800	201764000	296127000	6177870000	5752798600	3003730000	3656087700	3532283000	4704459960	7763509000	2671867000	1690315000	823762800	0
COL21A1	Q96P44;Q96P44-3	Collagen alpha-1(XXI) chain	0	0	0	0	0	0	0	0	0	0	0	0	0	0	0	0	0	0	0	0	0	0	0	0	0	0	0	0	0	0	0	0	0	0	0	0	10114600	26179900	10114900	4796700	5554950	5836100	4112100	24129900	22270400	0	0
COL26A1	Q96A83;Q96A83-2	Collagen alpha-1(XXVI) chain	0	0	0	0	0	0	0	0	0	0	0	0	0	0	0	0	0	0	0	0	0	0	0	0	0	0	0	0	0	0	0	0	0	0	0	0	12657000	4286900	4483200	15162000	5653600	3521200	28143800	1481000	0	0	0
COL28A1	Q2UY09;Q2UY09-2;Q2UY09-3	Collagen alpha-1(XXVIII) chain	0	0	0	0	0	0	0	0	0	0	0	0	0	0	0	0	0	0	0	0	0	0	0	0	0	0	0	0	0	0	0	0	0	0	0	0	35640100	65766800	36120670	30897200	15188110	37054100	103328300	174489200	28371770	0	0
COL3A1	P02461;P02461-2	Collagen alpha-1(III) chain	77353400	22961900	25635200	58855300	31625300	15623400	301896600	0	0	1226800	0	53747000	21152200	0	94555000	258101000	144000000	46964000	129387000	61153000	147634600	14590900	10639000	96519300	0	232375400	12013600	0	11636100	0	8732500	21090400	30069400	2948810	105434000	113765400	1541207400	1256758000	759188200	436093600	882415400	759593200	3429556000	545776900	301218600	465325900	0
COL4A1	P02462	Collagen alpha-1(IV) chain	0	0	0	0	0	0	0	0	0	0	0	0	0	0	0	0	0	0	0	4121600	9506400	0	11568000	3503100	13603000	2823400	0	0	0	0	0	9097700	6194700	2563800	0	0	137354000	182092200	72299100	125536300	87880900	65433300	130021900	117712700	55042300	85124000	0
COL4A2	P08572	Collagen alpha-2(IV) chain	34489300	0	0	0	13337000	22938900	37338000	0	7842200	9346700	0	17431200	0	0	28986000	12465000	15844000	0	25275000	33785000	27006200	16857000	39282000	12684000	60925000	25118000	10571000	3660900	2960700	0	12520000	15916900	7625500	5111000	0	8342200	405638130	362418680	195006410	244422700	516574110	216382100	431684500	352055500	211896160	173406500	0
COL5A1	P20908;P20908-2	Collagen alpha-1(V) chain	2019300	0	0	0	0	0	91478000	0	0	984090	0	0	0	0	13665100	0	0	0	9512400	0	164627000	0	0	54805000	0	523715000	0	0	0	0	0	0	0	0	47715000	0	72178100	60392370	13887060	63079600	73635940	33131700	744613400	21362400	5325900	2093400	0
COL5A2	P05997	Collagen alpha-2(V) chain	0	0	0	0	0	0	64258000	0	0	0	0	0	0	0	0	0	0	0	0	0	0	0	0	0	0	0	0	0	0	0	0	0	0	0	0	0	114961300	65301700	37436100	53332000	133800790	37037000	666358000	20545400	10083800	0	0
COL5A3	P25940	Collagen alpha-3(V) chain	0	0	0	0	0	0	0	0	0	0	0	0	0	0	0	0	0	0	0	0	0	0	0	0	0	0	0	0	0	0	0	0	0	0	0	0	3051100	2379100	0	7677300	4533300	0	225827300	3230800	0	2085300	0
COL6A1	P12109	Collagen alpha-1(VI) chain	520895200	355080800	356099800	885827500	280337700	981171200	1771999900	447519000	375687000	20503100	27485330	811015700	226381100	78314000	1201350800	279613000	1774124300	396631200	495923600	1117303900	1385741700	374212110	1601321000	704155700	2694483800	2026269300	557862600	218070600	42682180	74605700	259096800	1300068800	715193000	157574300	1034894600	623665700	5576202000	7355717470	2880400770	4869059940	7713146200	3277156400	7799994200	5599992900	3769585600	1283752980	187197800
COL6A2	P12110;P12110-2;P12110-3	Collagen alpha-2(VI) chain	0	0	0	0	0	0	0	0	0	0	0	0	0	0	0	0	0	0	0	15395600	14922600	3243800	0	0	0	32199800	2957400	2224000	0	0	4142000	10832000	14829300	5087300	8849400	2308200	1158066240	911085780	596349800	2499618800	656258560	938176000	2035910300	1277046800	419262500	133218000	0
COL6A3	P12111;P12111-2;P12111-3;P12111-4;P12111-5	Collagen alpha-3(VI) chain	149202400	25272200	45568100	225707000	54253700	174738100	533148500	44528300	12810700	62934500	0	93737800	40153200	9333500	189004800	228438000	283832900	71870500	95807300	313362800	918100700	122779500	770059800	249240200	411271900	1108180900	110326000	92585900	57389600	0	117555200	234761600	196574800	174753000	268814600	324618500	10591285840	8420872130	6118832940	19589733300	6397359480	9382457100	18979463190	9645823500	4631241460	2149011600	9333300
COLEC11	Q9BWP8;Q9BWP8-10;Q9BWP8-2;Q9BWP8-3;Q9BWP8-4;Q9BWP8-5;Q9BWP8-6;Q9BWP8-7;Q9BWP8-8;Q9BWP8-9	Collectin-11	0	0	0	0	0	0	0	0	0	0	0	0	0	0	0	0	0	0	0	0	0	0	0	0	0	0	0	0	0	0	0	0	0	0	0	0	33708000	15007600	25485000	1106800	20093500	10851900	40629000	9930100	31802000	10470000	0
COLEC12	Q5KU26	Collectin-12	86654400	18277000	19554000	119283000	8026200	58769000	94945000	18932900	9286600	17195500	3429600	27840000	22959100	29784000	77999200	43020000	134625800	50380400	52807300	47487500	24103800	4422200	121353000	30916000	65535000	78726000	14834400	0	3293900	0	3437100	20822000	24735400	5097800	52260000	63297500	605533300	885674900	510628800	316273000	737375400	358071000	1028062300	408695900	362242300	579313000	6696800
COMP	P49747;P49747-2	Cartilage oligomeric matrix protein	133204708	36108548	9529551	2082600	146273094	0	52341277	28763014	4824900	3638000	0	13025118	12402126	0	91137613	12895484	877535	187293788	17861500	97930744	115907529	17269004	35180284	78248249	82359097	92671451	29921193	1187774	0	0	6836086	32247423	45566402	5430100	3767058	45363874	2213904826	630278413	185022899	56714515	2228059493	428274904	743770993	719542782	222124639	106539446	0
COMT	P21964;P21964-2	Catechol O-methyltransferase	0	0	0	0	0	0	0	0	0	0	0	0	0	0	0	0	0	0	0	0	0	0	0	0	17643000	120230000	0	176364000	0	135889000	0	0	0	0	0	0	0	0	0	0	0	0	0	0	46653800	0	0
COPA	P53621;P53621-2	Coatomer subunit alpha	0	0	0	0	0	0	0	0	0	0	0	0	0	0	0	0	0	0	0	0	0	0	0	0	0	0	0	0	0	0	0	0	0	0	0	0	0	0	1025300	0	0	933710	0	0	20714500	30028780	0
COPB1	P53618	Coatomer subunit beta	0	0	0	0	0	0	0	0	0	0	0	0	0	0	0	0	0	0	0	0	0	0	0	0	0	0	0	0	0	0	0	0	0	0	0	0	0	0	0	0	0	0	0	0	4909500	14531800	0
COPB2	P35606;P35606-2	Coatomer subunit beta`	0	0	0	0	0	0	0	0	0	0	0	0	0	0	0	0	0	0	0	0	0	0	0	0	0	0	0	0	0	0	0	0	0	0	0	0	0	0	0	0	0	0	2812000	0	1769700	23631500	0
COPE	O14579;O14579-2	Coatomer subunit epsilon	0	0	0	0	0	0	0	0	0	0	0	0	0	0	0	0	0	0	0	0	0	0	0	0	0	0	0	0	0	0	0	0	0	0	0	0	0	0	0	0	0	0	0	0	0	60903000	0
COPG1	Q9Y678	Coatomer subunit gamma-1	0	0	0	0	0	0	0	0	0	0	0	0	0	0	0	0	0	0	0	0	0	0	0	0	0	0	0	0	0	0	0	0	0	0	0	0	0	0	0	0	0	4701820	0	0	11181400	14319000	0
COPS2	P61201;P61201-2	COP9 signalosome complex subunit 2	0	0	0	0	0	0	0	0	0	0	0	0	0	0	0	0	0	0	0	0	0	0	0	0	0	0	0	0	0	0	0	0	0	0	0	0	0	0	2845500	16558800	3667860	152578000	1078800	0	158067000	65653600	0
COPS3	Q9UNS2;Q9UNS2-2	COP9 signalosome complex subunit 3	0	0	0	0	0	0	0	0	0	0	0	0	0	0	0	0	0	0	0	0	0	0	0	0	0	0	0	0	0	0	0	0	0	0	0	0	0	0	0	16319300	1696900	62829060	981220	628020	77731400	35952150	0
COPS4	Q9BT78;Q9BT78-2	COP9 signalosome complex subunit 4	0	0	0	0	0	0	0	0	0	0	0	0	0	0	0	0	0	0	0	0	0	0	0	0	0	0	0	0	0	0	0	0	0	0	0	0	0	0	1286800	50121800	1568950	190467000	2419700	0	207302300	113866300	0
COPS5	Q92905	COP9 signalosome complex subunit 5	0	0	0	0	0	0	0	0	0	0	0	0	0	0	0	0	0	0	0	0	0	0	0	0	0	0	0	0	0	0	0	0	0	0	0	0	0	2312500	1215550	11011720	3468970	112422400	2433890	495280	138558200	42162200	0
COPS6	Q7L5N1	COP9 signalosome complex subunit 6	0	0	0	0	0	0	0	0	0	0	0	0	0	0	0	0	0	0	0	0	0	0	0	0	0	0	0	0	0	0	0	0	0	0	0	0	0	0	0	10282360	766000	77235100	871930	0	146966900	38892000	0
COPS7A	Q9UBW8	COP9 signalosome complex subunit 7a	0	0	0	0	0	0	0	0	0	0	0	0	0	0	0	0	0	0	0	0	0	0	0	0	0	0	0	0	0	0	0	0	0	0	0	0	0	0	675180	7448820	578630	47104400	0	0	42076000	22011000	0
COPS8	Q99627;Q99627-2	COP9 signalosome complex subunit 8	0	0	0	0	0	0	0	0	0	0	0	0	0	0	0	0	0	0	0	0	0	0	0	0	0	0	0	0	0	0	0	0	0	0	0	0	0	0	0	8678300	0	29065500	0	0	28368000	4191000	0
CORO1A	P31146	Coronin-1A	0	0	0	3193400	21202200	13220000	7534100	0	3664900	109079600	22061700	0	14744200	0	3672700	100624800	0	0	0	14877900	45050000	181626100	80659000	74156400	114934000	52607500	16514600	195575200	476771600	296554000	13861000	120362400	73414500	408949000	0	36727900	120204000	127913900	541359700	401085600	1167185400	1012918790	640127600	225568500	746842000	4699518600	2390800
CORO1B	Q9BR76	Coronin-1B	0	0	0	0	0	0	0	0	0	0	0	0	0	0	0	0	0	0	0	0	0	0	0	0	0	0	0	0	0	0	0	0	0	0	0	0	9541800	1896010	22031200	16229400	31620700	30413500	17461850	10003600	17196700	13263000	0
CORO1C	Q9ULV4;Q9ULV4-2;Q9ULV4-3	Coronin-1C	0	0	0	0	0	0	0	0	0	0	0	0	0	0	0	0	0	0	0	0	0	0	0	0	0	0	0	0	0	0	0	0	0	0	0	0	8565090	11109600	54374200	58505700	112760000	66904800	38720300	12413150	57391000	0	0
CORO7	P57737;P57737-2;P57737-3;P57737-4	Coronin-7	0	0	0	0	0	0	0	0	0	0	0	0	0	0	0	0	0	0	0	0	0	0	0	0	0	0	0	0	0	0	0	0	0	0	0	0	0	0	1762060	0	4115460	7416400	0	0	9726600	5780340	0
COTL1	Q14019	Coactosin-like protein	15562700	4310700	64004900	24100200	53939200	83060700	22902800	9860800	14479300	123168700	14812500	21457400	14023400	51848800	80878100	50577700	17405500	47202900	9270700	39497000	78579000	219400400	68061100	67163000	158320000	90532400	60634200	165875400	359775100	171437000	12183800	245363800	101801800	57979600	8721900	49085400	6860600	10042910	27887020	1950680	59143700	26756300	17467400	17124300	29277980	729624000	8820900
COX4I1	P13073	Cytochrome c oxidase subunit 4 isoform 1, mitochondrial	0	0	0	0	0	0	0	0	0	0	0	0	0	0	0	0	0	0	0	2065800	0	0	0	0	117779000	0	2674700	445722600	41322800	466759000	16108700	152968000	32302000	28213000	0	0	0	0	0	0	0	0	0	0	0	0	0
COX5A	P20674	Cytochrome c oxidase subunit 5A, mitochondrial	0	0	0	0	0	0	0	0	0	0	0	0	0	0	0	0	0	0	0	0	42094200	0	0	0	487650000	0	0	1704050000	197018100	2013077000	68356600	621009000	118435900	67014900	0	0	28874000	3474800	2080100	29141000	2624700	9423800	22918000	6429000	3794700	28785000	0
COX5B	P10606	Cytochrome c oxidase subunit 5B, mitochondrial	0	0	0	0	0	0	0	0	0	0	0	0	0	0	0	0	0	0	0	0	0	0	0	0	27742700	0	0	516059000	88749300	462910000	16410200	143646000	6446200	22910700	0	0	0	0	0	0	0	0	0	0	0	128285000	0
COX6B1	P14854	Cytochrome c oxidase subunit 6B1	0	0	0	0	0	0	0	0	0	31720600	0	0	0	0	0	0	0	0	0	0	7891400	0	0	0	42693000	0	0	170771400	32455500	190082000	0	136638800	0	2588800	0	0	0	0	0	12188000	0	5033000	0	0	0	127905300	0
COX6C	P09669	Cytochrome c oxidase subunit 6C	0	0	0	0	0	0	0	0	0	0	0	0	0	0	0	0	0	0	0	0	0	0	0	0	29885000	0	0	158508000	25771000	143082000	2577500	27301000	10163600	9974000	0	0	0	0	0	0	0	0	0	0	0	0	0
COX7A2	P14406	Cytochrome c oxidase subunit 7A2, mitochondrial	0	0	0	0	0	0	0	0	0	0	0	0	0	0	0	0	0	0	0	0	13533000	0	0	0	137212000	0	0	565790000	58783000	415050000	26212900	204016000	43727000	34671900	0	0	0	0	0	0	0	0	0	0	0	0	0
COX7C	P15954	Cytochrome c oxidase subunit 7C, mitochondrial	0	0	0	0	0	0	0	0	0	0	0	0	0	0	0	0	0	0	0	137630000	0	0	0	0	13851000	90593000	0	221678000	7890400	58925000	0	146606000	41585100	0	34930000	38735000	0	0	0	0	0	0	0	0	0	0	0
CP	P00450	Ceruloplasmin	7919733800	12168808000	24782773000	23569498000	12289178600	6722002800	19705406000	22517658500	10542782800	6654300800	10896131100	32096687700	15112710200	11364025700	28213747000	13317038000	22621515000	13868462100	31791968800	9248038600	13309111800	10939144200	27834848020	25270927000	22231393200	19740862000	9376263900	3502032300	2551574000	6196556900	7944841500	16719745000	13643666050	6675089700	11814944000	22293862400	28499534900	31845435800	50906167600	19928409300	39651987200	22737400330	43984524500	39970957000	27329813900	27059965400	2551957900
CPA4	Q9UI42;Q9UI42-2	Carboxypeptidase A4	0	0	0	0	0	0	0	0	0	0	0	0	0	0	0	0	0	0	0	0	0	0	0	0	2389000	0	251074000	0	799060	0	1785700	0	0	0	0	0	0	0	0	0	0	0	0	0	0	0	0
CPAMD8	Q8IZJ3;Q8IZJ3-2	C3 and PZP-like alpha-2-macroglobulin domain-containing protein 8	0	0	0	0	0	0	0	0	0	0	0	0	0	0	0	0	0	0	0	0	0	0	0	0	0	0	0	0	0	0	0	0	0	0	0	0	88359300	177470100	125561800	21765380	122630100	50253870	106903100	253872200	49186860	0	0
CPB2	Q96IY4;Q96IY4-2	Carboxypeptidase B2	58054000	54601000	391034700	35406000	65264000	67786900	93792900	143025300	84611000	12731000	24673800	140378600	90767100	23393000	161825200	259949600	146927000	69603000	151717600	14597700	73623400	21957000	9220300	51330300	4719100	41748900	5219400	3198300	4207200	0	5218400	63020900	4240900	29867100	32868200	37180100	144319500	351566980	817152000	325786100	481715800	322211300	405590200	330818100	458848500	500235400	0
CPD	O75976;O75976-2	Carboxypeptidase D	0	0	0	0	0	0	0	0	0	0	0	0	0	0	0	0	0	0	0	0	0	0	0	0	0	0	0	0	0	0	0	0	0	0	0	0	342665600	194090900	103789300	196065600	148883100	240057100	280952800	146852600	31944720	5312800	0
CPE	P16870;P16870-2	Carboxypeptidase E	2211933000	1264753500	2135555000	674539000	2302339000	1197111400	2335070000	1668042100	1307650200	44682000	57046800	1098870000	686456000	866329800	2079860000	838738000	2776137000	3134300200	1007858000	4887217000	5535003000	3602254000	2230035300	4136949900	4005651900	4548157200	3322123700	1482020500	154542300	219755000	1697594800	2887748000	2972109000	777104600	4469992900	3174134000	21260833500	21897932020	24914053510	13584539100	23794762410	13772150900	25943221000	25234271700	16191121190	1652428410	1650415000
CPLX2	Q6PUV4	Complexin-2	0	0	0	0	0	0	0	0	0	0	0	0	0	0	0	0	0	0	0	0	0	0	0	0	3419000	0	0	1898700	13701800	5193000	0	0	0	0	0	0	22692000	7526600	6620600	26387000	13154000	15260000	38155000	17238000	9257600	19603600	0
CPM	P14384	Carboxypeptidase M	0	0	0	0	0	0	0	0	0	0	0	0	0	0	0	0	0	0	0	0	0	0	0	0	0	0	0	0	0	0	0	0	0	0	0	0	104030000	10012500	17973500	27962200	31494000	69600900	16401800	31198500	35127400	712109250	0
CPN1	P15169	Carboxypeptidase N catalytic chain	0	0	17702400	0	0	13678000	63362000	89299000	7466100	0	28995400	14405300	43995500	0	15517000	0	5295300	0	19564400	4179400	67139690	14699800	67707600	295040300	28681000	91689900	52085900	1511900	0	76714000	43062500	65758100	23566000	36842600	16535000	48766000	65518800	342393700	266285600	480094890	128610460	177352600	402408500	802659100	268402000	45253450	0
CPN2	P22792	Carboxypeptidase N subunit 2	4387000	0	52653900	31896000	0	30892000	125716000	178884000	17803800	0	47505300	68056000	145491200	0	57735100	7088800	47550500	29275700	75182000	0	103217700	12815100	210128000	357010700	119311000	173284300	23929300	3707900	0	217867700	11417700	4591700	13088500	45660800	6581900	83397400	123203400	834208800	1252061000	59283300	695240000	145765300	434766700	1795694000	505151400	29968700	0
CPNE2	Q96FN4;Q96FN4-2	Copine-2	0	0	0	0	0	0	0	0	0	0	0	0	0	0	0	0	0	0	0	0	4323100	2414809	0	788250	5244837	0	2684468	38526940	1111390	15677210	1482712	7380553	1354500	2311531	0	0	0	0	0	0	0	0	0	0	0	0	0
CPNE3	O75131	Copine-3	0	0	0	0	0	0	0	0	0	0	0	0	0	0	0	0	0	0	0	0	4323100	22061791	0	788250	23558163	0	6792732	149474860	82961910	55161290	4965288	20091347	20760600	12769069	0	0	2780600	13353110	63097100	1792200	9840400	5367700	23128000	1450600	56547300	129103000	0
CPPED1	Q9BRF8;Q9BRF8-2;Q9BRF8-3	Serine/threonine-protein phosphatase CPPED1	0	0	0	0	0	0	0	0	0	0	11791800	0	0	0	0	0	0	0	0	0	0	0	0	0	0	0	0	65348000	2735100	115955000	0	7142500	0	0	0	0	0	0	0	0	0	0	0	0	0	36279300	0
CPQ	Q9Y646	Carboxypeptidase Q	67414200	146418800	62076000	42921500	21916000	81040000	300300400	41958400	46578000	0	0	53898400	7052600	30206900	190176800	27975800	315906500	51727500	105328000	55214000	122514700	37497000	105465000	48613000	97188000	159470000	47974000	22274900	0	3632100	13791100	65411300	40145600	7253900	193445400	70160800	1499208700	1122548700	579061000	935370000	417612000	772612000	1608471000	666138000	294722300	110265180	10939000
CPS1	P31327;P31327-2;P31327-3	Carbamoyl-phosphate synthase [ammonia], mitochondrial	0	0	0	0	0	0	0	0	0	0	0	0	0	0	0	0	0	0	0	0	0	0	0	0	0	0	0	0	0	0	0	0	0	0	0	0	2426700	7021200	1801800	9254600	0	0	5137100	0	90834000	371513	0
CPSF6	Q16630;Q16630-2;Q16630-3	Cleavage and polyadenylation specificity factor subunit 6	0	0	0	0	0	0	0	0	0	0	0	0	0	0	0	0	0	0	0	0	0	0	0	0	0	0	0	0	0	0	0	0	0	0	0	0	0	0	0	2054900	1373100	3437900	1546000	0	5934510	145584000	0
CPVL	Q9H3G5	Probable serine carboxypeptidase CPVL	80507200	59188000	35949000	10172000	30043400	78072800	15798000	34997800	39987800	50917100	14675300	73409000	13418000	12214000	97919100	19808300	33106000	115130000	148900000	192290000	238170500	153997000	112555000	225777200	249466400	145793900	121071500	34740200	77682700	61767600	66508600	148664700	185960000	72946000	61530800	251046100	691846210	1866705300	1147104000	991564200	569853800	923753770	985864600	1307831500	738702600	1115373770	18275000
CPXM1	Q96SM3	Probable carboxypeptidase X1	0	0	0	0	0	0	0	0	0	0	0	0	0	0	0	0	0	0	0	0	0	0	0	0	0	0	0	0	0	0	0	0	0	0	0	0	297208700	437361200	230887700	369354400	163576700	346762400	176989200	291370100	64119970	3471200	0
CPXM2	Q8N436	Inactive carboxypeptidase-like protein X2	0	0	0	0	0	0	0	0	0	0	0	0	0	0	0	0	0	0	0	13261687	8490705	7634962	0	5946700	6735747	1963311	4294199	8453000	0	1494451	407447	18285481	3659300	0	1184700	6270116	1685661799	1966675764	2206516866	819429458	1136962042	807009555	1312547055	1300755445	1322404707	110810884	0
CR1	P17927	Complement receptor type 1	0	0	0	0	0	0	0	0	0	0	0	0	0	0	0	0	0	0	0	0	0	0	0	0	7438400	0	0	17833300	0	35919000	0	0	0	0	0	0	674400	2353100	1111700	1136100	0	21325200	0	1668300	0	0	0
CRABP1	P29762	Cellular retinoic acid-binding protein 1	0	0	0	0	0	0	0	0	0	0	0	0	0	0	0	0	0	0	0	20133600	53749000	0	44406400	35392900	45156000	3950000	8332900	0	0	4827700	6241000	22768400	3479600	11190400	14150600	23196700	11295500	28270200	31825200	59613100	26911300	22732800	20364400	24071400	2927000	0	0
CRB2	Q5IJ48;Q5IJ48-2;Q5IJ48-3	Protein crumbs homolog 2	0	0	0	0	0	0	0	0	0	0	0	0	0	0	0	0	0	0	0	0	69456900	92425800	18066500	8818500	0	405700	36501100	132844500	0	7555700	13520000	61382100	40242100	15682200	6407100	0	30426500	23042400	38910400	512980	48801000	4031000	21023980	21270700	21912000	9479500	0
CRELD1	Q96HD1;Q96HD1-2	Protein disulfide isomerase CRELD1	17478300	0	0	8091400	0	0	5792100	0	10163300	0	0	149220000	791020	0	4401900	7636400	21876300	4175700	0	18804000	4510800	0	21295000	0	12752000	9182800	4245500	0	0	0	31424600	10141000	0	0	10871000	4399800	187068600	63268800	53953900	61591000	80885600	30180200	119839200	61039700	91760600	16731000	0
CRIM1	Q9NZV1	Cysteine-rich motor neuron 1 protein	0	0	0	0	0	0	0	0	0	0	0	0	0	0	0	0	0	0	0	0	0	0	0	0	0	0	0	0	0	0	0	0	0	0	0	0	22441600	1932200	1318000	0	2046300	8249900	24715200	3061100	0	1535600	0
CRIP1	P50238	Cysteine-rich protein 1	28408000	0	0	10731000	0	0	0	0	0	0	0	0	0	0	19563900	24157000	0	0	0	0	0	0	0	0	0	0	0	0	0	0	0	0	0	0	0	0	73036000	11752000	10526700	29674300	0	25059600	29257000	20426300	1213200	10848000	0
CRIP2	P52943;P52943-2	Cysteine-rich protein 2	21855000	0	0	0	3979500	0	0	0	0	24765000	6680700	0	0	35072000	0	0	0	0	0	21008000	53538000	74397000	40684000	79670000	7609600	31913000	103810000	160273400	14798200	58547000	21083000	295216900	152539000	36314000	3631300	37966000	322952000	128882400	175545000	160474000	66946500	144243600	196596900	212907100	81673700	501262000	0
CRISP3	P54108;P54108-2;P54108-3	Cysteine-rich secretory protein 3	0	0	5829100	0	0	0	0	0	0	0	0	0	9921700	21093000	0	0	0	0	0	0	0	0	0	0	0	0	0	0	0	0	0	0	0	0	0	0	0	0	0	0	0	0	0	0	0	0	0
CRK	P46108;P46108-2	Adapter molecule crk	0	0	0	0	0	0	0	0	0	0	0	0	0	0	0	0	0	0	0	0	0	0	0	0	0	0	0	36214200	3328100	18568000	0	3122600	0	0	0	0	0	0	676750	0	942130	0	0	0	0	21150000	0
CRKL	P46109	Crk-like protein	0	0	0	0	0	0	0	0	0	0	0	0	0	0	0	0	0	0	0	0	1850200	0	0	0	0	0	0	21050300	6558900	8470800	0	3525900	0	0	0	0	0	0	0	0	6727200	8505090	0	0	32604700	133152000	0
CRLF1	O75462	Cytokine receptor-like factor 1	0	0	0	0	0	0	0	0	0	0	0	0	0	0	0	0	0	0	0	0	0	0	0	0	0	0	0	0	0	0	0	0	0	0	0	0	22740700	24044800	45657400	12549100	10523000	9081100	6717200	24234100	27503500	0	0
CRMP1	Q14194;Q14194-2	Dihydropyrimidinase-related protein 1	0	0	0	0	0	20618338	0	0	2517086	0	18102921	2476756	0	19345396	0	0	0	0	0	386236	7359741	3094074	1976070	4516659	44020694	0	0	326649836	74392511	417066873	10391243	122214619	18348663	29230142	0	0	2900263	550569	8676779	131622255	12606087	622876297	3604817	4119953	129461286	61133390	0
CRNN	Q9UBG3	Cornulin	0	0	0	0	0	0	0	0	0	0	0	0	0	0	0	0	0	0	0	0	0	0	0	0	0	0	0	0	0	0	0	0	0	0	0	0	0	0	0	0	0	0	0	0	0	0	0
CRP	P02741;P02741-2	C-reactive protein	0	0	0	0	0	0	0	0	0	0	0	0	0	0	0	0	0	0	0	0	131834100	0	0	0	142325000	313406000	99159400	0	2832500	37117100	4896300	4583300	17737200	0	1935400	0	2620700	14827000	43791200	24039000	65455200	130630000	767235000	446354000	50718000	481828000	0
CRTAC1	Q9NQ79;Q9NQ79-2;Q9NQ79-3	Cartilage acidic protein 1	2347388500	835559400	540594400	2522714000	874289600	732870000	1981057000	726587100	301752000	318434500	21903700	865409400	227891000	268706800	1643558000	1116873000	2548117000	768792000	685344900	1506272000	746687500	246788200	3514570000	778023500	1146711800	1846201000	313391800	109769900	202461500	33345900	271096500	1274952000	551182500	399614800	977627000	515619900	14147576300	7393208400	5540869000	20641513100	8124580000	4869218400	20571590000	6823622800	3563377600	4570939300	706001600
CRYAB	P02511	Alpha-crystallin B chain	0	0	0	0	0	0	0	0	0	0	87524000	0	0	138809000	0	0	0	0	0	9132500	62002000	67294000	15678700	10225000	186671600	4887200	37686900	5020870000	162210700	7377019000	181619050	2166436700	167400400	116945200	1166800	6172200	229430	217200	5424250	31661320	2080700	36085610	6846460	9620320	94828000	72221900	2331800
CRYL1	Q9Y2S2;Q9Y2S2-2	Lambda-crystallin homolog	0	0	0	0	0	0	0	0	0	0	0	0	0	0	0	0	0	0	0	0	0	1859700	0	0	0	0	0	45804400	0	59268800	0	24441300	0	6636700	0	0	0	0	8858600	29874900	71892600	162429900	18870700	4624700	20881500	18940000	0
CRYM	Q14894	Ketimine reductase mu-crystallin	0	0	2597200	0	0	28294800	20576800	0	6116200	2288700	0	7485800	0	0	7425300	0	0	0	0	58593900	20888300	3952100	50917000	0	246563000	77134800	2830300	282871000	31275100	194710000	15401300	136231100	19273000	32621100	36413300	11430000	581119130	267749500	118460100	891473000	276779400	1345108000	905338800	408766800	171862700	347639400	4875900
CRYZ	Q08257;Q08257-2;Q08257-3	Quinone oxidoreductase	0	0	0	0	0	0	0	0	0	0	0	0	0	0	0	0	0	0	0	3766100	13998800	53786200	0	0	0	3798700	5688100	74842000	13156500	85585000	10780900	40564300	24012000	19468900	0	0	3610000	5947260	3099150	5621130	473780	10845200	5938800	0	8219900	297244500	0
CS	O75390	Citrate synthase, mitochondrial	0	0	0	0	0	0	0	0	0	0	0	0	0	0	0	0	0	0	0	4801900	341010	0	0	0	88494400	0	0	465713400	133408200	472630000	5418000	71650200	20511300	28901900	0	0	23398000	0	2235610	0	14468240	27033900	1390500	0	32306360	459252200	0
CSE1L	P55060;P55060-2;P55060-3;P55060-4	Exportin-2	0	0	0	0	0	0	0	0	0	0	0	0	0	0	0	0	0	0	0	0	0	0	0	0	0	0	0	26514400	5167800	16371400	0	0	0	0	0	0	23116000	12650000	18254000	56279600	20707000	48057000	14605000	10491000	49308920	194676000	0
CSF1	P09603;P09603-2;P09603-3	Macrophage colony-stimulating factor 1	119990900	72023000	135471000	48824100	112580000	186425200	204970000	152750200	62255000	99984600	14965000	132807000	49499700	70108000	245601000	166280000	219059000	190224000	155886000	136319000	117186000	89731900	421154000	88276000	473511000	146652000	82151700	22933000	18133500	15583700	52347500	184325000	90795000	41270100	67564000	92347000	872742600	670181300	737016200	1697308500	857347400	915413900	1445978400	761550900	425696800	398230400	1678300
CSF1R	P07333;P07333-2	Macrophage colony-stimulating factor 1 receptor	252580000	55112500	50954000	688770000	122766200	348508000	375043000	145303000	88219200	50278300	67367300	260933000	165647300	25565500	1092120000	151595600	235535000	77668000	129441000	602734000	314428000	96577000	1097154000	460292110	1077520000	819194200	184426000	135890400	79040000	110487600	204393400	455973700	968183000	115729300	359212000	305778100	34898700	41078900	12127500	9550900	36252200	22602900	51445000	21070900	63465200	821011000	118661000
CSK	P41240	Tyrosine-protein kinase CSK	0	0	0	0	0	0	0	0	0	0	0	0	0	0	0	0	0	0	0	0	0	0	0	0	0	0	0	0	0	0	0	0	0	0	0	0	0	0	0	0	0	3244300	0	0	793260	22335940	0
CSPG4	Q6UVK1	Chondroitin sulfate proteoglycan 4	33278800	5986100	0	0	0	6983400	0	6905800	3970000	0	0	0	0	3981900	22577200	0	26485000	0	0	11451000	15746200	0	11839000	3307600	11460000	11794000	3393400	0	0	0	0	9897900	2054200	2048600	3023500	0	1638098900	849763770	523632700	675544020	1083309590	587789700	2080577330	1112147000	713380500	120101980	0
CSRP1	P21291	Cysteine and glycine-rich protein 1	3773300	0	0	0	0	53571000	0	0	0	47796800	83312000	7724100	0	305507000	0	0	0	0	0	0	2424000	0	5692900	0	43074600	0	0	732280000	59721900	1065232000	34234800	437356500	46950000	65541600	0	0	66593000	33681200	72415200	128214900	23987700	231737800	84896700	62711300	92688900	879131000	0
CST3	P01034	Cystatin-C	85402507300	68869764200	54893482000	141108098000	77658580200	51114580000	96029505600	63104187000	49353584000	25667257500	9321636000	59470020000	38269704900	43072814900	85916600300	74580424900	77727635900	78786310900	47296557000	107036087000	91318742500	48090281600	226508012000	79120724000	132652666800	148401181000	101197511400	33636896540	17717071100	14197656000	52715403600	186811914100	75344372200	60329691000	96073864700	102832350100	155190853500	111594355800	107628590500	210455100000	100971119700	74996548000	148122401600	104912936500	107360487500	193845701900	19023621000
CST6	Q15828	Cystatin-M	0	0	0	0	0	0	0	0	0	0	0	0	0	0	0	0	0	0	0	57237000	18574300	24008100	65330000	23658000	112452000	89936000	60590000	1733500	0	0	0	96530000	10885000	12423000	43531000	20740800	46191800	16626000	7694400	14584200	33080000	9402100	29211000	16198100	15435400	6586100	6417900
CSTA	P01040	Cystatin-A	0	0	0	0	0	0	0	0	0	34998000	0	0	0	0	0	0	0	0	0	6398900	5677500	4214800	7492900	0	0	0	25850700	26302000	7156600	0	8665700	4805900	49356000	13127000	0	6397700	0	0	0	0	0	0	0	0	0	0	33085300
CSTB	P04080	Cystatin-B	25636000	0	16869000	55568000	523855000	175130000	40098000	31339000	45369000	94660000	100853000	21838000	56157000	45239000	58121000	163380000	33363000	65162000	41259000	38838100	105254000	137463000	106992000	133856000	242382000	24158200	32743300	234470000	43373000	225102000	31336000	163278000	94818000	140526000	19160200	28844200	31491000	22371900	31010300	28924700	454778600	56228800	18490920	26141560	25956500	305682000	4434700
CSTF2	P33240;P33240-2	Cleavage stimulation factor subunit 2	0	0	0	0	0	0	0	0	0	0	0	0	0	0	0	0	0	0	0	0	0	0	0	0	0	0	0	0	0	0	0	0	0	0	0	0	0	0	0	0	0	0	0	0	0	43344600	0
CTBS	Q01459	Di-N-acetylchitobiase	92447700	40259200	100866000	37258000	10633000	56931100	118502000	52457000	11889600	0	0	45346000	29950300	22748400	99694000	61385000	148719000	102417000	119202800	81382000	116253600	65435900	92190000	29593600	74861000	67935000	40111800	4276800	37565500	0	28862000	4791000	61106600	10509400	97707600	35972200	0	0	11428000	26773100	8300000	8826800	77055000	8711100	3465600	87753000	22535700
CTHRC1	Q96CG8;Q96CG8-2;Q96CG8-3	Collagen triple helix repeat-containing protein 1	0	0	0	0	0	0	0	0	0	0	0	0	0	0	0	0	0	0	0	0	0	0	0	0	0	0	0	0	0	0	0	0	0	0	0	0	179762000	115888000	86919400	198061000	87164700	170032000	298360000	99190900	53572800	11955080	0
CTNNA2	P26232;P26232-2;P26232-3;P26232-4;P26232-5;P26232-6	Catenin alpha-2	0	0	0	0	0	0	0	0	0	0	0	0	0	0	0	0	0	0	0	0	0	0	0	0	0	0	0	0	0	0	0	0	0	0	0	0	0	0	0	0	0	73619600	0	0	0	0	0
CTNNB1	P35222	Catenin beta-1	0	0	0	0	0	0	0	0	0	0	0	0	0	0	0	0	0	0	0	1468600000	1903739100	1917199737	40175000	1267000000	4415204300	147000000	150346108	2667872094	40968823	3626059269	0	5767291772	1778036726	1091100000	1585700000	134760000	0	0	1685100	3442700	0	129931400	0	0	860850	0	4671800907
CTPS2	Q9NRF8	CTP synthase 2	0	0	0	0	0	0	0	0	0	0	0	0	0	0	0	0	0	0	0	0	0	0	0	0	0	0	0	0	0	0	0	0	0	0	0	0	0	0	0	682910	0	19850510	0	0	24021900	17840800	0
CTRB2	Q6GPI1	Chymotrypsinogen B2	0	0	0	0	0	0	0	0	0	0	0	0	0	0	0	0	0	0	0	0	0	0	0	0	0	0	0	0	0	0	0	0	0	0	0	0	0	498210	0	0	0	851680	0	566620	15005800	0	0
CTSA	P10619;P10619-2	Lysosomal protective protein	0	0	0	0	0	0	0	0	0	0	0	0	0	0	0	0	0	0	0	11879000	20515000	10871000	0	0	0	11037000	25688000	0	0	0	0	11379000	0	14841000	8429100	15868000	308159000	409771000	399374800	166738800	387570000	193253800	681180300	396304700	322244900	74444820	0
CTSB	P07858	Cathepsin B	192686600	234973300	168909600	126970300	277313000	96568300	530494000	134514500	121035600	127714400	14104700	761866700	84113400	76567000	400099600	283099000	249914000	279367000	255115800	357018000	354878600	141123400	464987200	291191200	442154800	463014300	235144900	164936500	119836000	8994300	253865100	656538100	325166600	187730000	400543300	316841300	1135377000	948301900	1085178200	2182115000	1340904800	1654249400	2259538800	1374468000	904206100	678646100	37628900
CTSC	P53634;P53634-2;P53634-3	Dipeptidyl peptidase 1	0	0	0	0	0	0	0	0	0	0	0	0	0	0	0	0	0	0	0	2991600	7810600	0	9562800	29589000	31131300	0	4535700	0	0	0	0	0	11829700	10379000	6251900	0	243582600	530280500	239712300	151702600	428293240	471977700	629729700	226289000	245460600	237377600	0
CTSD	P07339	Cathepsin D	1675156000	2478777000	3175750000	388237000	2148343000	784369600	2319514000	1522772000	2788744000	788231400	694154000	2116544000	1049278700	933311000	2929095600	1048769500	1823044000	3356277000	2235956000	1383724300	2091324200	1947132000	993982000	1886579000	1685891000	2290299000	1889257100	1422399900	249625100	836190000	630654500	1865050000	1902355000	888288000	1370673100	2092446400	3033870000	6258458400	7449816500	1356402200	6393822600	3502466200	4985704800	4516374300	7526339000	5216094700	367350700
CTSF	Q9UBX1	Cathepsin F	68437700	5160000	42992900	5370900	19329200	23973100	62383900	21344800	17594200	0	0	26757000	0	1854100	67965200	30396800	52964000	22148200	71493000	227297300	103281300	35893600	89094400	69806300	14319700	111497000	44888000	12305500	1562300	0	14922100	101667100	29610400	14539600	47030000	144966300	2490326000	2260509500	1545480000	692733000	1294063100	822862500	2417174900	1944244200	1113738900	52741650	3111000
CTSG	P08311	Cathepsin G	0	0	0	0	0	0	0	0	0	0	0	0	0	0	0	0	0	0	0	0	0	5813000	0	0	21316000	0	0	171468000	0	82633700	0	0	0	3985200	5481100	0	0	0	0	1035900	0	102411000	361320	0	111446000	0	0
CTSH	P09668	Pro-cathepsin H	39924100	18304000	9935300	0	0	62649200	116626000	0	0	6007600	6519200	35951000	19184300	21498700	139992000	0	71544000	4446500	33029000	6367300	0	0	5150300	0	0	17494600	2478500	0	0	0	0	14760000	18164000	0	11730900	0	245427000	239084000	157246000	215374000	129479700	107013300	429832000	177212000	40289900	112461700	0
CTSL	P07711;P07711-3	Procathepsin L	151897700	149064000	77347000	23087000	137517000	139621900	340120400	107985000	81376200	26697800	10524000	38170000	29025000	115465100	157056000	75972000	279489600	98954300	53764000	155569000	166250000	142053000	224090000	131929000	253843000	230132000	73277000	47144000	27764000	17047600	45302000	158265000	195342000	46878000	152101000	110563000	1234032319	1931316524	1430601369	2260642435	1702043019	1315464773	3381091912	1252125490	829243668	599600157	51283400
CTSO	P43234	Cathepsin O	0	0	0	0	0	17305900	0	0	0	0	0	0	0	0	10028000	0	23335000	0	4832300	0	0	0	0	0	0	0	0	0	0	0	0	0	0	0	0	0	0	0	0	0	0	0	0	0	0	0	0
CTSS	P25774;P25774-2	Cathepsin S	43927300	6653400	18989000	57635000	31335500	23445500	20253100	7574300	0	3212600	0	32128900	16169000	2122400	100713700	6123300	11122000	29111000	68798000	16985000	34522000	6155500	0	6890100	35958000	10542000	2825500	0	0	0	0	8051300	18026000	0	0	29506000	24135100	20622900	14418700	28451700	25969400	47582500	39499100	9925700	0	790640	0
CTSV	O60911	Cathepsin L2	0	0	0	0	0	0	0	0	0	0	0	0	0	0	0	0	0	0	0	0	0	0	0	0	0	0	0	0	0	0	0	0	0	0	0	0	3704581	13135776	6995631	1872565	5936481	35927	2015388	8010910	2619332	142343	0
CTSZ	Q9UBR2	Cathepsin Z	127990000	59990000	36235500	51854000	52498000	189925000	170761800	59797900	0	61440200	14615000	44612300	21448000	83707000	168986000	0	240712000	153168000	85903000	99562000	74624000	22391100	249709000	32410400	105464000	128463000	29514000	3978300	19019900	5741100	20136000	23127600	101092000	10680600	46266000	25959000	53960600	64157000	39792400	22015100	115043700	94276000	67968100	39098300	17025300	53859000	8605000
CTTN	Q14247;Q14247-2;Q14247-3	Src substrate cortactin	0	0	0	0	0	0	0	0	0	0	0	0	0	0	0	0	0	0	0	0	0	870090	0	0	0	0	0	5637400	4943800	0	190260	0	507670	0	0	0	2180900	0	0	4650100	0	17648900	6665700	0	1799900	82452200	0
CUEDC2	Q9H467	CUE domain-containing protein 2	0	0	0	0	0	0	0	0	0	0	0	0	0	0	0	0	0	0	0	0	0	0	0	0	0	0	0	0	0	0	0	0	0	0	0	0	53666100	5098100	0	63129900	10594800	31672700	21730700	9746500	0	599660	0
CUL1	Q13616	Cullin-1	0	0	0	0	0	0	0	0	0	0	0	0	0	0	0	0	0	0	0	0	0	0	0	0	0	0	0	0	0	0	0	0	0	0	0	0	0	0	0	2760000	0	12958400	0	888150	56637240	21070200	0
CUL2	Q13617;Q13617-2	Cullin-2	0	0	0	0	0	0	0	0	0	0	0	0	0	0	0	0	0	0	0	0	0	0	0	0	0	0	0	0	0	0	0	0	0	0	0	0	0	0	0	0	0	16816200	0	0	34419400	5052490	0
CUL3	Q13618;Q13618-2;Q13618-3	Cullin-3	0	0	0	0	0	0	0	0	0	0	0	0	0	0	0	0	0	0	0	0	0	0	0	0	0	0	0	0	0	0	0	0	0	0	0	0	50685000	0	0	153915000	150570000	69642000	39116600	0	126923600	29102310	0
CUL4A	Q13619;Q13619-2	Cullin-4A	0	0	0	0	0	0	0	0	0	0	0	0	0	0	0	0	0	0	0	0	0	0	0	0	0	0	0	0	0	0	0	0	0	0	0	0	218270	0	0	0	320455	16802579	0	0	12385999	7349977	0
CUL4B	Q13620;Q13620-1;Q13620-3	Cullin-4B	0	0	0	0	0	0	0	0	0	0	0	0	0	0	0	0	0	0	0	0	0	0	0	0	0	0	0	0	0	0	0	0	0	0	0	0	218270	0	0	0	320455	7113491	0	0	7777801	12946313	0
CUL5	Q93034	Cullin-5	0	0	0	0	0	0	0	0	0	0	0	0	0	0	0	0	0	0	0	0	0	0	0	0	0	0	0	0	0	0	0	0	0	0	0	0	0	0	0	2581300	0	14625400	778010	0	18676800	7085320	0
CUTA	O60888;O60888-2;O60888-3	Protein CutA	394513200	178926800	123393000	86734000	140058000	56534200	596389000	145353000	114627000	40326000	23967000	153580700	37256000	54848700	488163000	114264000	929166000	263274000	278257000	1061273500	401080300	145376400	1313004000	650877000	295220000	1555262000	377449100	218628000	111362000	105656900	159776100	971269000	319094000	155013000	1565302000	683069000	1475448900	1059965100	318549000	711913000	2153654100	121532000	1035061700	654758900	584509000	465399300	63067000
CUTC	Q9NTM9	Copper homeostasis protein cutC homolog	0	0	0	0	0	0	0	0	0	0	0	0	0	0	0	0	0	0	0	0	0	0	0	0	0	0	0	0	0	0	0	0	0	0	0	0	0	0	540670	0	626110	0	0	0	0	60107900	0
CXCL10	P02778	C-X-C motif chemokine 10	0	0	0	0	0	0	0	0	0	0	0	0	0	0	0	0	0	0	0	0	0	157973000	0	0	42780000	0	0	0	0	0	0	0	5047300	0	0	0	165945000	81695200	53045500	617456000	131889000	774697000	121512000	36376000	7894900	0	0
CXCL12	P48061;P48061-2;P48061-3;P48061-4;P48061-5;P48061-6	Stromal cell-derived factor 1	32560000	34881000	27632800	32275000	31148000	0	71637900	24271000	0	0	0	41201000	19811000	0	43900000	44641000	53871000	22276000	68321000	95243000	329371500	148335000	163969000	131218000	195540000	204043000	38013400	10025000	0	0	31393000	136207000	54069000	29778000	88803000	240979000	462763900	527289000	271883000	983186000	315098200	1146108000	1352688000	371386700	184958600	1518500	0
CXCL13	O43927	C-X-C motif chemokine 13	0	0	0	0	0	0	0	0	0	0	0	0	0	0	0	0	0	0	0	0	0	0	0	0	0	0	0	0	0	33699800	0	0	0	0	0	0	0	0	0	0	0	30957000	0	0	0	0	0
CXCL16	Q9H2A7	C-X-C motif chemokine 16	32091000	26487000	34701000	58384000	45672800	26032000	37059000	35887000	0	12445000	0	0	0	0	39916000	0	54326000	19459000	49156000	0	0	0	0	0	0	0	0	0	0	0	0	0	0	0	0	0	360710400	397159000	463803000	250209600	579421000	115434000	266838000	455347000	363610000	329986900	0
CYB5B	O43169	Cytochrome b5 type B	0	0	0	0	0	0	0	0	0	0	0	0	0	0	0	0	0	0	0	0	0	0	0	0	10512000	0	0	140937000	15388900	86830000	2117900	30722000	20318000	0	0	0	0	0	0	0	0	0	0	0	3249000	6194300	0
CYB5R3	P00387;P00387-2;P00387-3	NADH-cytochrome b5 reductase 3	0	0	0	0	0	0	0	0	0	0	0	0	0	0	0	0	0	0	0	0	0	0	0	0	83481700	0	0	493491000	22642600	334371000	2077400	89742000	29181800	57234400	0	0	0	0	2126700	3527100	0	14360000	0	0	43889000	5656200	0
CYBA	P13498	Cytochrome b-245 light chain	0	0	0	0	0	0	0	0	0	0	0	0	0	0	0	0	0	0	0	5613800	3498200	9866400	23796300	0	0	29892000	0	62433000	0	37071500	8402980	22874000	85956000	45908000	0	0	0	0	0	0	0	0	0	0	0	0	0
CYBB	P04839	Cytochrome b-245 heavy chain	0	0	0	0	0	0	0	0	0	0	0	0	0	0	0	0	0	0	0	0	5288500	150539900	0	0	40349000	2510200	0	179835200	0	65868000	1279000	4833600	250020800	121303480	0	0	0	2957410	4054820	1902380	0	0	0	0	6265600	0	0
CYBRD1	Q53TN4;Q53TN4-3	Plasma membrane ascorbate-dependent reductase CYBRD1	0	0	0	0	0	0	0	0	0	0	0	0	0	0	0	0	0	0	0	0	5731600	18652000	0	0	53040000	0	3423900	96228000	0	104292000	10371000	10562000	0	23110000	0	0	0	0	0	0	0	0	0	0	0	0	0
CYC1	P08574	Cytochrome c1, heme protein, mitochondrial	0	0	0	0	0	0	0	0	0	0	0	0	0	0	0	0	0	0	0	0	0	0	0	0	0	0	0	57013000	0	15638000	818900	0	0	0	0	0	0	0	0	0	0	0	0	0	0	0	0
CYCS	P99999	Cytochrome c	148363500	73106100	8633600	33977000	92491000	16959800	66846000	31011000	15500600	660941000	12165500	35045800	4079100	86533000	149788000	42990000	202219000	77477900	29670000	0	0	0	0	0	0	0	0	0	0	0	0	0	0	0	0	0	1304300	0	0	0	0	0	0	0	829100	23219000	0
CYFIP1	Q7L576;Q7L576-2;Q7L576-3	Cytoplasmic FMR1-interacting protein 1	0	0	0	0	0	0	0	0	0	0	0	0	0	0	0	0	0	0	0	0	2278650	0	0	0	0	0	0	46945689	11333199	35230035	0	24080439	0	0	0	0	0	0	8861285	7925603	1979315	57299929	2686427	267150	14634776	7721599	0
CYFIP2	Q96F07;Q96F07-2	Cytoplasmic FMR1-interacting protein 2	0	0	0	0	0	0	0	0	0	0	0	0	0	0	0	0	0	0	0	0	2278650	0	0	0	0	0	0	24030611	22145401	68520865	0	4887561	0	0	0	0	0	0	4084675	6369547	1979315	56992671	951873	267150	15070624	16504521	0
CYRIA	Q9H0Q0	CYFIP-related Rac1 interactor A	0	0	0	0	0	0	0	0	0	0	0	0	0	0	0	0	0	0	0	0	0	0	0	0	6566000	0	0	27443100	3228200	406780	0	0	0	0	0	0	816308	95808	639966	0	6568224	3534410	727667	419030	405960	7702414	0
CYRIB	Q9NUQ9;Q9NUQ9-2	CYFIP-related Rac1 interactor B	0	0	0	0	0	0	0	0	0	0	0	0	0	0	0	0	0	0	0	1982500	2827300	28185700	1193200	1083900	6566000	6398000	0	57985700	29366000	160568220	788720	17311200	5312300	11822900	0	2510000	14777092	20466492	73975034	75252000	349752876	133816590	238256333	92458470	165222440	633293586	0
CYSTM1	Q9H1C7	Cysteine-rich and transmembrane domain-containing protein 1	0	0	0	0	0	0	0	0	0	0	0	0	0	0	0	0	0	0	0	3199800	34678700	25851000	0	8659700	0	2521100	10566000	37813600	1977500	11288000	7026600	20526800	14112000	5512200	0	12054800	26240900	140901000	303220000	0	187032000	10252500	23084200	97472400	109430000	40793500	0
CYTL1	Q9NRR1	Cytokine-like protein 1	48598500	0	0	14137000	0	15557000	0	18373000	19420300	0	0	34588400	0	0	24985500	0	64811900	53435900	9334900	44786000	33792000	0	96851000	0	128188000	36179000	43183600	6360100	0	0	21341500	56435000	24031000	16112000	68644100	46767600	93462000	48132000	43645600	26659900	12991800	75611300	45795600	73801000	48314000	25546100	18564300
CZIB	Q9NWV4	CXXC motif containing zinc binding protein	0	0	0	0	0	0	0	0	0	0	0	0	0	0	0	0	0	0	0	0	0	0	0	0	0	0	0	0	0	0	0	0	0	0	0	0	1362600	4939700	13631700	0	21920800	15973600	9725300	10285000	31395400	96726800	0
DAG1	Q14118	Dystroglycan 1	2233718000	863430000	917908000	2714204000	1103058600	924068000	2157593700	932991800	568038000	214014100	131138400	1569409000	478713000	115887600	1820509000	1961654000	2064634200	1069966300	1386750000	2829463500	1910607200	718406000	5361990600	2147223100	3051635000	3728866300	1590312100	444037300	292988500	262270800	996448100	3239209400	1204179500	1294694200	2024284100	2313403200	23476220700	13238777600	14620472700	10530776000	12837703000	9970644000	23903548700	18485449700	11103281800	4950816600	416491300
DAP	P51397	Death-associated protein 1	0	0	0	0	0	0	0	0	0	23654100	0	0	0	0	0	0	0	0	0	0	0	0	0	0	0	0	0	0	0	0	0	0	0	0	0	0	0	0	0	0	0	0	0	0	0	0	0
DARS1	P14868;P14868-2	Aspartate--tRNA ligase, cytoplasmic	0	0	0	0	0	0	0	0	0	0	0	0	0	0	0	0	0	0	0	0	0	0	0	0	0	0	0	64192800	31500500	9429100	0	0	0	2165200	0	0	0	0	5099800	12286900	0	58278670	0	0	146275900	543833400	0
DAZAP1	Q96EP5;Q96EP5-2	DAZ-associated protein 1	0	0	0	0	0	0	0	0	0	0	0	0	0	0	0	0	0	0	0	0	0	0	0	0	0	0	0	0	0	0	0	0	0	0	0	0	0	0	872000	0	0	1723400	0	0	5370600	81824000	0
DBI	P07108;P07108-2;P07108-3;P07108-4;P07108-5;P07108-6	Acyl-CoA-binding protein	278369000	150226100	188617000	287220000	363560000	401616000	334367000	261343000	200143000	3163068300	132669000	367889000	91575000	935274000	372705000	396536000	344015000	298001000	265469000	40429000	63565000	81821700	210006000	98154000	172349000	7085000	44762300	192834200	445789200	83247500	31510700	453709000	243865000	426721000	27948000	11542000	19796000	40509900	36382400	18807800	93255000	20895900	22805600	21995560	39257000	2362597000	0
DBN1	Q16643;Q16643-2;Q16643-3	Drebrin	0	0	0	0	0	0	0	0	0	0	0	0	0	0	0	0	0	0	0	0	2239100	2895200	0	0	0	0	1979800	53467000	26222700	20508000	2160300	7243700	0	13761100	0	1407700	0	0	1112800	2096460	0	78587900	2039400	3535300	0	231950000	0
DBNL	Q9UJU6;Q9UJU6-2;Q9UJU6-3;Q9UJU6-4;Q9UJU6-5;Q9UJU6-6	Drebrin-like protein	0	0	0	0	0	0	0	0	0	28747410	0	0	0	0	0	0	0	0	0	0	0	3718740	0	0	0	0	0	16839400	65901500	45942000	0	4591000	0	11034500	0	0	419160	0	17074960	14628940	25894500	55489700	6518590	0	78228000	634530800	0
DCC	P43146	Netrin receptor DCC	43535100	3947800	0	87303200	18577700	42108800	78127700	0	0	0	0	11452000	0	0	34895800	0	72053600	4600400	6275700	48692600	8030800	0	67654000	18701800	41937800	95015400	2416900	0	0	0	0	23131300	18335600	4066600	15032600	3548200	205318100	325833800	126972800	28984400	290123300	49570850	194966000	47052800	155378300	41327990	0
DCD	P81605;P81605-2	Dermcidin	0	0	0	0	0	0	0	0	8440800	34178000	0	0	0	0	0	0	0	4923600	0	47724000	244342000	34338000	585581000	86368000	111415000	24765000	84051000	136593000	81977000	141544000	187881000	117869000	172311000	149525000	64377800	72919000	0	0	0	0	0	0	0	0	0	0	240766000
DCDC2	Q9UHG0;Q9UHG0-2	Doublecortin domain-containing protein 2	0	0	0	0	0	0	0	0	0	0	0	0	0	0	0	0	0	0	0	2014700	68128900	101275000	0	20314500	0	0	20750100	21282900	3051300	7092000	2833800	14569100	1351200	26497200	0	2651800	3426460	22212100	47873000	0	16675070	0	579900	3402360	26729000	3263340	0
DCHS1	Q96JQ0	Protocadherin-16	0	0	0	0	0	0	0	0	0	0	0	0	0	0	0	0	0	0	0	0	0	0	0	0	0	0	0	0	0	0	0	0	0	0	0	0	98010780	43195200	34761410	57822080	165220500	46422700	59965400	25980370	51840000	50186800	0
DCK	P27707	Deoxycytidine kinase	0	0	0	0	0	0	0	0	0	0	0	0	0	0	0	0	0	0	0	0	0	0	0	0	0	0	0	0	0	0	0	0	0	0	0	0	0	0	0	0	0	0	0	0	0	304443200	0
DCN	P07585;P07585-2;P07585-3;P07585-4;P07585-5	Decorin	128373800	58647900	170296000	0	93148300	52202800	234645000	35121000	10567000	0	1568100	94963000	0	0	80417100	50751200	183235000	12403000	100178800	107312000	131223000	101084300	44746000	73817600	61366000	206199300	28230000	90305400	15360600	12925700	22266400	48998200	30868100	55355000	14792000	91558000	5598061000	3570977600	3021762400	3083780400	4852913000	1584952700	6985046600	2553001100	628069000	44127300	0
DCPS	Q96C86	m7GpppX diphosphatase	0	0	0	0	0	0	0	0	0	0	0	0	0	0	0	0	0	0	0	0	0	0	0	0	0	0	0	0	0	0	0	0	0	0	0	0	0	0	0	0	0	0	0	0	0	78468200	0
DCTN1	Q14203;Q14203-2;Q14203-3;Q14203-4;Q14203-5;Q14203-6	Dynactin subunit 1	0	0	0	0	0	0	0	0	0	0	0	0	0	0	0	0	0	0	0	0	0	0	0	0	0	0	0	296051500	712320	277894400	1434900	20206600	1331500	2661800	0	0	0	0	0	18083700	0	138720400	0	0	276748400	15253730	0
DCTN2	Q13561;Q13561-2;Q13561-3	Dynactin subunit 2	0	0	0	0	0	0	0	0	0	0	0	0	0	0	0	0	0	0	0	0	2562490	3177210	0	0	8381800	0	0	212983900	8984100	367719000	1628600	69426300	1060500	2981540	0	0	0	0	5826680	23850600	1768300	99214600	2045800	0	117530200	73486600	0
DCTN3	O75935;O75935-2;O75935-3	Dynactin subunit 3	0	0	0	0	0	0	0	0	0	0	0	0	0	0	0	0	0	0	0	0	0	0	0	0	0	0	0	0	0	0	0	0	0	0	0	0	0	0	0	0	0	9979000	0	0	19493700	1584500	0
DCTPP1	Q9H773	dCTP pyrophosphatase 1	0	0	0	0	0	0	0	0	0	0	0	0	0	0	0	0	0	0	0	0	0	0	0	0	0	0	0	0	0	0	0	0	0	0	0	0	5574600	7139300	4321900	0	4600600	5346400	2914200	0	5124200	175395000	0
DCUN1D1	Q96GG9	DCN1-like protein 1	0	0	0	0	0	0	0	0	0	0	0	0	0	0	0	0	0	0	0	0	0	0	0	0	0	0	0	0	0	0	0	0	0	0	0	0	0	0	0	6101100	0	22471800	0	0	58771400	14379200	0
DCXR	Q7Z4W1	L-xylulose reductase	0	0	0	0	0	0	0	0	0	0	0	0	0	0	0	0	0	0	0	0	0	0	0	0	0	0	1540000	44672000	0	17034000	0	4793400	0	0	0	0	0	0	7609300	0	6490450	16017400	0	2021400	80386000	29657800	0
DDAH1	O94760;O94760-2	N(G),N(G)-dimethylarginine dimethylaminohydrolase 1	33328100	0	0	0	0	148517700	11934000	0	18480500	43990300	46171500	0	0	178391100	0	0	17863800	0	0	86408646	192716472	97769240	85425980	6381300	540043220	53609700	63956737	1522191375	213250140	567724629	79816732	490543029	105512039	173373900	25659652	0	5407200	15062200	6925700	2002300	4672210	11797000	5698500	4212400	7782280	191462400	24406700
DDAH2	O95865	N(G),N(G)-dimethylarginine dimethylaminohydrolase 2	0	0	0	0	0	0	0	0	0	0	0	0	0	0	0	0	0	0	0	202454	8224728	10427860	762820	1880300	384780	0	616563	282990625	1669060	148931371	4515268	42041271	15165761	8309000	7093248	0	0	0	0	0	0	0	0	0	0	0	0
DDB1	Q16531;Q16531-2	DNA damage-binding protein 1	0	0	0	0	0	0	0	0	0	0	0	0	0	0	0	0	0	0	0	0	0	0	0	0	0	0	0	0	0	0	0	0	0	0	0	0	1993300	6772500	2718870	15290200	9207860	18414900	1855900	7368200	89837690	446556000	0
DDI2	Q5TDH0;Q5TDH0-2;Q5TDH0-3	Protein DDI1 homolog 2	0	0	0	0	0	4860500	0	0	33034100	0	28104000	0	0	0	0	8291600	0	0	0	0	0	716860	0	15312000	34409000	0	0	27241800	3054500	204427000	2161000	11468000	0	41609300	0	0	6137600	1993700	1252800	87512800	1301280	611219200	4016400	4302700	1128345000	29262500	0
DDOST	P39656;P39656-2;P39656-3	Dolichyl-diphosphooligosaccharide--protein glycosyltransferase 48 kDa subunit	0	0	0	0	0	0	0	0	0	0	0	0	0	0	0	0	0	0	0	0	0	0	0	0	0	0	0	67611000	0	0	0	0	4067700	0	0	0	0	0	0	0	0	0	0	0	0	0	0
DDR1	Q08345;Q08345-2;Q08345-4;Q08345-5;Q08345-6	Epithelial discoidin domain-containing receptor 1	0	8020900	0	0	9065900	15425000	2832000	0	0	0	0	0	0	0	0	0	0	0	0	950760	5872800	3489900	20731000	6495000	6445300	20720000	0	0	0	0	0	1592500	4253800	4566800	7418500	0	0	0	0	0	0	0	0	0	0	0	0
DDT	P30046;P30046-2	D-dopachrome decarboxylase	0	0	0	0	0	6744900	0	0	42731000	34597000	98292800	0	32901400	6384800	0	0	0	0	0	19770100	30416300	27374900	8928000	0	85492600	2200200	10879400	153295000	55078200	257085000	12456700	111799000	11581000	13091000	0	0	1338180	791170	744750	2363690	3561230	2773450	699260	230750	34302600	228090000	0
DDX1	Q92499;Q92499-2;Q92499-3	ATP-dependent RNA helicase DDX1	0	0	0	0	0	0	0	0	0	0	0	0	0	0	0	0	0	0	0	0	0	0	0	0	0	0	0	139791400	22971000	34804900	6573700	21230000	10591000	8736400	0	0	610000	252060	7365900	4517370	4262730	24823000	2243280	0	22424400	26089400	0
DDX17	Q92841;Q92841-1;Q92841-2;Q92841-3	Probable ATP-dependent RNA helicase DDX17	0	0	0	0	0	0	0	0	0	0	0	0	0	0	0	0	0	0	0	0	0	0	0	0	0	0	0	0	0	0	0	0	0	0	0	0	0	0	5208900	0	4193200	16742000	0	0	8039810	73673400	0
DDX39A	O00148;O00148-2;O00148-3	ATP-dependent RNA helicase DDX39A	0	0	0	0	0	0	0	0	0	7125600	0	0	0	0	0	0	0	0	0	0	0	0	0	0	0	0	0	0	0	0	0	0	0	0	0	0	0	0	2502216	1237880	7591921	9637522	4989805	0	8270141	159577037	0
DDX39B	Q13838;Q13838-2	Spliceosome RNA helicase DDX39B	0	0	0	0	0	0	0	0	0	7125600	0	0	0	0	0	0	0	0	0	0	0	0	0	0	0	0	0	0	0	0	0	0	0	0	0	0	0	0	8105234	4215320	11418279	33398678	9872695	0	25006699	389772063	0
DDX6	P26196	Probable ATP-dependent RNA helicase DDX6	0	0	0	0	0	0	0	0	0	0	0	0	0	0	0	0	0	0	0	0	0	0	0	0	0	0	0	0	0	0	0	0	0	0	0	0	0	0	0	0	0	3206720	0	0	2848970	14506300	0
DECR1	Q16698;Q16698-2	2,4-dienoyl-CoA reductase [(3E)-enoyl-CoA-producing], mitochondrial	0	0	0	0	0	0	0	0	0	0	0	0	0	0	0	0	0	0	0	0	0	0	0	0	0	0	0	92116200	15889300	59497000	0	8836300	0	1318500	0	0	0	0	0	0	0	1471400	0	0	9449980	103724000	0
DEFA1B;DEFA3	P59665;P59666	Neutrophil defensin 1; Neutrophil defensin 3	671550	0	0	24353000	55276000	0	37586000	0	423551000	38722500	28264000	17928000	613180000	36271600	0	292768000	0	3151800	0	32363400	436197000	834469000	403101000	367353000	1491443000	269754000	77329600	9519610000	57815400	1703852000	78149800	511358000	116009000	1628938000	46708900	62231000	4035300	26094300	105900000	282218000	489478000	3021171700	304588000	154496000	3025020000	43966600	27890200
DEK	P35659;P35659-2	Protein DEK	0	0	0	0	0	0	0	0	0	0	0	0	0	0	0	0	0	0	0	0	0	0	0	0	0	0	0	0	0	0	0	0	0	0	0	0	0	0	681050	0	1636900	1797200	0	0	1379220	139026700	0
DENR	O43583	Density-regulated protein	0	0	0	0	0	0	0	0	0	0	0	0	0	0	0	0	0	0	0	0	853850	774610	0	0	381250	0	0	3683600	5963900	6274600	0	3976700	596620	2045700	0	0	7045000	0	7396770	44638000	14660500	58030300	15391000	5063100	75220400	155907700	0
DERA	Q9Y315	Deoxyribose-phosphate aldolase	0	0	0	0	0	0	0	0	0	0	0	0	0	0	0	0	0	0	0	0	0	0	0	0	0	0	0	0	0	0	0	0	0	0	0	0	0	0	1071993	5923970	5573140	25680980	796420	0	96708600	8352960	0
DFFA	O00273;O00273-2	DNA fragmentation factor subunit alpha	0	0	0	0	0	0	0	0	0	0	0	0	0	0	0	0	0	0	0	0	0	0	0	0	0	0	0	0	0	0	0	0	0	0	0	0	0	0	200080	1362600	932230	0	0	0	910540	50269800	0
DGCR2	P98153;P98153-2;P98153-3	Integral membrane protein DGCR2/IDD	0	0	0	0	19001000	0	4195300	0	2750200	13423000	0	0	0	0	2258000	21813500	23787600	16664000	0	0	0	0	0	0	0	0	0	0	0	0	0	0	0	0	0	0	263714000	122254500	63637500	118739300	146018800	92731200	289326300	136240000	50483100	40110100	0
DGLUCY	Q7Z3D6;Q7Z3D6-2;Q7Z3D6-3;Q7Z3D6-4;Q7Z3D6-5	D-glutamate cyclase, mitochondrial	0	0	0	0	0	0	0	0	0	0	0	0	0	0	0	0	0	0	0	0	0	0	0	0	0	0	0	38549300	5440000	0	0	0	0	0	0	0	0	0	0	0	0	0	0	0	0	0	0
DHH	O43323	Desert hedgehog protein	0	0	0	0	0	0	0	0	0	0	0	0	0	0	0	0	0	0	0	0	0	0	0	0	0	0	0	0	0	0	0	0	0	0	0	0	1935500	7133200	8524700	20068700	7467200	4282100	4789200	14552800	0	0	0
DHRS7	Q9Y394;Q9Y394-2	Dehydrogenase/reductase SDR family member 7	0	0	0	0	0	0	0	0	0	0	0	0	0	0	0	0	0	0	0	0	0	0	0	0	0	0	0	77806000	2500000	45109400	0	7713400	3678500	0	0	0	0	0	0	0	0	0	0	0	0	0	0
DHX15	O43143	ATP-dependent RNA helicase DHX15	0	0	0	0	0	0	0	0	0	0	0	0	0	0	0	0	0	0	0	0	0	0	0	0	0	0	0	0	0	0	0	0	0	0	0	0	0	0	0	0	0	0	0	0	2006400	46977400	0
DHX9	Q08211;Q08211-2	ATP-dependent RNA helicase A	0	0	0	0	0	0	0	0	0	0	0	0	0	0	0	0	0	0	0	0	0	0	0	0	0	0	0	11728400	2475100	0	0	0	0	0	0	0	0	0	2416270	1589100	0	59205800	0	0	63281810	163831100	0
DIAPH1	O60610;O60610-2;O60610-3	Protein diaphanous homolog 1	0	0	0	0	0	0	0	0	0	0	0	0	0	0	0	0	0	0	0	0	0	0	0	0	0	0	0	0	0	0	0	0	0	0	0	0	0	0	651220	7659200	241040	33814730	2537520	0	36075900	19381260	0
DIPK1C	Q0P6D2;Q0P6D2-2	Divergent protein kinase domain 1C	0	0	0	0	0	0	0	0	0	0	0	0	0	0	0	0	0	0	0	0	0	0	0	0	0	0	0	0	0	0	0	0	0	0	0	0	72707600	33823000	23689300	94410400	22719600	55268800	57141000	37394000	0	0	0
DIPK2B	Q9H7Y0;Q9H7Y0-2	Divergent protein kinase domain 2B	0	0	0	0	0	0	0	0	0	0	0	0	0	0	0	0	0	0	0	0	0	0	0	0	0	0	0	0	0	0	0	0	0	0	0	0	54889400	29931000	10105400	25182200	31959200	14556200	36120100	16808780	15988700	0	0
DKC1	O60832;O60832-2	H/ACA ribonucleoprotein complex subunit DKC1	0	0	0	0	0	0	0	0	0	0	0	0	0	0	0	0	0	0	0	0	0	0	0	0	0	0	0	0	0	0	0	0	0	0	0	0	0	0	0	0	0	0	0	0	974340	221982200	0
DKK2	Q9UBU2	Dickkopf-related protein 2	0	0	0	0	0	0	0	0	0	0	0	0	0	0	0	0	0	0	0	0	0	0	0	0	0	0	0	0	0	0	0	0	0	0	0	0	57148300	52701100	27414280	206391200	12978370	34385500	60273700	30922800	10914460	4189160	0
DKK3	Q9UBP4	Dickkopf-related protein 3	42651073200	11576483000	7543999300	28777950000	15565739900	9649829000	37472468000	24231858000	5139578000	11574046600	806931000	24954868300	6798809000	8209126000	38582055000	25806484000	39378382000	11930028000	19804076000	34096241000	19187610000	6318170400	65822276000	16477267000	43278308000	45432638000	16664793300	7424303200	6867236200	2837848200	10941855000	45915562000	22914000000	13745110000	34486036000	23354055000	170666930000	73342666000	66669050000	229414507000	86622440000	143109480000	185540920000	113900558000	75309548000	69684999000	18968345000
DLAT	P10515	Dihydrolipoyllysine-residue acetyltransferase component of pyruvate dehydrogenase complex, mitochondrial	0	0	0	0	0	0	0	0	0	0	0	0	0	0	0	0	0	0	0	0	0	0	0	0	28116400	0	0	102024000	2336500	118032000	2902900	34498500	0	3954000	0	0	0	2288700	0	0	2153900	0	0	823790	1060600	7511300	0
DLD	P09622;P09622-2;P09622-3	Dihydrolipoyl dehydrogenase, mitochondrial	0	0	0	0	0	0	0	0	0	18906400	0	0	0	0	0	0	0	0	0	90160500	53971100	20487200	79084000	51024500	101782700	69155900	37030300	384590300	118870500	192605800	44811800	107896600	55314600	27136000	33995300	20820700	41805700	32245730	49049990	36614090	24986790	2118030	45178470	2592800	16873510	51979300	0
DLG1	Q12959;Q12959-2;Q12959-3;Q12959-4;Q12959-5;Q12959-6;Q12959-7;Q12959-8;Q12959-9	Disks large homolog 1	0	0	0	0	0	0	0	0	0	0	0	0	0	0	0	0	0	0	0	215630000	10999000	16295000	132400000	0	0	38774000	0	24154700	0	19130600	20254000	18549300	26441000	24867000	73032000	0	0	0	0	0	0	0	0	0	0	0	0
DLG4	P78352;P78352-2;P78352-3	Disks large homolog 4	0	0	0	0	0	0	0	0	0	0	0	0	0	0	0	0	0	0	0	0	0	0	0	0	0	0	0	32959100	9461500	38045200	0	0	0	0	0	0	0	0	0	0	0	0	0	0	0	0	0
DLK2	Q6UY11;Q6UY11-2	Protein delta homolog 2	0	0	0	0	0	0	0	0	0	0	0	0	0	0	0	0	0	0	0	0	0	0	0	0	0	0	0	0	0	0	0	0	0	0	0	0	31014000	25572700	13053000	5949100	34459000	8892400	4045300	9900900	30351100	38496000	0
DLST	P36957;P36957-2	Dihydrolipoyllysine-residue succinyltransferase component of 2-oxoglutarate dehydrogenase complex, mitochondrial	0	0	0	0	0	0	0	0	0	0	0	0	0	0	0	0	0	0	0	0	0	0	0	0	39515400	0	0	256945000	15938900	208564900	2940000	53604000	6891600	5202600	0	1660400	1001700	0	0	0	4006000	0	0	0	4517690	121021700	0
DMKN	Q6E0U4;Q6E0U4-10;Q6E0U4-11;Q6E0U4-12;Q6E0U4-13;Q6E0U4-14;Q6E0U4-16;Q6E0U4-2;Q6E0U4-3;Q6E0U4-4;Q6E0U4-5;Q6E0U4-6;Q6E0U4-7;Q6E0U4-8;Q6E0U4-9	Dermokine	0	0	0	0	0	0	0	0	0	0	0	0	0	0	0	0	0	0	0	0	0	0	0	0	0	0	0	0	0	0	0	0	0	0	0	0	28179000	18387900	14580800	24953400	12996100	4479970	10305000	5838400	2518300	0	0
DMTN	Q08495;Q08495-2;Q08495-3;Q08495-4	Dematin	0	0	0	0	0	0	0	0	0	0	0	0	0	0	0	0	0	0	0	0	0	0	114630000	0	470373000	0	1331500	262475600	14450300	810339000	47680300	118260500	0	55781100	0	0	0	0	0	29192480	0	94513810	0	3658000	139216490	48146200	0
DNAH9	Q9NYC9;Q9NYC9-2	Dynein axonemal heavy chain 9	0	0	0	0	0	0	0	0	0	0	0	0	0	0	0	0	0	0	0	14916000	12144000	5380300	28927000	19006000	27469000	0	3331000	18339500	0	7338300	3445800	0	6072200	5981500	1997400	0	0	0	0	0	0	0	0	0	0	0	0
DNAJA1	P31689;P31689-2	DnaJ homolog subfamily A member 1	0	0	0	0	0	0	0	0	0	0	0	0	0	0	0	0	0	0	0	0	0	0	0	0	0	0	0	42342300	4381800	16089000	0	0	0	0	0	0	437000	0	1233000	1224300	1201100	11035160	1941300	0	5265200	12793000	0
DNAJA4	Q8WW22;Q8WW22-2;Q8WW22-3	DnaJ homolog subfamily A member 4	0	0	0	0	0	0	0	0	0	0	0	0	0	0	0	0	0	0	0	0	0	0	0	0	0	0	0	0	0	0	0	0	0	0	0	0	0	0	0	1286900	1607600	13140600	0	0	27447900	0	0
DNAJB1	P25685;P25685-2	DnaJ homolog subfamily B member 1	0	0	0	0	0	0	0	0	0	0	0	0	0	0	0	0	0	0	0	0	0	0	0	0	0	0	0	0	0	0	0	0	0	0	0	0	0	0	0	0	0	1527200	0	0	10061500	765540	0
DNAJB11	Q9UBS4	DnaJ homolog subfamily B member 11	0	0	0	0	0	0	0	0	0	0	0	0	0	0	0	0	0	0	0	0	0	0	0	0	0	0	0	0	0	0	0	0	0	0	0	0	14944300	10335100	3301600	167810600	4780630	82103100	25571500	9320200	7212320	2554800	0
DNAJB2	P25686;P25686-2	DnaJ homolog subfamily B member 2	0	0	0	0	0	0	0	0	0	0	0	0	0	0	0	0	0	0	0	0	0	0	0	0	0	0	0	69923063	1538500	89980178	2152894	0	0	3015900	0	0	0	0	0	1399500	0	2208300	0	0	14378200	0	0
DNAJB6	O75190;O75190-2;O75190-3;O75190-4	DnaJ homolog subfamily B member 6	0	0	0	0	0	0	0	0	0	0	0	0	0	0	0	0	0	0	0	0	0	0	0	0	0	0	0	411480037	0	25254702	3245546	1918770	683450	781760	0	226440	0	0	0	0	0	0	0	0	0	0	0
DNAJC10	Q8IXB1;Q8IXB1-2;Q8IXB1-3	DnaJ homolog subfamily C member 10	0	0	0	0	0	0	0	0	0	0	0	0	0	0	0	0	0	0	0	0	0	0	0	0	0	0	0	0	0	0	0	0	0	0	0	0	14992500	65208100	44642340	9239900	41100680	2710300	17645700	7920570	30390600	106147210	0
DNAJC25;GNG10	Q9H1X3-3;P50151	DnaJ homolog subfamily C member 25; Guanine nucleotide-binding protein G(I)/G(S)/G(O) subunit gamma-10	0	0	0	0	0	0	0	0	0	0	0	0	0	0	0	0	0	0	0	0	0	0	0	0	0	0	0	65411000	4968200	74446000	0	0	0	0	0	0	0	0	0	0	0	0	0	0	0	0	0
DNAJC3	Q13217	DnaJ homolog subfamily C member 3	6583200	0	0	0	0	0	7823500	0	0	0	1713800	0	0	0	0	0	15461900	0	8742700	65187500	47008000	14132700	52109600	28553600	28365400	52653000	48231600	4992900	0	0	6490000	34801000	9765400	0	50589300	50112600	566887000	709751800	391282200	531713100	335915300	377219900	633687200	562488900	499216300	26363670	0
DNAJC5	Q9H3Z4;Q9H3Z4-2	DnaJ homolog subfamily C member 5	0	0	0	0	0	0	0	0	0	0	0	0	0	0	0	0	0	0	0	3344500	19542100	19139100	4059700	3823900	28078000	0	5676900	169782000	28240000	91632000	4106000	25823500	10611700	13547000	0	0	0	0	0	0	0	0	0	0	0	0	0
DNAJC8	O75937	DnaJ homolog subfamily C member 8	0	0	0	0	0	0	0	0	0	0	0	0	0	0	0	0	0	0	0	0	0	0	0	0	0	0	0	0	0	0	0	0	0	0	0	0	0	0	0	92180000	596230	1520600	0	0	2722900	105863000	0
DNAJC9	Q8WXX5	DnaJ homolog subfamily C member 9	0	0	0	0	0	0	0	0	0	13960600	0	0	0	0	0	0	0	0	0	0	0	0	0	0	0	0	0	0	0	0	0	0	0	0	0	0	0	0	288420	3830400	894370	12653600	0	942010	17897300	268368600	0
DNASE2	O00115;O00115-2	Deoxyribonuclease-2-alpha	0	0	0	0	0	0	0	0	0	0	0	0	0	0	0	0	0	0	0	4285900	9009500	3795100	0	7095900	22371000	11682000	6401600	0	969440	3974100	0	0	7309800	0	12411300	7506300	0	0	0	0	0	0	0	0	0	0	0
DNER	Q8NFT8	Delta and Notch-like epidermal growth factor-related receptor	236127000	87397000	47279000	216293800	51693000	0	248950000	80588000	34721000	0	0	90812000	52645000	9979700	228057000	55665000	239236000	74054000	88312000	146682000	73390000	25727000	222626000	109959000	96538000	220599000	56528000	18574400	17521900	0	31542000	222689000	61327000	35037600	115407000	103765000	199117000	207454100	139744000	49234000	259572000	98502700	194979100	164304000	185958000	142432200	0
DNM1	Q05193;Q05193-2;Q05193-3;Q05193-5	Dynamin-1	0	0	0	0	0	0	0	0	0	0	0	0	0	0	0	0	0	0	0	0	235660	2216511	0	0	194655539	0	0	1056840128	144516463	1159930024	2110500	229953370	0	2281400	0	0	2543800	0	0	2859845	1327274	57985922	0	2063000	88263180	6011129	0
DNM1L	O00429;O00429-2;O00429-3;O00429-4;O00429-5;O00429-6;O00429-7;O00429-8;O00429-9	Dynamin-1-like protein	0	0	0	0	0	0	0	0	0	0	0	0	0	0	0	0	0	0	0	0	0	0	0	0	0	0	0	84974000	4398100	28923700	0	0	0	0	0	0	0	0	0	0	0	0	0	0	0	0	0
DNM2	P50570;P50570-2;P50570-3;P50570-4;P50570-5	Dynamin-2	0	0	0	0	0	0	0	0	0	0	0	0	0	0	0	0	0	0	0	0	2601828	0	0	0	76625238	0	0	374611973	85384395	349210486	0	48620953	0	0	0	0	277285	0	5168458	20353545	3040155	77505267	1044100	0	146726523	10027167	0
DNM3	Q9UQ16;Q9UQ16-2;Q9UQ16-3;Q9UQ16-4;Q9UQ16-5	Dynamin-3	0	0	0	0	0	0	0	0	0	0	0	0	0	0	0	0	0	0	0	0	1262312	1645609	0	0	2284924	0	0	192468799	14806942	172823390	0	4908877	0	0	0	0	277285	0	4220102	11451001	1059441	14712711	1044100	0	24589598	2593694	0
DNMT1	P26358;P26358-2;P26358-3	DNA (cytosine-5)-methyltransferase 1	0	0	0	0	0	0	0	0	0	0	0	0	0	0	0	0	0	0	0	0	0	0	0	0	0	0	0	0	0	0	0	0	0	0	0	0	10998000	20312000	32496000	10224000	30722000	42406000	771200	85469000	60352000	118641200	0
DNPEP	Q9ULA0;Q9ULA0-2	Aspartyl aminopeptidase	0	0	0	0	0	0	0	0	0	0	0	0	0	0	0	0	0	0	0	0	0	0	0	0	0	0	0	0	0	0	0	0	0	0	0	0	0	0	0	0	0	0	0	0	2789080	94038490	0
DOCK2	Q92608;Q92608-2	Dedicator of cytokinesis protein 2	0	0	0	0	0	0	0	0	0	0	0	0	0	0	0	0	0	0	0	0	0	0	0	0	0	0	0	0	0	0	0	0	0	0	0	0	0	0	0	566830	0	769230	1226520	0	1090900	20657400	0
DPP3	Q9NY33;Q9NY33-2;Q9NY33-4	Dipeptidyl peptidase 3	0	0	0	0	0	7222100	0	0	0	61149900	5221500	0	0	0	0	0	0	0	0	0	26820600	7871200	0	0	0	0	3439900	49759000	116170000	108418400	3059300	27290000	8721600	4636400	0	0	3810600	1734600	2773300	9649900	28529600	0	11558490	0	36420500	1252754000	0
DPP6	P42658;P42658-2	Dipeptidyl aminopeptidase-like protein 6	20837400	0	0	0	0	0	24374100	0	0	0	0	0	0	0	13758700	0	0	11220600	0	23014000	5675400	3659300	6802900	0	12958000	18896000	0	79090500	0	37676900	0	6653700	2333000	0	0	0	53525080	32342300	964520	10557370	21160900	14720100	129733400	4524900	8948900	20889460	0
DPP7	Q9UHL4	Dipeptidyl peptidase 2	44937200	12557600	0	0	38102100	30556000	106400000	0	0	11879000	0	0	0	0	145239400	0	95593000	30840400	32214900	220267000	278271000	113384100	125182900	245449400	224943100	719137000	98303600	66871400	52835850	33760800	111159700	137215500	308440800	48460400	348331300	337747000	241011300	268496900	133431300	52315400	246999600	73696900	691273500	107303020	81363900	2508773740	38000500
DPT	Q07507	Dermatopontin	0	0	0	0	0	0	0	0	0	0	0	0	0	0	0	0	0	0	0	0	0	0	0	0	0	0	0	0	0	0	0	0	0	0	0	0	77609500	64062200	28391700	146558400	40563000	22379200	185483800	16588900	11996100	27658400	0
DPY30	Q9C005	Protein dpy-30 homolog	0	0	0	0	0	0	0	0	0	0	0	0	0	0	0	0	0	0	0	0	0	0	0	0	0	0	0	2933500	34042000	0	0	0	0	0	0	0	0	0	0	0	0	0	0	0	0	0	0
DPYSL2	Q16555;Q16555-2	Dihydropyrimidinase-related protein 2	0	0	0	0	0	223455652	0	0	36708727	65775500	956660329	28864788	0	1549956519	0	0	0	0	0	21927964	389346589	85246226	67170930	36363441	1781253848	23032000	37313000	10404228267	1585947648	15307512200	730502773	7836665245	849105423	1190556980	4711400	16015900	107559096	89716655	292535871	1248995969	364388172	7743953782	378663330	251859003	2510069903	1536607433	0
DPYSL3	Q14195;Q14195-2	Dihydropyrimidinase-related protein 3	0	0	0	0	0	33019510	0	0	2517086	0	13459050	2476756	0	170266685	0	0	0	0	0	0	535970	0	0	0	97893758	0	0	276254297	12038141	157672728	13818684	190106135	2595514	54647079	0	0	62168410	10301376	26499811	485437216	16818991	2544526021	115953823	48856894	185311771	31900207	0
DPYSL5	Q9BPU6	Dihydropyrimidinase-related protein 5	0	0	0	0	0	0	0	0	0	0	0	0	0	0	0	0	0	0	0	0	3971200	70015000	0	0	3335300	0	0	767055600	900796600	652207300	21190000	103057900	120050000	199840000	0	0	16805000	3116300	53293000	49743000	8413800	408029300	35463000	0	385947600	462540000	0
DRAXIN	Q8NBI3	Draxin	0	0	0	0	0	0	0	0	0	0	0	0	0	0	0	0	0	0	0	0	0	0	0	0	0	0	0	0	0	0	0	0	0	0	0	0	15819900	2473680	776730	241637000	1816200	5517800	70159200	21086220	0	0	0
DSC1	Q08554;Q08554-2	Desmocollin-1	0	0	0	0	0	0	0	0	0	81722000	0	0	0	0	0	0	0	0	0	34645500	131409000	20947000	93042900	15028600	0	8110400	978521700	97419600	18437000	24915400	14068600	171773000	97659000	17007000	6022300	32757000	0	0	0	0	0	0	0	0	0	0	70384400
DSC2	Q02487;Q02487-2	Desmocollin-2	28701800	0	18415000	76737600	0	58070200	33559000	0	15823000	13444800	0	0	31474800	1126200	103941300	0	0	5251900	10122000	195908100	137593000	35841700	283917600	82168900	445272900	195251000	113316200	0	30698200	0	58935000	198394600	188816000	20610400	75863700	95419400	5171700	10044400	4744800	12118600	12527700	18834600	4303670	11239800	9543500	62935900	0
DSC3	Q14574;Q14574-2	Desmocollin-3	0	0	0	0	0	0	0	0	0	0	0	0	0	0	0	0	0	0	0	24004100	7480200	12291000	0	14333000	0	0	156820000	14281200	10209000	4166500	13345000	9818000	12472000	17931000	5945500	9776100	240036200	276067800	94808700	138653000	84607000	126759900	140074000	69948000	49120810	7232500	12680000
DSG1	Q02413;Q02413-2	Desmoglein-1	0	0	0	0	0	0	0	0	0	525585500	0	0	0	0	0	0	0	0	0	150145000	411374600	135308800	329641200	78563100	24748700	28250850	1889943510	459298800	68029800	115419230	110042090	533446500	324302800	129640800	73511500	167843900	0	0	0	0	0	0	0	0	0	0	306908200
DSG2	Q14126	Desmoglein-2	5573200	0	6759400	0	0	3858300	14698400	5166600	0	2242600	0	3978600	0	0	0	0	10927000	0	0	0	5097200	3302000	0	21465600	0	0	0	12486000	4987000	0	0	0	0	0	0	0	0	0	0	0	0	0	0	0	0	0	0
DSP	P15924;P15924-2;P15924-3	Desmoplakin	13561000	0	0	0	0	0	0	0	0	1804602700	0	20580000	0	24399000	0	29850000	0	28826000	0	46363100	245011000	113462690	155282600	20700500	0	10649000	1684129900	978279700	35587200	56347400	66341040	184074200	516962400	151650880	27573200	49152210	0	0	4696590	0	0	601530	0	0	522660	2734500	567710690
DSTN	P60981;P60981-2	Destrin	0	0	0	0	0	0	0	0	0	0	0	0	0	0	0	0	0	0	0	544760	20001800	43825900	8701400	24791000	23679100	9552100	19518220	235188500	76216800	138339900	12132600	104423780	18503700	18767800	0	0	143627000	46499200	100572300	47522410	40463700	46507400	106708900	75633100	59423100	260361000	0
DTD1	Q8TEA8	D-aminoacyl-tRNA deacylase 1	0	0	0	0	0	0	0	0	0	0	0	0	0	0	0	0	0	0	0	17090000	8197100	0	13550000	0	9306900	6481900	11971000	7526700	4432100	13516200	3282400	18802900	3329400	3683300	0	0	30150800	7429600	15369900	91432000	14243300	69920000	43620000	31106200	17329600	72461100	0
DUSP3	P51452;P51452-2	Dual specificity protein phosphatase 3	0	0	0	0	0	0	0	0	0	0	0	0	0	0	0	0	0	0	0	0	0	0	0	0	0	0	0	0	0	0	0	0	0	0	0	0	1562300	0	8994360	4490880	21836000	11909800	2494400	0	13463900	1357400	0
DUT	P33316;P33316-2	Deoxyuridine 5`-triphosphate nucleotidohydrolase, mitochondrial	0	0	0	0	0	0	0	0	0	11946200	0	0	0	0	0	0	0	0	0	0	0	0	0	0	0	0	0	0	42876300	0	0	0	0	4271100	0	0	0	814160	0	0	0	0	0	0	0	316712000	0
DYNC1H1	Q14204	Cytoplasmic dynein 1 heavy chain 1	0	0	0	0	0	0	0	0	0	0	0	0	0	0	0	0	0	0	0	0	10230300	26698400	0	0	86328600	0	15816700	2725735500	229213750	2906515700	13998500	552999800	15427400	4727900	0	0	9628700	306770	4673230	8496540	3990220	74358680	2295250	0	292988500	161462480	0
DYNC1I1	O14576;O14576-2;O14576-3;O14576-4;O14576-5	Cytoplasmic dynein 1 intermediate chain 1	0	0	0	0	0	0	0	0	0	0	0	0	0	0	0	0	0	0	0	0	1033400	298520	0	0	10454400	0	0	40708000	6231700	46895900	0	13208700	2274300	0	0	0	0	0	0	0	0	0	0	0	0	0	0
DYNC1I2	Q13409;Q13409-2;Q13409-3;Q13409-5;Q13409-6;Q13409-7	Cytoplasmic dynein 1 intermediate chain 2	0	0	0	0	0	0	0	0	0	0	0	0	0	0	0	0	0	0	0	0	0	0	0	0	0	0	0	50563200	5130300	113235000	0	17482200	0	0	0	0	0	0	0	5265000	0	0	0	0	0	19550000	0
DYNC1LI2	O43237;O43237-2	Cytoplasmic dynein 1 light intermediate chain 2	0	0	0	0	0	0	0	0	0	0	0	0	0	0	0	0	0	0	0	0	1660900	0	0	1794900	0	685410	0	14318000	4083300	103550000	0	56536000	6430100	1808200	0	0	0	0	292330	685130	0	1980500	0	0	19231600	6132900	0
DYNLL1	P63167	Dynein light chain 1, cytoplasmic	0	0	0	0	0	0	0	0	0	0	0	0	0	0	0	0	0	0	0	14934200	42380500	39142400	53238000	38976000	48759500	32979600	12490100	162120000	27253000	168703000	27315700	138713000	29147100	24477500	14962400	1725800	27002700	19766000	39155300	49365000	45148700	31691800	54084000	17941200	40336500	233332000	0
DYNLRB1	Q9NP97;Q9NP97-2	Dynein light chain roadblock-type 1	0	0	0	0	0	0	0	0	0	0	0	0	0	0	0	0	0	0	0	0	7030700	5648000	0	0	10220000	0	0	177137900	2608400	135012000	0	77334000	0	12887000	0	0	0	0	0	0	0	0	0	0	0	0	0
EBI3	Q14213	Interleukin-27 subunit beta	0	0	0	0	0	0	0	0	0	0	0	0	0	0	0	0	0	0	0	0	0	0	0	0	0	0	0	0	0	0	0	0	0	0	0	0	53466500	22787830	10572000	199437000	6649300	315613000	63323000	59538500	27476600	3369000	0
ECH1	Q13011	Delta(3,5)-Delta(2,4)-dienoyl-CoA isomerase, mitochondrial	0	0	0	0	0	0	0	0	0	0	0	0	0	0	0	0	0	0	0	0	0	0	0	0	0	0	0	34327000	32246200	64238630	0	15971000	5453880	0	0	0	0	0	0	0	0	0	0	0	0	131583200	0
ECHDC1	Q9NTX5;Q9NTX5-2;Q9NTX5-3;Q9NTX5-6	Ethylmalonyl-CoA decarboxylase	0	0	0	0	0	0	0	0	0	0	0	0	0	0	0	0	0	0	0	0	0	0	0	0	0	0	0	0	0	0	0	0	0	0	0	0	0	0	1089200	4029500	2886500	29856100	0	0	9250200	4826420	0
ECHS1	P30084	Enoyl-CoA hydratase, mitochondrial	0	0	0	0	0	0	0	0	0	0	0	0	0	0	0	0	0	0	0	0	0	0	0	0	0	0	0	399613700	18697500	353087000	0	119587800	0	24553000	0	400640000	0	0	5346500	0	12268000	12111000	476210	0	14395800	52516700	0
ECM1	Q16610;Q16610-2;Q16610-3;Q16610-4	Extracellular matrix protein 1	2492868000	1229158700	423094000	1485137700	469822000	281495600	1718638000	705322900	176340000	234650900	48520000	970535200	177980900	329346200	1435963000	776614000	1681068200	793488100	790670200	2871740500	1591710900	370317000	5428311300	999871700	2404036600	2726575400	1024549500	393659800	167576600	262808000	555489500	2421455900	1052642100	553923800	1499200000	1500042300	3257852000	3225373300	1495599400	2429923900	1497814400	1655475600	2820468900	1335549600	1974123800	1993622000	916632400
ECM2	O94769;O94769-2	Extracellular matrix protein 2	362418600	185533200	208923400	29246400	187144400	68389000	283935000	163273900	54206100	15528000	0	221030200	35365900	0	346247200	240999000	431368000	138660200	375897200	300089300	527428900	144226300	290635800	335271500	247821100	415582900	196493200	32241600	6963400	3502800	125163800	207390300	192991700	143908300	280603800	388776700	11222945200	9268248000	6015772600	13387167900	5741302100	8032324900	15438627400	12073320300	4667268200	346881840	9949100
ECPAS	Q5VYK3	Proteasome adapter and scaffold protein ECM29	0	0	0	0	0	0	0	0	0	0	0	0	0	0	0	0	0	0	0	0	0	0	0	0	0	0	0	0	0	0	0	0	0	0	0	0	5319700	9602400	32230000	30333000	49068000	9411100	40353000	97126000	10091000	5044300	0
ECRG4	Q9H1Z8	Augurin	109899000	53264000	91382000	6251700	272708000	13799000	99835000	46748000	38798000	138408000	27591000	52750000	19319000	208791000	47611000	36674000	62090000	117003000	124280000	75546000	62161600	103950000	127761000	154433700	67857000	134466700	36910800	36347000	24155490	53430000	19107000	90968000	35580000	13797000	49759380	88350800	17893600	3842900	48233000	38546000	27234000	2318400	32854700	21986900	1027900	0	0
EDA	Q92838;Q92838-3;Q92838-9	Ectodysplasin-A	0	0	0	0	0	0	0	0	0	0	0	0	0	0	0	0	0	0	0	0	0	0	0	0	0	0	0	0	0	0	0	0	0	0	0	0	44353800	23062500	7870600	46197800	10316000	30592200	48251100	26679000	10452200	0	0
EDF1	O60869;O60869-2;O60869-3	Endothelial differentiation-related factor 1	0	0	0	0	0	0	0	0	0	0	0	0	0	0	0	0	0	0	0	0	0	0	0	0	0	0	0	0	22109400	0	0	7903200	0	0	0	0	1452900	184230	3986100	0	1950000	11253280	4929700	2291900	6474270	175040000	0
EDIL3	O43854;O43854-2	EGF-like repeat and discoidin I-like domain-containing protein 3	0	0	0	0	0	0	0	0	0	0	0	0	0	0	0	0	0	0	0	38903000	24294700	78335600	0	48293100	11353000	16380700	57702100	22674100	0	6853400	9576000	11426000	2160200	7775200	25082400	13060000	237038400	206119100	225436050	67880980	298043100	122601900	147451700	233118430	44083810	758360	0
EDN1	P05305	Endothelin-1	0	0	0	0	0	0	0	0	0	0	0	0	0	0	0	0	0	0	0	0	0	0	0	0	0	0	0	0	0	0	0	0	0	0	0	0	12785100	2317100	19173300	21491600	6094900	12178700	18097500	4726900	3781900	0	0
EEA1	Q15075	Early endosome antigen 1	0	0	0	0	0	0	0	0	0	0	0	0	0	0	0	0	0	0	0	0	0	0	0	0	0	0	0	0	0	0	0	0	0	0	0	0	4872600	0	1094100	5111700	0	6893440	0	0	2961430	169769400	0
EEF1A1	P68104	Elongation factor 1-alpha 1	0	0	0	0	0	0	0	0	2114750	138792256	2361800	0	0	31303145	0	39083000	0	7219300	0	34632299	540019244	532618013	86179795	104148716	133344213	44254152	129408679	1444341500	372756761	1084220951	58429602	516236295	242112977	186212287	41965311	147128608	23892939	74247654	319800190	267810292	109808375	329597211	230075163	33242584	1543225579	2986840047	5644000
EEF1A2	Q05639	Elongation factor 1-alpha 2	0	0	0	0	0	0	0	0	2114750	13403744	2361800	0	0	135755	0	0	0	0	0	31263201	117191456	125846287	25689205	46931884	37574487	18207848	49571121	514551500	189284939	229391749	29884198	150196585	106824023	85512913	15208989	18709892	13171181	33770446	93002710	86086608	46148625	211281489	43995637	16267216	263778421	446966753	5644000
EEF1B2	P24534	Elongation factor 1-beta	0	0	0	0	0	0	0	0	0	0	0	0	0	0	0	0	0	0	0	0	4056000	0	0	0	0	0	0	25126300	62827000	8545700	0	8764600	5237100	8405400	0	0	0	0	19677854	19986253	27832684	158996023	35933784	0	79888669	929853178	0
EEF1D	P29692;P29692-2;P29692-3;P29692-4	Elongation factor 1-delta	0	0	0	0	0	0	0	0	0	13226700	0	0	0	0	0	0	0	0	0	0	4739700	0	0	0	9227700	0	2357600	51376000	79108900	39853000	2823800	23508900	11499100	31064000	0	0	0	0	7865946	55563947	4730716	121472677	24853416	1693750	86298031	395684922	0
EEF1G	P26641;P26641-2	Elongation factor 1-gamma	0	0	0	0	0	0	0	0	0	15467200	0	0	0	0	0	0	0	0	0	0	3346400	8792670	0	0	0	0	0	39836700	42999700	11456000	0	12077600	5807000	6732300	0	0	164960	0	26428800	21141500	31463690	168696600	22082440	1251300	119888900	482610400	0
EEF2	P13639	Elongation factor 2	0	0	0	0	0	0	0	0	0	175158300	0	0	0	10722000	0	0	0	0	0	0	131529200	79227600	7571500	12744000	22060000	8156000	19858100	244930200	864461200	373810900	18835400	54954000	99342300	270390000	0	0	15106100	11069390	157817138	22606990	286047426	323322360	210283600	24072930	282316050	6128118555	0
EFCAB14	O75071	EF-hand calcium-binding domain-containing protein 14	86771000	27150300	11826000	95388000	48158000	44643600	53010100	28992000	31118400	0	0	54999000	12535000	0	33062900	58195000	71800000	32380000	14148000	153664600	66952000	24553800	273938000	131722100	255795000	132650900	61368400	0	13870200	2409100	69646000	159681000	70335600	62840500	104257600	82243600	532132700	343220000	268506100	392248000	634142000	216366400	477324000	380395000	267427000	92474300	55701300
EFEMP1	Q12805;Q12805-2;Q12805-3;Q12805-4;Q12805-5	EGF-containing fibulin-like extracellular matrix protein 1	8920880000	8731806000	6764601400	11509552500	6325524000	1686801800	8215489000	7493097000	4177253000	1256719100	187627900	6587363500	3870358900	4451623600	9768492900	9212431600	8648512000	9483167000	8126637200	8167231100	7357954800	4363388900	16353459000	6931427200	10348802200	9474549700	7670446500	2895351000	816760200	1422554800	3599031100	16484413000	7366431100	4353801300	7772939900	11873253600	24177208300	29753649000	26369565600	20623821200	30020623000	14718335900	19487122500	24440794000	28751365000	14375643800	3087397600
EFEMP2	O95967	EGF-containing fibulin-like extracellular matrix protein 2	183219200	131575000	67392300	85561000	110465000	39688000	69923000	95310000	37029900	0	0	119395000	37716300	29119300	180375000	212028000	197985000	112555700	89547000	94534800	168133000	41169700	186003000	57408300	94220000	113026100	73467400	5654400	0	0	52937600	134541200	77758500	38020900	112035800	76228000	2149942600	1683402000	1138844800	1948768000	1488235300	1041776700	3010131000	1682740800	1168042800	248579300	7907600
EFHD2	Q96C19	EF-hand domain-containing protein D2	0	0	0	0	0	0	0	0	0	0	0	0	0	0	0	0	0	0	0	0	0	1720800	0	0	0	0	0	32263000	26208400	31285400	2951200	10981600	0	3026100	0	0	16196200	0	19756800	23436500	12566600	16908400	28116400	15575200	25644580	123289200	0
EFNA1	P20827;P20827-2	Ephrin-A1	13429000	0	0	0	0	6250300	36582000	0	0	0	0	4143600	0	0	32638000	7084300	18735000	0	0	20197400	31199000	0	35898000	9379300	79756000	20919000	2043300	0	1778400	0	5713900	6987900	3776100	0	23127000	3891700	0	0	0	0	0	0	0	0	0	0	0
EFNA3	P52797;P52797-2	Ephrin-A3	21498000	0	9968500	37488000	14191000	38215000	59054000	0	0	0	0	11757000	0	13515000	32916000	0	10851000	8443000	0	13196000	10205000	0	56313000	0	46902000	28034000	5854100	0	0	0	0	40396000	49804000	0	24435580	0	0	0	0	0	0	0	0	0	0	0	0
EFNA5	P52803	Ephrin-A5	15997000	0	0	0	0	0	0	0	0	0	0	0	0	6458900	25877000	0	32389100	0	0	0	0	0	0	0	0	0	0	0	0	0	0	0	0	0	0	0	0	0	0	0	0	0	0	0	0	0	0
EFNB1	P98172	Ephrin-B1	6638300	0	16482000	49027000	0	16520200	22409000	0	0	0	0	0	12817000	0	54653000	6901000	21012000	19802000	0	0	0	0	0	0	0	0	0	0	0	0	0	0	0	0	0	0	0	0	0	0	0	0	0	0	0	0	0
EFNB2	P52799	Ephrin-B2	33013000	0	0	40570000	0	0	10749000	0	0	0	0	21116400	0	0	35604500	0	39257300	304940	0	46103100	23425000	3525600	120149000	26875000	73745000	86316740	8761930	0	3431300	0	4486000	64503000	18509300	2341900	24527000	35077000	0	0	0	0	0	0	0	0	0	0	0
EFTUD2	Q15029;Q15029-2;Q15029-3	116 kDa U5 small nuclear ribonucleoprotein component	0	0	0	0	0	0	0	0	0	0	0	0	0	0	0	0	0	0	0	0	0	0	0	0	0	0	0	0	0	0	0	0	0	0	0	0	27761000	29153000	24232022	18701000	21002554	23611000	25694000	12200000	25890000	16648145	0
EGFLAM	Q63HQ2;Q63HQ2-2;Q63HQ2-3;Q63HQ2-4;Q63HQ2-5	Pikachurin	0	0	0	0	0	0	0	0	0	0	0	0	0	0	0	0	0	0	0	0	0	0	0	0	0	0	0	0	0	0	0	0	0	0	0	0	270308900	364053300	59967700	314402800	55432980	178091940	385767430	78467800	5358300	0	0
EGFR	P00533;P00533-2;P00533-3;P00533-4	Epidermal growth factor receptor	0	0	0	0	0	0	0	0	0	0	0	0	0	0	0	0	7576100	0	0	0	0	0	0	0	0	0	0	0	0	0	0	0	0	0	0	0	0	0	0	0	0	0	0	0	0	0	0
EHD1	Q9H4M9	EH domain-containing protein 1	0	0	0	0	0	0	0	0	0	0	0	0	0	0	0	0	0	0	0	0	16007822	2531950	3768300	0	2163700	0	0	72165581	17094176	199752416	0	7998095	0	1545400	0	0	37358049	23362536	28392180	25326486	34746785	86523453	34657679	18217600	115462794	103073406	0
EHD2	Q9NZN4;Q9NZN4-2	EH domain-containing protein 2	0	0	0	0	0	0	0	0	0	0	0	0	0	0	0	0	0	0	0	0	0	0	0	0	0	0	0	0	0	0	0	0	0	0	0	0	3855700	95832	3001100	8110600	2349100	5644807	12378000	1875069	1781492	433145	0
EHD3	Q9NZN3;Q9NZN3-2	EH domain-containing protein 3	0	0	0	0	0	0	0	0	0	0	0	0	0	0	0	0	0	0	0	0	484878	2531950	3768300	0	2163700	0	0	38339219	4986324	58728684	0	12367305	0	1545400	0	0	23921	95832	4360	42514	238835	853620	265221	1388111	3314314	1959168	0
EIF1AX	P47813	Eukaryotic translation initiation factor 1A, X-chromosomal	0	0	0	0	0	0	0	0	0	0	0	0	0	0	0	0	0	0	0	0	0	0	0	0	0	0	0	0	0	0	0	0	0	0	0	0	1590700	0	11636300	26000600	6423300	54131100	5492100	1792400	130751300	201301000	0
EIF1;EIF1B	P41567;O60739	Eukaryotic translation initiation factor 1; Eukaryotic translation initiation factor 1b	0	0	0	0	0	0	0	0	0	0	0	0	0	0	0	0	0	0	0	0	0	0	0	0	0	0	0	0	0	0	0	0	0	0	0	0	0	762230	3898400	1866500	16359300	19794900	3126200	0	18573000	64621700	0
EIF2A	Q9BY44;Q9BY44-2;Q9BY44-3;Q9BY44-4	Eukaryotic translation initiation factor 2A	0	0	0	0	0	0	0	0	0	0	0	0	0	0	0	0	0	0	0	0	0	0	0	0	0	0	0	0	0	0	0	0	0	0	0	0	0	0	0	0	0	0	0	0	796620	10411660	0
EIF2S1	P05198	Eukaryotic translation initiation factor 2 subunit 1	0	0	0	0	0	0	0	0	0	0	0	0	0	0	0	0	0	0	0	0	0	0	0	0	0	0	0	0	0	0	0	0	0	0	0	0	0	0	1299600	28892300	2337530	80451600	0	0	112787000	98400300	0
EIF2S2	P20042	Eukaryotic translation initiation factor 2 subunit 2	0	0	0	0	0	0	0	0	0	0	0	0	0	0	0	0	0	0	0	0	0	0	0	0	0	0	0	0	0	0	0	0	0	0	0	0	0	0	0	4941800	0	51808600	0	0	24701300	39579200	0
EIF2S3	P41091	Eukaryotic translation initiation factor 2 subunit 3	0	0	0	0	0	0	0	0	0	0	0	0	0	0	0	0	0	0	0	0	0	0	0	0	0	0	0	0	0	0	0	0	0	0	0	0	0	0	2140020	46665700	980520	70772900	783340	0	125027400	159362300	0
EIF3A	Q14152;Q14152-2	Eukaryotic translation initiation factor 3 subunit A	0	0	0	0	0	0	0	0	0	0	0	0	0	0	0	0	0	0	0	0	0	0	0	0	0	0	0	0	4700200	0	0	0	0	2445800	0	0	0	0	1185950	1950100	178770	6605130	0	0	7326950	38936700	0
EIF3B	P55884;P55884-2	Eukaryotic translation initiation factor 3 subunit B	0	0	0	0	0	0	0	0	0	0	0	0	0	0	0	0	0	0	0	0	0	0	0	0	0	0	0	0	0	0	0	0	0	0	0	0	0	0	0	4727400	0	11614550	759130	0	8255100	163684800	0
EIF3D	O15371;O15371-2;O15371-3	Eukaryotic translation initiation factor 3 subunit D	0	0	0	0	0	0	0	0	0	0	0	0	0	0	0	0	0	0	0	0	0	0	0	0	0	0	0	0	0	0	0	0	0	0	0	0	0	0	2881600	0	0	0	0	0	1615100	22841700	0
EIF3F	O00303	Eukaryotic translation initiation factor 3 subunit F	0	0	0	0	0	0	0	0	0	0	0	0	0	0	0	0	0	0	0	0	0	0	0	0	0	0	0	0	0	0	0	0	0	0	0	0	0	0	0	0	0	5367400	0	0	4809300	14856000	0
EIF3G	O75821	Eukaryotic translation initiation factor 3 subunit G	0	0	0	0	0	0	0	0	0	0	0	0	0	0	0	0	0	0	0	0	0	0	0	0	0	0	0	0	0	0	0	0	0	0	0	0	64308000	110730000	117300000	98463000	85005160	47253000	189807280	46932000	36184800	88058100	0
EIF3I	Q13347	Eukaryotic translation initiation factor 3 subunit I	0	0	0	0	0	0	0	0	0	0	0	0	0	0	0	0	0	0	0	0	0	0	0	0	0	0	0	0	0	0	0	0	0	0	0	0	0	0	0	0	0	0	0	0	1155100	17229700	0
EIF3L	Q9Y262;Q9Y262-2	Eukaryotic translation initiation factor 3 subunit L	0	0	0	0	0	0	0	0	0	0	0	0	0	0	0	0	0	0	0	0	0	0	0	0	0	0	0	0	0	0	0	0	0	0	0	0	31546000	0	33707000	0	46730000	0	0	0	579630	15951300	0
EIF4A1	P60842;P60842-2	Eukaryotic initiation factor 4A-I	0	0	0	0	0	0	0	0	0	0	0	0	0	0	0	0	0	0	0	0	0	0	0	0	0	0	0	43544438	8495444	27994081	0	10859700	721102	8701617	0	0	8223250	1891732	22297502	34626989	46808467	139265500	50496348	4090559	232144013	132624573	0
EIF4A2	Q14240;Q14240-2	Eukaryotic initiation factor 4A-II	0	0	0	0	0	0	0	0	0	0	0	0	0	0	0	0	0	0	0	0	0	2473700	0	0	20860000	0	0	61613862	32261756	49905919	4202600	10859700	10927998	25535383	0	0	8223250	4509568	22533033	36946983	41929837	134868011	53693514	7752541	141035833	137417277	0
EIF4A3	P38919	Eukaryotic initiation factor 4A-III	0	0	0	0	0	0	0	0	0	0	0	0	0	0	0	0	0	0	0	0	0	0	0	0	0	0	0	0	0	0	0	0	0	0	0	0	0	0	60365	830328	208596	810929	136438	0	1493554	42729319	0
EIF4B	P23588;P23588-2	Eukaryotic translation initiation factor 4B	0	0	0	0	0	0	0	0	0	0	0	0	0	0	0	0	0	0	0	0	0	0	0	0	0	0	0	0	0	0	0	0	0	0	0	0	0	0	0	1045960	0	9073500	0	0	19477560	166675100	0
EIF4E	P06730;P06730-2;P06730-3	Eukaryotic translation initiation factor 4E	0	0	0	0	0	0	0	0	0	0	0	0	0	0	0	0	0	0	0	0	0	0	0	0	0	0	0	0	0	0	0	0	0	0	0	0	0	0	449610	8662500	672930	16783000	0	0	57029000	53290900	0
EIF4H	Q15056;Q15056-2	Eukaryotic translation initiation factor 4H	0	0	0	0	0	0	0	0	0	0	0	0	0	0	0	0	0	0	0	0	0	0	0	0	0	0	0	48208000	49804000	72093000	0	30326000	0	0	0	0	4273500	0	3945900	15194900	0	60698000	12850000	6340700	10324000	215840000	0
EIF5	P55010	Eukaryotic translation initiation factor 5	0	0	0	0	0	0	0	0	0	0	0	0	0	0	0	0	0	0	0	0	0	0	0	0	0	0	0	0	0	0	0	0	0	0	0	0	0	103050	1345940	13366520	317610	57994700	0	0	91427300	94742500	0
EIF5A	P63241;P63241-2	Eukaryotic translation initiation factor 5A-1	0	0	0	0	0	0	0	0	22970400	84086000	8594600	0	0	0	0	11283000	0	0	0	0	7270600	0	0	0	32677000	0	1483900	45146000	49926000	77797000	2070000	24179000	10268000	35565000	0	0	6455300	4232400	42664500	157671200	62935200	457491000	83401200	23661780	783676000	1078747000	0
EIF5B	O60841	Eukaryotic translation initiation factor 5B	0	0	0	0	0	0	0	0	0	0	0	0	0	0	0	0	0	0	0	0	0	0	0	0	0	0	0	0	0	0	0	0	0	0	0	0	0	0	0	0	0	0	0	0	3790100	76614600	0
EIF6	P56537;P56537-2	Eukaryotic translation initiation factor 6	0	0	0	0	0	0	0	0	0	0	0	0	0	0	0	0	0	0	0	0	0	0	0	0	0	0	0	0	0	0	0	0	0	0	0	0	0	1876100	0	12164900	27775300	64925700	28256500	0	62025600	274247100	0
ELANE	P08246	Neutrophil elastase	0	0	0	0	0	0	0	0	0	0	0	0	33366300	0	0	0	0	0	0	0	0	1408600	0	0	2198000	0	0	91811000	0	20350000	0	0	0	0	0	0	0	0	0	0	0	0	0	0	0	0	0
ELAVL1	Q15717;Q15717-2	ELAV-like protein 1	0	0	0	0	0	0	0	0	0	0	0	0	0	0	0	0	0	0	0	0	0	0	0	0	0	0	0	0	0	0	0	0	0	0	0	0	0	0	295800	0	0	0	0	0	0	98756700	0
ELFN2	Q5R3F8	Protein phosphatase 1 regulatory subunit 29	0	0	0	0	0	0	0	0	0	0	0	0	0	0	0	0	0	0	0	0	0	0	0	0	0	0	0	0	0	0	0	0	0	0	0	0	35768000	17008000	8723900	36461000	28703400	0	56253000	11476000	13244500	5406800	0
ELL3	Q9HB65;Q9HB65-2	RNA polymerase II elongation factor ELL3	0	0	0	0	0	0	0	0	0	0	0	0	0	0	0	0	0	0	0	0	0	0	0	0	0	0	0	0	0	0	0	0	0	0	0	0	6984800	163232100	3199600	18918000	22673000	8810800	10169000	255330000	73204000	8191300	0
ELN	P15502;P15502-1;P15502-10;P15502-11;P15502-12;P15502-13;P15502-2;P15502-4;P15502-5;P15502-6;P15502-7;P15502-8;P15502-9	Elastin	53219400	9409300	3571400	0	11041000	18100800	12091200	0	0	0	0	7320600	0	0	8204300	0	20586000	0	7112500	19994800	55059000	7196500	31722000	13116000	25689000	59160000	15597300	0	0	0	0	58250800	14877000	7304800	15095000	35684500	477583000	265422700	187053300	429179000	128714400	222386200	381282900	265249900	73912970	449170	0
ELOB	Q15370;Q15370-2	Elongin-B	0	0	0	0	0	0	0	0	0	0	0	0	0	0	0	0	0	0	0	0	0	14791000	0	0	0	0	0	96883100	18852100	105036000	12639000	44483200	23319000	37341500	0	0	0	0	0	9261900	1307150	3144000	0	0	16865100	64407900	0
ELOC	Q15369;Q15369-2	Elongin-C	0	0	0	0	0	0	0	0	0	0	0	0	0	0	0	0	0	0	0	0	0	0	0	0	0	0	0	0	0	0	0	0	0	0	0	0	0	0	3039800	0	0	3644200	8639500	0	10357000	23226800	0
EMILIN1	Q9Y6C2;Q9Y6C2-2	EMILIN-1	0	0	0	0	0	0	0	0	0	0	0	0	0	0	0	0	0	0	0	61287400	43484000	12233800	217116200	2066900	77948600	54690430	35091700	3118800	1523900	707620	11393000	70960000	0	15403800	29251000	44251000	111618100	113464900	92204800	216689100	85063000	76473200	125793200	69428100	34093200	505830	0
EMILIN2	Q9BXX0	EMILIN-2	0	0	0	0	0	0	0	0	0	0	0	0	0	0	0	0	0	0	0	0	0	0	0	0	0	0	0	0	0	0	0	0	0	0	0	0	197047100	180667970	118233310	1392143400	173181020	1901590000	515311250	152568190	41731340	70859350	0
EMILIN3	Q9NT22;Q9NT22-2	EMILIN-3	0	0	0	0	0	0	0	0	0	0	0	0	0	0	0	0	0	0	0	5232300	12594900	24596000	0	3012300	0	4689800	5088600	14214000	1070200	0	5324700	7464200	0	62639500	34085000	1287200	56018600	47547400	54836120	156480400	45378900	20233700	91560600	83580400	23483100	2494100	0
EML2	O95834;O95834-2;O95834-3	Echinoderm microtubule-associated protein-like 2	0	0	0	0	0	0	0	0	0	0	0	0	0	0	0	0	0	0	0	0	0	0	0	0	0	0	0	0	0	0	0	0	0	0	0	0	4074200	0	0	0	0	0	0	0	327900	39331300	0
ENDOD1	O94919	Endonuclease domain-containing 1 protein	679007000	427571000	296766300	775215000	249288900	145531000	570379000	373161700	151353700	180893800	5488900	395696900	121358700	200298100	827163000	415884000	696309000	607093500	338088000	727202000	470331800	240074400	1436852000	410553900	1231261600	845560200	308430500	735680600	213656400	673045600	442264500	832339600	607165300	352947700	537684000	380615200	22446600	97718150	29886000	3112610	51763800	14122900	7199200	16357650	38113700	462873800	297865300
ENO1	P06733;P06733-2	Alpha-enolase	144554493	9420200	67459648	139386538	152688000	489668000	194002124	76043000	310050335	3278474851	552668300	112069479	159899351	2207814662	183511000	440480571	90092521	98461056	147133117	1642285920	2330343568	1551751893	2502668111	1921874501	7192549707	1636068836	1545175305	8526500115	7059134518	8596337158	2900556912	10173826248	4309338663	5126541391	642379877	1369310547	1602219072	1379989300	1045521832	2971073759	2442806220	3793008843	2451871794	1789114238	2633361954	21152869781	126828481
ENO2	P09104;P09104-2	Gamma-enolase	113543546	48499000	57753167	74120431	59505600	213313800	197533789	100975175	31768229	186326066	202515026	132499386	24399396	218962099	134646233	35153711	114111669	24421512	34054533	433530444	323091013	115960238	266576317	285715024	712985193	389778393	220291557	2660582740	1166336409	1409216345	376346012	1120781857	302212415	278503921	228478455	101223660	622612634	641034214	350842385	329280682	1183576789	479030484	563524910	721320907	560644424	2202294677	139996433
ENO3	P13929;P13929-2;P13929-3	Beta-enolase	4601011	0	1032785	3115831	0	0	4732087	450325	3195436	16080483	271874	5448335	2910354	6518639	2897367	2696418	7363411	1398832	2382350	22950036	44447819	17467469	54735572	15008676	301764600	28635870	77978547	363161746	273428875	270214498	35399746	242501394	75769622	49155989	9954968	14757093	31356394	19950286	14568182	27769460	31022891	54731773	28946696	41685155	45650722	229014541	7917886
ENOPH1	Q9UHY7;Q9UHY7-2	Enolase-phosphatase E1	0	0	0	0	0	23192200	0	0	0	4135500	0	0	0	4268000	0	0	0	0	0	0	16605000	8906500	0	0	27824000	3817100	4053900	76150000	21076100	89914000	5712800	30243200	17175600	6792700	0	3458000	108405000	30790700	117646600	134582900	256352000	378315900	210450400	244341000	160252000	440409000	0
ENPP2	Q13822;Q13822-2;Q13822-3	Ectonucleotide pyrophosphatase/phosphodiesterase family member 2	8215731000	11751777400	17872397000	4662575000	9415959200	3962660500	10733004000	6508183000	7547998000	9073408300	2911039000	7786544700	4786148500	10380324200	11393095700	9656010000	10869295500	17387557800	11442512000	5900505600	9471730000	8965233400	4284241800	8824676300	7770843000	8629828000	4569369400	5426772200	3092118700	3206160000	3518491400	6155518500	6871768900	4710063000	6048545800	6908383500	11209343100	29933933870	24764296700	3186682480	11931762360	11403470720	7458420210	9235612000	20794855100	34833748310	846919300
ENPP6	Q6UWR7	Glycerophosphocholine cholinephosphodiesterase ENPP6	0	0	0	0	0	0	0	0	0	0	0	0	0	0	0	0	0	0	0	0	13994400	3999500	7624400	0	0	4945600	1520100	901366800	1844000	1207383100	63184100	96185500	20061710	70515600	12310800	0	10138700	10776300	25101700	6790100	34522600	5560600	4188500	3278320	0	267120	0
ENSA	O43768;O43768-2;O43768-3;O43768-4;O43768-5;O43768-6;O43768-7;O43768-8;O43768-9	Alpha-endosulfine	0	0	0	0	0	0	0	0	0	17592900	0	0	0	0	0	0	0	0	0	0	698820	0	2072100	0	1441000	0	0	18660300	9111400	0	0	2242100	0	0	0	0	0	0	0	0	0	0	0	0	5753073	109230607	0
ENTPD2	Q9Y5L3;Q9Y5L3-2;Q9Y5L3-3	Ectonucleoside triphosphate diphosphohydrolase 2	0	0	0	0	0	0	0	0	0	0	0	0	0	0	0	0	0	0	0	0	0	0	0	0	0	0	0	77610000	0	3963600	2477200	0	0	3403100	2031700	0	0	0	0	0	0	0	0	0	0	0	0
ENTPD6	O75354;O75354-2;O75354-3	Ectonucleoside triphosphate diphosphohydrolase 6	0	0	0	0	0	0	0	0	0	0	0	0	0	0	0	0	0	0	0	0	0	0	0	0	0	0	0	0	0	0	0	0	0	0	0	0	277298000	138470500	52128200	80238730	115226300	65652880	65279260	119212700	66013220	1113210	0
EPB41	P11171;P11171-2;P11171-3;P11171-4;P11171-5;P11171-6;P11171-7	Protein 4.1	0	0	0	0	0	0	0	0	13375700	0	17663800	0	0	0	0	10744000	0	0	0	0	76581000	0	1156982759	0	4497618444	0	32876700	5930255552	39536632	11562421182	441462797	737944633	19937520	1076996346	0	0	0	0	0	114004752	0	552542813	0	337580	1138883113	1286990	0
EPB41L1	Q9H4G0;Q9H4G0-2;Q9H4G0-3;Q9H4G0-4	Band 4.1-like protein 1	0	0	0	0	0	0	0	0	0	0	0	0	0	0	0	0	0	0	0	0	0	0	113120	0	1513181	0	0	33682631	5728721	18745697	0	2787842	0	0	0	0	0	0	0	52848	0	959716	0	0	3015001	0	0
EPB41L2	O43491;O43491-2;O43491-3;O43491-4	Band 4.1-like protein 2	0	0	0	0	0	0	0	0	0	0	0	0	0	0	0	0	0	0	0	0	9754200	226570	0	0	229640	0	1047700	552511524	34373400	808521397	9804700	116451171	0	2311500	0	0	2502190	8442100	43645600	47662900	55313450	76520746	22322990	7077400	23331300	33585810	0
EPB41L3	Q9Y2J2;Q9Y2J2-2;Q9Y2J2-3;Q9Y2J2-4	Band 4.1-like protein 3	0	0	0	0	0	0	0	0	0	0	0	0	0	0	0	0	0	0	0	0	9687700	0	113120	0	6594875	0	0	813338994	146238547	694234124	7455203	180139794	0	65454	0	0	1328500000	1373900000	1042140100	851645500	1259742600	1477189325	1512566360	1244929200	1043194986	217030200	0
EPB42	P16452;P16452-2;P16452-3	Protein 4.2	0	0	0	0	0	0	0	0	0	0	0	0	0	0	0	0	0	0	0	0	4971600	0	903960400	0	4934382800	0	5540740	5963090401	7053000	14958025337	516015200	358166400	11847400	977302000	0	0	20230	0	14585	231230771	32562	837768017	25914	2248100	900533400	7325	0
EPDR1	Q9UM22;Q9UM22-2;Q9UM22-3	Mammalian ependymin-related protein 1	52673000	0	17948000	0	36841000	0	58421000	0	29894000	23560000	0	0	9250100	26067000	43091000	19995000	106447000	0	0	83515000	37382800	10070900	46435000	11042000	70929000	75527000	17156900	89523000	0	18353000	1883500	21362000	16625600	0	89562700	41512000	23869900	33886990	18483200	3934400	62322200	26932590	53998100	4698660	14351200	18087210	0
EPHA10	Q5JZY3;Q5JZY3-2;Q5JZY3-3	Ephrin type-A receptor 10	0	0	0	0	0	0	0	0	0	0	0	0	0	0	0	0	0	0	0	18502200	0	1262700	42502000	0	25546000	0	0	0	0	0	0	5076400	0	0	21428300	0	35043046	7906935	6744203	44995665	24988535	14283560	11010803	231504	11495910	27725468	0
EPHA4	P54764;P54764-2	Ephrin type-A receptor 4	1110498000	392355000	298974400	1668721000	499160300	366735000	1202916000	210097200	186147400	182425900	7247200	437436200	134107400	268893400	827295000	398577500	1106680000	545330300	377924400	898920700	277185600	125988000	1970296000	459630900	697967000	1119678000	229146800	31276000	59448600	15900900	133479800	872664700	420805700	181075300	781754200	207748000	896703000	424770100	246956030	501727600	638760030	248217300	742572300	217795800	293388000	1033447000	139633300
EPHA5	P54756;P54756-2;P54756-3	Ephrin type-A receptor 5	0	12045000	0	27800000	17068000	0	51934000	0	0	0	0	0	0	0	38732000	0	0	5728100	0	0	0	0	0	0	0	0	0	0	0	0	0	0	0	0	0	0	55047206	14420894	960240	3250600	21084000	14534000	32916000	8783000	15669985	31850763	0
EPHA7	Q15375;Q15375-2;Q15375-3;Q15375-4;Q15375-5	Ephrin type-A receptor 7	0	0	0	0	0	0	0	0	0	0	0	0	0	0	0	0	0	0	0	0	0	0	0	0	0	0	0	0	0	0	0	0	0	0	0	0	29534548	56003071	21418697	6128435	38587335	0	3761697	11231696	27521705	49774469	0
EPHB2	P29323;P29323-2;P29323-3	Ephrin type-B receptor 2	0	0	4101300	4915400	4603500	0	12923400	0	0	0	0	0	0	0	0	4833100	394110000	0	0	0	0	0	0	0	0	0	0	0	0	0	0	0	0	0	0	0	12423700	14837200	7608600	5823400	10186400	4342200	7335800	6674200	11498900	11905200	0
EPHB6	O15197;O15197-2;O15197-3	Ephrin type-B receptor 6	14995000	6758600	6198700	96561000	7721900	0	23485900	0	0	0	0	5511500	0	3083100	28398500	0	27745400	8072400	0	20624000	7754400	4063700	130260000	6925000	24708000	0	0	0	682820	0	1110700	69103000	8271600	6811000	0	0	319024200	141422500	87532800	241019300	126386030	77708700	256410500	51964900	60024600	51427170	0
EPHX1	P07099	Epoxide hydrolase 1	0	0	0	0	0	0	0	0	0	0	0	0	0	0	0	0	0	0	0	0	0	0	0	0	8419200	0	0	256184000	1276900	54489000	1669400	0	23959600	4007600	0	0	0	0	0	0	0	0	0	0	24163500	0	0
EPPK1	P58107	Epiplakin	0	0	0	0	0	0	0	0	0	0	0	0	0	0	0	0	0	0	0	0	0	0	0	0	0	0	0	0	0	0	0	0	0	0	0	0	0	0	0	445199	58429	1881846	1091351	0	982787	0	0
EPRS1	P07814	Bifunctional glutamate/proline--tRNA ligase	0	0	0	0	0	0	0	0	0	0	0	0	0	0	0	0	0	0	0	0	0	0	0	0	0	0	0	0	0	0	0	0	0	0	0	0	0	0	0	0	0	17914000	151710	5415700	36356730	263055900	0
EPS15	P42566;P42566-2	Epidermal growth factor receptor substrate 15	0	0	0	0	0	0	0	0	0	0	0	0	0	0	0	0	0	0	0	0	0	0	0	0	0	0	0	0	0	0	0	0	0	0	0	0	0	0	0	944050	0	2183800	0	0	2872100	23494900	0
EPS15L1	Q9UBC2;Q9UBC2-2;Q9UBC2-3;Q9UBC2-4	Epidermal growth factor receptor substrate 15-like 1	0	0	0	0	0	0	0	0	0	0	0	0	0	0	0	0	0	0	0	0	0	0	0	0	0	0	0	0	0	0	0	0	0	0	0	0	0	0	0	7191200	244720	3148500	0	0	2972910	39654400	0
ERH	P84090	Enhancer of rudimentary homolog	0	0	0	0	0	0	0	0	0	94903000	0	0	0	0	0	0	0	0	0	0	0	4026100	0	0	0	0	0	0	110440400	0	1519800	0	0	23625000	0	0	1905600	0	15310800	36326000	39396700	70668000	21025300	0	15368100	870570000	0
ERLIN2	O94905;O94905-2;O94905-3	Erlin-2	0	0	0	0	0	0	0	0	0	0	0	0	0	0	0	0	0	0	0	0	0	0	0	0	0	0	0	371874000	971430	56323000	0	20589100	15988200	0	0	0	0	0	0	0	0	0	0	0	0	0	0
ERMAP	Q96PL5	Erythroid membrane-associated protein	0	0	0	0	0	0	0	0	0	0	0	0	0	0	0	0	0	0	0	0	0	0	0	0	50748000	0	0	91761000	0	203924200	0	0	0	0	0	0	0	0	0	0	0	0	0	0	0	0	0
ERMN	Q8TAM6;Q8TAM6-2	Ermin	0	0	0	0	0	0	0	0	0	0	0	0	0	0	0	0	0	0	0	8238170	45894000	74915400	0	33291000	0	0	55385500	388275100	6857200	330940800	6598400	140348700	29140000	4797500	0	7196100	0	0	0	0	0	0	0	0	0	0	0
ERP29	P30040;P30040-2	Endoplasmic reticulum resident protein 29	0	0	0	0	0	0	0	0	0	0	0	0	0	0	0	0	0	0	0	0	9255100	12923000	0	0	15147000	0	0	51721000	11051200	48065600	0	5736900	4495200	18083100	0	0	0	0	0	0	3669300	13668200	0	0	9893000	177154800	0
ERP44	Q9BS26	Endoplasmic reticulum resident protein 44	0	0	0	0	0	0	0	0	0	0	0	0	0	0	0	0	0	0	0	0	0	0	0	0	34127000	0	0	57480200	6453600	31819000	3927300	0	454530	955950	0	0	130818000	99007700	65235000	78385500	121002500	82522200	130220700	97734400	80628900	65831200	0
ESAM	Q96AP7	Endothelial cell-selective adhesion molecule	18127300	4885900	6749300	42939000	0	8156100	19248000	7660200	0	0	0	13913000	0	0	26028100	17444000	6678800	0	0	0	0	0	0	0	0	0	0	0	0	0	0	0	0	0	0	0	0	0	0	0	0	0	0	0	0	0	0
ESD	P10768	S-formylglutathione hydrolase	4293500	0	0	0	0	63231000	9796700	0	0	39676000	4571500	7505200	4020000	132272000	6296700	10771000	0	4971100	4126100	71306400	16362900	133899800	3962100	124760900	219929000	4668700	81441400	264864200	113590600	311987700	31372400	231499000	33580400	72180300	3840200	79403000	84096700	41967100	72213600	197775800	160232600	78151400	163872900	96633100	128264900	703932000	0
ESM1	Q9NQ30;Q9NQ30-2	Endothelial cell-specific molecule 1	0	0	0	0	0	0	0	0	0	0	0	0	0	0	0	0	0	0	0	0	0	0	0	0	0	0	0	0	0	0	0	0	0	0	0	0	41031000	12277900	0	146210000	0	146127000	71441000	5880700	0	0	0
ESYT1	Q9BSJ8;Q9BSJ8-2	Extended synaptotagmin-1	0	0	0	0	0	0	0	0	0	0	0	0	0	0	0	0	0	0	0	0	0	0	0	0	0	0	0	48344600	2570400	14138000	0	0	0	1016500	0	0	0	0	0	0	0	0	0	0	0	0	0
ETF1	P62495;P62495-2	Eukaryotic peptide chain release factor subunit 1	0	0	0	0	0	0	0	0	0	0	0	0	0	0	0	0	0	0	0	0	0	0	0	0	0	0	0	0	0	0	0	0	0	0	0	0	870860	0	2708900	11069370	13799350	40792300	9971500	1391980	18744670	73637200	0
ETFA	P13804;P13804-2	Electron transfer flavoprotein subunit alpha, mitochondrial	0	0	0	0	0	0	0	0	0	0	0	0	0	0	0	0	0	0	0	0	0	0	0	0	18244100	0	0	59751000	13362000	49786400	0	13848500	0	2964500	0	0	0	0	0	0	299570	320250	0	0	7116000	70887800	0
ETFB	P38117;P38117-2	Electron transfer flavoprotein subunit beta	0	0	0	0	0	0	0	0	0	0	0	0	0	0	0	0	0	0	0	0	0	0	0	0	8660500	0	0	84093100	63368100	80198700	0	38942000	6628200	13282000	0	0	0	0	0	0	1244060	1460700	0	0	2505000	53963300	0
EVL	Q9UI08;Q9UI08-2;Q9UI08-3;Q9UI08-4;Q9UI08-5	Ena/VASP-like protein	0	0	0	0	0	0	0	0	0	0	0	0	0	0	0	0	0	0	0	0	0	0	0	30004000	0	0	0	30019000	6675610	0	0	0	0	0	0	0	0	0	0	3222500	2797200	0	2684200	0	491370	109114700	0
EVPL	Q92817	Envoplakin	0	0	0	0	0	0	0	0	0	0	0	0	0	0	0	0	0	0	0	0	0	0	0	0	0	0	0	0	0	0	0	0	0	0	0	0	0	0	0	0	0	0	0	0	0	0	0
EWSR1	Q01844;Q01844-2;Q01844-3;Q01844-4;Q01844-5;Q01844-6	RNA-binding protein EWS	0	0	0	0	0	0	0	0	0	57358600	0	0	0	0	0	0	0	0	0	0	0	0	0	0	0	0	0	0	18788000	0	0	0	0	0	0	0	1196800	0	9020500	24979500	23911030	50832200	16096000	2494600	13699740	949920000	0
EXT1	Q16394	Exostosin-1	0	0	0	0	0	0	0	0	0	0	0	0	0	0	0	0	0	0	0	0	0	0	0	0	0	0	0	0	0	0	0	0	0	0	0	0	21011600	11308600	12958200	28360000	22165500	9755000	11411200	16916300	10500500	8320600	0
EXT2	Q93063;Q93063-2;Q93063-3	Exostosin-2	0	0	0	0	0	0	0	0	0	0	0	0	0	0	0	0	0	0	0	0	0	0	0	0	0	0	0	0	0	0	0	0	0	0	0	0	85365700	56457840	42086500	11524300	54169000	4614400	41923000	49466980	46378700	52809000	0
EXTL2	Q9UBQ6	Exostosin-like 2	93618400	5168000	15569000	232456000	31644600	64669000	185965000	35422000	13654000	5844000	0	43743500	0	0	63428700	62004900	132321500	46323400	49040500	130582000	64200700	7472700	148585000	46310200	52822000	142557000	37404400	5226100	3248150	0	19432100	101201300	28322000	12177000	72455300	61483200	235842600	132456200	93618700	193862000	208309000	66783800	291444000	103929800	116575800	202725700	0
EZR	P15311	Ezrin	1284296	3599667	5349131	0	3341660	8991411	6011185	0	2965067	217001935	6979433	0	5782352	14849242	5395432	12618386	2242233	7160986	0	162766719	1126894987	1743672369	349135925	1249924290	116012507	222825200	740027693	4116741943	518393777	997293928	580778103	1941338362	1936155271	902435434	86388055	352095931	264757199	393947805	769344571	535964164	624556209	789380260	357855267	430500760	873399756	4628613373	1830698
F10	P00742	Coagulation factor X	113325000	80145400	130750000	34696400	54602000	85533000	266183000	129637000	7446900	0	0	125726000	32364600	2660600	144154000	195264000	212716500	23140700	157584000	141063700	119796900	40938700	150325000	126183800	82506000	129826800	28726800	0	0	748140	53887400	80478600	78486000	52111700	120936400	149903100	3207728200	2309305500	2922662700	1670658200	1621658100	2059490900	4151626700	3505674500	1172307400	259723890	0
F11	P03951;P03951-2	Coagulation factor XI	26226624	0	13714550	1869093	0	0	16939815	2791300	0	0	3181254	11781792	96608682	0	2397850	42228377	3098436	0	21512774	0	0	0	0	0	0	0	0	0	0	0	0	0	0	0	0	0	267572910	528005435	743131420	1198169598	276519429	797144081	846845898	843885098	212044069	110528818	0
F11R	Q9Y624;Q9Y624-2	Junctional adhesion molecule A	0	0	0	0	0	0	0	0	0	0	0	0	0	0	0	0	0	0	0	0	0	0	0	0	28071900	0	0	23440600	3832500	39559500	0	0	0	0	0	0	0	0	0	0	0	0	0	0	0	0	0
F12	P00748	Coagulation factor XII	428684100	511267000	1222156500	345137900	672874300	83625000	268145000	278791800	221592200	23928900	63791500	559246000	412980000	244395900	703525400	499976000	909891600	199819100	852994000	627730000	1106596140	575929000	888454000	2143263000	1035494000	404685700	204890900	100994900	4083000	310128900	239821000	1015283880	524484000	309994000	720116000	1088066900	2055770900	4363588700	4893127200	2070361100	3934025100	2255784200	1462285450	2094729300	2483874200	500037100	54213600
F13A1	P00488	Coagulation factor XIII A chain	1506900	0	0	0	18272600	0	5144500	0	0	0	0	0	0	0	0	77404000	0	0	0	0	2285600	25770000	3900700	5821900	0	4823500	1644000	561299	4175000	2542463	842230	0	0	22923200	0	3091700	373220770	151946600	392557355	353382249	1881494138	438860353	723554386	292620200	119974900	452653605	0
F13B	P05160	Coagulation factor XIII B chain	0	9278400	25111000	16285300	7410700	0	34911000	0	0	2977300	0	0	21807000	0	7588200	26227200	0	25789200	74823900	2004400	9970400	0	15950500	50366000	8397500	17910800	0	0	0	12380000	0	8610000	0	6717300	1853700	26533000	18343900	171945900	497875300	56601880	283354800	36363100	155385900	114990190	308696100	116366700	0
F2	P00734	Prothrombin	2935003900	3664486000	5337014000	3448963000	3491233600	414576000	4413914200	6601688900	1711987100	994553500	1355747700	5717734800	2646235000	1760013400	4366755000	4535803000	4201992900	2325605000	6173696900	2457011800	4137442200	2406324500	4971212000	9034061000	5293776800	3300232800	2401809900	688907500	232030900	1760946300	1556428900	3266177500	1907005700	2400111800	2044631900	5286722000	15664998400	22934614400	39324410200	10959268100	16062970620	24935163600	18533425100	30120865900	18397787600	5251288300	375865800
F3	P13726;P13726-2	Tissue factor	0	0	0	0	0	0	0	0	0	0	0	0	0	0	0	0	0	0	0	0	0	0	0	0	0	0	0	0	0	0	0	0	0	0	0	0	18134000	19784200	5572400	26494800	11837100	16633900	22852500	19046700	9483100	508980	0
F5	P12259	Coagulation factor V	385155100	531781700	997166600	36356300	838834500	237047200	217363500	447389400	866321400	171648300	138421000	530332900	314060800	625184400	356834500	651798200	410492400	1181599200	773976200	802602200	1714422500	1049427100	261904300	1312223500	637228100	585705300	493022200	1384338300	364612760	707855700	523941000	835447000	869543000	724903800	476896700	1269468800	26308922000	24666332100	26884158350	12276380500	29981414000	9667576400	18474855820	25113778700	28667519730	6714349540	69200600
F7	P08709;P08709-2	Coagulation factor VII	0	0	0	0	0	0	0	0	0	0	0	0	0	0	0	0	0	0	0	0	0	0	0	0	0	0	0	0	0	0	0	0	0	0	0	0	35085200	65734900	48438700	6163100	100495000	1432900	99285400	18324300	3506400	0	0
F9	P00740;P00740-2	Coagulation factor IX	52536600	35666000	91560400	17537000	45398300	14002000	109269800	59241000	0	9158700	0	62666000	54287000	7315100	60546900	107540000	48488600	54416200	77118300	2218000	34746600	37933200	3547700	73951600	36461100	39739700	16311000	1308400	776020	8118200	7465700	8475100	6452500	24758600	3315300	43872300	1003113600	1148109000	3586119400	360537600	2304615900	746136430	2336316200	2223888200	1185854000	234344600	0
FABP3	P05413	Fatty acid-binding protein, heart	0	0	0	0	0	0	0	0	0	0	0	0	0	0	0	0	0	0	0	54523000	47054000	2281400	35112000	11766100	21761000	3400800	9961700	129466471	20950200	92306353	13820900	54887030	17982300	10973000	10885000	8004800	10559520	4827460	18349200	9406501	94737300	8189640	9000300	24098100	19699791	19069400	0
FABP5	Q01469	Fatty acid-binding protein 5	43106400	0	7709900	42328000	132721600	16766000	35379000	11380000	22778200	628063900	75963000	9251600	4841300	492680400	22872000	262455000	0	7153000	8648500	283251900	452206000	594132500	415330000	487809000	867905500	242676400	362680100	683234450	943656600	908190000	448684600	1432821000	980168200	1419076600	135680600	336936000	110576800	84308930	224365900	200279300	659053000	145787500	171510500	154533300	147326600	5078210000	60096530
FABP7	O15540;O15540-2	Fatty acid-binding protein, brain	0	0	0	0	0	0	0	0	0	0	0	0	0	73041000	0	0	0	0	0	0	2882600	0	0	0	24561000	0	0	94222800	0	8584900	12107400	68137900	44398200	24113000	0	7698100	0	0	0	0	1274300	1882100	0	0	6512500	13165200	0
FAH	P16930;P16930-2	Fumarylacetoacetase	0	0	0	0	0	0	0	0	0	19660500	0	0	0	0	0	0	0	0	0	0	0	0	0	0	0	0	0	0	0	0	0	0	0	0	0	0	0	0	0	0	0	0	0	0	0	0	0
FAHD2A;FAHD2B	Q96GK7;Q6P2I3	Fumarylacetoacetate hydrolase domain-containing protein 2A; Fumarylacetoacetate hydrolase domain-containing protein 2B	0	0	0	0	0	0	0	0	0	0	0	0	0	0	0	0	0	0	0	0	0	0	0	0	0	0	0	0	0	0	0	0	0	0	0	0	0	0	0	0	0	0	0	0	0	13380100	0
FAIM2	Q9BWQ8	Protein lifeguard 2	44950000	13028000	12953000	6186700	22621400	5403300	39739000	17744000	13118000	17507600	0	0	8401100	13789000	24680000	24259000	27350000	30239300	15432000	2129400	455870	0	37834600	9043100	28534500	20324700	370150	13575500	2458340	1043500	1270600	21563700	12088600	5015900	360350	1138400	0	0	0	0	0	0	0	0	0	0	0
FAM107B	Q9H098;Q9H098-2	Protein FAM107B	0	0	0	0	0	0	0	0	0	0	0	0	0	0	0	0	0	0	0	0	0	0	0	0	0	0	0	30491100	3457600	27127400	0	0	0	3655800	0	0	0	0	0	0	0	2233800	0	0	1440400	102117800	0
FAM114A2	Q9NRY5	Protein FAM114A2	0	0	0	0	0	0	0	0	0	0	0	0	0	0	0	0	0	0	0	0	0	0	0	0	0	0	0	0	0	0	0	0	0	0	0	0	0	0	0	592480	0	8260700	0	0	15848600	0	0
FAM120A	Q9NZB2;Q9NZB2-2;Q9NZB2-4;Q9NZB2-5;Q9NZB2-6	Constitutive coactivator of PPAR-gamma-like protein 1	0	0	0	0	0	0	0	0	0	0	0	0	0	0	0	0	0	0	0	0	0	0	0	0	0	0	0	36549600	816030	18796000	0	0	2137500	0	0	0	0	0	0	0	0	0	0	0	0	0	0
FAM177A1	Q8N128;Q8N128-2	Protein FAM177A1	0	0	0	0	0	0	0	0	0	0	0	0	0	0	0	0	0	0	0	0	0	0	0	0	0	0	0	0	0	0	0	0	0	0	0	0	8464900	0	0	15048100	5734200	7870500	14833800	6774070	5594700	605130	0
FAM20A	Q96MK3	Pseudokinase FAM20A	0	0	0	0	0	0	0	0	0	0	0	0	0	0	0	0	0	0	0	0	0	0	0	0	0	0	0	0	0	0	0	0	0	0	0	0	60828529	16091045	25558153	29163481	21037652	13485961	23585288	13253473	1943726	422377	0
FAM20B	O75063	Glycosaminoglycan xylosylkinase	0	0	0	0	0	0	0	0	0	0	0	0	0	0	0	0	0	0	0	0	0	0	0	0	0	0	0	0	0	0	0	0	0	0	0	0	118994600	65522400	23599500	25668600	193924600	14738820	119078700	147613700	59565100	2380900	0
FAM20C	Q8IXL6;Q8IXL6-2	Extracellular serine/threonine protein kinase FAM20C	0	0	0	0	0	20120000	8956700	0	0	0	0	3600500	0	0	0	0	5603300	9958600	0	0	0	0	0	0	0	0	0	0	0	0	0	0	0	0	0	0	309877571	219158555	143186347	220993129	215363768	200959739	305609312	337971827	163042874	26657913	0
FAM3C	Q92520	Protein FAM3C	4011035000	712338000	667293000	5168547000	2071341000	2329801000	3217375000	859654000	1414350900	912356600	97324800	1763508000	736801000	705190600	2514646000	1868539800	2596374000	2030377900	1299034000	4407705500	1595826600	586972200	6532700000	1860347000	2994060000	4454667000	1405418000	417141100	464533100	140359400	867634000	4813183170	1528430700	964154200	2711949000	2003963970	8132963000	3368335000	1883189000	9474420000	3504512000	2546550000	6321743000	2802089000	1960798000	1807989800	849312500
FARSB	Q9NSD9;Q9NSD9-2	Phenylalanine--tRNA ligase beta subunit	0	0	0	0	0	0	0	0	0	0	0	0	0	0	0	0	0	0	0	0	0	0	0	0	0	0	0	0	0	0	0	0	0	0	0	0	0	0	0	12084000	0	10585000	691020	0	3970620	53325700	0
FASN	P49327	Fatty acid synthase	0	0	0	0	0	0	0	0	0	0	0	0	0	0	0	0	0	0	0	0	10152600	0	13248000	0	9322100	0	0	823374400	109198100	1005847900	1958700	96131900	6802400	33365600	0	0	0	0	0	2395900	0	31387190	1499000	0	127513000	206478300	0
FAT1	Q14517	Protocadherin Fat 1	0	0	0	0	0	0	0	0	0	0	0	0	0	0	0	0	0	0	0	0	0	0	0	0	0	0	0	0	0	0	0	0	0	0	0	0	106865700	156525900	103995000	6729510	116918500	14079200	88026500	58540720	71629860	1269060	0
FAT2	Q9NYQ8	Protocadherin Fat 2	291570700	27161500	33324100	87008200	207384100	454117600	517583400	133486200	116194500	0	0	170174500	15129600	0	113179800	24987000	301413500	110061800	60210700	745570900	211203700	89693700	362700200	568304300	1049148900	919853400	327095500	32421400	0	0	323681400	258355200	202030600	84165740	403615180	334217800	3591533300	3055636600	1177003550	480962310	7020972800	1683666740	4393182800	3391768800	3269120100	189472400	19564700
FBL;FBLL1	P22087;A6NHQ2	rRNA 2`-O-methyltransferase fibrillarin; rRNA/tRNA 2`-O-methyltransferase fibrillarin-like protein 1	0	0	0	0	0	0	0	0	0	0	0	0	0	0	0	0	0	0	0	0	0	0	0	0	0	0	0	0	0	0	0	0	0	0	0	0	0	0	240080	0	0	0	0	0	1788360	23491800	0
FBLN1	P23142;P23142-2;P23142-3;P23142-4	Fibulin-1	14552589300	12447573700	14571669900	11649360200	14697455400	3262182400	13229326100	8714294900	8306314500	3865557000	1390311600	12134690400	5689372800	9232379100	15046730400	18604216500	16199439300	16550527400	11906104700	11556051300	12630375900	9809369100	19221163000	11501586200	18674295980	13643902700	7276273800	7926637000	1764741100	3023874100	5853691550	17948219000	10765525000	8897628400	9855426600	12273492700	79333072700	78341525000	100521347500	30541208500	90418775500	59229539500	99762572000	84283901900	106357364400	39720019500	3687688400
FBLN2	P98095;P98095-2	Fibulin-2	282471500	99836500	35289900	57502500	92321100	68658700	99566000	3223700	5673200	4182400	0	43616300	5418200	2074300	109149800	139598100	204826700	52757400	32746000	286266900	126374100	100750900	281750000	61099200	181551000	218613830	83118200	84806400	9673620	0	27098100	64412600	112163500	111038100	113524760	164291400	5245805000	3262745000	1727503850	4530618000	2036914800	2054256400	5345789500	2308848600	837844700	516508100	25337200
FBLN5	Q9UBX5	Fibulin-5	452992800	257568700	244703000	521402000	195653800	177162000	471767000	248120600	102921000	35807500	0	396046900	129275700	25987600	488470600	521310500	510992000	190065000	356697000	376458000	519141400	197431500	1127572600	277685000	394588100	501557800	336981900	99059200	32623500	18932000	192850200	597329900	358299500	198891430	316306100	553655300	2525636000	1390695000	1467552100	1962961200	1421556800	1264756000	2235984000	1739630300	1245869000	690202600	66754800
FBLN7	Q53RD9;Q53RD9-2;Q53RD9-3;Q53RD9-4	Fibulin-7	48109700	0	0	0	3354800	0	14076000	0	0	0	0	0	0	0	9583900	0	11780000	0	0	0	0	0	0	0	0	0	0	0	0	0	0	0	0	0	0	0	488598000	313863000	78425700	411334000	375677200	218158700	542894000	318456000	292002500	14212900	0
FBN1	P35555	Fibrillin-1	68346200	32346500	29739000	18716800	16707200	17353000	76440700	0	3911500	13771300	0	119462100	12008200	10705500	61866600	49665400	53405200	23811200	118481500	41646600	35732800	23776200	84594600	42476200	60772000	42870300	16860900	45383600	10407800	9584500	10947100	58693500	11515200	29867200	38256800	33739600	8455600524	6152905242	5323098396	11825366745	4598400034	11214875116	10578629090	5792725833	3795641541	1967722874	0
FBN2	P35556;P35556-2	Fibrillin-2	0	0	0	0	0	0	0	0	0	0	0	0	0	0	0	0	0	0	0	0	0	0	0	0	0	0	0	0	0	0	0	0	0	0	0	0	35896976	8757808	8071404	8642655	12721326	24319184	19152110	7813667	11985799	26387036	0
FBP2	O00757	Fructose-1,6-bisphosphatase isozyme 2	0	0	0	0	0	0	0	0	0	0	0	0	0	0	0	0	0	0	0	0	0	0	0	0	0	0	0	0	0	0	0	0	0	0	0	0	0	481640	21263600	0	611900	0	0	0	22877400	0	0
FBXO2	Q9UK22	F-box only protein 2	0	0	0	0	0	0	0	0	0	0	0	0	0	37612000	0	0	0	0	0	0	0	0	0	0	21207100	0	0	106109500	8076800	57492900	10845200	46115200	11443000	17354300	0	0	22846000	8957400	7684000	82540400	0	286897000	14962000	35810000	36261800	30287000	0
FBXO7	Q9Y3I1;Q9Y3I1-2;Q9Y3I1-3	F-box only protein 7	0	0	0	0	0	0	0	0	0	0	0	0	0	0	0	0	0	0	0	0	0	0	0	0	0	0	0	0	0	0	0	0	0	0	0	0	0	0	0	28971200	0	199810000	0	7988900	541627000	4804600	0
FCER1G	P30273	High affinity immunoglobulin epsilon receptor subunit gamma	0	0	0	0	0	0	0	0	0	0	0	0	0	0	0	0	0	0	0	0	19335000	4662800	0	0	0	0	0	27736000	0	0	545586100	15062000	14593000	0	0	0	0	0	0	0	0	0	0	0	0	0	0
FCER2	P06734	Low affinity immunoglobulin epsilon Fc receptor	0	0	0	0	0	0	0	0	0	0	0	0	0	0	0	0	0	0	0	0	0	0	0	0	0	0	0	0	0	0	0	0	0	0	0	0	0	0	0	2578400	0	36474000	0	0	0	30591800	0
FCGBP	Q9Y6R7	IgGFc-binding protein	6222702500	519973500	3634715400	5095986100	535201000	3204480100	4733313200	783896900	754583700	1032363000	889695900	16644093100	8324889600	2163152600	7917396200	5123794600	4025360400	3406376100	5380319600	4605186200	1266491900	1166899600	6142539900	2932002500	18429990400	3417219600	924299700	186591500	495529940	1166994500	4685062800	4782905600	4093311700	1421324800	936948480	3114860000	90011154100	15547686900	63400995930	5188854000	16996889000	100859247400	53393038700	27264286500	23676306400	22718437120	2073271100
FCGR2A	P12318;P12318-2	Low affinity immunoglobulin gamma Fc region receptor II-a	19459500	46531000	0	23736000	42912000	172678000	20055000	41831000	0	12470000	0	94660000	17305800	34480000	93460000	54339000	45732000	44007000	69495000	0	17416500	0	0	10563500	112072000	0	4745800	3243100	0	3381600	9742200	101843000	39279000	10175600	0	19793000	0	0	0	0	0	0	0	0	0	0	0
FCGR3A	P08637	Low affinity immunoglobulin gamma Fc region receptor III-A	110493000	35329000	34781400	94871000	133030000	156633400	26078900	109275000	22908000	29278900	0	125473000	135500000	85410800	221144000	37386000	34338500	58942000	66639300	75351000	156180000	35498300	202260000	41169000	529903000	86946500	42869000	30302600	12863500	23742400	12649600	122396400	152196000	13061000	22345200	35403700	0	0	0	0	0	0	0	0	0	0	1734300
FCGRT	P55899	IgG receptor FcRn large subunit p51	0	0	0	0	0	0	0	0	0	0	0	0	0	0	0	0	0	0	0	0	0	0	0	0	0	0	0	0	0	0	0	0	0	0	0	0	7939600	3040100	2314400	9980100	6383100	2937300	10818100	11680400	0	379430	0
FCN2	Q15485;Q15485-2	Ficolin-2	0	0	0	0	0	0	0	0	0	0	0	0	0	0	0	0	0	0	0	0	0	0	0	0	0	0	0	0	0	0	0	0	0	0	0	0	0	7305400	41090000	0	7172800	0	2339600	11988600	8713500	2527700	0
FCN3	O75636;O75636-2	Ficolin-3	0	0	0	0	0	0	14698000	73670000	0	0	0	0	48015000	0	0	0	0	0	0	0	0	0	0	0	0	0	0	0	0	0	0	0	0	0	0	0	1798200	10312760	31547200	0	17672300	8213800	13680000	36651800	12875900	38489300	0
FDPS	P14324;P14324-2	Farnesyl pyrophosphate synthase	0	0	0	0	0	0	0	0	0	0	0	0	0	0	0	0	0	0	0	1506600	9575300	19359000	0	2163200	0	1001800	1784000	37416000	24984000	37659000	7364300	0	11153000	21820000	0	0	30027500	22290000	46228400	7269700	73256700	34285700	31788900	29104600	133852200	514144500	0
FEN1	P39748;P39748-2	Flap endonuclease 1	0	0	0	0	0	0	0	0	0	0	0	0	0	0	0	0	0	0	0	0	0	0	0	0	0	0	0	0	0	0	0	0	0	0	0	0	0	0	0	0	0	0	0	0	1122910	21106900	0
FERMT2	Q96AC1;Q96AC1-2;Q96AC1-3	Fermitin family homolog 2	0	0	0	0	0	0	0	0	0	0	0	0	0	0	0	0	0	0	0	0	0	0	0	0	0	0	0	0	0	0	0	0	0	0	0	0	1687620	258200	1730850	41704100	700470	64096000	3904760	2021070	6073010	0	0
FERMT3	Q86UX7;Q86UX7-2	Fermitin family homolog 3	0	0	0	0	0	0	0	0	0	0	0	0	0	0	0	0	0	0	0	0	0	0	0	0	16554000	0	0	58553300	5413200	23053900	0	0	0	0	0	0	10477360	333400	50034650	129352000	262359700	243268900	108803700	938230	214955230	172207770	0
FETUB	Q9UGM5;Q9UGM5-2	Fetuin-B	37590800	32485000	24653000	46943000	17872000	12000000	71154000	63426000	0	0	2858500	0	13414000	32685000	68088000	0	66754000	27348600	158519000	40995000	36799000	0	37125000	60395000	44582000	26025600	24562000	3708300	0	7215200	4456900	25588000	6277500	0	11498000	118218300	94375500	199158000	128559300	47177200	72303500	79599200	136036000	165836000	144608400	5809700	0
FGA	P02671;P02671-2	Fibrinogen alpha chain	2655229100	1779611000	4370869000	3118925000	1061711300	6746254400	7944501000	7224098700	1349060300	987893200	8864431510	4429307000	1236368300	3943716900	2529461000	1887056000	5844048500	1657254600	6017747000	3598912600	12504465800	7118530400	9032497120	43876249900	26306977400	10324635299	8957277600	40514606700	1570788300	51099232700	3772890400	26378643140	3247816400	4607533210	3703052070	14127095300	55593030400	32500747400	51482468000	78485398000	23244719200	89796584500	149626777400	186805226830	17723422500	11922610200	535050700
FGB	P02675	Fibrinogen beta chain	3778742200	2023131000	5433432200	4152377000	1883863600	8386582300	9029652000	7445412200	1066572000	1229707400	6459890000	4064377000	1938851400	2799912500	2438385100	2203905000	6744639000	2521481700	6676813100	4490461700	11173515500	6183221700	6808540000	43082840000	21120390700	9138309100	8349945000	32152893000	898278900	51239076700	3796564700	17500058000	2370445300	4129013100	3987392400	14169915800	67927480400	48660822200	70373845500	109570332500	26296082260	187089677400	195214628300	212733988700	22546080300	16263201230	310944300
FGF1	P05230;P05230-2	Fibroblast growth factor 1	0	0	0	0	0	0	0	0	0	0	0	0	0	0	0	0	0	0	0	0	0	0	0	0	0	0	0	47746000	0	21643000	0	30281000	2534800	8153300	0	0	0	0	0	0	0	0	0	0	0	0	0
FGFBP2	Q9BYJ0	Fibroblast growth factor-binding protein 2	0	0	0	0	0	0	0	0	0	0	0	0	0	0	0	0	0	0	0	0	0	0	0	0	0	0	0	0	0	0	0	0	0	0	0	0	874360	6511200	14612600	10740900	28968000	23749100	20768300	53851500	6209600	1498000	0
FGFR1	P11362;P11362-10;P11362-11;P11362-12;P11362-13;P11362-14;P11362-15;P11362-16;P11362-18;P11362-19;P11362-2;P11362-20;P11362-21;P11362-3;P11362-4;P11362-5;P11362-6;P11362-7;P11362-8;P11362-9	Fibroblast growth factor receptor 1	127593000	32400000	56343000	118770000	65825000	86039000	203871000	71802000	73903000	6377000	0	125695000	22007100	22109300	165277000	62823000	292890000	82464200	63400000	222166900	88851400	36445700	304356000	108918600	135806800	219574000	68092100	24302100	16435100	0	56518400	150281000	93314300	48500400	182226200	126706400	1883190000	938623900	745656000	546500500	1792375000	1180382000	2394877000	1784220000	1123189600	376345300	32669400
FGFR2	P21802;P21802-14;P21802-15;P21802-16;P21802-17;P21802-18;P21802-19;P21802-2;P21802-20;P21802-21;P21802-22;P21802-23;P21802-3;P21802-4;P21802-5;P21802-6;P21802-8	Fibroblast growth factor receptor 2	84905000	56014000	8934700	104912000	60263000	0	132863000	48061000	0	39783500	0	79080000	6635900	43782100	124164000	0	125448300	77991000	70955000	42455300	42776000	5333800	180350000	18096000	49792000	120052700	19967100	0	11092200	0	10023000	88037000	43282600	9636800	65661600	43558000	844792800	853515100	413460800	806368000	651337200	527528400	1491565600	736381500	430248500	325355500	0
FGFR3	P22607;P22607-2;P22607-3;P22607-4	Fibroblast growth factor receptor 3	43033300	0	0	27387000	0	30207100	20373900	7098800	4679300	2931300	0	7664300	0	0	24983100	9375100	39945000	18534900	0	37207600	33306000	12160500	132356000	18203900	31319000	45716200	8563100	0	4851300	0	5351300	57054700	15066200	0	39176700	6014400	558305900	366889000	271681700	549161000	360656200	266081730	673673020	312685700	313918700	161214890	0
FGG	P02679;P02679-2	Fibrinogen gamma chain	3508195700	1638621500	5407450000	3873072000	1372043000	7636640000	9940401000	7825102000	1025501000	810425700	5833714000	4627232300	1857251200	1723510000	2711589000	2127111000	6419383000	1965007400	5624162200	3907296900	10636881000	5464698900	7095676000	34254378000	24266228500	8925591500	7742607400	34540440100	811911200	46650926500	3206824000	17109826000	2572530900	3717621900	4205997800	12004671000	71380933200	57544738000	82721115500	113372675000	31969852100	179878903200	217764042900	233854239800	25030704000	18680020000	332163600
FGL2	Q14314	Fibroleukin	0	0	0	0	0	0	0	0	0	0	0	0	0	0	0	0	0	0	0	0	0	0	0	0	0	0	0	0	0	0	0	0	0	0	0	0	18900400	35297200	28756900	41869400	10113630	62885300	45162800	19860800	27788300	28054200	0
FH	P07954;P07954-2	Fumarate hydratase, mitochondrial	0	0	0	0	0	0	0	0	0	0	0	0	0	0	0	0	0	0	0	0	0	0	0	0	18486600	0	8385200	238194000	20827500	262377200	0	26861800	0	0	0	0	8058700	9617800	11084000	13008000	6927500	13259000	13180000	12397000	10703600	94396200	0
FHAD1	B1AJZ9;B1AJZ9-3;B1AJZ9-4	Forkhead-associated domain-containing protein 1	0	48024000	0	106840000	15412000	0	55256000	0	0	0	27539000	56780000	0	23827000	58236300	0	73918000	35471000	20058000	0	0	0	0	0	0	0	0	0	0	0	0	0	0	0	0	0	0	0	0	0	0	0	0	0	0	0	0
FHL1	Q13642;Q13642-1;Q13642-3;Q13642-4;Q13642-5	Four and a half LIM domains protein 1	3712900	0	0	0	0	0	0	0	0	99791800	3144600	0	0	124272500	0	0	0	0	0	0	0	0	0	0	0	0	0	8103200	14294000	0	4438500	11100000	3212100	8539100	0	0	38656910	17457300	16111350	42534900	0	188068400	35629700	31078490	9608170	1590677000	0
FIS1	Q9Y3D6	Mitochondrial fission 1 protein	0	0	0	0	0	0	0	0	0	0	0	0	0	0	0	0	0	0	0	0	0	0	0	0	35723800	0	0	157628000	13323900	153801000	0	25327200	0	6985000	0	0	0	0	0	0	0	0	0	0	0	0	0
FKBP1A	P62942	Peptidyl-prolyl cis-trans isomerase FKBP1A	28272300	0	10560000	0	19353000	69433000	24738000	16257000	33026000	148453200	19023000	16171000	0	43534200	23187000	0	0	0	0	52375000	66159000	47808000	94642000	34527000	120980000	26167000	36840000	111610000	161995200	96129000	33449000	84638000	49937000	83138800	0	11395000	2935900	0	7034300	0	21196340	1636700	1693100	2448300	12604800	580371000	0
FKBP3	Q00688	Peptidyl-prolyl cis-trans isomerase FKBP3	0	0	0	0	0	0	0	0	0	0	0	0	0	0	0	0	0	0	0	0	0	0	0	0	0	0	0	14714100	16285700	19499100	0	2557500	0	0	0	0	0	0	2963760	48387700	22470070	64920000	5600400	0	50110700	374102000	0
FKBP4	Q02790	Peptidyl-prolyl cis-trans isomerase FKBP4	0	0	0	0	0	0	0	0	0	0	0	0	0	0	0	0	0	0	0	0	1461900	0	0	0	2136400	0	0	39141700	22003420	23113670	0	4477800	739610	0	0	0	0	0	0	2249150	13231200	14332070	341940	1672650	80912010	503364000	0
FKBP5	Q13451;Q13451-2	Peptidyl-prolyl cis-trans isomerase FKBP5	0	0	0	0	0	0	0	0	0	0	0	0	0	0	0	0	0	0	0	0	0	0	0	0	0	0	0	0	0	0	0	0	0	0	0	0	19028600	0	19322000	0	469720	0	10115000	0	22397700	72091700	0
FLG	P20930	Filaggrin	0	0	0	0	0	0	0	0	0	0	0	0	0	0	0	0	0	0	0	0	0	0	0	0	0	0	0	0	0	0	0	0	0	0	0	0	0	0	0	0	0	0	0	0	0	0	17466700
FLG2	Q5D862	Filaggrin-2	0	0	0	0	0	0	0	0	0	353053800	0	0	0	0	2676400	0	0	0	0	77359200	158034200	119619100	183587730	69906500	18611000	22780800	1460552800	202930930	62976600	77898300	122450650	368055200	204189580	175958200	33850220	45346900	0	0	0	0	0	0	0	0	0	0	219093840
FLNA	P21333;P21333-2	Filamin-A	19987500	0	0	0	0	15534300	3335800	0	0	0	0	0	5607900	12231200	7990700	20686100	0	0	0	95350000	366478745	145532000	57730000	51971800	410811400	68640800	117157771	344223360	18639084	310636108	27557400	216378900	207600640	184858653	9394300	12362400	5089952489	1438582123	2490825709	3386652211	1489086200	4457602410	4945012012	3818733969	1990326934	506796749	0
FLNB	O75369;O75369-2;O75369-3;O75369-4;O75369-5;O75369-6;O75369-7;O75369-8;O75369-9	Filamin-B	0	0	0	0	0	0	0	0	0	0	0	0	0	0	0	0	0	0	0	0	4234463	4518600	0	0	0	0	0	19304006	0	17739473	468730	2344100	1171100	1323884	0	0	2470743	78954175	81014201	2095551	1769417	29988829	78856123	61266649	3345841	21350825	0
FLNC	Q14315;Q14315-2	Filamin-C	0	0	0	0	0	0	0	0	0	0	0	0	0	0	0	0	0	0	0	6389300	8900892	0	0	0	32437000	0	13906429	5820734	50086	2124819	0	0	2819160	957303	0	0	13876068	4649313	23693990	4806369	11931142	58785661	34572167	28421283	19253804	1999317	0
FLOT1	O75955;O75955-2	Flotillin-1	0	0	0	0	0	0	0	0	0	0	0	0	0	0	0	0	0	0	0	2264900	37107600	76893000	321721900	5765800	1554760500	0	29948500	1867468200	35281500	3547422100	123209200	210634100	38948600	240261600	0	0	3428800	35600400	49979470	8728000	37799780	23498120	1908820	12118900	88144800	3248720	0
FLOT2	Q14254	Flotillin-2	0	0	0	0	0	0	0	0	0	0	0	0	0	0	0	0	0	0	0	0	53033500	52922200	230345000	10404500	1735879500	0	12452800	2148576200	56596300	3436504100	169434600	213250600	39081300	280801500	0	0	3000920	14783700	20868420	0	23704300	3165410	5089000	4982610	72110600	4263930	0
FMC1;LUC7L2	Q96HJ9-2;Q9Y383;Q9Y383-2;Q9Y383-3	Protein FMC1 homolog; Putative RNA-binding protein Luc7-like 2	0	0	0	0	0	0	0	0	0	0	0	0	0	0	0	0	0	0	0	0	0	0	0	0	0	0	0	0	0	0	0	0	0	0	0	0	0	0	0	0	20181000	0	14979820	0	0	48433000	0
FMNL2	Q96PY5;Q96PY5-3	Formin-like protein 2	0	0	0	0	0	0	0	0	0	0	0	0	0	0	0	0	0	0	0	0	0	0	0	0	0	0	0	152880600	0	170849500	0	14322600	0	0	0	0	0	0	0	0	0	0	0	0	0	0	0
FMOD	Q06828	Fibromodulin	57711300	20952900	98814200	0	44228000	40210500	162240000	24783000	11050000	2052700	0	38234000	0	15115000	55729600	83054300	106145000	0	36370200	69200000	59965700	54237000	11945800	46604000	50084000	63581000	46241000	1889600	6929300	0	31072600	26220700	14795900	5680900	67293000	103148000	1520801900	1349905000	1361239900	527776400	943966000	1230820600	2068534000	1801312000	631416000	205257500	20890300
FN1	P02751;P02751-1;P02751-10;P02751-11;P02751-12;P02751-13;P02751-14;P02751-16;P02751-17;P02751-2;P02751-3;P02751-4;P02751-5;P02751-6;P02751-7;P02751-8;P02751-9	Fibronectin	22007812000	10463804800	7430486400	23423067100	7837044800	14302593200	28036361000	8836142300	6066887500	4532699470	2784446100	10693387100	7339415900	4337244510	30079734900	13464356200	25355072800	11054588430	11481368000	52491834000	42447486370	7867624000	41294828160	21512694000	36260578170	35508543460	12423729600	59873362200	2930018700	19818116000	8124358600	36741825400	17886095930	10333310820	19384497000	21176575700	706802039770	412838222926	225307335040	816673899410	213356039770	592454127470	834347007990	420081747440	186898782970	112279456210	2684423680
FN3K	Q9H479	Fructosamine-3-kinase	0	0	0	0	0	0	0	0	0	0	0	0	0	0	0	0	0	0	0	0	0	0	0	0	0	0	0	0	0	0	0	0	0	0	0	0	0	1806600	0	12832100	0	202551500	6386400	1172200	325344200	2835520	0
FN3KRP	Q9HA64	Ketosamine-3-kinase	0	0	0	0	0	0	0	0	0	0	0	0	0	0	0	0	0	0	0	0	0	0	0	0	0	0	0	0	0	0	0	0	0	0	0	0	2057600	388900	0	11511000	1375000	27393500	4375200	0	25474000	0	0
FNBP1	Q96RU3;Q96RU3-2;Q96RU3-3;Q96RU3-4;Q96RU3-5	Formin-binding protein 1	0	0	0	0	0	0	0	0	0	0	0	0	0	0	0	0	0	0	0	0	0	0	0	0	0	0	0	0	0	0	0	0	0	0	0	0	0	0	0	0	0	0	0	0	515760	48436700	0
FNDC1	Q4ZHG4;Q4ZHG4-2	Fibronectin type III domain-containing protein 1	0	0	0	0	0	0	0	0	0	0	0	0	0	0	0	0	0	0	0	0	0	0	0	0	0	0	0	0	0	0	0	0	0	0	0	0	6306900	11751700	3053300	27456900	519770	6532600	8468100	1495200	437300	2037500	0
FNTA	P49354;P49354-2	Protein farnesyltransferase/geranylgeranyltransferase type-1 subunit alpha	0	0	0	0	0	0	0	0	0	0	0	0	0	0	0	0	0	0	0	0	0	0	0	0	0	0	0	0	0	0	0	0	0	0	0	0	0	0	0	2664800	3623100	4554900	1873500	0	0	74523900	0
FOLR1	P15328	Folate receptor alpha	7414700	0	36791000	0	11689000	0	0	6300900	5744300	28520800	0	28639600	5172200	18820700	6904000	9869000	0	27852800	47621400	61031800	578156000	670943000	39493500	294339100	34457000	45986000	172260200	348927700	7931300	102266100	57943500	245034600	157073900	132598400	17904000	137047970	134509000	564826000	1268430000	17031500	286976310	71335900	131592400	257556000	927693000	107012900	7049800
FOLR2	P14207	Folate receptor beta	24467000	0	0	16911000	0	0	3017200	0	0	1668400	0	5347100	25663000	0	15477000	8550600	0	13478000	0	19539200	11318300	15134100	29594000	3908500	71071000	19121000	4004100	1454400	2249400	605560	5011840	24890900	7242300	7004400	2712800	11050500	89070000	60041700	46010400	86266500	26488000	101843900	40946400	25170900	43347400	69189200	0
FREM2	Q5SZK8;Q5SZK8-2	FRAS1-related extracellular matrix protein 2	0	0	0	0	0	0	0	0	0	0	0	0	0	0	0	0	0	0	0	0	0	0	0	0	0	0	0	0	0	0	0	0	0	0	0	0	133876400	43272000	13515350	191163400	105534300	9358170	109828100	23590000	2522100	0	0
FRRS1L	Q9P0K9	DOMON domain-containing protein FRRS1L	26953000	0	6328000	4805800	5284500	0	42700000	0	0	0	0	12463700	2698800	0	0	0	22325100	0	0	13797140	5873300	2470500	23688000	3051900	17685000	13458000	3707080	5029200	0	1545300	1495000	15245000	1137400	1338900	3670050	3088800	516959100	156771900	144223200	741593000	250261700	249445100	548433600	203128900	96702000	33643190	11134300
FRZB	Q92765	Secreted frizzled-related protein 3	46706000	31345000	16688000	27503000	18829000	0	42235000	143163000	0	5302400	0	0	11942700	0	28465000	0	69868000	25886900	41647900	238093100	264712000	78957000	191248000	94549000	188229000	155350000	67505000	17834700	7343500	18423900	5448600	109201000	61797000	29523600	172242000	252965000	2876510000	3652950000	1475698000	3737140000	1486460000	2608895000	3591630000	2488440000	584513000	77773300	0
FSCN1	Q16658	Fascin	5732900	0	4833400	0	38691000	0	0	0	3750600	0	23642000	4385500	1756600	30940000	0	8477900	0	10372000	6513800	23212600	16153600	105260200	11368000	0	26682900	34989100	17362200	491871300	35439200	773432000	23656000	241434900	42917600	21925500	2479000	34120800	188219000	158406180	359997220	453219600	690972200	321689400	714261300	178080200	310653070	165076940	2279670
FST	P19883;P19883-2	Follistatin	0	0	0	0	0	0	0	0	0	0	0	0	0	0	0	0	0	0	0	0	0	0	0	0	0	0	0	0	0	0	0	0	0	0	0	0	10964530	5525420	600900	14798500	1154935	7135100	5117800	3557100	484670	0	0
FSTL1	Q12841;Q12841-2	Follistatin-related protein 1	252728100	182636000	250984000	184067200	197024900	89220000	294117000	104361300	142759800	214136500	12704500	298080000	101414300	138145200	265179000	282620100	258432000	252031700	258817800	178181600	225727600	151595210	314892000	233692500	407384000	247964700	96733800	58674600	110288600	27520100	69205100	280563000	122173700	103698000	102026740	221589200	2755144000	2242600000	2522797000	1739435000	2758173000	2097608000	3496385600	2341346000	1861002000	2514704000	38562400
FSTL3	O95633;O95633-2	Follistatin-related protein 3	11869000	0	20111000	0	20088400	0	0	8716600	14456000	0	0	0	13653000	10292000	8720900	71223000	0	0	0	0	0	10946000	0	13613000	44580000	9574500	17165000	0	8200200	0	10251100	32179000	11795000	40278000	15744000	6511000	157298200	101753900	366933500	103430900	400646300	78546600	189544100	451881000	289889600	296670100	0
FSTL4	Q6MZW2;Q6MZW2-2;Q6MZW2-3	Follistatin-related protein 4	208253580	16252200	0	40938498	18834300	72851600	277159466	3225900	14405977	0	0	5705700	7884929	0	109369300	4909100	407797794	23315200	25852200	232819928	101246700	6391500	29415900	46489100	128962300	313552322	21844437	3199400	0	0	6495800	106828400	56439800	0	186115200	54159000	6927470650	4297770346	1392667252	1615605449	5065188162	3074208078	8975478493	2638715376	1489891254	40101420	69214100
FSTL5	Q8N475;Q8N475-2;Q8N475-3	Follistatin-related protein 5	16604920	0	0	5596502	3755900	8531000	21346134	0	2449323	0	0	0	1387171	0	0	0	18139206	0	8013000	11599072	3682000	0	0	0	5962800	140378	142463	0	0	0	0	0	0	0	4940900	4876000	2496064750	1163130554	769254848	301589651	1671089638	759622812	2113840507	1066748424	486195646	7525510	0
FTH1	P02794	Ferritin heavy chain	0	0	0	0	0	0	0	0	0	0	0	0	0	0	0	0	0	0	0	71541700	267652510	373477200	94673200	215803300	354385980	29065400	124115600	3765903000	230390300	5405528200	95668800	2058115000	202363300	261775800	44647900	86306800	188204000	161165900	141209800	260395600	251997700	107651000	186174530	189507300	125051600	350525100	3195200
FTL	P02792	Ferritin light chain	0	0	0	0	0	0	0	0	0	0	0	0	0	0	0	0	0	0	0	207340000	576702500	572107160	481870000	503235600	1293947900	279320200	178472300	1186431400	164593200	1590731300	86257200	1188341200	264453220	267310460	186489540	107158600	78501300	69747000	177306200	120893000	506063000	126525200	114907200	193310000	68015500	283913000	14009000
FUBP1	Q96AE4;Q96AE4-2	Far upstream element-binding protein 1	230620000	0	0	0	0	0	0	0	0	25844600	0	0	0	0	26533000	0	0	0	0	0	0	0	0	0	0	0	0	0	21035000	0	0	0	0	20641400	0	0	3149400	10739300	10338343	365714	13169010	38103967	4547000	0	6121000	571424955	0
FUCA1	P04066	Tissue alpha-L-fucosidase	46198400	17251300	47023800	0	12515000	72165000	9495500	38708900	0	6137500	0	18659000	5200200	0	53780600	0	107192000	48685600	30881300	52602000	67219000	25726100	21141000	23887900	92266000	22399000	37636800	0	17451700	0	7052500	11920800	34589300	9497800	54911000	43434000	35191600	29558800	38713800	67973600	38266000	40009900	44985500	49120700	1709800	80458870	25305300
FUCA2	Q9BTY2;Q9BTY2-2	Plasma alpha-L-fucosidase	32391200	0	18930000	0	0	50581100	0	11816000	0	8244200	0	0	5488600	1615200	20534000	24090600	42067700	18005800	32411100	25831000	17916400	13511400	9993300	0	95523000	0	26224300	9420700	8515300	16694000	2300800	5374900	14914800	12691000	60001000	78845000	257299300	178316000	236781000	345109500	103248520	379414620	363822900	340364900	62149500	225184900	0
FUS	P35637;P35637-2	RNA-binding protein FUS	0	0	0	0	0	0	0	0	0	84063000	0	0	0	0	0	0	0	0	0	0	0	0	0	0	0	0	0	45117000	39983500	0	0	9838700	0	0	0	0	1829500	0	12111741	35317549	21227875	87005690	23948015	4254808	13772752	1099548257	0
FUT11	Q495W5;Q495W5-2	Alpha-(1,3)-fucosyltransferase 11	0	0	0	0	0	0	0	0	0	0	0	0	0	0	0	0	0	0	0	0	0	0	0	0	0	0	0	0	0	0	0	0	0	0	0	0	272523600	167740600	136188100	70898500	241225000	185901200	305298000	206264300	116839400	15465300	0
FUT8	Q9BYC5;Q9BYC5-2;Q9BYC5-3;Q9BYC5-4	Alpha-(1,6)-fucosyltransferase	0	0	0	0	0	0	0	0	0	0	0	0	0	0	0	0	0	0	0	0	0	0	0	0	0	0	0	0	0	0	0	0	0	0	0	0	103458000	43299820	6283200	165838300	34632450	5180380	109216600	30879630	1279830	831320	0
FXN	Q16595;Q16595-2;Q16595-3	Frataxin, mitochondrial	0	0	0	0	0	0	0	0	0	0	0	0	0	0	0	0	0	0	0	0	0	0	0	0	0	0	0	0	0	0	0	0	0	0	0	0	0	0	0	0	0	0	0	0	0	82075800	0
FXYD1	O00168	Phospholemman	0	0	0	0	0	0	0	0	0	0	0	0	0	0	0	0	0	0	0	47913000	207813800	407758000	61643000	193550000	56264000	46019000	94886000	280296000	22549000	138200000	63642000	189070000	164300000	129970000	6100000	64827000	0	0	0	0	0	0	0	0	0	0	0
FXYD6	Q9H0Q3	FXYD domain-containing ion transport regulator 6	0	0	0	0	0	0	0	0	0	0	0	0	0	0	0	0	0	0	0	0	0	0	0	0	49537000	0	0	228578000	32981900	226170000	12117000	28632000	0	4080300	0	0	0	0	0	0	0	0	0	0	0	0	0
FYN	P06241;P06241-2;P06241-3	Tyrosine-protein kinase Fyn	0	0	0	0	0	0	0	0	0	0	0	0	0	0	0	0	0	0	0	0	0	0	3031200	0	0	0	0	69819000	3277600	52446600	0	0	0	6074400	0	0	0	0	0	0	0	0	0	0	0	0	0
G3BP1	Q13283;Q13283-2	Ras GTPase-activating protein-binding protein 1	0	0	0	0	0	0	0	0	0	0	0	0	0	0	0	0	0	0	0	0	0	0	0	0	0	0	0	0	0	0	0	0	0	0	0	0	0	0	0	697070	0	5443870	1606500	0	2201180	110018000	0
G6PD	P11413;P11413-2;P11413-3	Glucose-6-phosphate 1-dehydrogenase	0	0	0	0	0	0	0	0	0	0	0	0	0	0	0	0	0	0	0	0	0	0	0	0	4431200	0	0	20933000	0	0	0	0	0	0	0	0	0	0	1282800	1278300	37844250	32878200	8899400	0	196603700	22974930	0
GAA	P10253	Lysosomal alpha-glucosidase	3627300	0	18474900	0	0	0	10584000	0	2554400	0	0	0	0	0	26556400	0	30744400	0	0	30835300	95276000	23924200	6125200	23627600	76692000	39406000	35411000	5182400	0	0	4862200	79630300	67819300	5405700	25878300	36390700	617498500	1070373000	708977640	822185600	1391813000	769070900	1257467000	811064600	435224800	111695700	8808900
GABARAPL2	P60520	Gamma-aminobutyric acid receptor-associated protein-like 2	0	0	0	0	0	0	0	0	0	0	0	0	0	0	0	0	0	0	0	0	0	0	0	0	0	0	0	0	0	0	0	0	0	0	0	0	5503800	3683300	2005500	11685200	3310300	3548100	15752800	2280800	4743000	72069000	0
GAL3ST4	Q96RP7;Q96RP7-2	Galactose-3-O-sulfotransferase 4	0	0	0	0	0	0	0	0	0	0	0	0	0	0	0	0	0	0	0	0	0	0	0	0	0	0	0	0	0	0	0	0	0	0	0	0	74181500	10682000	8629460	59933500	15065060	78615600	62495400	15410200	16688900	0	0
GALC	P54803;P54803-3;P54803-4;P54803-5	Galactocerebrosidase	0	0	0	0	0	0	0	0	0	0	0	0	0	0	0	0	0	0	0	0	0	0	0	0	0	0	0	0	0	0	0	0	0	0	0	0	199544200	144120200	80562300	184223400	146752000	78561600	421311100	242947100	94341800	19121500	0
GALK1	P51570	Galactokinase	0	0	0	0	0	0	0	0	0	0	0	0	0	0	0	0	0	0	0	0	0	0	0	0	0	0	0	18913200	0	9584400	0	3890900	0	0	0	0	0	0	0	0	0	0	0	0	0	0	0
GALNT1	Q10472	Polypeptide N-acetylgalactosaminyltransferase 1	0	0	0	0	0	0	19231990	0	0	0	0	0	0	0	0	0	12988077	0	0	0	0	0	0	0	0	0	0	0	0	0	0	0	0	0	0	0	103818248	77621723	16571692	6828245	72557671	14998676	53229499	23078700	22136722	19719217	0
GALNT10	Q86SR1;Q86SR1-2;Q86SR1-3;Q86SR1-4	Polypeptide N-acetylgalactosaminyltransferase 10	0	0	0	0	0	0	0	0	0	0	0	0	0	0	0	0	0	0	0	0	0	0	0	0	0	0	0	0	0	0	0	0	0	0	0	0	40219800	68122300	29315800	8673400	34491500	7593300	49313500	22128890	25882790	22251900	0
GALNT11	Q8NCW6;Q8NCW6-2	Polypeptide N-acetylgalactosaminyltransferase 11	0	0	0	0	0	0	0	0	0	0	0	0	0	0	0	0	0	0	0	0	0	0	0	0	0	0	0	0	0	0	0	0	0	0	0	0	24306400	68436200	60041500	0	56086400	1652700	28628300	39935600	60529100	254890	0
GALNT12	Q8IXK2;Q8IXK2-2	Polypeptide N-acetylgalactosaminyltransferase 12	0	0	0	0	0	0	0	0	0	0	0	0	0	0	0	0	0	0	0	0	0	0	0	0	0	0	0	0	0	0	0	0	0	0	0	0	14664000	717800	8509600	43454100	8420100	30647000	19379700	19249900	642310	453410	0
GALNT13	Q8IUC8;Q8IUC8-2;Q8IUC8-3	Polypeptide N-acetylgalactosaminyltransferase 13	12588300	0	0	0	0	0	7460510	0	0	0	0	2867700	0	0	6666200	0	31348823	0	0	0	0	0	0	0	0	0	0	0	0	0	0	0	0	0	0	0	177076052	97183677	27225398	17335355	150877049	7507124	109052121	69301800	76790578	8313	0
GALNT15	Q8N3T1	Polypeptide N-acetylgalactosaminyltransferase 15	0	0	0	0	0	0	0	0	0	0	0	0	0	0	0	0	0	0	0	0	0	0	0	0	0	0	0	0	0	0	0	0	0	0	0	0	247652800	200516820	247652300	556456900	455913400	269704000	369090420	588047900	210304700	2942480	0
GALNT16	Q8N428;Q8N428-2	Polypeptide N-acetylgalactosaminyltransferase 16	0	0	0	0	0	0	0	0	0	0	0	0	0	0	0	0	0	0	0	0	0	0	0	0	0	0	0	0	0	0	0	0	0	0	0	0	143794100	85482240	106827000	186952400	96999100	71161100	125761600	93211410	36280110	3847710	0
GALNT17	Q6IS24	Polypeptide N-acetylgalactosaminyltransferase 17	0	0	0	0	0	0	0	0	0	0	0	0	0	0	0	0	0	0	0	0	0	0	0	0	0	0	0	0	0	0	0	0	0	0	0	0	34109600	23476900	8560350	3341600	32059900	6010700	32974100	5821100	13553210	0	0
GALNT18	Q6P9A2	Polypeptide N-acetylgalactosaminyltransferase 18	0	0	0	0	4599500	2799500	4976300	0	0	0	0	0	0	0	0	0	14325700	0	0	0	0	0	0	0	0	0	0	0	0	0	0	0	0	0	0	0	322978500	318142000	186242000	136554370	339615000	90348100	286471000	151145000	183442300	5923150	0
GALNT2	Q10471;Q10471-2	Polypeptide N-acetylgalactosaminyltransferase 2	97176800	43407100	11086200	40244000	78495200	0	54315000	28305100	6292800	0	0	39290200	0	0	25965700	45116800	119394300	68758100	64584800	99798000	65650900	3135200	51195400	0	17682100	75466400	21236600	0	0	0	12805300	9511800	4307000	0	62431300	26224000	215978300	195710100	138434100	64311700	189206340	53848800	193328600	143793500	122174700	125206900	0
GALNT5	Q7Z7M9	Polypeptide N-acetylgalactosaminyltransferase 5	0	0	0	0	0	0	0	0	0	0	0	0	0	0	0	0	0	0	0	0	0	0	0	0	0	0	0	0	0	0	0	0	0	0	0	0	49549000	95888200	87604700	21148100	68832000	16604510	111433100	54851900	81956800	0	0
GALNT6	Q8NCL4	Polypeptide N-acetylgalactosaminyltransferase 6	8679300	7742800	5696800	60348000	0	9546400	104749000	0	7859800	0	0	0	3618600	0	71314100	16455400	83759300	6255900	17846100	36466700	9590500	3563100	99599000	2973300	0	84692700	4998800	2428300	0	0	7660100	64278000	14567000	3803900	25325200	18842700	335867900	325013700	175745250	169886500	188854820	98206500	309318800	101217100	194881600	7337000	0
GALNT7	Q86SF2	N-acetylgalactosaminyltransferase 7	10250000	11028000	0	29312700	0	0	47710100	0	0	0	0	0	0	0	0	0	7268300	16531900	7351300	0	0	0	0	0	0	0	0	0	0	0	0	0	0	0	0	0	70974300	87729370	11801800	7963100	119938280	0	53719800	25498500	47983390	240235300	0
GANAB	Q14697;Q14697-2;Q14697-3	Neutral alpha-glucosidase AB	46877400	11857000	0	11106000	8408000	3741600	44777300	0	6116500	5618600	1907000	0	2164500	0	0	0	12851000	0	0	79016800	32268100	7140500	74435100	20282800	133102000	54304300	12114900	303253900	72393000	219071800	14316700	119167400	36715200	40053400	11321000	6381400	2688109900	1203527200	796364600	4234863800	1501494200	1075696700	2945673000	1768625200	796319200	1237115960	13671300
GAP43	P17677;P17677-2	Neuromodulin	89913800	35082600	13021900	0	3836100	46029600	116201400	75359000	26555000	143283200	53335500	145510000	7316400	113953900	227888300	59295500	91432000	13639000	13664000	162397420	226954900	17135370	390046000	77409900	911879000	190277100	45979600	2303001200	816209100	1745080500	106534920	862751000	164391200	153564700	30780060	26301510	366235500	121930900	83437300	177422400	102077400	319136900	319169900	200853120	122489700	640119100	34372170
GAPDH	P04406;P04406-2	Glyceraldehyde-3-phosphate dehydrogenase	632415300	272757500	665185000	723231000	364262000	2015824800	1188453700	845971000	2579137000	3097227600	3787128000	848813000	1318069000	947546100	1671358000	2541928000	1697849000	137063200	223478000	3114433500	9124459000	2463429000	3665887000	2968840000	11818482000	4962079000	4263105000	17334951000	5083570300	21206691000	2491080000	13271740000	7355224900	6622446700	2691693500	1975553100	22528309860	18768818400	13121762110	47417415400	26507732700	62806111100	42094806500	52308955500	37089244800	49699030400	443132800
GAPVD1	Q14C86;Q14C86-2;Q14C86-3;Q14C86-4;Q14C86-5;Q14C86-6	GTPase-activating protein and VPS9 domain-containing protein 1	0	0	0	0	0	0	0	0	0	0	0	0	0	0	0	0	0	0	0	0	0	0	0	0	0	0	0	0	0	0	0	0	0	0	0	0	0	0	0	5116400	0	38798500	0	0	59260200	213650	0
GARS1	P41250;P41250-2	Glycine--tRNA ligase	0	0	0	0	0	0	0	0	0	0	0	0	0	0	0	0	0	0	0	0	0	0	0	0	0	0	0	0	0	0	0	0	0	0	0	0	422230	0	10382580	2311360	41841440	86925300	18538240	532330	37727220	978735600	0
GART	P22102;P22102-2	Trifunctional purine biosynthetic protein adenosine-3	0	0	0	0	0	0	0	0	0	0	0	0	0	0	0	0	0	0	0	0	0	0	0	0	0	0	0	0	0	0	0	0	0	0	0	0	0	0	830960	0	0	0	0	0	0	53062300	0
GAS1	P54826	Growth arrest-specific protein 1	0	0	0	0	0	0	0	0	0	0	0	0	0	0	0	0	0	0	0	0	0	0	0	0	0	0	0	0	0	0	0	0	0	0	0	0	25979100	19566300	16490500	33163300	25715300	22337300	39207600	20743700	0	0	0
GAS6	Q14393;Q14393-1;Q14393-3;Q14393-4;Q14393-5	Growth arrest-specific protein 6	38691400	5005900	0	46117400	24157500	0	29190200	0	9576500	0	0	7176600	12244700	0	43067700	12780800	66286700	0	5857400	42163000	28834300	0	40492000	0	63851400	31386000	2217000	0	0	0	6422200	14254200	13926600	0	37566700	24498900	3764671000	2021150800	1503454400	1385446700	3266400200	2164005000	3699340000	2188428800	1949472200	370685370	2597800
GASK1A	Q9UFP1	Golgi-associated kinase 1A	0	0	0	0	0	0	0	0	0	0	0	0	0	0	0	0	0	0	0	0	0	0	0	0	0	0	0	0	0	0	0	0	0	0	0	0	266749900	220265400	147258200	564029000	238758900	105865900	194001500	385867900	108109100	6088400	0
GASK1B	Q6UWH4;Q6UWH4-2;Q6UWH4-3	Golgi-associated kinase 1B	0	0	0	0	0	0	0	0	0	0	0	0	0	0	0	0	0	0	0	0	0	0	0	0	0	0	0	0	0	0	0	0	0	0	0	0	588135600	766130500	399051300	540876400	335539500	519542100	849407000	350338400	248216500	798180	0
GATD3;GATD3B	P0DPI2;P0DPI2-2;A0A0B4J2D5;A0A0B4J2D5-2	Glutamine amidotransferase-like class 1 domain-containing protein 3, mitochondrial; Putative glutamine amidotransferase-like class 1 domain-containing protein 3B, mitochondrial	0	0	0	0	0	0	0	0	0	0	0	0	0	0	0	0	0	0	0	0	0	4845900	0	0	53786000	0	0	94523000	68753400	90898000	4145400	44306000	15717000	18335700	0	0	0	0	2529000	0	5049500	8194600	0	0	1115700	287282200	0
GBA	P04062;P04062-2;P04062-3;P04062-4;P04062-5	Lysosomal acid glucosylceramidase	0	0	0	0	0	0	0	0	0	0	0	0	0	0	0	0	0	0	0	0	0	0	0	0	0	0	0	0	0	0	0	0	0	0	0	0	236012600	268838800	191572300	118703000	258328900	117123800	260166000	215548900	94403520	8748380	0
GBE1	Q04446	1,4-alpha-glucan-branching enzyme	0	0	0	0	0	0	0	0	0	0	0	0	0	0	0	0	0	0	0	0	0	0	0	0	0	0	0	0	0	0	0	0	0	0	0	0	1588000	0	20604000	0	58427400	8954700	4535400	4448800	68188600	108795500	0
GC	P02774;P02774-2;P02774-3	Vitamin D-binding protein	11380499200	24177780000	25485597700	20029715100	16323894000	4283253700	26427143000	17667233000	6194452600	5781387600	3110614200	18224413000	13047054000	13193609600	20336193400	18060956000	24014564000	13650889300	27803429900	16704588400	34587960000	18289274700	59955594450	80919295300	48487495300	40840081090	21152880500	6833748100	5176045000	13424680500	15887879700	42246644310	23748067540	14421697680	26169661820	56471546150	6506395300	7776938000	14201531800	10039274000	14078624500	20657205000	17112631000	8347833100	13911642000	23173211000	4099957500
GCHFR	P30047;P30047-2	GTP cyclohydrolase 1 feedback regulatory protein	0	0	0	0	17500000	0	0	0	0	31699800	0	0	0	0	0	0	0	0	0	0	0	0	0	0	0	0	0	0	0	0	0	0	0	0	0	0	0	0	0	0	0	0	0	0	0	0	0
GCLC	P48506	Glutamate--cysteine ligase catalytic subunit	0	0	0	0	0	0	0	0	15005200	0	9875300	0	8114200	5751100	0	0	0	0	0	0	0	0	0	0	0	0	0	17916000	0	55068000	0	2248600	0	0	0	0	0	0	0	0	0	7066400	0	0	103716200	20209100	0
GCLM	P48507;P48507-2	Glutamate--cysteine ligase regulatory subunit	0	0	0	0	0	0	0	0	4320900	0	11433100	0	5884900	0	0	0	0	0	0	0	0	0	0	0	0	0	0	12383200	0	34416000	0	0	0	0	0	0	0	0	280670	18692500	0	95776500	0	0	468053000	0	0
GCN1	Q92616	eIF-2-alpha kinase activator GCN1	0	0	0	0	0	0	0	0	0	0	0	0	0	0	0	0	0	0	0	0	0	0	0	0	0	0	0	0	0	0	0	0	0	0	0	0	0	0	0	0	0	0	0	0	0	9748250	0
GDA	Q9Y2T3;Q9Y2T3-2;Q9Y2T3-3	Guanine deaminase	122124800	0	14064600	151765000	0	58146900	138710000	1236200	4784200	49699000	0	10482300	0	64047100	128829100	27947700	102813200	6813200	0	157934500	205507500	47381000	367704000	34680000	201636600	310923000	68194600	178611800	192808000	111696400	58189100	174673000	116769800	84191000	126660230	42122000	549465900	713727700	402889400	34572600	663897800	86390900	564920500	222571900	342690900	1427305000	109539300
GDF11	O95390	Growth/differentiation factor 11	33537000	0	0	41402000	4444900	4069400	0	0	0	0	0	0	0	0	0	0	0	0	0	17359100	0	2916800	39714800	19988200	8630200	22325700	14556000	0	0	0	7123400	17722000	8102500	4885700	7888400	11354000	172196600	149047900	68975800	181263300	149044800	113182100	182002300	107170700	62997700	15379000	0
GDF15	Q99988	Growth/differentiation factor 15	0	0	0	0	0	0	0	0	0	0	0	0	0	0	0	0	0	0	0	0	0	0	0	0	0	0	0	0	0	0	0	0	0	0	0	0	3470400	24889600	7550800	60762400	131493000	31839900	25476900	38877300	31545400	0	0
GDI1	P31150	Rab GDP dissociation inhibitor alpha	70017405	0	13471085	74111046	4258700	124118438	62919000	13889000	41087971	50951883	32985000	100058200	30319581	261269317	74325400	49075648	34907400	0	26684648	79551916	242710216	47181978	56023652	26696536	145234490	50301312	47058817	2544870524	828435464	2033457312	220186995	1019357044	203990471	107658901	47551609	1855953	136490076	183415515	204896160	363469471	378603545	305701155	252880774	252844195	425549171	1374909334	3237900
GDI2	P50395;P50395-2	Rab GDP dissociation inhibitor beta	1655495	0	1551515	3697554	4258700	60087162	0	0	31616229	99830417	30063300	0	34631619	17284083	0	38810852	0	0	1396752	29814984	102485584	67771422	33143348	14822264	43784310	50709188	25679083	1026453976	644779536	1176070188	79619905	467355156	134672129	81350399	22203991	15186647	74479424	134879205	198015540	121595829	356406855	144200345	143745926	115277445	968190389	5444664066	0
GET3	O43681	ATPase GET3	0	0	0	0	0	0	0	0	0	0	0	0	0	0	0	0	0	0	0	0	2554400	0	0	0	6451400	0	0	43151000	2581900	39917000	0	4240700	0	0	0	0	0	0	639110	19978860	0	109356200	2118300	0	228762500	40383400	0
GFAP	P14136;P14136-2;P14136-3	Glial fibrillary acidic protein	10639000	0	0	340155400	0	5101715001	1711900	0	242248600	638	400394200	447530300	16720100	189105800	11248000	4771100	0	0	0	53520800	192100100	8551100	883872800	123087100	12564319274	10215160	39743600	12314911333	406160590	2747634342	337215100	2466644298	769589060	458488460	17567100	10190700	41843600	79023900	206127160	10787022275	127584600	61024987821	83006900	536550900	4890048400	112127320	25354900
GFRA1	P56159;P56159-2	GDNF family receptor alpha-1	0	0	0	0	0	0	0	0	0	0	0	0	0	0	0	0	0	0	0	0	0	0	0	0	0	0	0	0	0	0	0	0	0	0	0	0	9177700	8353000	4188700	8674700	2435300	4355600	6552200	0	0	552420	0
GFRA2	O00451;O00451-2;O00451-3	GDNF family receptor alpha-2	310641000	60209800	28871600	400913000	82065900	22335000	283942000	27687000	23828400	20571000	0	73075000	0	34212700	96041000	66315000	104301800	44108200	42554900	353289000	64241300	7599200	419906000	62787000	139364000	265013800	28074700	4840400	16751200	2281600	16821300	253533100	84731000	22148000	61046100	28266000	4202028000	1531107800	738931300	5313423000	1151625900	1477287400	3209581580	1180971900	608584300	364044000	16999800
GFRA3	O60609;O60609-2	GDNF family receptor alpha-3	0	0	0	0	0	0	0	0	0	0	0	0	0	0	0	0	0	0	0	0	0	0	0	0	0	0	0	0	0	0	0	0	0	0	0	0	21189700	26150400	12475740	5597300	15859100	26291590	4145200	26495500	1526140	0	0
GFUS	Q13630	GDP-L-fucose synthase	0	0	0	0	0	0	0	0	0	0	16704500	0	0	0	0	11758000	0	0	0	0	0	0	0	0	0	0	0	0	0	0	0	0	0	0	0	0	0	0	0	3838200	0	4418600	0	0	18945700	957020	0
GGCT	O75223;O75223-2;O75223-3;O75223-4	Gamma-glutamylcyclotransferase	0	0	0	0	0	0	0	0	0	0	0	0	0	0	0	0	0	0	0	30909500	41317700	11945700	60866000	9000800	11079000	11970200	523379000	53804000	23656600	19984800	18180700	78172700	58895500	28000500	0	4380700	0	0	1937200	0	4821600	0	2713900	0	0	54816800	25919700
GGH	Q92820	Gamma-glutamyl hydrolase	5415400	4630900	0	0	2229300	28105000	111951600	0	3464900	2015300	0	0	0	0	14917000	9419700	93726900	13235200	28885400	12476200	6855900	1707400	9267900	0	0	8744200	45414800	4885900	2887700	0	0	14091900	4144200	0	11239500	4993200	69404600	94611700	54429610	126304400	62322900	90946900	209485300	64865200	22460450	44750600	0
GGT5	P36269;P36269-2;P36269-3	Glutathione hydrolase 5 proenzyme	0	0	0	0	0	0	0	0	0	0	0	0	0	0	0	0	0	0	0	0	0	0	0	0	0	0	0	0	0	0	0	0	0	0	0	0	0	0	0	0	0	0	0	0	0	0	0
GIMAP4	Q9NUV9	GTPase IMAP family member 4	0	0	0	0	0	0	0	0	0	0	0	0	0	0	0	0	0	0	0	0	0	0	0	0	0	0	0	0	0	0	0	0	0	0	0	0	638470	1742800	6830400	12581600	9366700	4462000	7283500	4160300	5499400	310660	0
GINM1	Q9NU53	Glycoprotein integral membrane protein 1	0	0	0	0	0	0	0	0	0	0	0	0	0	0	0	0	0	0	0	0	0	0	0	0	0	0	0	0	0	0	0	0	0	0	0	0	95875000	54318000	32960400	55326900	75303000	53841000	123970000	61040000	25647900	3443320	0
GJA1	P17302	Gap junction alpha-1 protein	0	0	0	0	0	0	0	0	0	0	0	0	0	0	0	0	0	0	0	0	3070500	10743000	0	0	4128500	0	3568400	327510000	3778200	170332000	3851800	58918800	0	43176300	0	0	0	0	0	0	0	0	0	0	0	0	0
GLA	P06280	Alpha-galactosidase A	0	0	0	0	0	0	0	0	0	0	0	0	0	0	0	0	0	0	0	0	0	0	0	0	0	0	0	0	0	0	0	0	0	0	0	0	133395600	73729900	44834440	95268100	49432310	104157600	124581300	35865100	48830000	6142100	0
GLB1	P16278;P16278-2;P16278-3	Beta-galactosidase	0	0	0	0	0	0	0	0	0	0	0	0	0	0	0	0	0	0	0	0	0	0	0	0	0	0	0	0	0	0	0	0	0	0	0	0	135455400	149767300	133412200	128802700	127867400	103896700	261435500	121348400	70999800	37645800	0
GLCE	O94923	D-glucuronyl C5-epimerase	0	0	0	0	0	0	0	0	0	0	0	0	0	0	0	0	0	0	0	0	0	0	0	0	0	0	0	0	0	0	0	0	0	0	0	0	27069700	23065000	12117000	8145900	2725000	8142900	21574300	14569400	7281400	0	0
GLDN	Q6ZMI3;Q6ZMI3-2	Gliomedin	0	0	0	0	13136000	0	17851000	0	0	1990300	0	22117000	0	0	25154100	0	6783700	0	0	0	0	0	0	0	0	0	0	0	0	0	0	0	0	0	0	0	0	3444400	0	0	5341800	0	0	0	0	46511800	0
GLG1	Q92896;Q92896-2;Q92896-3	Golgi apparatus protein 1	10356000	0	0	9225900	11097000	0	0	0	3892200	8711700	0	0	0	7985700	8485500	0	11310500	7723100	0	47222700	15431700	12704400	31548000	13594000	26656800	34390500	14493500	46686500	6821000	20870000	5877640	45208800	21472100	23302400	1321360	19343400	212413700	263021400	382122700	137511100	226663700	70097100	226622600	250832500	380001500	110624330	7585400
GLIPR2	Q9H4G4	Golgi-associated plant pathogenesis-related protein 1	0	0	0	0	0	0	0	0	0	0	0	0	0	0	0	0	0	0	0	0	22291400	0	0	5617800	12835000	0	0	360656000	0	382953000	19812600	155353000	0	8459700	0	0	1926200	5443300	6424900	8028800	5875410	60761600	19253000	9694530	49443700	2697910	0
GLO1	Q04760;Q04760-2	Lactoylglutathione lyase	6102200	0	0	0	0	0	0	0	0	73145600	50662500	0	0	20432900	0	0	0	0	0	0	36853500	15902000	0	3824700	19361000	0	0	243287500	266038000	366192000	2310200	106954100	14177100	23992100	0	0	7978000	6893410	1931680	15405500	3673800	14975920	13710000	3356700	13991300	422531200	0
GLOD4	Q9HC38;Q9HC38-2;Q9HC38-3	Glyoxalase domain-containing protein 4	8142600	0	0	0	8083200	14232000	0	0	19732000	43351000	8868100	0	7966800	16729000	18707200	17016000	5850000	10970900	6437500	21913200	27085100	23262700	58605000	21156500	58556000	6820800	14097800	46469900	50716700	73053000	9240390	33302000	19287000	21996800	7703900	11006000	0	0	0	0	536710	0	0	0	512380	60611800	0
GLRX	P35754	Glutaredoxin-1	0	0	0	12714000	14033000	9322900	0	0	22441000	10466500	0	0	0	0	0	22815000	4570600	0	0	20290000	7867600	0	32101000	5414800	10626000	0	13394000	7255600	7296100	11831000	2313200	33799300	7373600	4936300	3303800	0	7410600	3535000	11646000	12646000	36669600	9749300	17278000	0	19074000	33079900	0
GLRX3	O76003	Glutaredoxin-3	0	0	0	0	0	0	0	0	0	0	0	0	0	0	0	0	0	0	0	0	0	0	0	0	0	0	0	0	0	0	0	0	0	0	0	0	0	0	1585200	8408200	9738600	85935500	8507900	0	110081000	92121100	0
GLRX5	Q86SX6	Glutaredoxin-related protein 5, mitochondrial	0	0	0	0	0	0	0	0	0	0	0	0	0	0	0	0	0	0	0	0	0	0	0	0	0	0	0	0	0	0	0	0	0	0	0	0	0	0	0	0	0	0	0	0	0	28462300	0
GLS	O94925;O94925-2;O94925-3	Glutaminase kidney isoform, mitochondrial	0	0	0	0	0	0	0	0	0	0	0	0	0	0	0	0	0	0	0	190430000	330170000	0	0	0	325651400	455360000	0	539682000	30201000	720657300	0	19206200	0	0	0	242320000	0	0	0	0	0	0	0	0	0	0	0
GLTP	Q9NZD2	Glycolipid transfer protein	0	0	0	0	0	0	0	0	0	0	0	0	0	0	0	0	0	0	0	0	3145100	0	0	0	0	0	0	247508000	3922800	213453700	0	66055600	0	0	0	0	0	0	0	0	0	0	0	0	0	0	0
GLUD1	P00367;P00367-2;P00367-3	Glutamate dehydrogenase 1, mitochondrial	0	0	0	0	0	0	0	0	0	27399200	6433400	0	0	0	0	0	0	0	0	0	0	0	0	0	156609800	0	0	983174900	85411500	1295993000	25400600	318209700	51403300	47993000	0	0	6586500	6201000	4093620	8478900	2948100	345964400	5963200	9111900	26749010	725484000	0
GLUL	P15104	Glutamine synthetase	0	0	0	0	0	0	0	0	0	0	0	0	0	0	0	0	0	0	0	0	3365000	10708000	0	0	65344900	0	0	353082600	79246800	522828000	34948000	161722100	3132400	67636300	0	0	0	0	0	0	0	0	0	0	0	0	0
GM2A	P17900	Ganglioside GM2 activator	2183935000	1094615600	1307149000	4034085000	963055800	1473251000	3394363000	1168605000	679301000	156439300	247994000	2106009000	900903400	276903800	3089205000	3061700000	3100249000	1848233000	1532823000	5841243000	3058914800	1073325430	10703660000	3284840000	4985346600	9144266000	2648038000	738878800	279541500	591516800	1737036000	6400797000	2725854000	1773730000	4737997500	4637881500	6995464800	7355533100	6870325000	5839337200	8347270600	5443341900	15427732200	7458479400	5404506900	2547864200	287146900
GMFB	P60983	Glia maturation factor beta	0	0	0	21520000	25063000	34829000	38194000	0	0	41827000	0	0	0	0	17640000	0	37185000	0	18148000	82225512	38347018	30535157	64440471	54132400	117263120	119529340	15347369	117147214	129612202	65533860	23270700	88738012	23811804	69590153	42307400	24239937	23731200	23118600	51301569	30812300	60145196	17549900	22851049	29217541	45279315	333886125	26080900
GMFG	O60234	Glia maturation factor gamma	0	0	0	0	0	0	0	0	0	0	0	0	0	0	0	0	0	0	0	7665488	2178082	13388243	13343529	0	33768480	5791660	2570031	9198886	17661298	22003840	0	22953088	5601196	53102847	0	6435063	0	0	1118031	0	40415004	5770100	445351	65359	5317885	69593975	0
GMPR	P36959	GMP reductase 1	0	0	0	0	0	0	0	0	0	0	0	0	0	0	0	0	0	0	0	0	0	0	0	0	0	0	0	0	0	0	0	0	0	0	0	0	0	0	2653800	22189800	35415000	167006000	0	0	353293700	0	0
GMPS	P49915;P49915-2	GMP synthase [glutamine-hydrolyzing]	0	0	0	0	0	0	0	0	0	0	0	0	0	0	0	0	0	0	0	0	0	0	0	0	0	0	0	0	0	0	0	0	0	0	0	0	0	0	0	1984000	1113700	14700180	0	0	17144100	53502300	0
GNA11	P29992	Guanine nucleotide-binding protein subunit alpha-11	0	0	0	0	0	0	0	0	0	0	0	0	0	0	0	0	0	0	0	2580700	29489600	20209411	7901200	9540500	0	0	16997100	284636307	55236715	210687622	8153642	51990590	10196100	11901800	0	4818600	0	0	0	0	0	0	0	0	0	0	0
GNA13	Q14344;Q14344-2	Guanine nucleotide-binding protein subunit alpha-13	0	0	0	0	0	0	0	0	0	0	0	0	0	0	0	0	0	0	0	16457000	88309300	126287200	4793700	53315500	0	2800500	39264200	305821000	4850200	266341300	27144100	137899300	68421700	96137700	0	16576400	0	0	0	0	0	0	0	0	0	0	0
GNAI1	P63096;P63096-2	Guanine nucleotide-binding protein G(i) subunit alpha-1	0	0	0	0	0	0	0	0	0	0	0	0	0	0	0	0	0	0	0	131376657	144069366	152354014	310399302	380247106	101909557	49438529	12187478	1240198223	86895699	1205171470	44119617	307945448	73739472	8062297	49298082	62407806	1579909	16453851	28354622	4921231	7802355	13263633	6397198	5533299	28517268	10609135	29092500
GNAI2	P04899;P04899-2;P04899-3;P04899-4;P04899-5;P04899-6	Guanine nucleotide-binding protein G(i) subunit alpha-2	0	0	0	0	0	0	0	0	0	0	0	0	0	0	0	0	0	0	0	215770137	488886661	423419840	481221703	466282616	350272034	127839120	101974791	2895220822	341124687	2409230855	324870398	848947287	441044794	279838803	62774833	62407806	3490131	50640059	106754240	44259457	23782240	55880888	21116319	11277104	183245183	140298417	29092500
GNAI3	P08754	Guanine nucleotide-binding protein G(i) subunit alpha-3	0	0	0	0	0	0	0	0	0	0	0	0	0	0	0	0	0	0	0	131376657	164459986	179162838	310399302	380247106	101909557	49438529	14465403	536856905	109651244	483724308	53909011	140115053	74440615	38276560	49298082	69686169	1579909	20137800	45285817	4395106	9441420	11930390	6397198	7117568	38441275	42327239	29092500
GNAO1	P09471;P09471-2	Guanine nucleotide-binding protein G(o) subunit alpha	0	0	0	0	0	0	0	0	0	0	0	0	0	0	0	0	0	0	0	131376657	134114627	117835778	310399302	380247106	1042277022	48887225	11909322	4160724534	709847444	4069849776	215621558	1389953541	119186156	160296339	49298082	62407806	1158274	7274714	19427303	3671684	6324320	165908121	6397198	5533299	21508137	19080916	29092500
GNAQ	P50148	Guanine nucleotide-binding protein G(q) subunit alpha	0	0	0	0	0	0	0	0	0	0	0	0	0	0	0	0	0	0	0	0	7994800	63489	0	0	12063000	0	0	827542993	15745085	813406378	12767758	168723710	6851500	0	0	0	0	0	0	0	0	0	0	0	0	0	0
GNAS	O95467;P63092;P63092-2;P63092-3;P63092-4;Q5JWF2;Q5JWF2-2	Neuroendocrine secretory protein 55; Guanine nucleotide-binding protein G(s) subunit alpha isoforms XLas; Protein ALEX; Guanine nucleotide-binding protein G(s) subunit alpha isoforms short	0	0	0	0	0	0	0	0	0	0	0	0	0	0	0	0	0	0	0	132023991	109090382	267667829	298542390	402486866	61664830	36314497	31938645	743509814	98474426	521599295	77517014	247213071	100635763	46407300	50270041	59818814	3268036	39107264	55976840	15262621	24058855	15429067	9861886	13744919	27831566	34273263	0
GNAZ	P19086	Guanine nucleotide-binding protein G(z) subunit alpha	0	0	0	0	0	0	0	0	0	0	0	0	0	0	0	0	0	0	0	0	13107000	13060000	0	0	11053000	0	0	286683000	9976900	128089000	2609200	25250800	5638500	0	2365800	0	0	0	0	0	0	0	0	0	0	0	0
GNB1	P62873;P62873-2	Guanine nucleotide-binding protein G(I)/G(S)/G(T) subunit beta-1	0	0	0	0	0	0	0	0	0	0	0	0	0	0	0	0	0	0	0	45632718	253787629	423562715	56375242	77669341	587315928	66232512	124128877	3613860462	570789691	5571868028	197528535	1480152286	398279974	329035328	26481868	71038643	39830689	107425934	216104563	164291931	106192010	573651425	97879057	117172662	230278955	187775929	0
GNB2	P62879;P62879-2	Guanine nucleotide-binding protein G(I)/G(S)/G(T) subunit beta-2	0	0	0	0	0	0	0	0	0	0	0	0	0	0	0	0	0	0	0	338941	120699893	144895789	1064379	8285080	64899153	6139544	22999657	1017658994	112914434	608830335	89316558	325077172	141999189	94880916	691516	825828	15074917	53840425	99603550	53904422	38075123	158133656	19295341	11626260	148756598	66531503	0
GNB4	Q9HAV0	Guanine nucleotide-binding protein subunit beta-4	0	0	0	0	0	0	0	0	0	0	0	0	0	0	0	0	0	0	0	338941	39619478	63483596	1064379	8285080	16818420	6139544	5920264	489629144	59995274	249804637	31073905	92160742	98547037	42335356	691516	825828	11868003	26029940	32841786	35143448	23358966	75044820	15473102	11626260	56011847	35095279	0
GNG12	Q9UBI6	Guanine nucleotide-binding protein G(I)/G(S)/G(O) subunit gamma-12	0	0	0	0	0	0	0	0	0	0	0	0	0	0	0	0	0	0	0	0	0	29667000	0	4255800	0	714860	2248500	325280000	0	23077000	6895500	1689400	7972600	17094200	0	0	4842600	7626510	25624000	28378000	5515800	60146000	6640700	9507800	20187100	645900	0
GNG2	P59768	Guanine nucleotide-binding protein G(I)/G(S)/G(O) subunit gamma-2	0	0	0	0	0	0	0	0	0	0	0	0	0	0	0	0	0	0	0	6254400	67095000	49317000	48127000	22524000	0	16318000	23659000	184211400	55734000	138075000	5457700	44969000	29419000	34182000	4698300	11398000	0	0	0	0	0	0	0	0	0	0	0
GNG3	P63215	Guanine nucleotide-binding protein G(I)/G(S)/G(O) subunit gamma-3	0	0	0	0	0	0	0	0	0	0	0	0	0	0	0	0	0	0	0	0	0	0	0	0	4560400	0	0	64623000	20297100	87165000	0	5008600	0	0	0	0	0	0	0	0	0	0	0	0	0	0	0
GNG7	O60262	Guanine nucleotide-binding protein G(I)/G(S)/G(O) subunit gamma-7	0	0	0	0	0	0	0	0	0	0	0	0	0	0	0	0	0	0	0	3661600	2013500	45635000	9266700	0	12992400	7175800	0	554676000	7683660	510846000	17627300	130479000	0	23335600	7586000	587150	248010	494190	539570	9249900	229660	76675400	361560	367260	11389200	3389170	0
GNL1	P36915;P36915-2	Guanine nucleotide-binding protein-like 1	0	0	0	0	0	0	0	0	0	0	0	0	0	0	0	0	0	0	0	0	0	0	0	0	0	0	0	0	0	0	0	0	0	0	0	0	0	0	0	1039000	0	9854000	0	0	4011790	8116700	0
GNPDA1	P46926;P46926-2	Glucosamine-6-phosphate isomerase 1	0	0	0	0	0	0	0	0	0	0	0	0	0	0	0	0	0	0	0	0	0	0	0	0	0	0	0	0	0	0	0	0	0	0	0	0	0	0	0	0	2547700	0	0	0	1979800	104755695	0
GNPDA2	Q8TDQ7;Q8TDQ7-2;Q8TDQ7-3;Q8TDQ7-4;Q8TDQ7-5	Glucosamine-6-phosphate isomerase 2	0	0	0	0	0	0	0	0	0	0	0	0	0	0	0	0	0	0	0	0	0	0	0	0	0	0	0	0	0	0	0	0	0	0	0	0	0	0	0	0	0	0	0	0	0	14793505	0
GNPTG	Q9UJJ9	N-acetylglucosamine-1-phosphotransferase subunit gamma	83964600	112403900	91707600	20489000	72756000	85729000	236976000	133918000	59467400	0	2618200	149349000	44275100	11061000	233992000	199186700	195169000	171679500	179683700	228782000	499871000	163588400	386904000	267210100	441394000	385184100	279326100	62676800	22636800	41823000	117991500	402607400	297097800	107714500	294589900	450463000	3627931400	2366538600	2188238900	2473670700	2766103900	2623982500	4818377000	4031632800	1803232000	363450000	15732600
GNS	P15586;P15586-2	N-acetylglucosamine-6-sulfatase	0	0	0	0	0	0	0	0	0	0	0	0	0	0	0	0	0	0	0	118140100	118968000	93091900	32000300	52465000	58167200	131216000	78385500	8989700	27617500	25742200	36166900	60321200	107353000	54143500	108605200	119721000	93974100	100289800	93510700	17675300	159815600	36047500	192796100	20186900	62069800	45686000	0
GOLIM4	O00461	Golgi integral membrane protein 4	38974000	12970100	7992600	0	10676000	14463900	16881000	14684000	23127600	13239900	0	0	0	0	35964000	0	16736000	0	6875600	10302800	5559200	0	122651000	16831500	41270000	31156600	3132300	5746980	4970000	2479800	2761030	19006500	6510700	9061800	7962700	8592100	623880500	280980100	206501530	1397579400	268376640	274265220	675621400	336030500	195865300	177390200	0
GOLM1	Q8NBJ4;Q8NBJ4-2	Golgi membrane protein 1	191506900	50981200	88494900	19131200	43597000	65665400	84900000	75543600	72395200	34970200	4573300	81976000	29706200	26552300	39102000	144290000	201049800	51856000	34916900	139919260	173570600	85146400	361557700	279085000	140620900	161102300	65825100	39524000	37075800	0	76518900	171016000	82307200	134947600	154791160	144730390	1607061300	973671500	1142388300	335252600	1284075200	496694000	1339046600	1491325400	680794750	653770900	36296900
GOLM2	Q6P4E1;Q6P4E1-2;Q6P4E1-5	Protein GOLM2	49972800	271930000	0	0	269161000	0	0	0	7707900	0	0	12351000	0	116480000	3113300	0	15282300	10151000	0	0	0	0	0	0	0	0	0	0	0	0	0	0	0	0	0	0	243002000	111209200	105142800	299310300	153183200	96252200	230129300	170634000	90507800	52038700	0
GOT1	P17174;P17174-2	Aspartate aminotransferase, cytoplasmic	762684000	174659900	178008000	473364000	350060000	296995000	990100000	453941400	305777600	531959300	77239000	665579000	133422800	127427100	541957000	377904000	923571600	375144700	409567000	1294351100	1210788600	360328700	2672990000	942921800	1485672000	1550707000	557875800	1042246000	682861300	1029266700	412274200	1601168000	551132300	368442600	676230200	631321100	312903560	116883920	68891220	378365710	166700820	108271220	365813300	77771070	41289780	178075400	267158800
GOT2	P00505;P00505-2	Aspartate aminotransferase, mitochondrial	36612000	0	0	0	18230000	0	4836700	0	0	98026300	0	0	0	0	5639200	0	19868000	10853000	0	96081700	34617100	0	23296600	236400000	90561400	36940800	20358000	542356000	135327300	324264700	15043000	202625000	84585600	160165500	7908200	14919000	0	0	0	0	0	0	0	0	0	0	0
GP1BA	P07359	Platelet glycoprotein Ib alpha chain	0	0	0	0	0	0	0	0	0	0	0	0	0	0	0	0	0	0	0	0	0	0	0	0	0	0	0	0	0	0	0	0	0	0	0	0	0	6044500	9783800	0	1392900	4724800	4146800	12220000	5379000	2876570	0
GPC1	P35052;P35052-2	Glypican-1	17968600	15483000	17441000	0	12800000	17607800	27254000	13824000	0	9172300	0	0	0	13313000	62351000	0	82009000	0	0	39827900	39082200	7830800	105142000	12459000	143783000	40376000	17562700	0	0	18960000	8687100	33269800	0	0	50817900	0	932209900	670567900	341788830	823649500	724884500	456670900	1298836900	516459200	247808800	104289480	0
GPC4	O75487;O75487-2	Glypican-4	0	0	0	0	0	0	0	0	0	0	0	0	0	0	0	0	0	0	0	0	0	0	0	0	0	0	0	0	0	0	0	0	0	0	0	0	291193987	222637641	254668459	233713096	141153445	109099378	270124096	183854750	164768078	9105870	0
GPC5	P78333	Glypican-5	0	0	0	0	0	0	0	0	0	0	0	0	0	0	0	0	0	0	0	0	0	0	0	0	0	0	0	0	0	0	0	0	0	0	0	0	51006100	5865848600	12085100	58230200	7719245100	21728100	7288252700	35656800	7907600	3571530	0
GPC6	Q9Y625	Glypican-6	0	0	0	0	0	0	0	0	0	0	0	0	0	0	0	0	0	0	0	0	0	0	0	0	0	0	0	0	0	0	0	0	0	0	0	0	52727613	18951059	30698541	43803404	11371355	8346922	42777604	17257250	5037622	0	0
GPD1	P21695;P21695-2	Glycerol-3-phosphate dehydrogenase [NAD(+)], cytoplasmic	0	0	0	0	0	0	0	0	0	0	0	0	0	0	0	0	0	0	0	0	0	0	0	0	8964000	0	0	147729300	0	114269500	0	43510600	0	0	0	0	0	0	0	0	0	0	0	0	0	0	0
GPD1L	Q8N335	Glycerol-3-phosphate dehydrogenase 1-like protein	0	0	0	0	0	0	0	0	0	0	0	0	0	0	0	0	0	0	0	0	0	0	0	0	0	0	0	7570800	11351200	8861800	0	6092900	0	0	0	0	0	0	0	0	0	0	0	0	0	0	0
GPD2	P43304;P43304-2	Glycerol-3-phosphate dehydrogenase, mitochondrial	0	0	0	0	0	0	0	0	0	0	0	0	0	0	0	0	0	0	0	0	0	0	0	0	30930000	0	0	100456000	0	69626000	0	0	0	0	0	0	0	0	0	0	0	0	0	0	0	0	0
GPHN	Q9NQX3;Q9NQX3-2	Gephyrin	0	0	0	0	0	0	0	0	0	0	0	0	0	0	0	0	0	0	0	0	0	0	0	0	0	0	0	0	0	0	0	0	0	0	0	0	8379600	9249600	5774900	27462000	1826500	28489000	35768000	9017200	514160	0	0
GPI	P06744;P06744-2	Glucose-6-phosphate isomerase	34398400	0	18341800	8836600	19433800	120465000	24414000	60709000	21878400	860617500	89902100	53190000	54969200	99505400	61752000	122668100	42495300	2988500	5152200	51605900	195459900	126134300	25876000	63188000	207497800	68855300	93166200	1021064000	390011000	559609300	51760300	390239000	222609700	101162600	28611900	123650300	17405900	15682300	15307090	15585200	33665900	16440800	16784380	48782500	48886700	258436500	0
GPLD1	P80108;P80108-2	Phosphatidylinositol-glycan-specific phospholipase D	18197000	7101700	0	0	12215100	0	38515200	31553100	4023800	0	24155700	0	21462300	0	17407000	20696900	17405900	0	37994100	28030200	26886000	11300600	63285000	126677800	37082000	36842500	19728600	0	0	9570800	6320300	20853700	0	3829100	20791600	50778000	569708000	395313900	511458100	260751700	628755200	248842800	924375600	669136500	363670700	46127210	5967900
GPM6A	P51674;P51674-2;P51674-3	Neuronal membrane glycoprotein M6-a	0	0	0	0	0	0	0	0	0	0	0	0	0	0	0	0	0	0	0	2686300	26582100	134752000	4190400	15825000	27878800	9824700	31775000	571797000	113699000	488734000	11333800	37294400	31633000	48269000	5346700	8408600	132401000	450817000	667714000	87042000	378709000	180793000	168066000	203399800	396242000	146252000	1042700
GPM6B	Q13491;Q13491-2;Q13491-3;Q13491-4	Neuronal membrane glycoprotein M6-b	0	0	0	0	0	0	0	0	0	0	0	0	0	0	0	0	0	0	0	0	0	0	0	0	8937700	0	0	290770400	18819800	56693000	15448000	25930000	0	0	0	0	0	0	0	0	0	0	0	0	0	0	0
GPNMB	Q14956;Q14956-2	Transmembrane glycoprotein NMB	3654300	0	12254000	0	0	37090000	12821000	32825000	0	0	0	0	3895300	0	200535000	14928000	8198800	11367000	10497000	0	0	0	0	0	0	0	0	0	0	0	0	0	0	0	0	0	67331500	190513000	270883000	83807000	251397000	168922800	172826400	186072800	100819900	108749000	0
GPR158	Q5T848	Probable G-protein coupled receptor 158	0	0	0	0	0	0	0	0	0	0	0	0	0	0	0	0	0	0	0	74099000	19959700	25073200	73815000	0	47109000	105696000	34923700	4589300	1997700	25456000	24544000	27631000	30179100	40115000	29574000	95086000	0	0	0	0	0	0	0	0	0	0	0
GPR37	O15354	Prosaposin receptor GPR37	232188000	158276000	50350100	106893000	175251000	96368800	127836000	113681000	70393000	88937000	0	103232000	44619200	160653000	10143000	59853000	283368000	143325000	59551000	195895000	168785600	70220000	631045000	99421000	218121000	267706500	91216000	20553300	32812500	28666800	47116000	329754000	116748000	74541000	146892100	222068800	82217000	59097400	62784000	101311700	51072200	36514600	133176500	41210700	28732300	20484600	22941000
GPR37L1	O60883	G-protein coupled receptor 37-like 1	201360900	109960000	111513700	21070000	113070000	22096000	28213000	113319000	109150000	65111000	0	199315000	60281000	81615400	18007000	273964000	156882000	107038400	99600000	20926000	16029800	2658300	17477000	0	6721600	8088400	0	0	1266300	0	0	8506500	0	21231000	0	0	2528600	11232800	6738700	0	21161800	0	4086400	2857100	3329300	134925200	0
GPS1	Q13098;Q13098-5;Q13098-6;Q13098-7	COP9 signalosome complex subunit 1	0	0	0	0	0	0	0	0	0	0	0	0	0	0	0	0	0	0	0	0	0	0	0	0	0	0	0	0	0	0	0	0	0	0	0	0	0	5451300	0	10939900	2393300	109654500	42846000	11296000	161022100	87690380	0
GPX1	P07203;P07203-2	Glutathione peroxidase 1	0	0	0	0	0	0	0	0	16386300	0	11836700	0	5007100	0	0	0	0	0	0	0	0	21271300	0	0	10874000	0	0	63915000	0	75995000	5890300	19399200	30807700	6113100	0	0	878040	5766010	58854500	103108400	62824900	428856300	42154500	8448400	619052100	30781030	0
GPX3	P22352	Glutathione peroxidase 3	473985300	368333000	842793000	260808700	551267800	394806000	691940000	787011000	596143000	417074200	158694000	1001716000	592295000	182131800	871684000	1623816000	724217000	439924000	609347000	558135000	718813100	265768000	768487000	704442000	647950000	582083100	363655400	170441000	171855000	136410000	205112000	537737300	329866000	491461300	325658000	469096000	2252550000	1990150000	2563170000	2254020000	2753830000	1886520000	2671860000	3136710000	2020060000	2847150000	86769000
GPX4	P36969;P36969-2	Phospholipid hydroperoxide glutathione peroxidase	0	0	0	0	0	0	0	0	0	0	0	0	0	0	0	0	0	0	0	0	0	31746100	0	0	0	0	3024000	76100000	5646900	30044000	644550	16096000	5804900	0	0	0	0	2541800	9969700	7845300	5610700	27106200	0	1210000	47021000	14510000	0
GRB2	P62993;P62993-2	Growth factor receptor-bound protein 2	0	0	0	0	0	0	0	0	0	13954000	0	0	0	0	0	0	0	0	0	9860400	6124700	1756100	20081200	2183600	2969500	24599880	0	21693600	133877200	45908200	0	18785400	23075400	0	4580300	0	104428100	54642500	54803440	13184200	145214900	99677000	76279200	50506500	56976300	460914200	0
GRHPR	Q9UBQ7;Q9UBQ7-2	Glyoxylate reductase/hydroxypyruvate reductase	0	0	0	0	0	0	0	0	0	22946000	4647500	0	0	15179000	0	0	0	0	0	0	0	15011000	0	0	0	0	8975000	235117400	61856700	262948500	14118000	80275000	29388500	34938000	0	0	6882600	0	21298300	29239000	69831880	190216000	14964220	13375000	271193000	728158000	0
GRIA2	P42262;P42262-2;P42262-3;P42262-4	Glutamate receptor 2	0	0	0	0	0	0	0	0	0	0	0	0	0	0	0	0	0	0	0	0	0	0	0	0	0	0	0	0	0	0	0	0	0	0	0	0	122502600	69899900	9567700	65469700	44388180	66913500	157135700	19841300	7309200	0	0
GRIA4	P48058;P48058-2	Glutamate receptor 4	82953800	34157500	11739000	111162000	28017000	197418000	301517700	0	29812000	0	0	10367000	13895000	8681900	96548000	0	142917700	33502100	0	63098100	43489900	10018900	135927400	41161000	128657700	135034200	13176100	2761900	0	0	7438800	99311000	20965700	3413300	152481300	30046000	1979007600	1285122100	320250400	474456500	1172105560	1288469400	2009655600	809336010	642846300	6943930	14503600
GRIPAP1	Q4V328;Q4V328-2;Q4V328-3;Q4V328-4	GRIP1-associated protein 1	0	0	0	0	0	0	0	0	0	0	0	0	0	0	0	0	0	0	0	0	0	0	0	0	0	0	0	0	0	0	0	0	0	0	0	0	0	0	0	0	0	0	0	0	403990	34929040	0
GRN	P28799;P28799-2;P28799-3	Progranulin	37592000	82631900	72797400	19237000	92949500	0	15433000	69549300	0	100853500	0	97048100	66794100	48650800	80705000	92634000	158537000	34068200	150045000	87508700	146908800	89730600	228651100	205097300	298735000	123886300	50025500	170055100	25159000	87136900	85102200	423442800	60369500	104498600	73313400	111829800	6027100	8244500	10564300	15948500	8037600	33734300	24092250	19389500	6179700	76168000	34194810
GSDMA	Q96QA5	Gasdermin-A	0	0	0	0	0	0	0	0	0	0	0	0	0	0	0	0	0	0	0	0	1209900	0	0	0	0	0	29636900	0	0	0	0	0	0	0	0	0	0	0	0	0	0	0	0	0	0	0	5015900
GSN	P06396;P06396-2;P06396-3;P06396-4	Gelsolin	31413418700	21260070660	25332633000	35944502000	31973950100	22380524200	24380514800	25839023800	23902921850	6470837300	3423328800	35371300500	15743874000	9561226100	36500282000	51468906300	32236475630	22854657400	22690429480	20998994060	23908354630	10884759400	41171064460	17613232510	24822183410	24015462830	12144431730	12046598100	3926532900	8076772200	12346841390	28257317390	16036513910	22331330910	19660765360	25149097210	186718582700	181872942400	199584369000	142189268000	191416008800	102478044500	200320398000	195345380000	211369293400	86234458200	6623451000
GSPT1	P15170;P15170-2;P15170-3	Eukaryotic peptide chain release factor GTP-binding subunit ERF3A	0	0	0	0	0	0	0	0	0	0	0	0	0	0	0	0	0	0	0	0	0	0	0	0	0	0	0	0	0	0	0	0	0	0	0	0	0	0	0	2565700	287190	17638900	0	0	29455000	61655600	0
GSR	P00390;P00390-2;P00390-3;P00390-4;P00390-5	Glutathione reductase, mitochondrial	12049000	0	0	0	0	0	0	0	0	67517000	14645000	0	0	13804000	0	37406000	0	0	0	3100300	9121400	26387800	8389300	18141400	29502000	4105800	6785400	80055600	48558300	100958000	14843800	17400000	28905900	30488800	6911200	6862500	0	0	0	0	0	3914100	0	0	15745900	92964300	0
GSS	P48637;P48637-2	Glutathione synthetase	0	0	0	19262000	0	0	0	0	0	16510900	0	0	0	0	24850000	32557000	7950500	0	0	5074100	9127600	0	0	0	3942200	7156000	8179200	48597000	7914200	5545800	1100200	16787000	0	0	0	0	0	0	0	0	0	0	0	0	0	0	0
GSTM1	P09488;P09488-2	Glutathione S-transferase Mu 1	0	0	0	0	0	0	0	0	0	76292473	0	0	0	15052000	0	0	0	0	0	0	0	7690827	0	0	0	0	450986	42873876	191512670	0	0	18083230	0	0	0	0	0	0	9557364	1654022	40469	926698	2692073	0	23073074	2831110603	0
GSTM2	P28161;P28161-2	Glutathione S-transferase Mu 2	0	0	0	0	0	0	0	0	0	0	0	0	0	0	0	0	0	0	0	2305000	5492263	9257166	4406935	5187781	13158182	2601800	7627069	47407236	22898374	15767122	3843978	35801869	4253914	11315958	0	2687660	3933036	11704675	24190894	19405590	14890856	38187234	11807512	2145455	24729880	171375795	0
GSTM3	P21266	Glutathione S-transferase Mu 3	0	0	0	0	0	0	0	0	0	0	0	0	0	0	0	0	0	0	0	2305000	517357037	392775281	81481065	239367219	46434818	2601800	311970859	209731112	40066851	172211878	28566322	39656179	290372686	98394542	0	63830640	9024794	44078425	32298553	32924166	28088706	94429770	14930441	22732145	89795069	21753152	0
GSTM4	Q03013;Q03013-2;Q03013-3	Glutathione S-transferase Mu 4	0	0	0	0	0	0	0	0	0	33983727	0	0	0	15052000	0	0	0	0	0	0	0	7690827	0	0	0	0	450986	42873876	130864905	0	0	14925021	0	0	0	0	0	0	8862919	1654022	40469	926698	2692073	0	31041477	1585506289	0
GSTO1	P78417;P78417-2;P78417-3	Glutathione S-transferase omega-1	3199600	0	9947500	14652000	0	32046000	19155200	0	27855000	12234700	32405700	5359800	99970400	0	20162200	40159400	0	0	0	14041200	42798900	26567300	63604200	20132400	140880200	14634700	10675700	133740000	64440000	395383000	25901900	101356800	29711400	49534200	0	6292400	54491300	163147000	70779200	371738500	186701500	185853700	142817400	74180000	485828600	492029750	1361100
GSTP1	P09211	Glutathione S-transferase P	82699200	0	63301000	111004300	145379000	200677000	83493000	76705000	74916000	457115900	88242200	86692000	34054300	707424000	61277000	98376000	88787000	86609000	42957600	182139300	959032000	770485200	331221000	588683000	361283000	254142000	529946000	1183215000	255221000	1040935800	211287000	1725068000	745687800	448078000	150420000	353133000	500209900	487624400	687389500	422520900	1190257000	586374600	757963000	674335300	857925400	3583042000	17305000
GTF2I	P78347;P78347-2;P78347-3;P78347-4;P78347-5	General transcription factor II-I	0	0	0	0	0	0	0	0	0	0	0	0	0	0	0	0	0	0	0	0	0	0	0	0	0	0	0	0	0	0	0	0	0	0	0	0	0	0	0	0	0	0	0	0	0	26146700	0
GUK1	Q16774;Q16774-2;Q16774-3	Guanylate kinase	0	0	0	0	0	0	0	0	0	0	0	0	0	0	0	0	0	0	0	0	0	0	0	0	0	0	0	59784500	1551800	72418000	0	0	0	0	0	0	0	0	0	0	0	0	0	0	0	0	0
GYG1	P46976;P46976-2;P46976-3	Glycogenin-1	0	0	0	0	0	0	0	0	0	0	0	0	0	0	0	0	0	0	0	0	0	0	0	0	0	0	0	0	0	0	0	0	0	0	0	0	6465400	0	2553300	4534800	9372100	43942900	6777200	2523000	7661500	3218500	0
GYPA	P02724;P02724-2;P02724-3	Glycophorin-A	0	0	0	0	0	0	0	0	0	0	0	0	0	0	0	0	0	0	0	241599000	783505400	0	3283670000	40286000	11133968800	133073000	475540000	11588128500	34432800	1326626000	1649935500	3189469000	178180000	2304987550	2890900	149440000	0	0	0	0	0	0	0	0	0	0	0
GYPC	P04921;P04921-2;P04921-3	Glycophorin-C	0	0	0	0	0	0	0	0	0	0	0	0	0	0	0	0	0	0	0	0	13621000	0	197706000	0	1143450000	0	7498400	1420540000	0	1584210000	117984000	172027000	0	259035000	0	0	0	0	0	0	0	0	0	0	0	0	0
H1-0	P07305;P07305-2	Histone H1.0	0	0	0	0	0	0	0	0	0	0	0	0	0	0	0	0	0	0	0	0	0	0	0	0	0	0	0	43770000	14219200	66255000	0	0	0	0	0	0	0	0	1087400	50840900	399730	35508200	36651000	5147700	90063800	21644400	0
H1-2	P16403	Histone H1.2	0	0	0	0	0	4961000	0	0	3765600	87523500	6179500	0	0	0	0	0	0	0	0	5109234	27127235	17631120	32157000	13130000	185915033	19660654	0	521768654	195283081	323546190	18355025	7638301	38073942	61393178	654100	2548806	24309400	12546233	46510333	92736001	8329447	205448274	76245333	7977100	245990000	217343666	0
H1-3	P16402	Histone H1.3	0	0	0	0	0	0	0	0	0	0	0	0	0	0	0	0	0	0	0	5109234	10495382	17631120	32157000	13130000	180948039	14484624	0	407151722	131026981	290152635	15494805	7638301	51691226	64561621	654100	2548806	24309400	12546233	46510333	92736001	8329447	205448274	76245333	7977100	245990000	217343666	1890300
H1-4	P10412	Histone H1.4	0	0	0	0	0	4961000	0	0	3765600	110678000	6179500	0	0	23789000	0	0	0	0	0	5109234	10495382	37705959	32157000	13130000	143064527	14484624	0	385346125	131597639	314561775	31500871	7638301	45484631	40760402	654100	2548806	24309400	12546233	46510333	92736001	8329447	208728252	76245333	7977100	245990000	217343666	0
H1-5	P16401	Histone H1.5	0	0	0	0	0	0	0	0	0	195196000	0	0	0	0	0	19333000	0	0	0	4059000	8676900	46443000	0	0	261162800	10549410	0	282601000	941418200	164052000	13854200	4511500	55405600	369794600	0	2190400	0	0	47508400	20914200	1024800	204146000	53712800	0	273164000	596076000	0
H2AC12;H2AC14;H2AC17;H2AC7;H2AJ	Q96KK5;Q99878;P0C0S8;P20671;Q9BTM1;Q9BTM1-2	Histone H2A type 1-H; Histone H2A type 1-J; Histone H2A type 1; Histone H2A type 1-D; Histone H2A.J	0	0	572600	0	0	0	0	0	14080500	26312083	1663150	0	0	3722753	0	2920750	0	0	0	17647901	110779990	400306161	248382798	721900	1063908181	180014219	0	2633829207	5703875354	2513281496	158877951	316299005	971372646	1746464573	4438600	4393200	14082220	10294501	50569536	30062515	10427756	588280167	66298567	2352100	580279584	924411986	4039667
H2AC19;H2AC20	Q6FI13;Q16777	Histone H2A type 2-A; Histone H2A type 2-C	0	0	572600	0	0	0	0	0	14080500	26312083	1663150	0	0	3722753	0	2920750	0	0	0	17647901	110779990	400306161	248382798	721900	1063908181	180014219	0	2721968237	5703875354	2531250371	158877951	316299005	971372646	1746464573	4438600	4393200	14082220	10294501	50569536	30062515	10427756	588280167	66298567	2352100	579869639	914088111	4039667
H2AC6;H2AC8;H2AW	Q93077;P04908;Q7L7L0	Histone H2A type 1-C; Histone H2A type 1-B/E; Histone H2A type 3	0	0	572600	0	0	0	0	0	0	27518733	0	0	0	17578741	0	0	0	0	0	17647901	110779990	390485121	248382798	721900	1037355489	177010285	0	2493150628	5452681166	2460188836	158877951	316299005	901521461	1681557924	4438600	4393200	14082220	10294501	50569536	30062515	10427756	588280167	66298567	2352100	580279584	924411986	4039667
H2AX	P16104	Histone H2AX	0	0	572600	0	0	0	0	0	0	11785102	0	0	0	3722753	0	0	0	0	0	3528648	11620016	18631777	24045444	721900	411477649	10066509	0	1104458370	1111257175	2800578063	21574179	34532900	166283514	258909308	4438600	4393200	11646370	6327748	28432879	24276726	4071715	165103750	25521150	2352100	161262301	122293242	0
H2AZ1;H2AZ2	P0C0S5;Q71UI9;Q71UI9-2;Q71UI9-3;Q71UI9-4;Q71UI9-5	Histone H2A.Z; Histone H2A.V	0	0	0	0	0	0	0	0	0	0	0	0	0	0	0	0	0	0	0	3528648	11620016	12440679	17316161	721900	114762200	5147268	0	164353960	214472952	338073133	3483966	24510088	22291534	41403422	4438600	4393200	11646370	6327748	30659712	24276726	4071715	161170850	25521150	2352100	178348570	135133676	0
H2BC10;H2BC12;H2BC14;H2BC15;H2BC18;H2BC5;H2BC9	P62807;O60814;Q99879;Q99877;Q5QNW6;Q5QNW6-2;P58876;Q93079	Histone H2B type 1-C/E/F/G/I; Histone H2B type 1-K; Histone H2B type 1-M; Histone H2B type 1-N; Histone H2B type 2-F; Histone H2B type 1-D; Histone H2B type 1-H	0	0	0	0	0	11480500	0	0	43397319	133178607	8803400	0	11852000	0	0	14166000	0	0	0	24237524	105574773	164801371	186216363	0	659682304	99828713	0	1340285543	2431603066	1724876950	42104344	286983976	379215607	389799171	6565500	25671392	87675202	30268552	160071910	185664197	18060224	2441177972	188938976	12000311	2324530320	2714442202	4917150
H2BC11;H2BC17;H2BC21;H2BC3	P06899;P23527;Q16778;P33778	Histone H2B type 1-J; Histone H2B type 1-O; Histone H2B type 2-E; Histone H2B type 1-B	0	0	0	0	0	11480500	0	0	20243681	51351393	0	0	0	0	0	0	0	0	0	18928076	59670827	86267629	80817637	0	437369096	35840287	0	1100210857	1604784834	1610820850	37655056	199814734	263024393	281652329	6565500	16582108	75337298	24322548	77816090	99477803	13413276	1948642028	131395324	7833489	1608509680	2043767798	4917150
H3-3B	P84243	Histone H3.3	0	0	0	0	0	0	0	0	3897000	6449034	2242433	0	0	0	0	0	0	0	0	8072816	238499036	62101005	44430012	0	900050805	22031952	0	1761916406	1005836746	6744257286	180373315	760759328	609623737	303821884	1677468	2230900	0	0	0	0	0	0	0	0	0	0	2019020
H3-7	Q5TEC6	Histone H3-7	0	0	0	0	0	0	0	0	0	0	0	0	0	0	0	0	0	0	0	3395154	18724615	52119389	69934963	0	180462174	10853144	0	487480002	668667457	721835201	15533955	106878100	130366847	203848908	1252355	2230900	35774700	7944600	106815000	105002000	17022000	1009640000	108938800	4586000	677390000	881430000	540640
H3C12	P68431	Histone H3.1	0	0	0	0	0	0	0	0	3897000	6449034	2242433	0	0	0	0	0	0	0	0	8072816	78637237	140410601	44430012	0	716495382	22031952	0	1562680665	2075116688	937552772	71045792	31870286	346787095	575881728	1677468	2230900	0	0	0	0	0	0	0	0	0	0	2019020
H3C13	Q71DI3	Histone H3.2	0	0	0	0	0	0	0	0	3897000	6449034	2242433	0	0	0	0	0	0	0	0	8072816	21470812	62101005	44430012	0	73178639	22031952	0	418919929	764493110	487831742	12344638	31870286	144717321	250339279	1677468	2230900	0	0	0	0	0	0	0	0	0	0	2019020
H4-16	P62805	Histone H4	0	0	0	0	0	51012500	0	0	53984200	221355700	90155000	0	25842500	7741500	0	27876100	0	0	0	48372000	377671900	819632000	453652700	18649100	2369263000	253385100	4413300	7233980000	11011475000	7230076800	196752000	1292953000	2182420600	2962444300	8516200	32490000	146124900	48451600	370231300	356616330	43005900	3915154000	421102500	15320570	4446733000	3835877900	15551700
HABP2	Q14520;Q14520-2	Hyaluronan-binding protein 2	126646200	118033000	232962800	211621600	34794000	53597000	308010000	224620900	19453000	3090200	14361300	249483000	89854300	14477600	183359100	132415000	174259100	25658200	212878000	338302500	783407500	397241300	910143800	1515903300	704609500	708208500	690319900	51783700	22214600	187976900	416783200	1072263200	324202100	449448700	432114200	1250097800	3600518900	5808483300	6014266000	14422610000	2544631200	5830750800	10036745400	11346482000	3165340000	551334300	270950
HADH	Q16836;Q16836-2;Q16836-3	Hydroxyacyl-coenzyme A dehydrogenase, mitochondrial	0	0	0	0	0	0	0	0	0	0	0	0	0	0	0	0	0	0	0	0	0	0	0	0	0	0	0	0	0	0	0	0	0	0	0	0	0	0	0	0	0	0	0	0	0	151228500	0
HADHA	P40939	Trifunctional enzyme subunit alpha, mitochondrial	0	0	0	0	0	0	0	0	0	0	0	0	0	0	0	0	0	0	0	0	0	0	0	0	0	0	0	502751000	4863900	311870700	0	53609900	7592700	0	0	0	79837000	72658000	20635000	135390000	14355000	60311920	48776000	38893000	12791500	15287500	0
HADHB	P55084;P55084-2	Trifunctional enzyme subunit beta, mitochondrial	0	0	0	0	0	0	0	0	0	0	0	0	0	0	0	0	0	0	0	0	0	0	0	0	0	0	0	289313000	11261900	145313000	0	68436000	7375300	0	0	0	0	0	0	0	0	0	0	0	0	0	0
HAGH	Q16775;Q16775-2;Q16775-3	Hydroxyacylglutathione hydrolase, mitochondrial	0	0	0	0	0	0	0	0	7972100	0	20808300	0	0	0	0	0	0	0	0	1330500	0	0	1708900	0	8238600	0	0	46553400	0	69913000	0	4538100	0	4673300	0	0	0	0	0	1716600	804220	25265400	0	1016200	58879000	4434500	0
HAL	P42357;P42357-2;P42357-3	Histidine ammonia-lyase	0	0	0	0	0	0	0	0	0	0	0	0	0	0	0	0	0	0	0	0	2393200	0	0	0	0	0	232191700	0	2102220	0	0	0	0	1992400	0	0	0	0	0	0	0	0	0	0	0	0	0
HAPLN1	P10915	Hyaluronan and proteoglycan link protein 1	0	0	0	0	0	0	0	0	0	0	0	0	0	0	0	0	0	0	0	0	0	0	0	0	0	0	0	0	0	0	0	0	0	0	0	0	10349100	0	0	6956900	0	19356500	38123100	0	0	1974300	0
HAPLN2	Q9GZV7	Hyaluronan and proteoglycan link protein 2	0	0	0	0	0	0	0	0	0	0	0	0	0	0	0	0	0	0	0	5636000	8188100	0	0	0	4140100	0	4386500	465712100	4442800	298280500	5043100	110963200	1685000	1920500	0	0	21404190	17330660	10923970	50374800	17439840	57661300	57893200	37034500	72153100	6685300	0
HAPLN3	Q96S86	Hyaluronan and proteoglycan link protein 3	0	0	0	0	0	0	0	0	0	0	0	0	0	0	0	0	0	0	0	0	0	0	0	0	0	0	0	0	0	0	0	0	0	0	0	0	4612400	0	0	0	1536500	9583300	18002000	2501100	0	286410	0
HARS1	P12081;P12081-2;P12081-3;P12081-4	Histidine--tRNA ligase, cytoplasmic	0	0	0	0	0	0	0	0	0	0	0	0	0	0	0	0	0	0	0	0	0	0	0	0	0	0	0	0	0	0	0	0	0	0	0	0	8492320	525520	8761620	22748900	14445900	113128400	11635600	5560300	32735530	333505300	0
HAVCR2	Q8TDQ0;Q8TDQ0-2	Hepatitis A virus cellular receptor 2	27825000	24186000	0	82812000	24743000	12387800	12073000	0	0	50758000	0	0	10760000	16268000	98185000	11525000	37018000	51710000	0	0	0	0	0	0	0	0	0	0	0	0	0	0	0	0	0	0	16704100	93189700	38033500	4127900	67201200	10402500	15469900	9397600	46415600	359239000	0
HBA2	P69905	Hemoglobin subunit alpha	39074000	30194800	263542000	50612976000	1420451400	145408428500	2262484000	11991665000	274906324100	8194095000	332776957000	27788908100	283911702000	91319933200	1438668000	213225967000	474346000	85041300	133149000	944828000	4572837870	55638300	58951828700	2925228000	218012151000	1436764000	4003331000	174523942000	2940339400	463234492000	32582252200	66143049000	7710567900	90064198300	113914000	26100700	621432000	192454000	88809500	551410674600	423395000	409128608600	2792011000	83328439920	459064105800	111198421150	266388700
HBB	P68871	Hemoglobin subunit beta	61362909	31432000	177747371	65236157785	768303301	120874824076	3497667640	20081849101	377607310985	8942593610	359716954662	36438316873	358262388089	135695031869	2241794126	282301410982	473710538	340667198	128431734	1744612532	7145942213	164196748	99061073854	4419801883	350172121283	2762764472	5966623412	220540184174	4346590045	605676967855	58225026075	96246654231	9824970413	133070192820	426248116	86657763	276449607	93897131	45179988	332851419372	209323365	291401519454	1633838535	62319902864	422490358883	91813527348	406266559
HBD	P02042	Hemoglobin subunit delta	1273073	0	5167847	6090683072	33209967	20047460013	256290412	1505234222	56013001103	696863533	46822247410	5327257509	50329407892	8177882911	178139164	35522869989	79819911	59305394	6445469	177695355	1044063699	9526129	11875216629	467760238	51437627663	312963118	878630439	28224091900	500243105	105032764024	6364955399	14222492753	1296307845	15562372917	18418741	3120990	73676070	24872194	16024112	52520979793	32182537	47864606757	364942287	10076321880	57988055376	16590134231	54918996
HBE1	P02100	Hemoglobin subunit epsilon	1273073	0	2437094	948507580	8010577	2610861694	34185682	336524892	3332639598	230494521	4004311961	984921951	3349856562	1868848407	41265670	2357947888	12551517	10178803	2509399	27229859	123845188	1126008	359403509	27434572	2953945758	71282837	129376200	2108837577	49089447	4850652946	750668320	1570741005	159224781	1547069682	3518485	2243749	9328674	401092	0	2539339685	730732	2929611949	30571392	1079596486	5007949624	1421642028	10790782
HBG1	P69891	Hemoglobin subunit gamma-1	1273073	0	2437094	974159782	8010577	2730467477	34185682	336524892	3519889472	238127368	7656812794	982120184	4276221959	1868848407	41265670	3751927721	12551517	10178803	2509399	28277927	154514450	1126008	690768996	51190553	3096506557	71282837	129376200	2156127489	50608966	9362738083	760098103	1570741005	159224781	1846064796	3518485	2243749	9328674	401092	0	6926436129	730732	3120162016	30571392	1084328405	5269029987	1498228073	10790782
HBG2	P69892	Hemoglobin subunit gamma-2	1273073	0	2437094	974159782	8010577	2708379740	34185682	336524892	3492372842	238127368	8204379173	982120184	4520021897	1868848407	41265670	3939340420	12551517	10178803	2509399	28277927	154514450	1126008	645430012	51190553	3047348440	71282837	129376200	2139471860	50608966	9972579293	760098103	1570741005	159224781	1837382085	3518485	2243749	9328674	401092	0	6387485020	730732	3079209323	30571392	1084328405	5211468531	1477520720	10790782
HBQ1	P09105	Hemoglobin subunit theta-1	0	0	0	0	0	0	0	0	0	0	14787600	0	11602000	0	0	0	0	0	0	0	0	0	0	0	0	0	0	0	0	0	0	0	0	0	0	0	0	0	0	14467600	0	57090800	0	1882700	103398000	0	0
HCFC1	P51610;P51610-2;P51610-3;P51610-4	Host cell factor 1	0	0	0	0	0	0	0	0	0	0	0	0	0	0	0	0	0	0	0	0	0	0	0	0	0	0	0	0	0	0	0	0	0	0	0	0	0	0	0	0	0	0	0	0	0	22366700	0
HCLS1	P14317;P14317-2	Hematopoietic lineage cell-specific protein	0	0	0	0	0	0	0	0	0	36993400	0	0	0	0	0	0	0	0	0	0	0	0	0	0	0	0	0	0	19413400	0	0	0	0	0	0	0	0	0	19489600	7799200	26672340	17320700	6176580	0	20382800	349609600	0
HCRT	O43612	Orexin	0	9342100	6008200	0	18653000	0	0	0	0	9696100	0	0	0	0	5215500	7966800	0	9878800	0	0	0	0	0	0	0	0	0	0	0	0	0	0	0	0	0	0	0	0	0	0	0	0	0	0	0	0	0
HDAC1	Q13547	Histone deacetylase 1	0	0	0	0	0	0	0	0	0	0	0	0	0	0	0	0	0	0	0	0	0	0	0	0	0	0	0	0	0	0	0	0	0	0	0	0	0	0	1020500	0	1447000	1303000	11105000	437600	5438400	49109500	0
HDAC11	Q96DB2;Q96DB2-2	Histone deacetylase 11	0	0	0	0	0	0	0	0	0	0	0	0	0	0	0	0	0	0	0	99189000	38316000	0	3570300	0	143630000	190680000	15168000	25838500	0	57118000	0	53754000	0	0	0	131180000	0	0	0	0	0	0	0	0	0	0	0
HDDC2	Q7Z4H3;Q7Z4H3-2;Q7Z4H3-3	5`-deoxynucleotidase HDDC2	0	0	0	0	0	0	0	0	0	0	0	0	0	0	0	0	0	0	0	0	0	0	0	0	0	0	0	0	0	0	0	0	0	0	0	0	0	0	0	2007400	3543300	0	0	814920	1962400	41233100	0
HDGF	P51858;P51858-2;P51858-3	Hepatoma-derived growth factor	0	0	0	0	0	0	0	0	0	25228700	0	0	0	0	0	0	0	0	0	0	0	0	0	0	0	0	0	0	0	0	0	0	0	0	0	0	1205500	0	28743900	90467000	35837400	239657200	56435600	5671230	241901900	1747348500	0
HDGFL2	Q7Z4V5;Q7Z4V5-2;Q7Z4V5-3;Q7Z4V5-4	Hepatoma-derived growth factor-related protein 2	0	0	0	0	0	0	0	0	0	0	0	0	0	0	0	0	0	0	0	0	0	0	0	0	0	0	0	0	0	0	0	0	0	0	0	0	0	0	0	0	0	0	0	0	0	65540779	0
HDGFL3	Q9Y3E1	Hepatoma-derived growth factor-related protein 3	0	0	0	0	0	0	0	0	0	0	0	0	0	0	0	0	0	0	0	0	0	0	0	0	0	0	0	0	0	0	0	0	0	0	0	0	0	0	0	5012700	538150	45315000	0	0	0	189149121	0
HDHD2	Q9H0R4;Q9H0R4-2	Haloacid dehalogenase-like hydrolase domain-containing protein 2	0	0	0	0	0	0	0	0	0	0	0	0	0	0	0	0	0	0	0	0	0	0	0	0	0	0	0	0	0	0	0	0	0	0	0	0	0	1639600	0	0	1236100	0	0	0	2153300	80405500	0
HDHD5	Q9BXW7;Q9BXW7-2	Haloacid dehalogenase-like hydrolase domain-containing 5	0	0	0	0	0	0	0	0	0	0	0	0	0	0	0	0	0	0	0	0	0	0	0	0	0	0	0	0	0	0	0	0	0	0	0	0	0	0	0	0	0	0	0	0	0	5454100	0
HEBP1	Q9NRV9	Heme-binding protein 1	0	0	0	0	0	0	0	0	0	0	0	0	0	0	0	0	0	0	0	5397600	7026100	1946600	10869000	0	83464000	4314500	0	149020000	0	305833000	0	116386000	3684300	11494500	0	0	0	0	5404700	8601200	7078000	9367300	0	1645000	22003800	0	0
HEBP2	Q9Y5Z4;Q9Y5Z4-2	Heme-binding protein 2	0	0	0	0	0	0	0	0	0	0	0	0	0	0	0	0	0	0	0	0	0	0	0	0	0	0	0	0	0	0	0	0	0	0	0	0	0	0	0	0	0	0	0	0	0	24864000	0
HEG1	Q9ULI3;Q9ULI3-2	Protein HEG homolog 1	0	0	0	0	0	0	0	0	0	0	0	0	0	0	0	0	0	0	0	0	0	0	0	0	0	0	0	0	0	0	0	0	0	0	0	0	86445000	57442600	31215800	18347400	52949800	9871600	81182000	29455200	24676200	16780670	0
HEPACAM	Q14CZ8;Q14CZ8-2	Hepatocyte cell adhesion molecule	14190500	0	0	0	8984000	0	0	0	0	0	0	0	0	0	10971000	0	8881600	0	0	0	3729300	0	6262200	0	66586600	7423700	0	442627000	9727800	349453000	28787590	200874000	0	0	0	0	0	0	0	0	0	0	0	0	0	0	0
HEPH	Q9BQS7;Q9BQS7-2;Q9BQS7-3;Q9BQS7-4	Hephaestin	0	0	0	0	0	0	0	0	0	0	0	0	0	0	0	0	0	0	0	0	0	0	0	0	0	0	0	0	0	0	0	0	0	0	0	0	52253200	6399800	15431220	142981400	9663200	12414180	83984600	23247000	3263600	0	0
HERC1	Q15751	Probable E3 ubiquitin-protein ligase HERC1	0	0	0	0	0	0	0	0	0	0	0	0	0	0	0	0	0	0	0	0	0	0	0	0	0	0	0	0	0	0	0	0	0	0	0	0	24450000	38433000	46120000	47716000	30734000	36063900	41021000	62585000	0	11559800	0
HERC2	O95714	E3 ubiquitin-protein ligase HERC2	0	0	0	0	0	0	0	0	0	0	0	0	0	0	0	0	0	0	0	0	0	0	0	0	0	0	0	0	0	0	0	0	0	0	0	0	23408000	49258000	189960000	55543000	59887500	0	74756400	2308500	0	0	0
HEXA	P06865;P06865-2	Beta-hexosaminidase subunit alpha	31992500	4881600	0	0	30218200	19597700	89329300	0	0	0	0	0	12046000	2421000	28755700	0	41820700	0	33796700	25905900	61529000	28206100	7246800	17770500	9683700	45915000	24563600	3411000	7270700	0	0	17423200	23472000	3205400	31693900	19633100	1346586000	2279399000	1394316300	1699883000	1762013200	1407441600	4026494000	1524748500	663440100	220590800	7297000
HEXB	P07686	Beta-hexosaminidase subunit beta	41810500	20256500	21171500	0	35769000	27397700	90395800	14683000	24625000	4064100	0	0	3208100	11475000	46306100	4419400	58766200	27577400	20020000	52182000	116617800	52643300	38987300	60569100	49680800	84465500	36126000	23955500	24583100	6629400	15673800	51009000	65666300	9646800	46392200	52270900	568058700	678296500	550071800	655025900	880587300	450026500	1412638900	586444500	378354000	227334190	7807900
HGF	P14210;P14210-2;P14210-3;P14210-4;P14210-5;P14210-6	Hepatocyte growth factor	0	0	0	0	0	0	0	0	0	0	0	0	0	0	0	0	0	0	0	0	0	0	0	0	0	0	0	0	0	0	0	0	0	0	0	0	0	3059600	0	14867000	0	8688800	4073100	0	1133000	0	0
HGFAC	Q04756	Hepatocyte growth factor activator	0	6343600	61605300	5180600	11487100	9880600	26679400	9857500	0	0	4201600	21257500	26157210	0	7866300	35230600	26321600	5994700	40557000	0	4933700	23524000	0	120118000	22143900	17148600	2478500	0	0	0	6096900	5247700	5605600	36228300	11177500	39035500	2319000	123576200	172914000	0	114391600	4203600	41894900	37005100	73560700	46437800	0
HGS	O14964;O14964-2	Hepatocyte growth factor-regulated tyrosine kinase substrate	0	0	0	0	0	0	0	0	0	0	0	0	0	0	0	0	0	0	0	0	0	0	0	0	0	0	0	14339300	1361200	19065700	0	0	0	0	0	0	0	0	0	0	0	0	0	0	0	0	0
HHIPL1	Q96JK4;Q96JK4-2	HHIP-like protein 1	0	0	0	0	0	0	0	0	0	0	0	0	0	0	0	0	0	0	0	0	0	0	0	0	0	0	0	0	0	0	0	0	0	0	0	0	9409600	11201400	8515500	3674000	5169200	4096800	6484300	5345400	4258100	1808200	0
HIBCH	Q6NVY1;Q6NVY1-2	3-hydroxyisobutyryl-CoA hydrolase, mitochondrial	0	0	0	0	0	0	0	0	0	0	0	0	0	0	0	0	0	0	0	0	0	0	0	0	0	0	0	0	0	0	0	0	0	0	0	0	0	0	0	0	0	0	0	0	0	10944500	0
HINT1	P49773	Adenosine 5`-monophosphoramidase HINT1	0	0	0	0	0	7352700	0	0	3502800	30958300	52794400	0	0	36393000	0	7586000	0	0	0	0	39013000	31335300	20454600	18932000	254056800	8519700	4344600	321890000	79546500	799065000	52238200	320690400	71645400	202648000	0	0	26344400	25847020	29189800	152002800	70194800	314657000	41169300	50936800	541572000	815043000	0
HINT2	Q9BX68	Adenosine 5`-monophosphoramidase HINT2	0	0	0	0	0	0	0	0	0	0	0	0	0	0	0	0	0	0	0	0	0	0	0	0	0	0	0	0	0	0	0	0	0	0	0	0	0	0	0	0	8511400	0	0	0	0	58317900	0
HINT3	Q9NQE9	Adenosine 5`-monophosphoramidase HINT3	0	0	0	0	0	0	0	0	0	0	0	0	0	0	0	0	0	0	0	0	0	0	0	0	0	0	0	41958900	2258280	31236100	0	0	0	0	0	0	0	0	0	0	0	0	0	0	0	0	0
HK1	P19367;P19367-2;P19367-3;P19367-4	Hexokinase-1	0	0	0	0	0	0	0	0	0	0	0	0	0	0	0	0	0	0	0	6345400	9863300	1794000	0	5687000	231183000	13367000	1527700	2051832141	293566274	1476820247	20628100	356128700	11147700	36475700	8116100	21477400	220839689	120503813	17796920	225142600	267578127	28765860	197147368	85095330	83851161	48270379	0
HK3	P52790	Hexokinase-3	0	0	0	0	0	0	0	0	0	0	0	0	0	0	0	0	0	0	0	0	0	0	0	0	0	0	0	517859	6426	1339353	0	0	0	0	0	0	15111	44087	0	0	6985493	0	2411632	13270	8561169	2811	0
HLA-A	P04439;P04439-2	HLA class I histocompatibility antigen, A alpha chain	6994133	8468667	39589796	12997605	21585046	76041734	17272689	29146193	4161984	3823186	2106700	10942818	557350	0	22083653	137353345	4066380	25698503	18917748	44549614	113869005	92649953	80776003	92138433	442441582	71453325	60436976	54216208	47832962	468533668	27687805	78140488	166988482	340474494	13814183	48546755	72457463	22048247	125152454	178109226	170858820	666770168	98823998	228496275	16937244	146224951	11517000
HLA-B	P01889	HLA class I histocompatibility antigen, B alpha chain	0	0	1630074	12968000	0	86287202	13739000	11155567	578361	42112505	2106700	10750330	0	0	54170625	17377933	4107060	1245898	9602500	26002731	185004615	130017911	230687563	8451189	359727763	57708656	19488778	196902548	329146660	107466729	29264349	38427309	133125229	134861242	26535968	12427126	93508011	77537605	77683213	199040382	61282203	425784606	103472550	74499502	69207653	648620617	12630354
HLA-C	P10321;P10321-2	HLA class I histocompatibility antigen, C alpha chain	6994133	8468667	5432547	0	12476672	91677343	8118805	12535848	8075771	48214022	0	7526233	20671900	0	18587511	364217890	16346780	6380639	5534626	59998295	169326632	88227129	32301726	13615712	186181109	97844687	46987827	157169515	185538349	105023627	16293617	31715384	134725824	262004979	13294930	29574615	82091872	166185912	75725670	294173110	26331671	501626849	107964271	227620065	165158064	609149761	5110530
HLA-DRA	P01903	HLA class II histocompatibility antigen, DR alpha chain	0	0	16281500	0	0	14738000	10546000	0	0	0	0	4609900	0	0	18501800	0	0	0	0	0	30582600	35774200	18766000	0	103843000	15275000	10374800	89801000	122541700	111580000	11384000	6218700	149073100	29095000	7551400	0	1997900	15946500	16366200	13358000	551630	27312900	42735800	6873300	9122600	166020000	0
HLA-DRB1	P01911	HLA class II histocompatibility antigen, DRB1 beta chain	0	0	0	0	0	0	0	0	0	0	0	0	0	0	0	0	0	0	0	6838300	298138972	106490748	94392965	9858500	127793582	43081247	0	243396871	314602431	99176362	16713255	87812039	281180664	4184551	7516700	0	0	38283930	45184000	26465000	5111700	36016459	27604000	5952300	30092337	150337729	0
HLA-DRB3	P79483	HLA class II histocompatibility antigen, DR beta 3 chain	0	0	0	0	0	0	0	0	0	0	0	0	0	0	0	0	0	0	0	0	44917028	15551752	21694335	9858500	4859418	11375253	0	11042129	91100569	27480738	5802045	112748961	51941336	59702549	0	0	0	34970	0	0	0	8941041	0	0	764863	24663071	0
HLA-G	P17693;P17693-2;P17693-4;P17693-5;P17693-6	HLA class I histocompatibility antigen, alpha chain G	0	0	0	0	0	0	0	0	0	0	0	0	0	0	0	0	0	0	0	9748794	23773767	13797349	12343598	3699645	12204027	6671747	1939278	12714721	31804938	22061432	5263981	3201129	17636210	29840625	5941061	168837	25253557	17118398	33786771	116312124	15758040	184050951	50248514	25328771	36231446	192894132	0
HLA-H	P01893	Putative HLA class I histocompatibility antigen, alpha chain H	6994133	8468667	17596883	428395	18697780	95282223	8118805	29146193	4161984	3823186	2106700	10942818	557350	0	12165212	169266232	16346780	13282060	5534626	21389966	74406281	54147058	42918511	31511319	212275807	59869984	39580970	54346008	49038292	24338743	17617428	20147589	69038454	138643961	11751138	14803667	51039996	30338139	64900153	109780358	44313246	350737406	105911207	135467386	33419373	153949241	414315
HMBS	P08397;P08397-2;P08397-3;P08397-4	Porphobilinogen deaminase	0	0	0	0	0	0	0	0	0	0	0	0	0	0	0	0	0	0	0	62484000	68752000	17805000	145020000	67286000	128680000	85292000	43018000	44602000	0	141688500	51137000	54958000	91805000	17709000	102610000	26905000	0	0	0	4625500	0	12979000	0	0	29222810	2520500	0
HMCN1	Q96RW7;Q96RW7-2;Q96RW7-3	Hemicentin-1	0	0	0	0	0	0	0	0	0	0	0	0	0	0	0	0	0	0	0	0	0	0	0	0	0	0	0	0	0	0	0	0	0	0	0	0	159905760	477253500	49855200	4972470	47299830	27478480	107757200	44214650	21888660	275360	0
HMGA1	P17096;P17096-2;P17096-3	High mobility group protein HMG-I/HMG-Y	0	0	0	0	0	0	0	0	0	0	0	0	0	0	0	0	0	0	0	0	0	0	0	0	0	0	0	0	0	0	0	0	0	0	0	0	474480	0	17603000	4474900	6704000	10171600	5217000	863780	0	142761000	0
HMGB1	P09429	High mobility group protein B1	0	0	0	0	0	0	0	0	0	413030154	29761100	0	0	0	0	0	0	0	0	0	0	0	0	0	0	0	0	23902000	192288193	26296000	2154400	14020000	0	76739995	0	0	780459	1281100	39832756	31037000	15969600	85063307	25209521	0	108896845	4705049029	0
HMGB2	P26583	High mobility group protein B2	0	0	0	0	0	0	0	0	0	122772046	0	0	0	0	0	0	0	0	0	0	0	0	0	0	0	0	0	0	59869007	0	0	0	0	12347905	0	0	2568241	0	9066844	20273900	3945900	114619293	6053679	0	74166655	2179985971	0
HMGB3	O15347	High mobility group protein B3	0	0	0	0	0	0	0	0	0	0	0	0	0	0	0	0	0	0	0	0	0	0	0	0	0	0	0	0	0	0	0	0	0	0	0	0	0	0	0	0	0	1453100	0	0	2524200	45078600	0
HMGN1	P05114	Non-histone chromosomal protein HMG-14	0	0	0	0	0	0	0	0	0	0	0	0	0	0	0	0	0	0	0	0	0	0	0	0	0	0	0	0	0	0	0	0	0	0	0	0	0	0	2439100	3148100	2582800	5402520	2804600	0	5560860	101108000	0
HMGN5	P82970	High mobility group nucleosome-binding domain-containing protein 5	0	0	0	0	0	0	0	0	0	0	0	0	0	0	0	0	0	0	0	0	0	0	0	0	0	0	0	0	0	0	0	0	0	0	0	0	0	0	0	0	1765890	695370	4884300	0	629220	382361300	0
HMOX2	P30519;P30519-2	Heme oxygenase 2	0	0	0	0	0	0	0	0	0	0	0	0	0	0	0	0	0	0	0	0	0	0	0	0	0	0	0	34681000	4399800	0	0	0	0	0	0	0	0	0	0	0	0	0	0	0	0	24735000	0
HNMT	P50135	Histamine N-methyltransferase	0	0	0	0	0	0	0	0	0	0	0	0	0	0	0	0	0	0	0	0	0	0	0	0	0	0	0	0	0	0	0	0	0	0	0	0	649870	0	9009700	840020	52140000	37765000	0	0	12762330	0	0
HNRNPA0	Q13151	Heterogeneous nuclear ribonucleoprotein A0	0	0	0	0	0	0	0	0	0	0	0	0	0	0	0	0	0	0	0	0	0	0	0	0	0	0	0	0	0	0	0	0	0	0	0	0	1373200	0	22032000	10025000	13219000	38137000	15115000	991700	26187000	389929500	0
HNRNPA1	P09651;P09651-2;P09651-3	Heterogeneous nuclear ribonucleoprotein A1	0	0	0	0	0	0	0	0	0	223841100	15160500	0	0	8528900	0	46233600	0	0	0	593580	2236100	18140500	0	0	19031500	0	0	85597900	423932050	94126600	0	31666000	12588100	109943650	0	0	10881000	3595600	53030900	27484400	78163200	148464200	100164600	4336740	105871000	3376816000	0
HNRNPA2B1	P22626;P22626-2	Heterogeneous nuclear ribonucleoproteins A2/B1	0	0	0	0	0	0	0	0	0	127733500	20098400	0	0	0	0	0	0	0	0	0	0	11478000	0	0	0	0	0	451454700	580391500	217358300	23545600	28434600	48211810	104476000	0	0	3177740	945890	47397900	21188300	55093700	77097600	26443900	0	137833500	2305132400	0
HNRNPA3	P51991;P51991-2	Heterogeneous nuclear ribonucleoprotein A3	0	0	0	0	0	0	0	0	0	28736000	0	0	0	0	0	0	0	0	0	0	0	12765900	0	0	0	0	0	41685000	128419700	0	1883600	0	16545200	8876800	0	0	2953700	0	23195590	7095500	23544200	39358960	5735800	0	69753600	920595000	0
HNRNPAB	Q99729;Q99729-2;Q99729-3;Q99729-4	Heterogeneous nuclear ribonucleoprotein A/B	0	0	0	0	0	0	0	0	0	0	0	0	0	0	0	0	0	0	0	0	0	0	0	0	0	0	0	0	17078000	0	0	0	0	22864300	0	0	1344100	7001900	15276000	16905000	22172300	57399900	24760000	17478400	31967400	665793000	0
HNRNPC	P07910;P07910-2;P07910-3;P07910-4	Heterogeneous nuclear ribonucleoproteins C1/C2	0	0	0	0	0	0	0	0	0	34819700	5756400	0	0	0	0	0	0	0	0	0	0	0	0	0	12178500	2805200	0	44512860	135372300	90283060	0	20737700	0	93261000	0	0	4584380	619260	30064500	37056900	17403900	139043800	30786620	3985940	67899100	1975464700	0
HNRNPD	Q14103;Q14103-2;Q14103-3;Q14103-4	Heterogeneous nuclear ribonucleoprotein D0	0	0	0	0	0	0	0	0	0	87630900	0	0	0	0	0	29366000	0	0	0	0	0	14036800	0	0	24534000	0	0	57936270	217645800	0	3781100	0	0	62412000	0	0	17996300	4177900	94948806	112578800	106797653	329716459	86015400	13419700	138036400	2430546696	0
HNRNPDL	O14979;O14979-2;O14979-3	Heterogeneous nuclear ribonucleoprotein D-like	0	0	0	0	0	0	0	0	0	0	0	0	0	0	0	0	0	0	0	0	0	0	0	0	0	0	0	0	0	0	0	0	0	0	0	0	0	0	1133934	0	1593637	36678241	0	0	8603300	335353304	0
HNRNPF	P52597	Heterogeneous nuclear ribonucleoprotein F	0	0	0	0	0	0	0	0	0	0	0	0	0	0	0	0	0	0	0	0	0	0	0	0	0	17083000	0	9364481	16696736	8521227	0	0	0	12072900	0	0	0	0	127393	3265132	4167850	16156192	5663000	0	30393224	221442893	0
HNRNPH1	P31943	Heterogeneous nuclear ribonucleoprotein H	0	0	0	0	0	0	0	0	0	0	0	0	0	0	0	0	0	0	0	0	0	0	0	0	0	0	0	34100019	50712364	42106373	0	0	0	4524000	0	0	0	0	1069757	288048	652840	6970308	0	0	22370086	409997507	0
HNRNPK	P61978;P61978-2;P61978-3	Heterogeneous nuclear ribonucleoprotein K	0	0	0	0	0	0	0	0	0	40131000	11673700	0	0	3616000	0	50499500	0	0	0	0	2289900	15506500	0	0	55557900	0	0	180492300	117347900	138327300	838820	75928000	12930800	79291200	0	0	922220	0	59027790	112054800	117929360	415874350	50259160	2273990	286321860	844487600	0
HNRNPL	P14866;P14866-2	Heterogeneous nuclear ribonucleoprotein L	0	0	0	0	0	0	0	0	0	0	0	0	0	0	0	0	0	0	0	0	0	0	0	0	0	0	0	0	0	0	0	0	0	0	0	0	0	0	34624300	6162400	55136200	77988000	17653270	2272600	62067300	598959300	0
HNRNPM	P52272;P52272-2	Heterogeneous nuclear ribonucleoprotein M	0	0	0	0	0	0	0	0	0	0	0	0	0	0	0	0	0	0	0	19983000	0	0	0	0	0	0	0	61063000	86587800	56509000	17830000	0	0	0	17782000	0	0	0	230120	674120	0	0	0	0	3095370	35831200	0
HNRNPR	O43390;O43390-2;O43390-3;O43390-4	Heterogeneous nuclear ribonucleoprotein R	0	0	0	0	0	0	0	0	0	0	0	0	0	0	0	0	0	0	0	0	0	0	0	0	0	0	0	0	0	0	0	0	0	0	0	0	0	0	7241445	1420879	1265073	15113652	222389	0	15665757	270905091	0
HNRNPU	Q00839;Q00839-2	Heterogeneous nuclear ribonucleoprotein U	0	0	0	0	0	0	0	0	0	77839100	0	0	0	0	0	0	0	0	0	0	0	0	0	0	0	0	0	74605200	30748400	40967800	0	0	0	0	0	0	0	0	4292740	4447800	1473540	46140300	6214990	0	52404100	427449000	0
HNRNPUL1	Q9BUJ2;Q9BUJ2-2;Q9BUJ2-3;Q9BUJ2-4	Heterogeneous nuclear ribonucleoprotein U-like protein 1	0	0	0	0	0	0	0	0	0	0	0	0	0	0	0	0	0	0	0	0	0	0	0	0	0	0	0	0	0	0	0	0	0	0	0	0	22966000	7879600	2985900	23530000	11843000	14226000	23017000	0	2578200	53640300	0
HNRNPUL2	Q1KMD3	Heterogeneous nuclear ribonucleoprotein U-like protein 2	0	0	0	0	0	0	0	0	0	0	0	0	0	0	0	0	0	0	0	0	0	0	0	0	0	0	0	0	0	0	0	0	0	0	0	0	0	1298000	3077160	0	484160	2610900	789290	0	3947800	59649200	0
HP	P00738;P00738-2	Haptoglobin	7581389011	6322487796	52504902672	11507428117	4101290171	1822133958	55642038411	29006054631	6736051772	9052438229	18847579171	74162261303	17437122358	2175975	17332974641	7426921300	31487418485	6915389672	24443811142	6565559837	9456016230	18621532413	15555622883	13501834673	4157619843	51373493489	4821202733	1904887710	3087493609	15887635695	17505736152	44545436	5826789914	13886053760	14655933166	22344028962	885804137	7572058117	12788966682	424901637	2539439150	263883711	5146247064	1093522197	5972254409	80202274087	1011003414
HP1BP3	Q5SSJ5;Q5SSJ5-2;Q5SSJ5-3;Q5SSJ5-5	Heterochromatin protein 1-binding protein 3	0	0	0	0	0	0	0	0	0	0	0	0	0	0	0	0	0	0	0	0	0	0	0	0	0	0	0	0	10703700	0	0	0	0	0	0	0	0	0	0	0	0	0	0	0	0	0	0
HPCA	P84074	Neuron-specific calcium-binding protein hippocalcin	0	0	0	0	0	0	0	0	0	0	0	0	0	0	0	0	0	0	0	0	0	0	0	0	0	0	0	0	0	0	0	0	0	0	0	0	2083550	619900	1617650	4485548	2982750	38982196	1136030	0	3030474	12164605	0
HPR	P00739;P00739-2	Haptoglobin-related protein	1054250789	590997204	6001937828	1764219883	305783929	337741242	7901021489	4209857669	790653908	766447171	3282129429	10863143297	2577360142	11122825	2852459969	894045700	4647267115	597745328	4646843958	1830873193	1203456830	2593510487	2642028717	2028027217	591683937	7730588211	700377521	190487990	313732791	2568409905	3517860448	85441564	1174645086	1812426060	2518382724	3967134098	1038446863	1777303383	3896847118	586822363	1287575050	613692489	2450764936	968813903	1093576391	10042192713	183920466
HPRT1	P00492	Hypoxanthine-guanine phosphoribosyltransferase	0	0	0	0	0	5240900	20537400	0	9618400	34218900	14216000	8663100	3893600	0	12910000	0	6804900	0	0	14454000	25970300	3797000	44548900	2763700	37137400	27601000	12536000	91947000	34154900	87921000	8301900	50544000	21023200	39150000	6786300	7709400	43838390	5174390	2633750	47969400	24718290	65858390	50206200	8553700	243474000	775764200	0
HPX	P02790	Hemopexin	27163018000	27858021200	68552693600	26660308000	46194923900	4653044700	51609268000	60939365000	22500741200	17437278900	21934794900	57643214600	37813265400	21137947200	50829875400	84105652200	61312752000	37039079000	74907596000	21002100200	37645150900	23828708000	33334171500	52303507500	26575365000	44741221400	19715083000	7035081900	3532412600	19720672600	12209579700	23631302100	16995490300	29685249800	24555216000	55730015800	2063388930	4189557300	4852222300	688167800	5606633440	1348095240	3580287710	4551299800	2669183100	11031426700	3469015000
HRAS	P01112;P01112-2	GTPase HRas	0	0	0	0	0	0	0	0	0	0	0	0	0	0	0	0	0	0	0	0	3634374	12899153	0	179172	4868150	0	0	68735555	6579601	93110549	0	17468695	1203493	6457848	0	0	0	0	3584833	0	0	5753894	0	0	10515305	2785567	0
HRG	P04196	Histidine-rich glycoprotein	1839713600	1126432500	2878646100	1705166300	1223379000	1668650700	2136772000	1792086000	969939300	131122600	938120000	2549061800	691249100	1022054400	2981611000	717399000	3236870000	1184131700	5211535200	2798135400	3328385500	1875131700	5160583000	8651180000	5480753000	7132988800	3213801200	555300800	369846100	1497471200	2533205900	7464110000	2790531400	915599200	3001485200	9716902000	17595830860	22383796100	18839731400	44727834200	10552784990	20891456900	40337501910	29620624800	10810406000	2551796000	384087332
HRNR	Q86YZ3	Hornerin	0	0	0	0	0	0	25522000	0	12511000	227092600	0	0	0	0	0	0	0	0	0	46385080	51388750	238862910	164042330	3401900	0	13421300	99749110	548246700	298887820	33409150	159412060	217114140	331686040	53813930	89498280	191623730	0	0	46965360	0	0	0	0	0	3795100	0	838982970
HS6ST1	O60243;O60243-2	Heparan-sulfate 6-O-sulfotransferase 1	0	0	0	0	0	0	0	0	0	0	0	0	0	0	0	0	0	0	0	0	0	0	0	0	0	0	0	0	0	0	0	0	0	0	0	0	200707295	164119213	68731037	220350346	72212489	130833050	259529153	140228419	37821440	1923174	0
HS6ST3	Q8IZP7	Heparan-sulfate 6-O-sulfotransferase 3	39377200	4060400	0	35377100	3675400	10489000	24225000	0	0	0	0	0	0	2191800	15608700	2598200	17980700	8202300	5055700	29222900	0	0	65419000	0	12665800	23182200	0	0	0	0	0	33216300	3466500	0	5160700	0	2729980205	1151318957	482317823	2436215354	755254541	1186288670	2085381837	675206681	433998300	134858216	0
HSD17B10	Q99714;Q99714-2	3-hydroxyacyl-CoA dehydrogenase type-2	0	0	0	0	0	0	0	0	0	0	0	0	0	0	0	0	0	0	0	0	0	0	0	0	0	0	0	23198600	3293500	31906000	0	7763100	0	4456200	0	0	0	0	0	0	0	0	0	0	0	170256000	0
HSD17B12	Q53GQ0;Q53GQ0-2	Very-long-chain 3-oxoacyl-CoA reductase	0	0	0	0	0	0	0	0	0	0	0	0	0	0	0	0	0	0	0	0	0	0	0	0	0	0	0	134631400	0	59726000	0	0	9936900	0	0	0	0	0	0	0	0	0	0	0	0	0	0
HSD17B4	P51659;P51659-2;P51659-3	Peroxisomal multifunctional enzyme type 2	0	0	0	0	0	0	0	0	0	0	0	0	0	0	0	0	0	0	0	0	0	0	0	0	0	0	0	66566500	0	26056400	0	0	0	0	0	0	0	0	0	0	0	0	0	0	0	0	0
HSP90AA1	P07900;P07900-2	Heat shock protein HSP 90-alpha	0	0	0	16286051	0	168019995	11345286	0	19828600	421689326	197360376	40682870	14085412	173691231	0	254788093	0	0	1635200	81979465	345240954	326829958	67229728	82929616	366690123	65649852	154084129	2669766590	697302234	1938686866	196761973	964131055	360718094	532443026	43061328	94214705	428817367	283012506	835074926	2695389014	1290541013	4645929273	1322257095	502499324	2779367214	11250530105	16739275
HSP90AB1	P08238	Heat shock protein HSP 90-beta	0	0	0	5367024	0	64539726	2053407	0	0	239477971	151687376	8096148	2343344	80738273	0	243952199	0	0	0	38537085	207770844	207893925	36287577	41992545	118199764	34318143	64762761	1594901534	504073712	1382037769	86953220	454576352	183915402	330349077	22542230	41125246	243160013	168015978	524858443	1346424270	657638088	2372291826	957302744	235391032	1426719423	6943682513	36857545
HSP90AB2P	Q58FF8	Putative heat shock protein HSP 90-beta 2	0	0	0	5367024	0	12518737	2053407	0	0	4588735	6520008	1897382	2343344	4681556	0	27061225	0	0	0	10865851	20338923	17106816	10949891	10587539	13032250	11337505	8487010	109536109	58444955	138140566	11621118	43289900	3872208	35976997	946342	6161549	16334398	12436877	53413701	118159109	57387042	286596232	86593887	23061345	145622282	730748479	0
HSP90AB4P	Q58FF6	Putative heat shock protein HSP 90-beta 4	0	0	0	0	0	784523	0	0	0	3035967	3251643	0	0	475739	0	517683	0	0	0	0	59779	0	0	0	962764	0	0	33205159	3534203	17344036	0	1847293	368953	0	0	0	4232887	2971059	8201763	29176998	13334762	29216011	12503630	5896473	23088335	123088784	0
HSP90B1	P14625	Endoplasmin	15744000	0	0	16377600	9656900	61442619	10487000	0	15380500	0	0	18357000	0	0	7410500	0	26284400	13548400	0	53964800	51768800	32353800	162926705	37769000	153535000	46638900	2339600	398038807	46687300	108338061	6831800	98919500	85929343	32832000	3479000	28396700	2605942007	1317609528	1925297364	9161612010	1279241428	2652452258	3304290944	1904973054	2360043348	980428918	7898700
HSPA12A	O43301	Heat shock 70 kDa protein 12A	0	0	0	0	0	0	0	0	0	0	0	0	0	0	0	0	0	0	0	0	1824000	0	0	0	39911000	0	882330	351561900	37054300	332490700	0	48332900	0	0	0	0	0	1782300	1556200	0	0	0	0	0	2535200	0	0
HSPA13	P48723	Heat shock 70 kDa protein 13	4520400	5393800	10315000	0	0	0	0	0	0	0	0	5609600	0	0	0	11137000	23322200	16263200	4768800	56305000	47524000	24242500	12729000	12910000	37365400	24655000	23064100	23196100	1780800	12720000	10225000	31842300	14080000	5237400	38277000	20967300	283079700	494826000	390768200	104415400	344828500	113164300	339119600	308051900	290731000	50013700	0
HSPA1A;HSPA1B	P0DMV8;P0DMV8-2;P0DMV9	Heat shock 70 kDa protein 1A; Heat shock 70 kDa protein 1B	1574426	0	0	0	0	25197423	5783000	3690100	7446571	9390570	42335936	9595201	18016699	97082922	0	9114317	0	0	0	22382233	115673352	75273883	13610733	34087512	204794534	19645557	33173735	889587749	108583180	886876586	70014762	322197868	114786371	135903222	6902302	20865963	123163670	91396729	215250849	256231956	248544139	496875971	201556990	127718564	817587418	332684382	6706324
HSPA1L	P34931	Heat shock 70 kDa protein 1-like	446675	0	0	0	0	6631608	5783000	3690100	4312118	12789794	6416155	9595201	4499321	30291803	0	5505801	378083	0	0	2599954078	445588594	837612728	1967855305	2074386865	1640735935	1213473877	121878673	519741858	197082095	497783981	511157705	362591788	515372764	1200965655	954424741	963279239	117852955	81253859	90561629	124885750	162753859	184133732	78774360	100419036	256008596	252113047	4388049
[truncated: 1,960 more rows]
[truncated: 35 more columns]

## Sheet: peptide quant
Peptide quant for processed proteomic profiles of CSF samples in cohort 3
[truncated: 40,395 more rows]
[truncated: 36 more columns]
